# Supplementary material for: Association analyses of host genetics, root-colonizing microbes, and plant phenotypes under different nitrogen conditions in maize
Source: eLife journal article supplement (doi:10.7554/elife.75790), 2022-07-27

# Chitinophagaceae

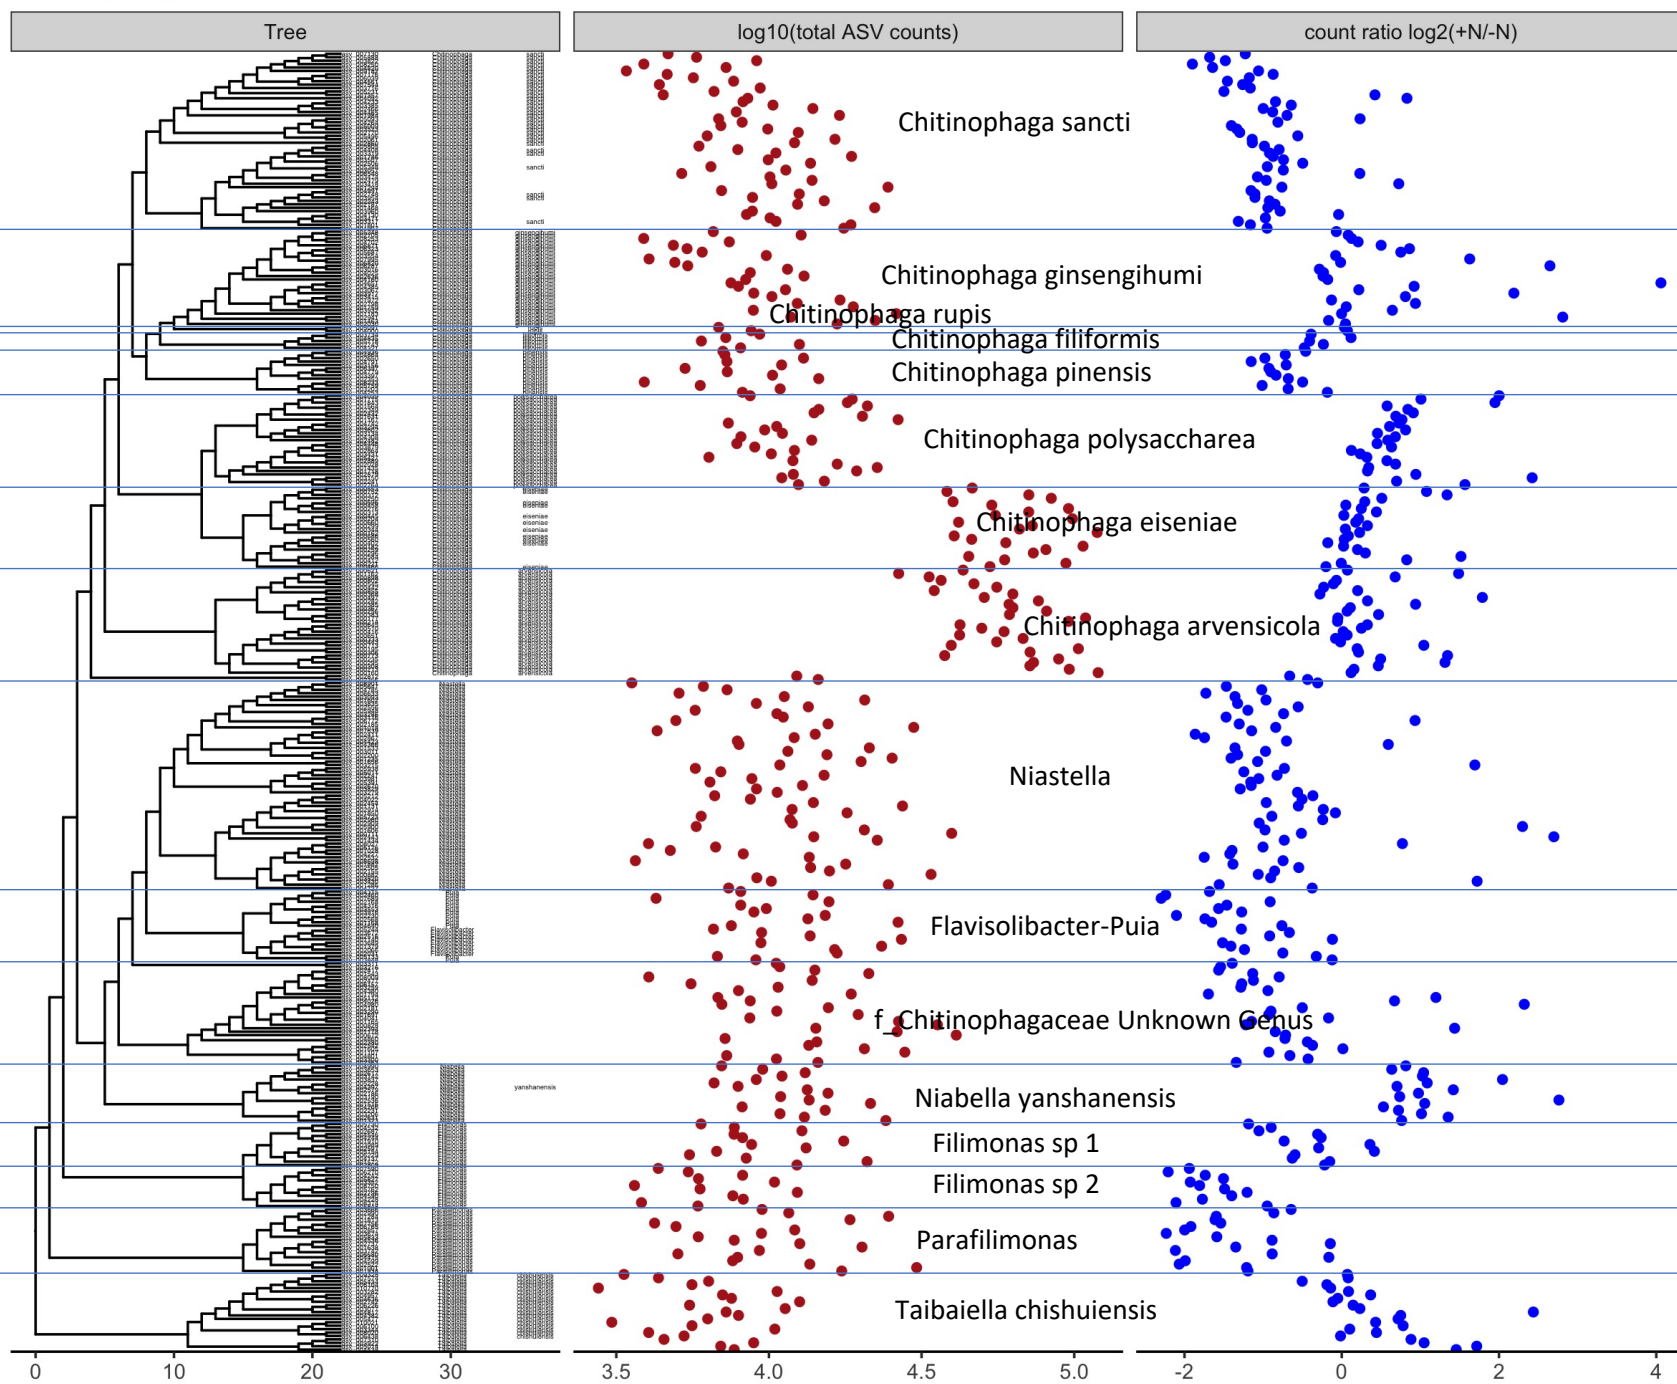

Sphingomonadaceae

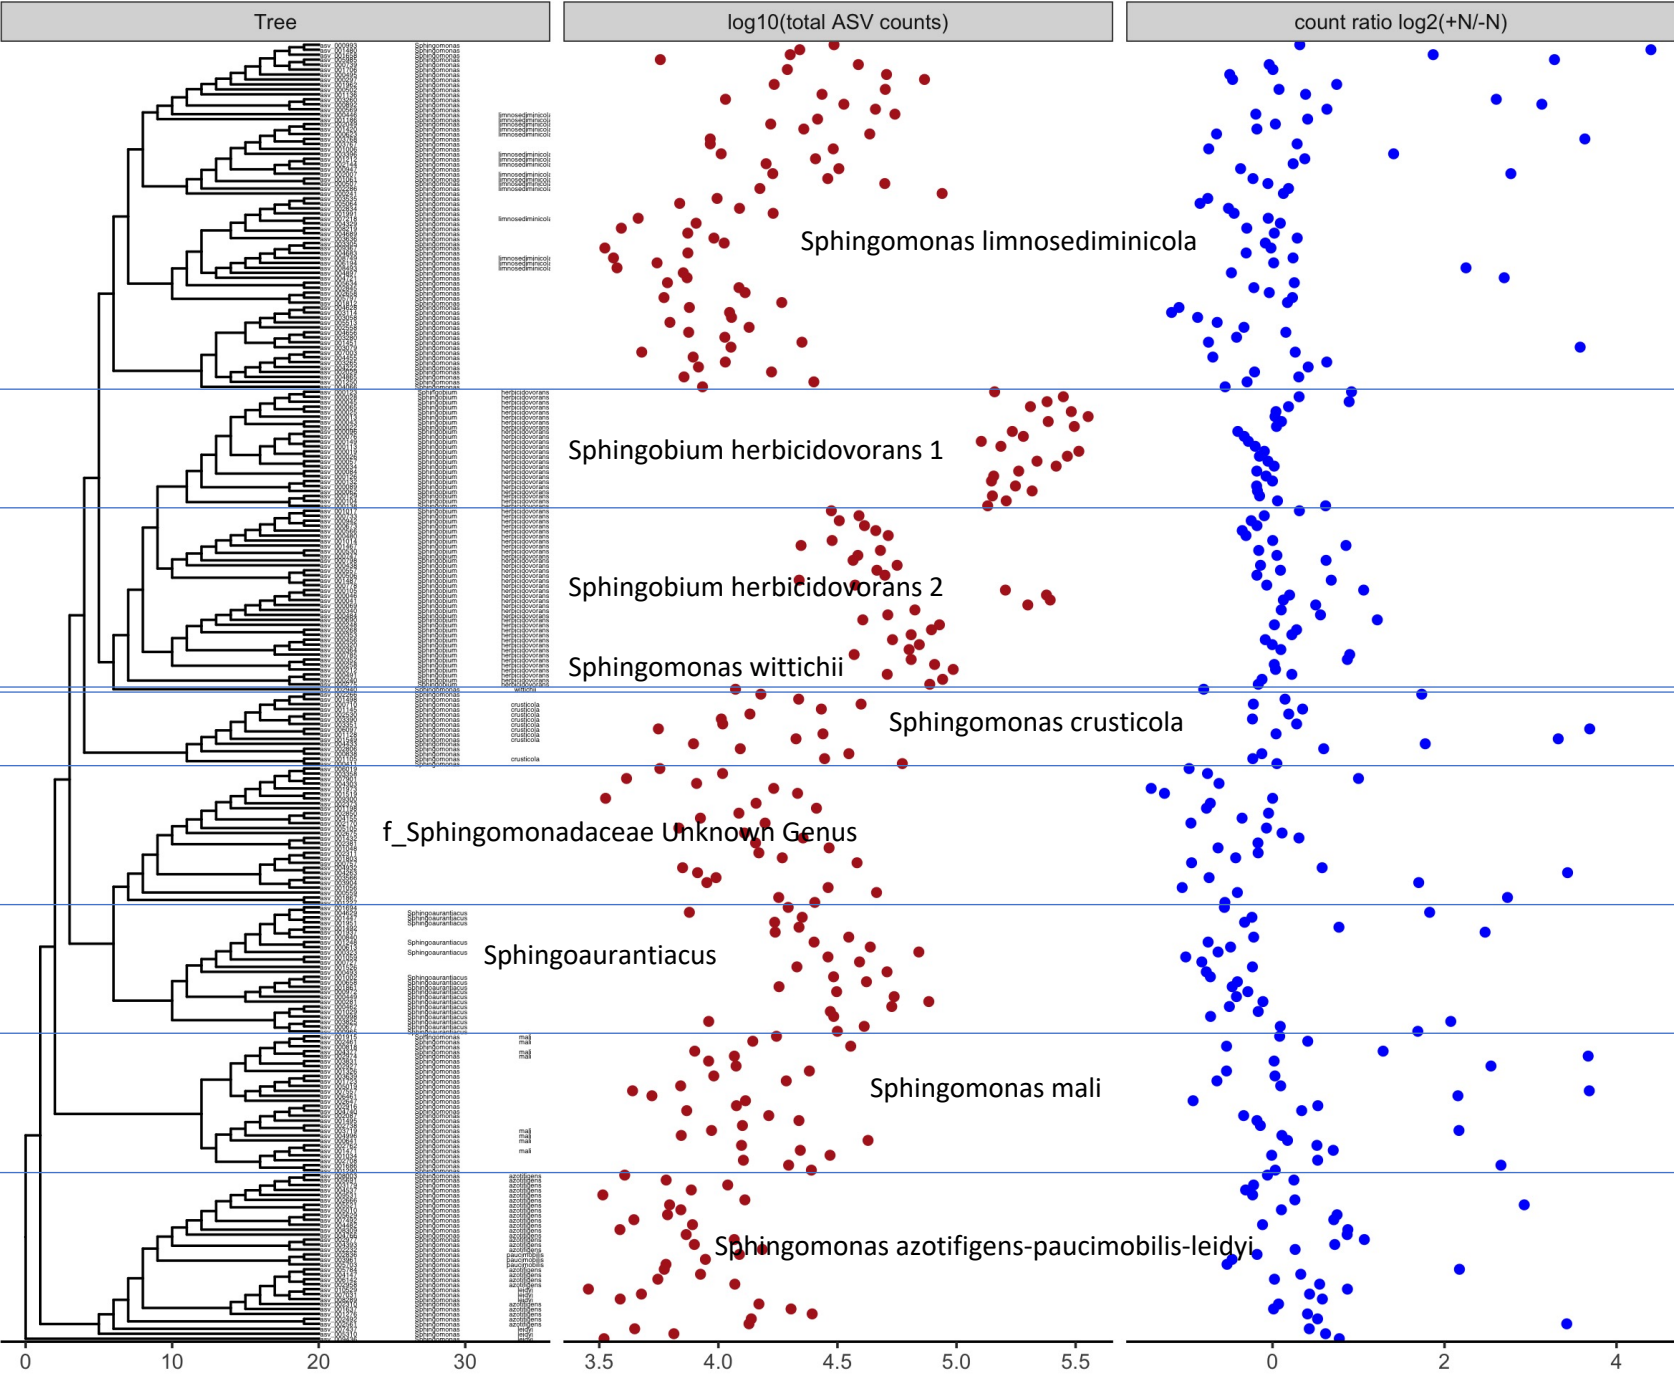

Sphingobacteriaceae

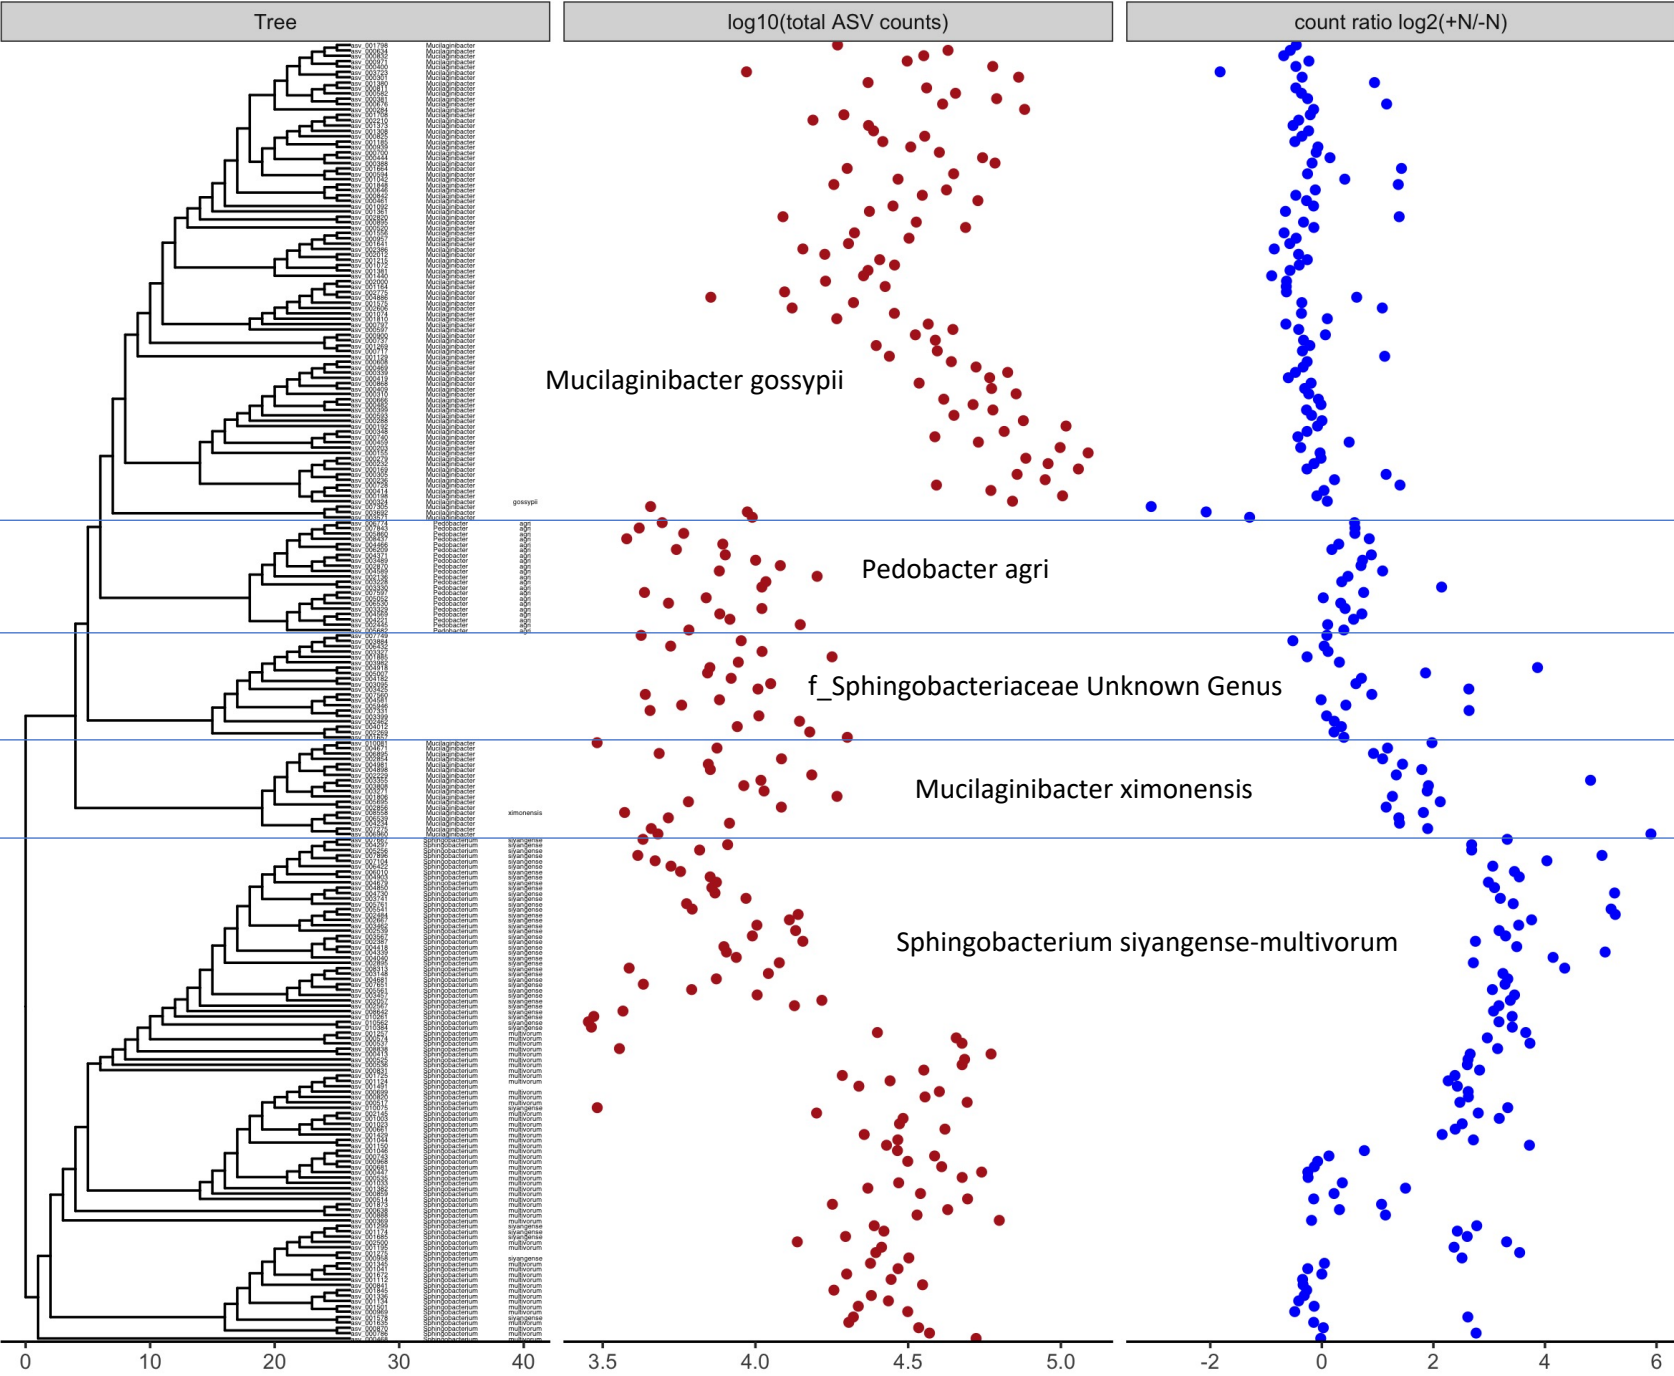

Weeksellaceae

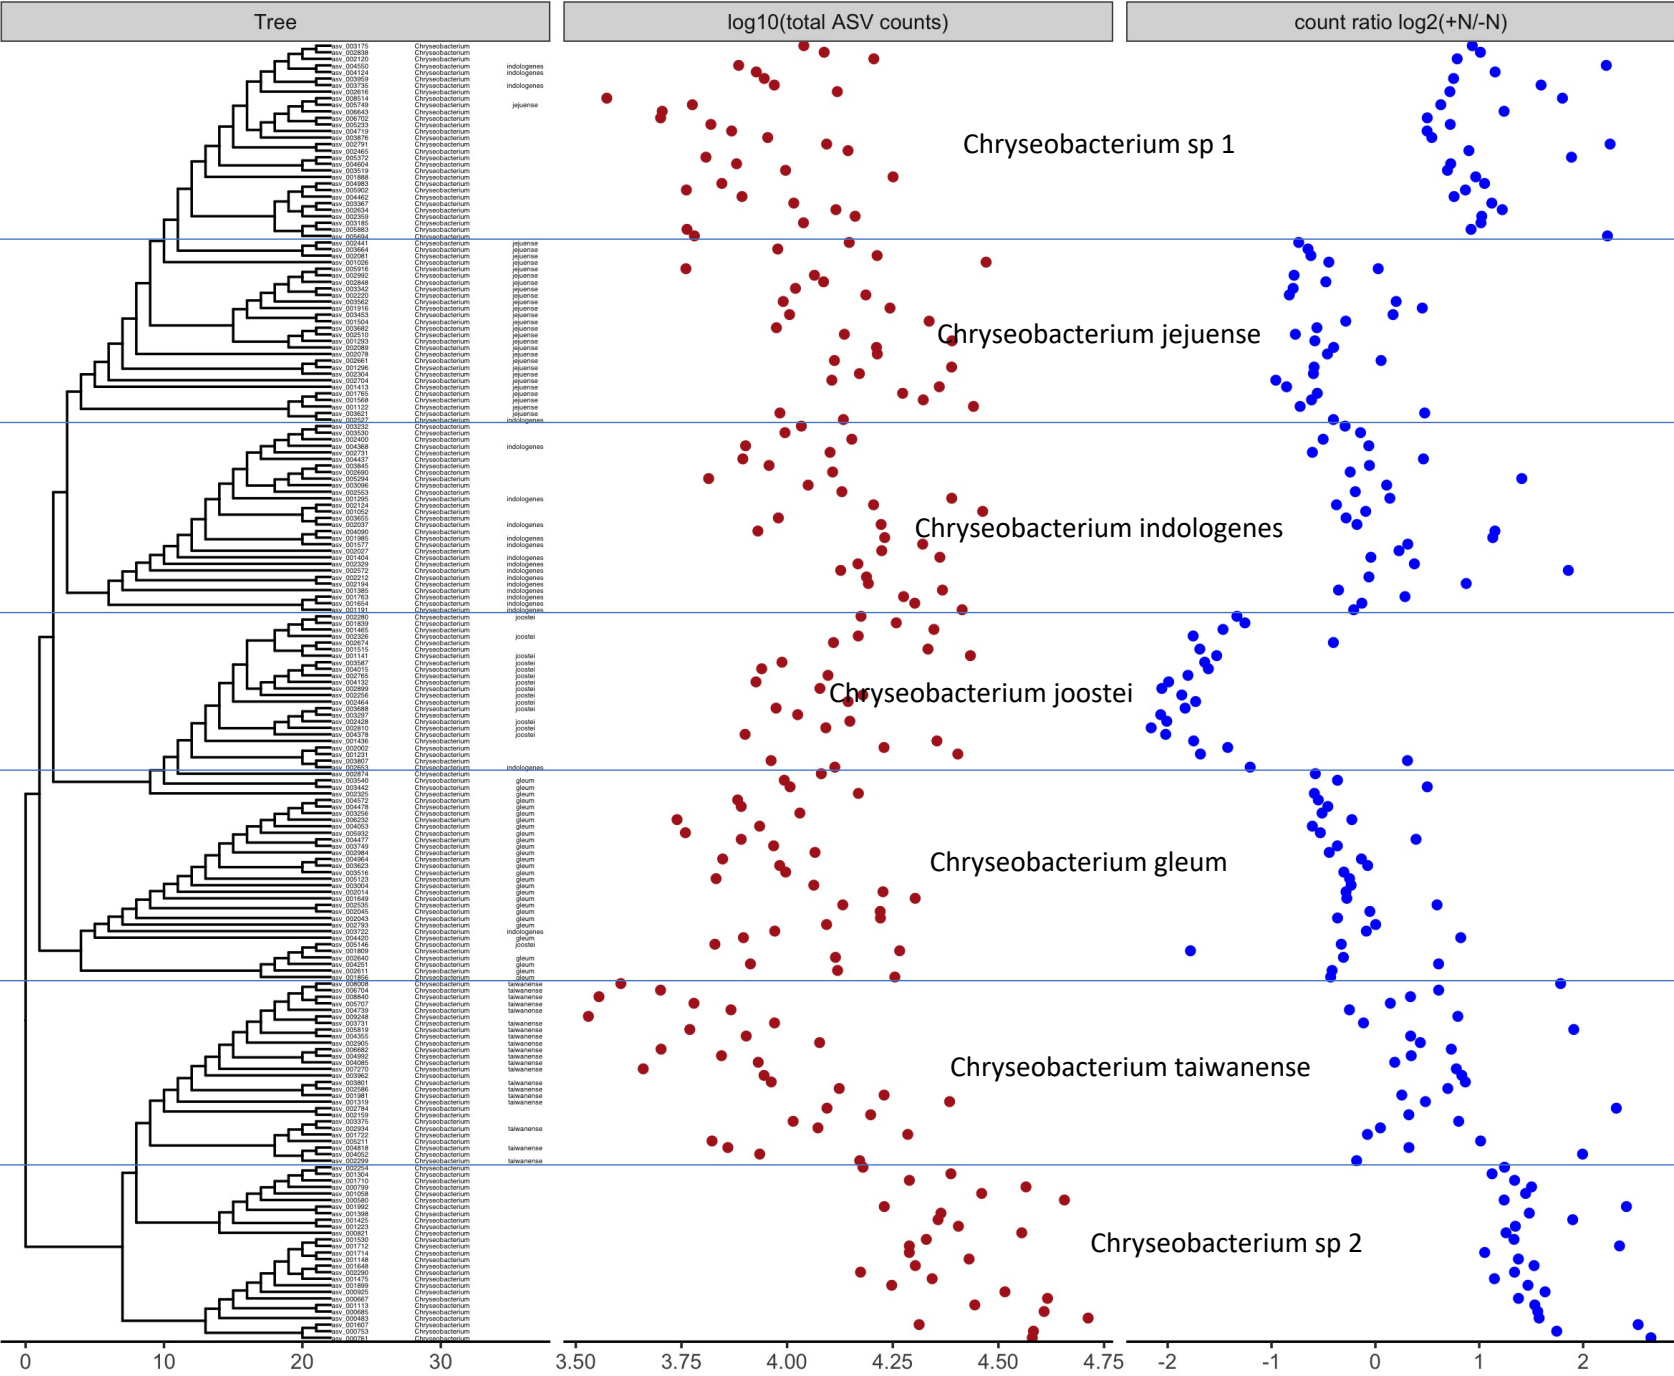



# Oxalobacteraceae

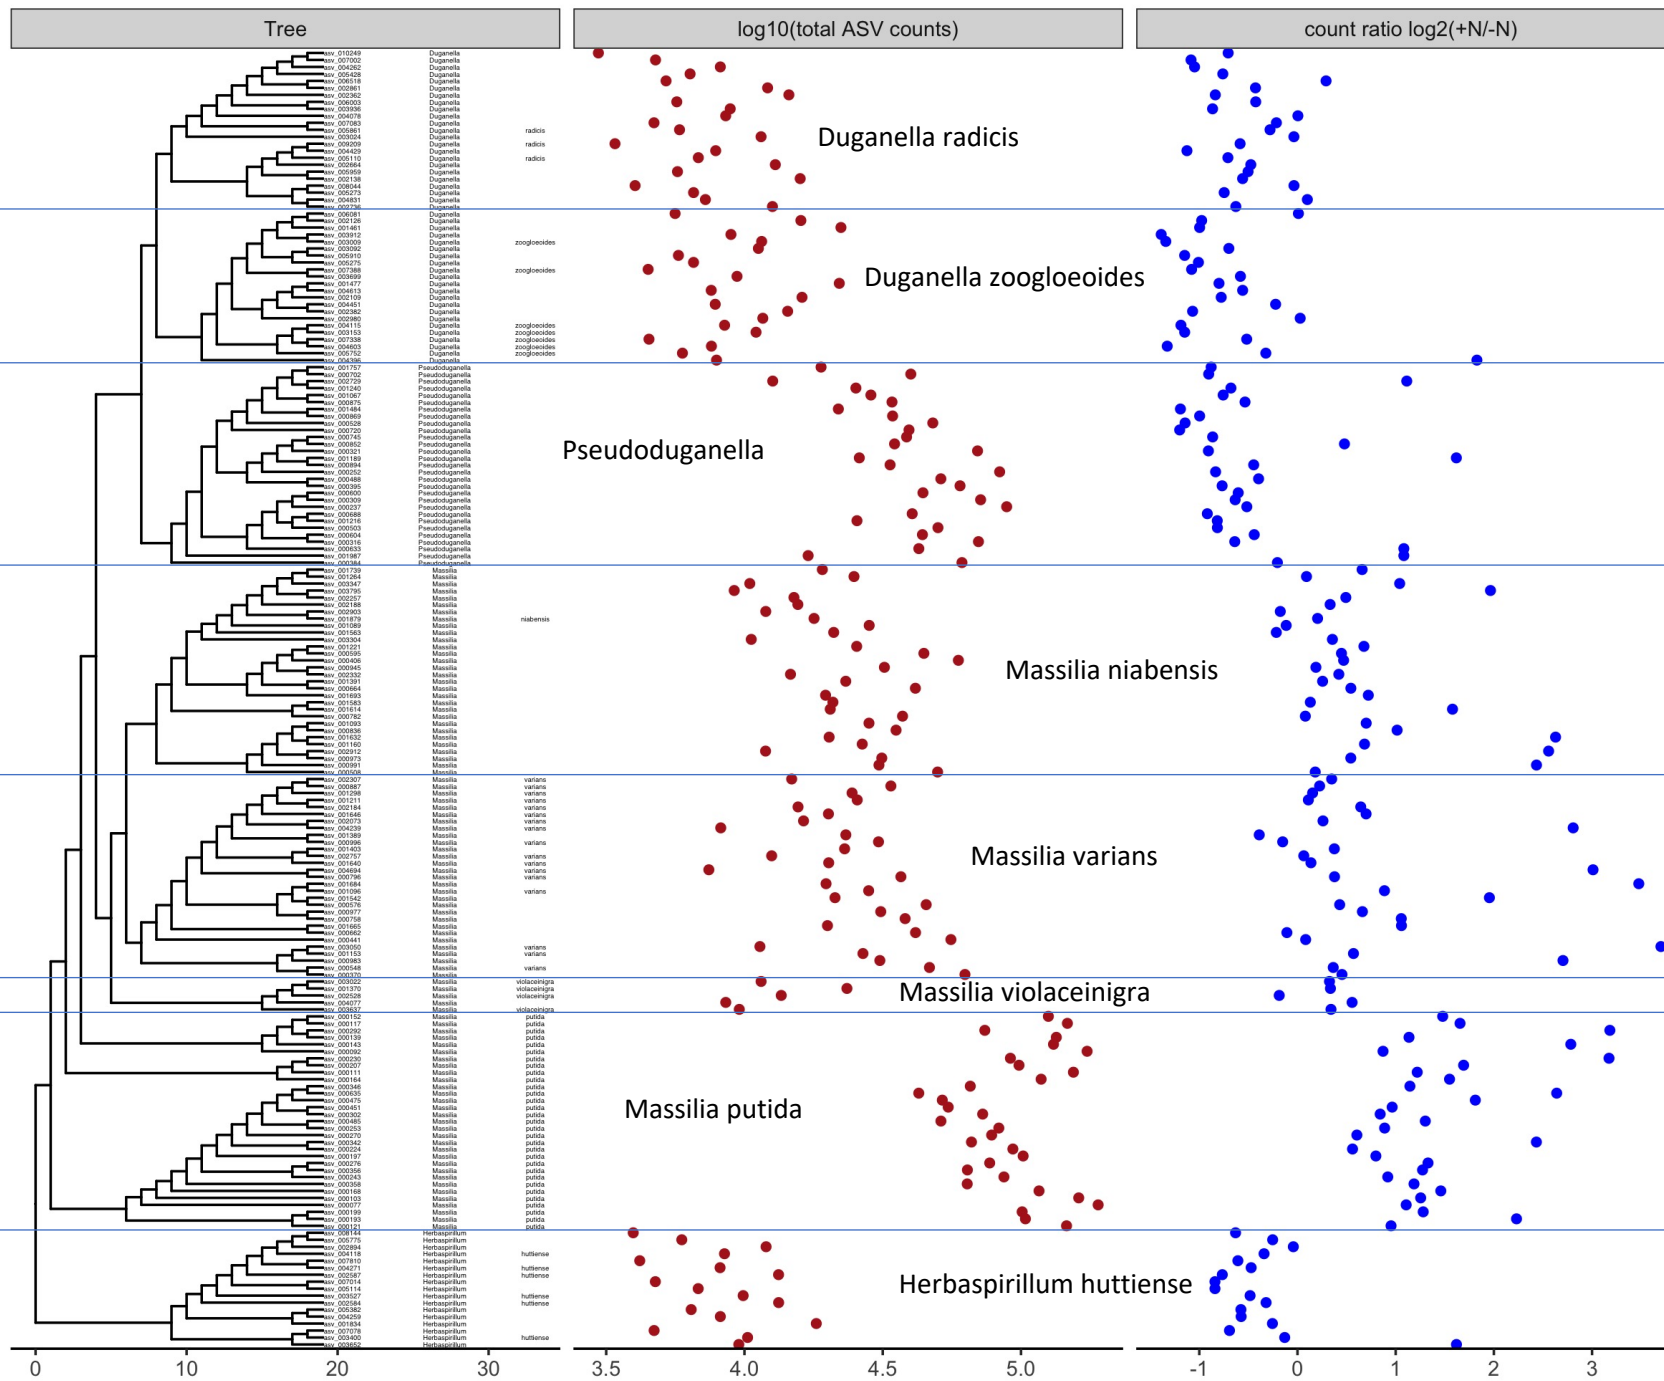

Burkholderiaceae

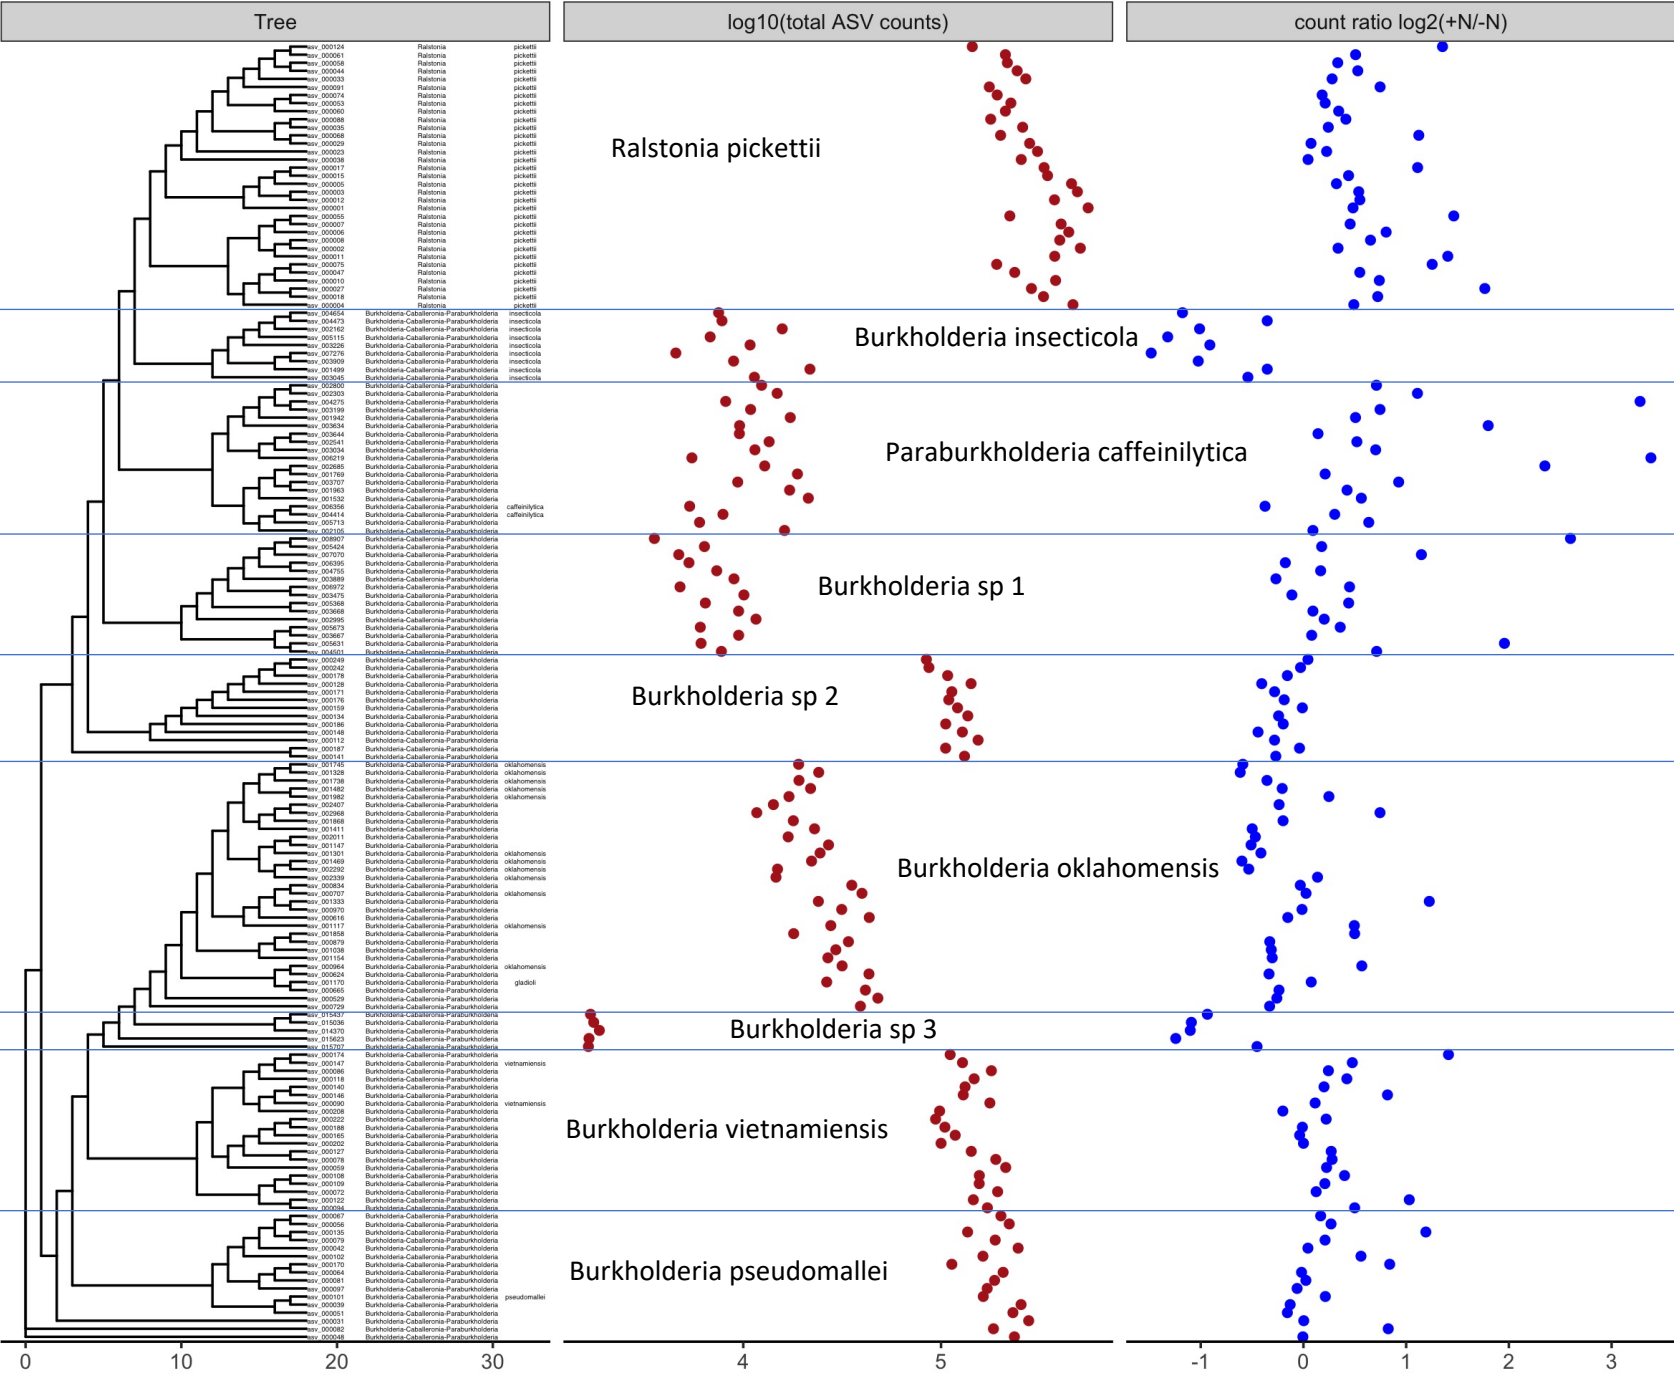

Pseudomonadaceae

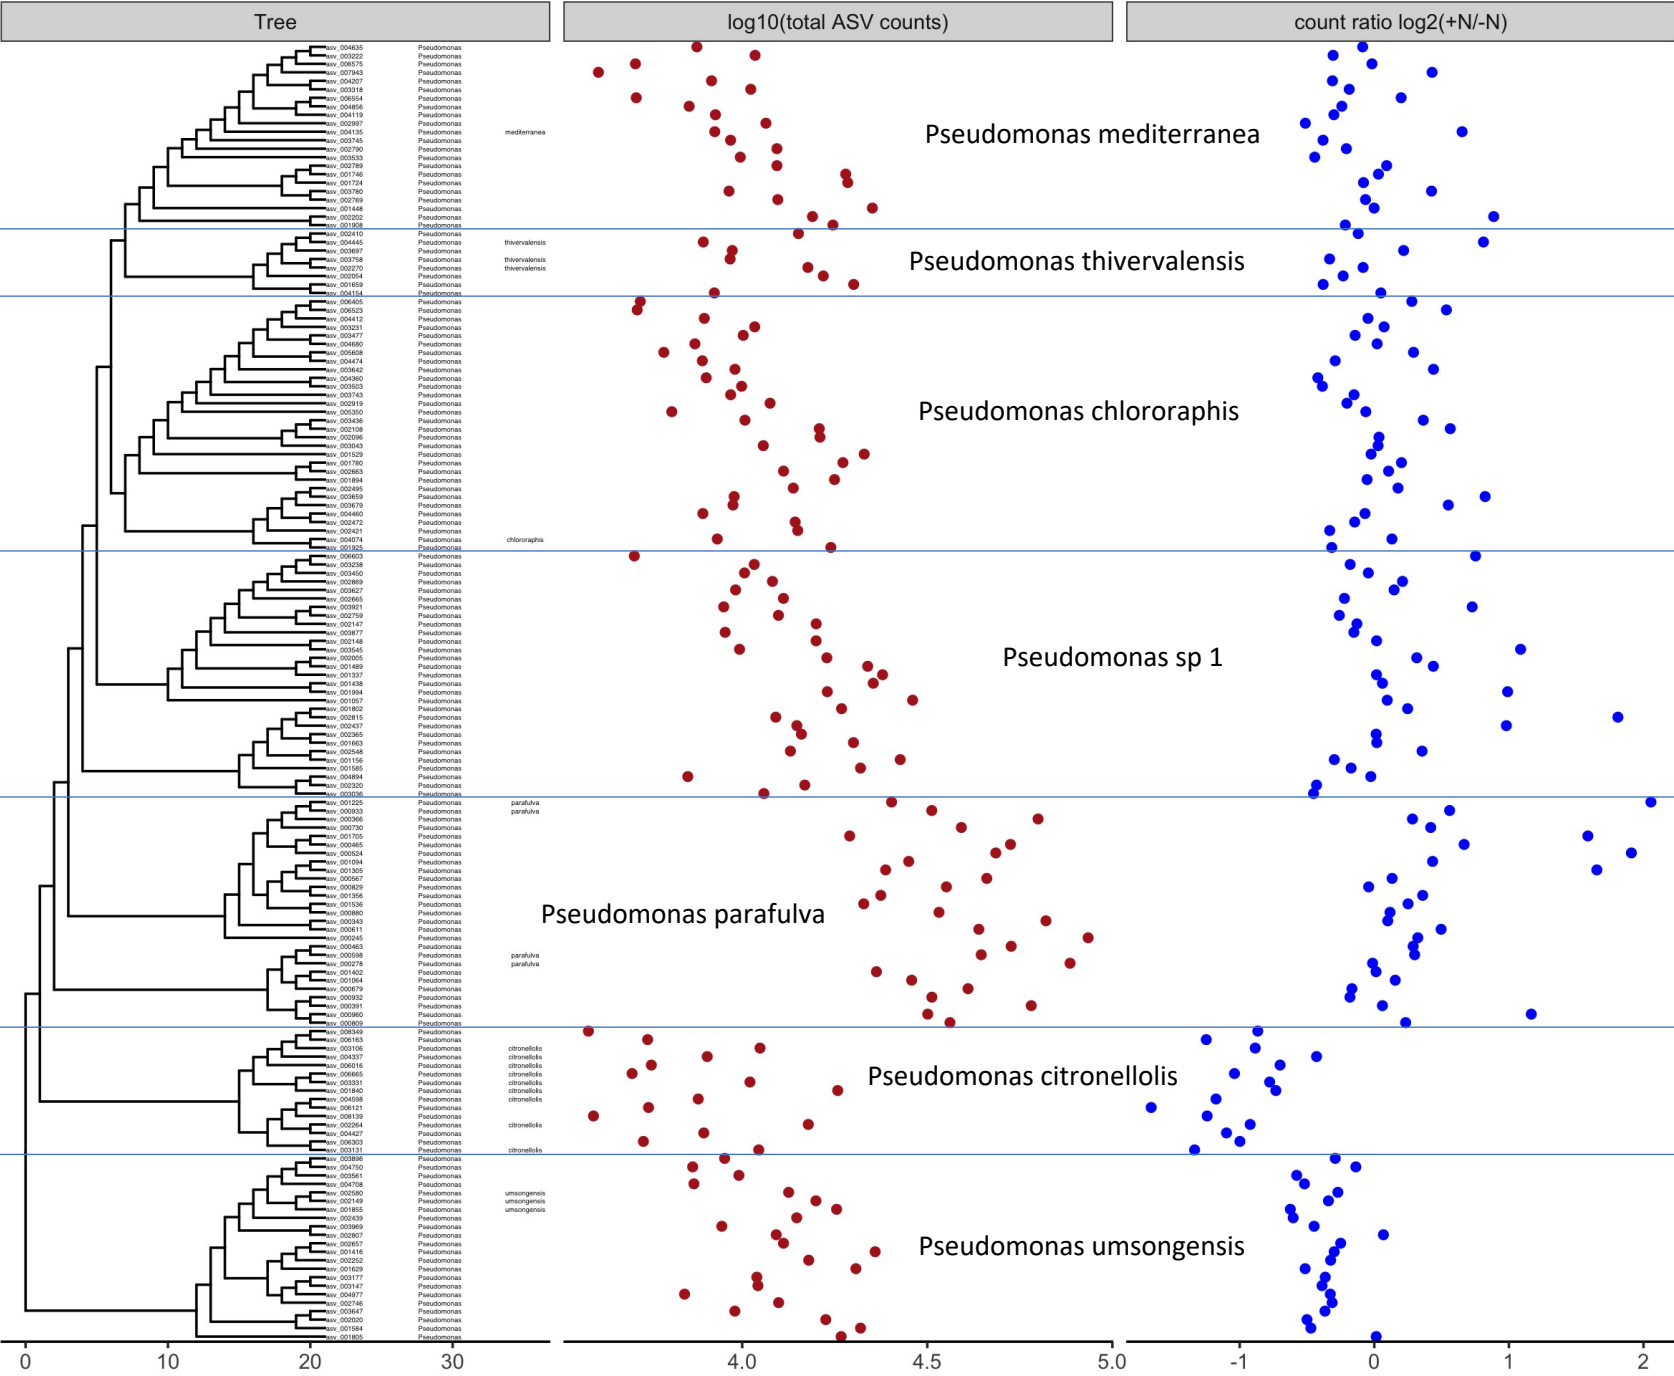

Rhizobiaceae

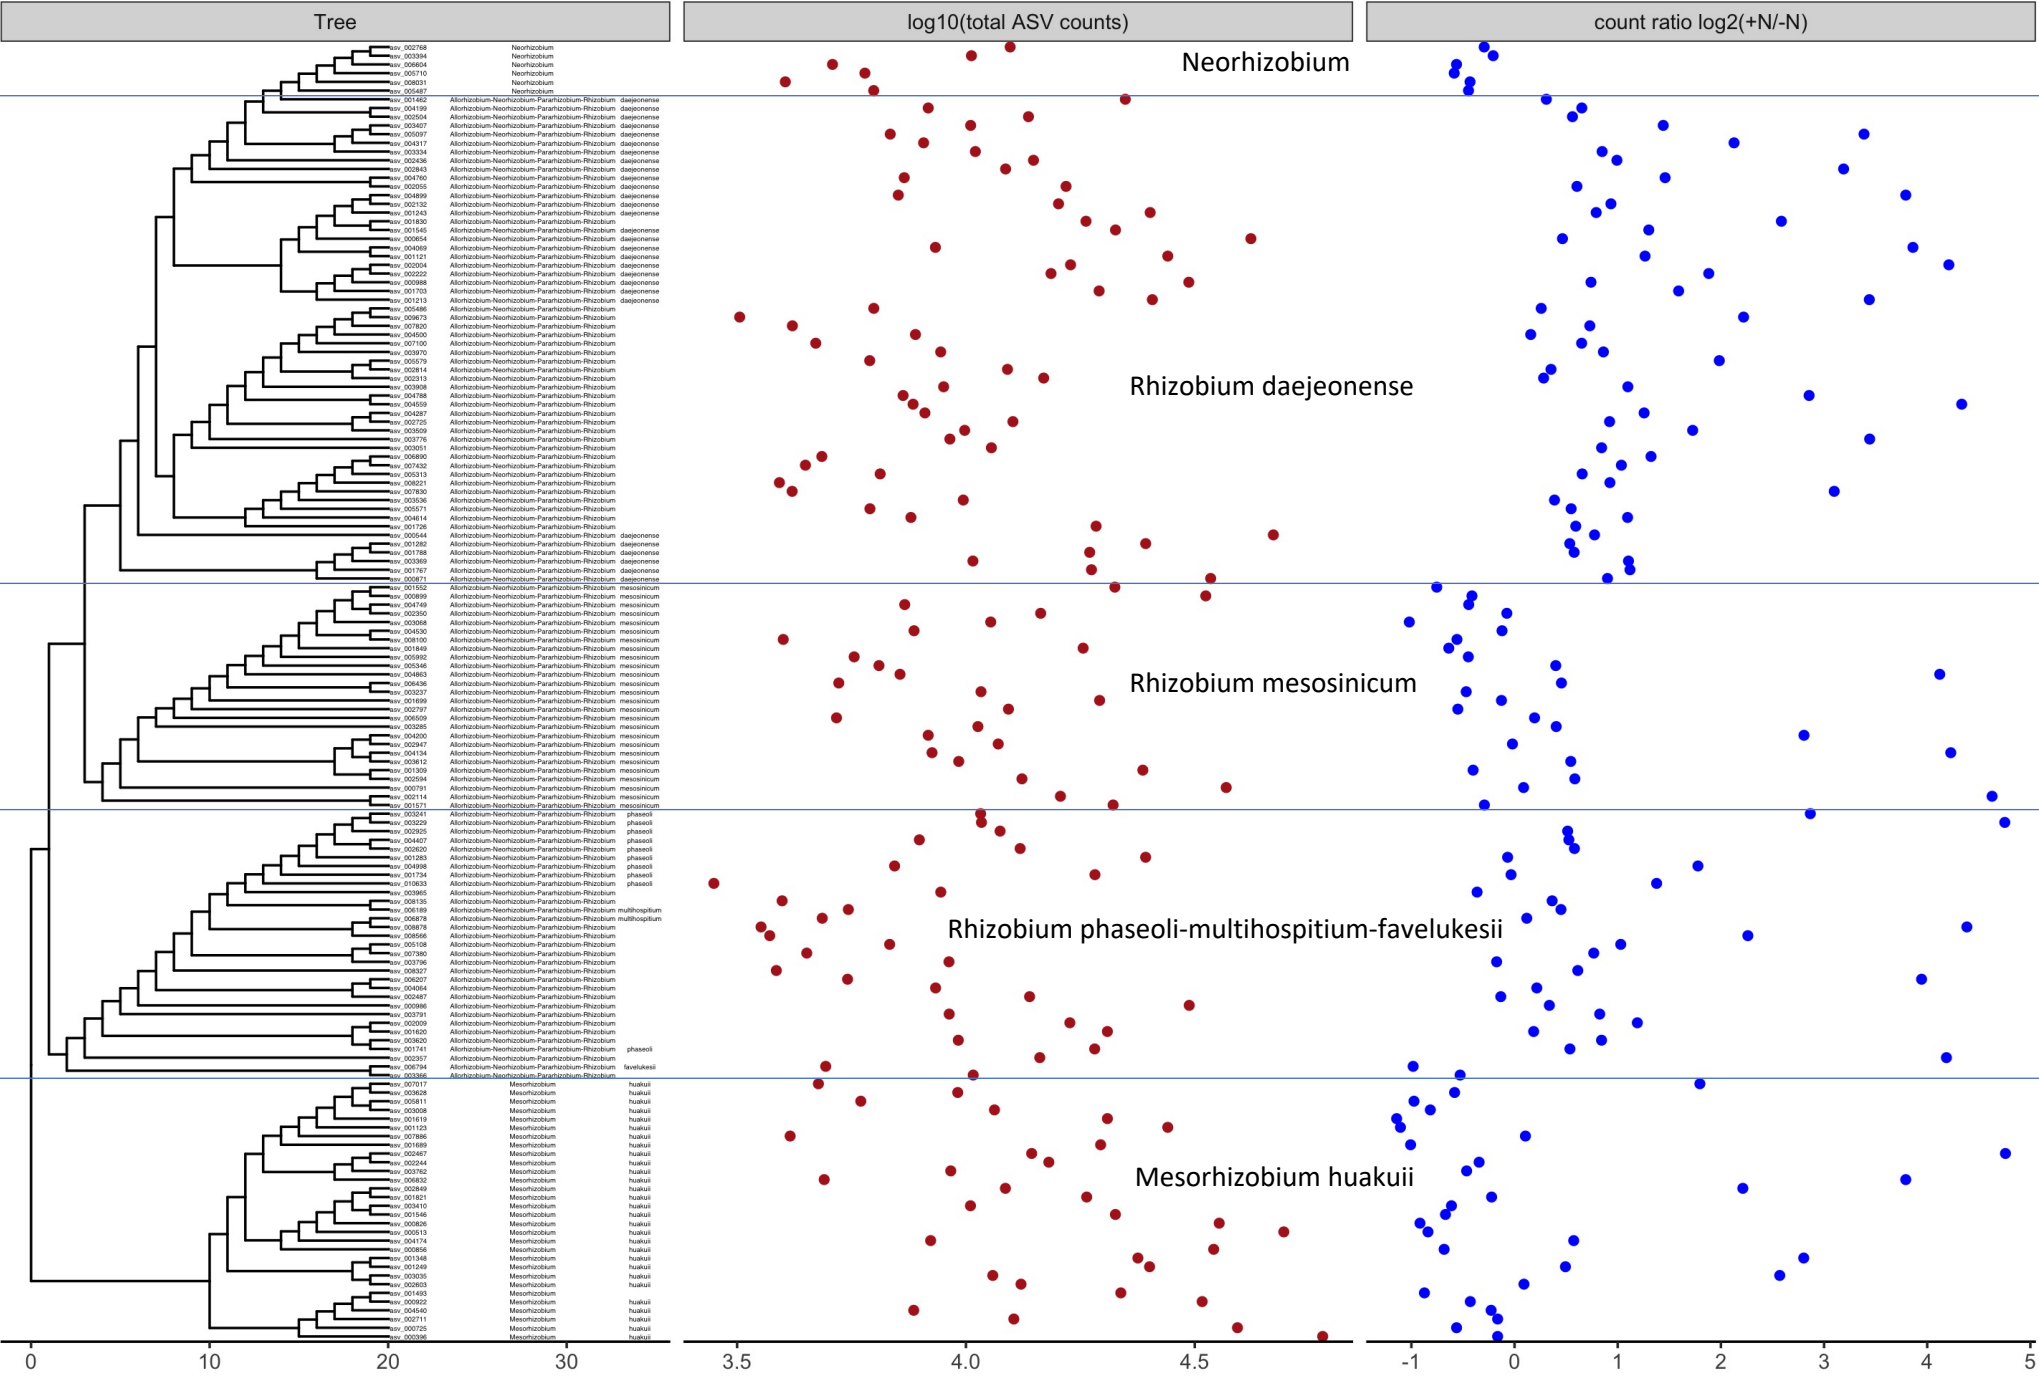



Nocardioideae

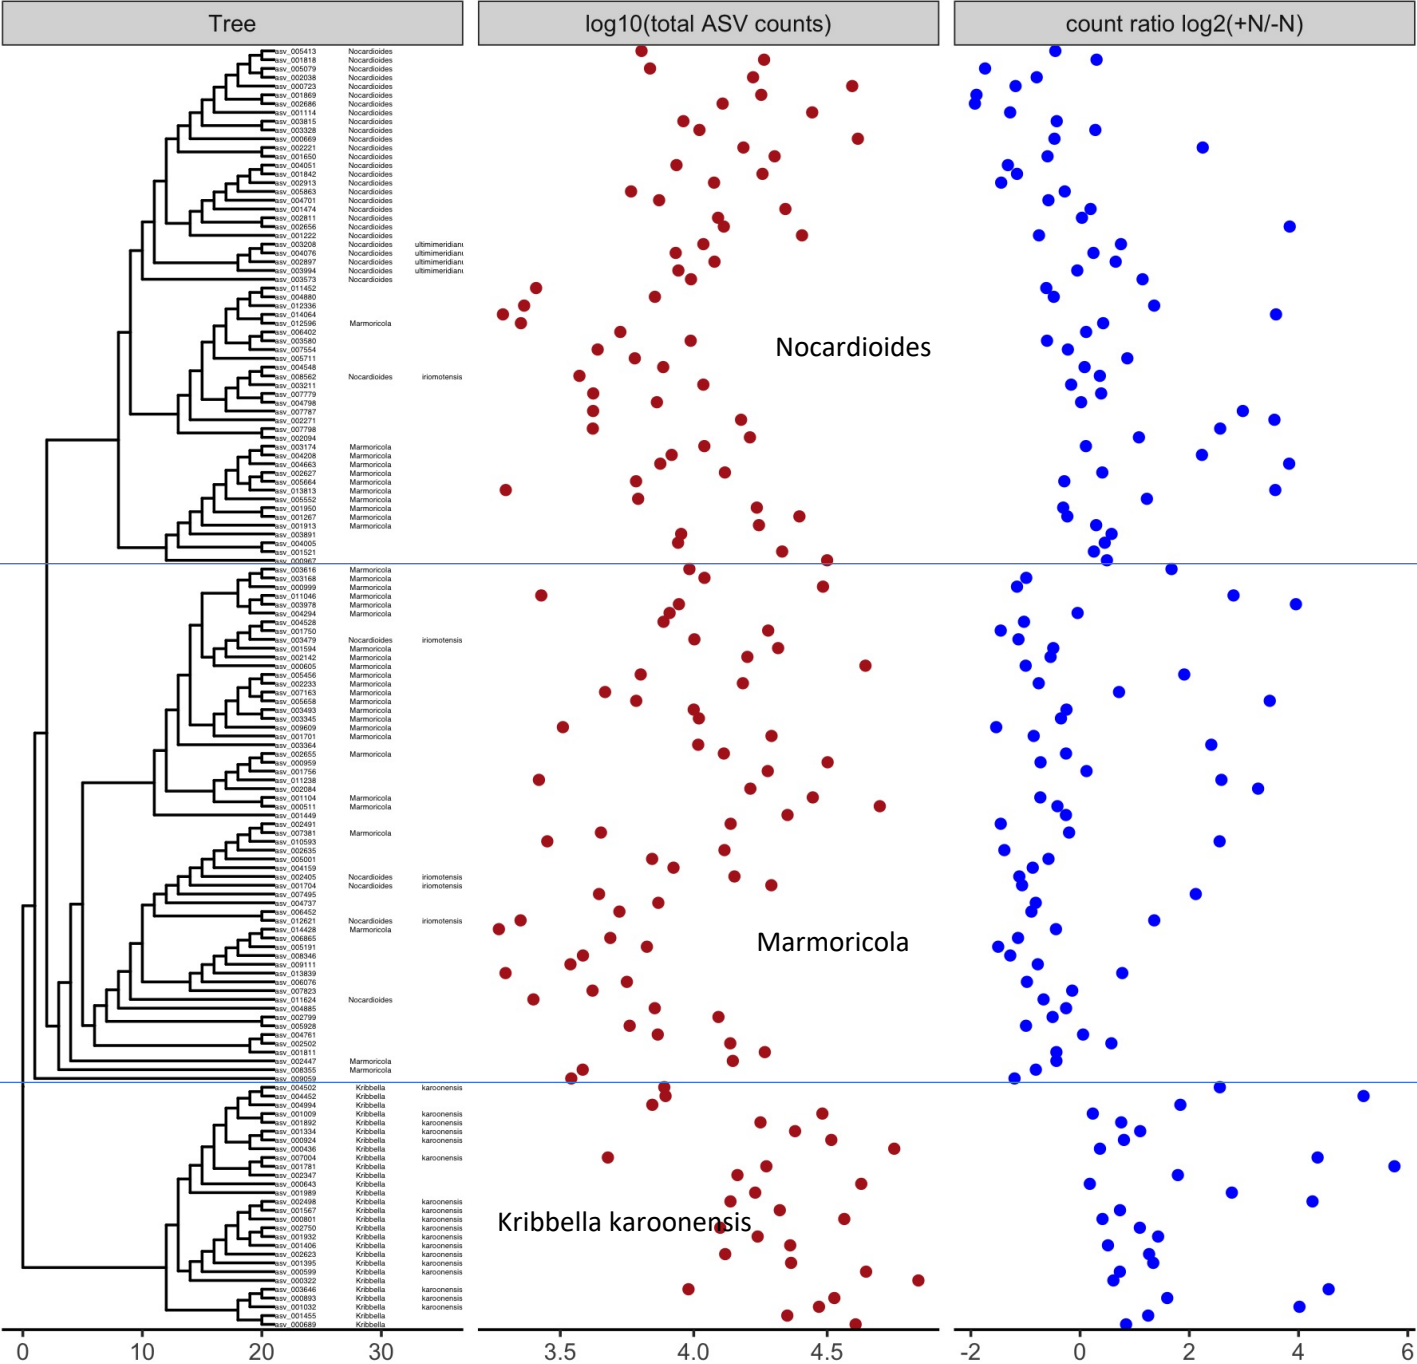

Comamonadaceae

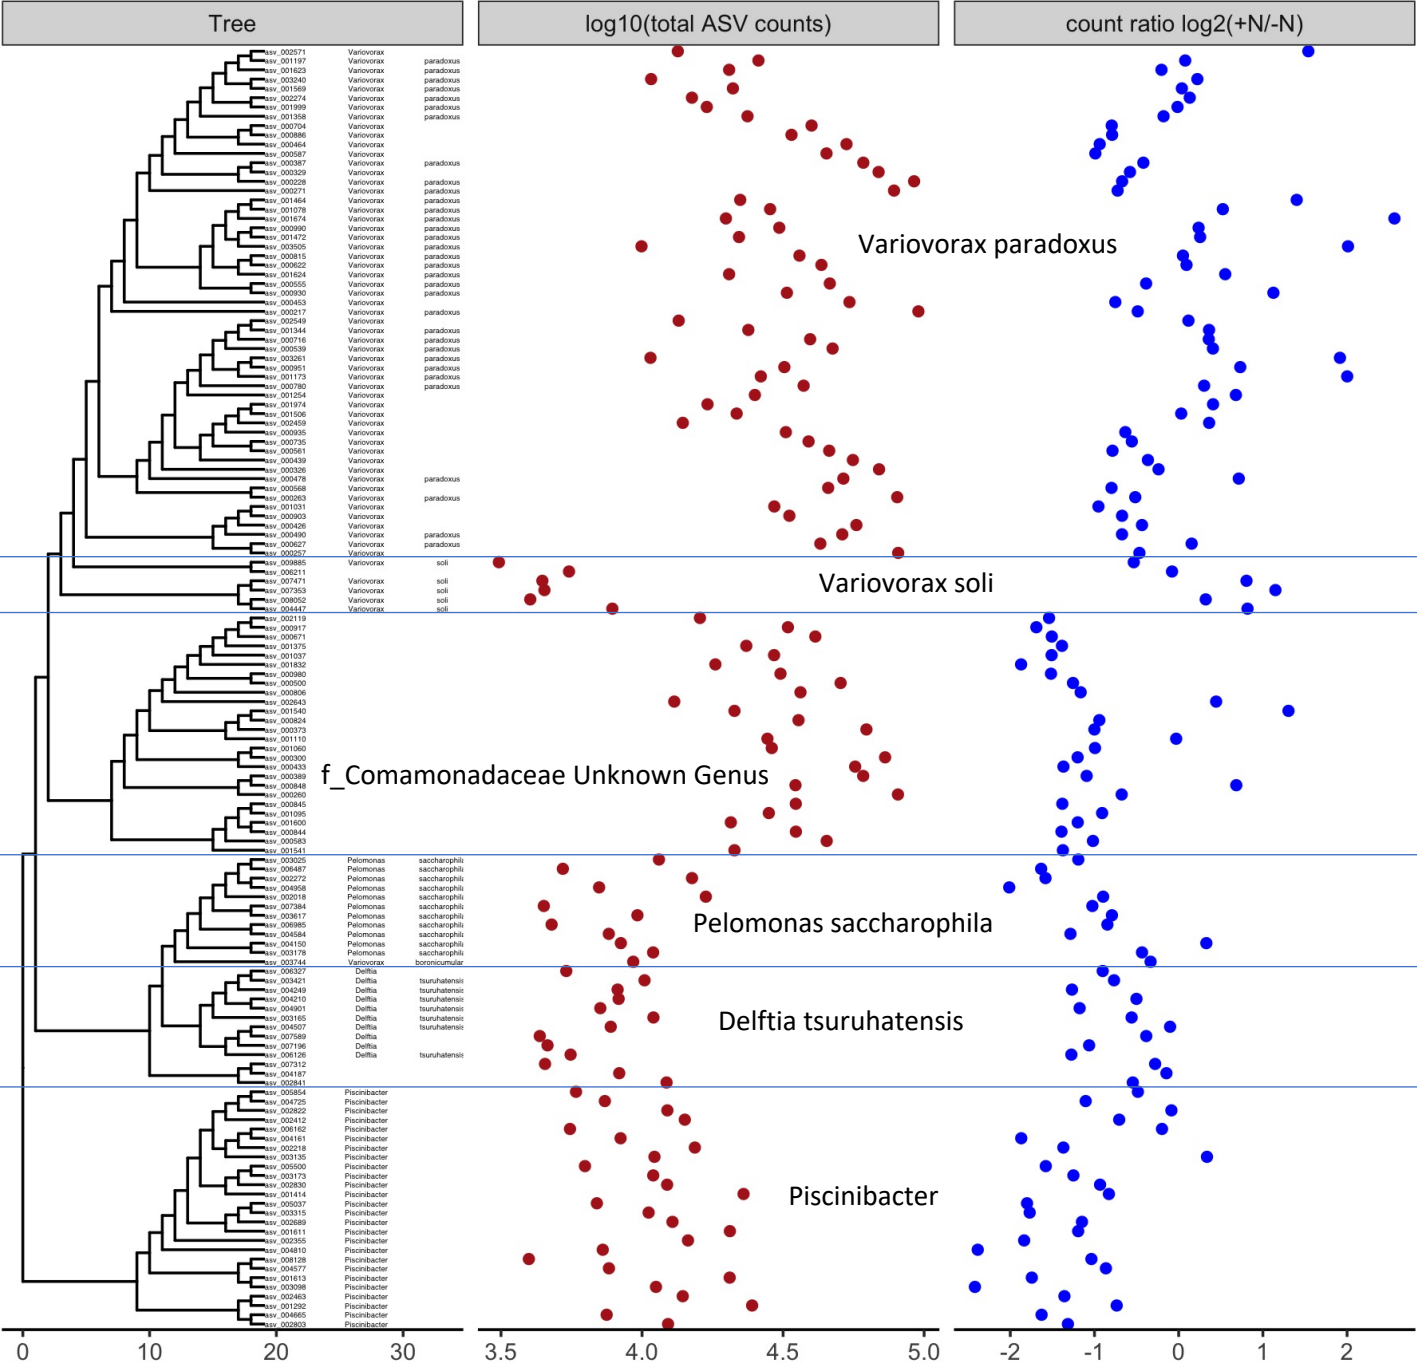

Nitrososphaeraceae

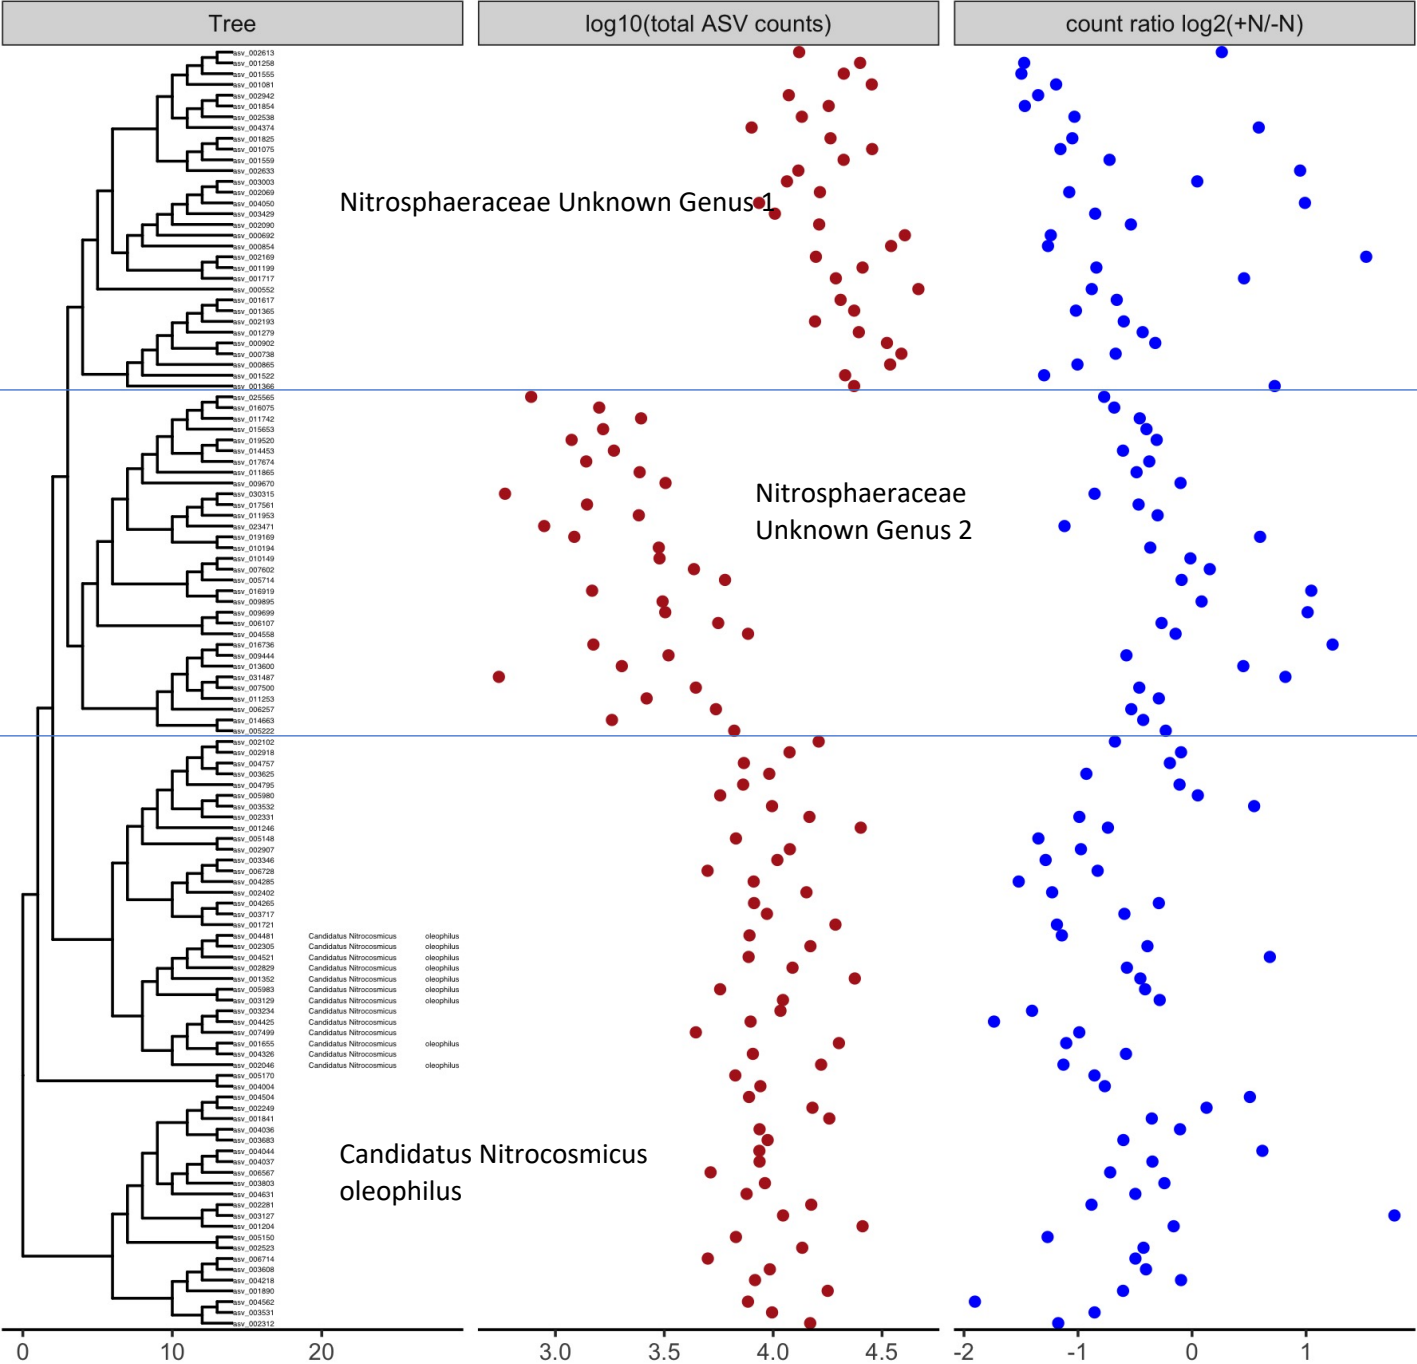

Streptomycetaceae

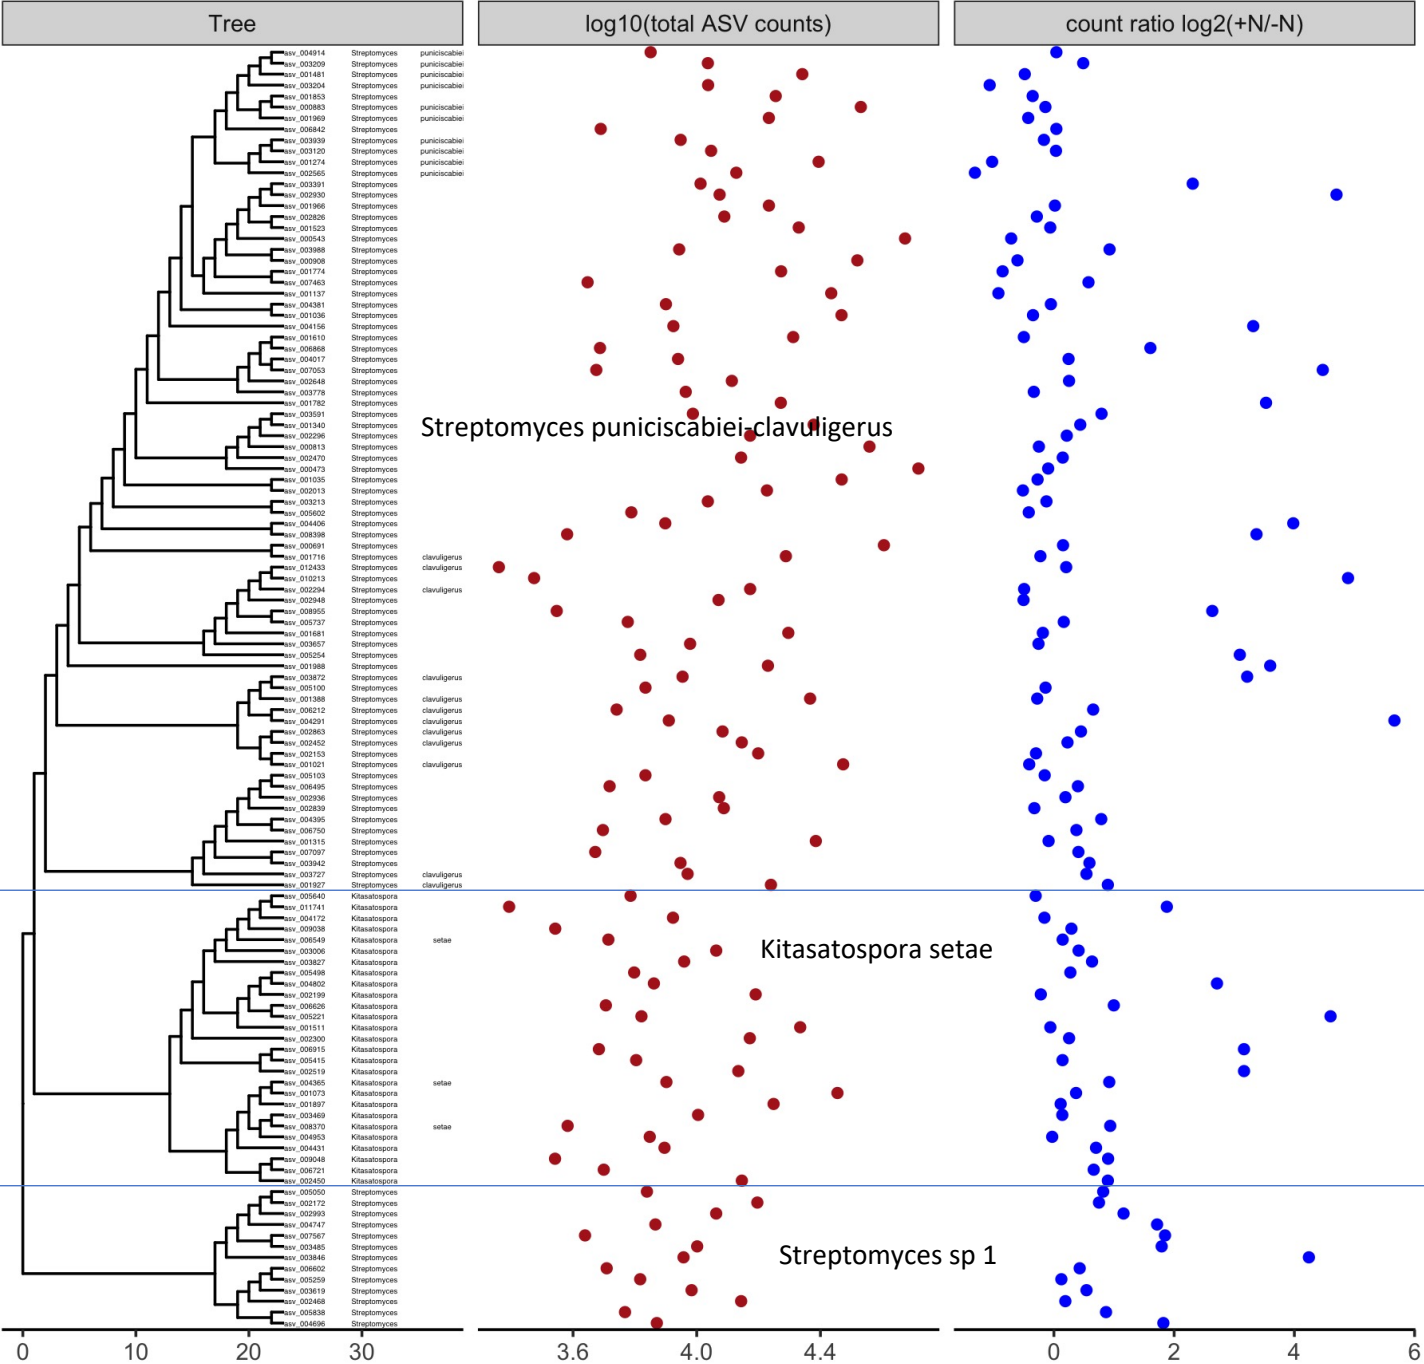



Xanthomonadaceae

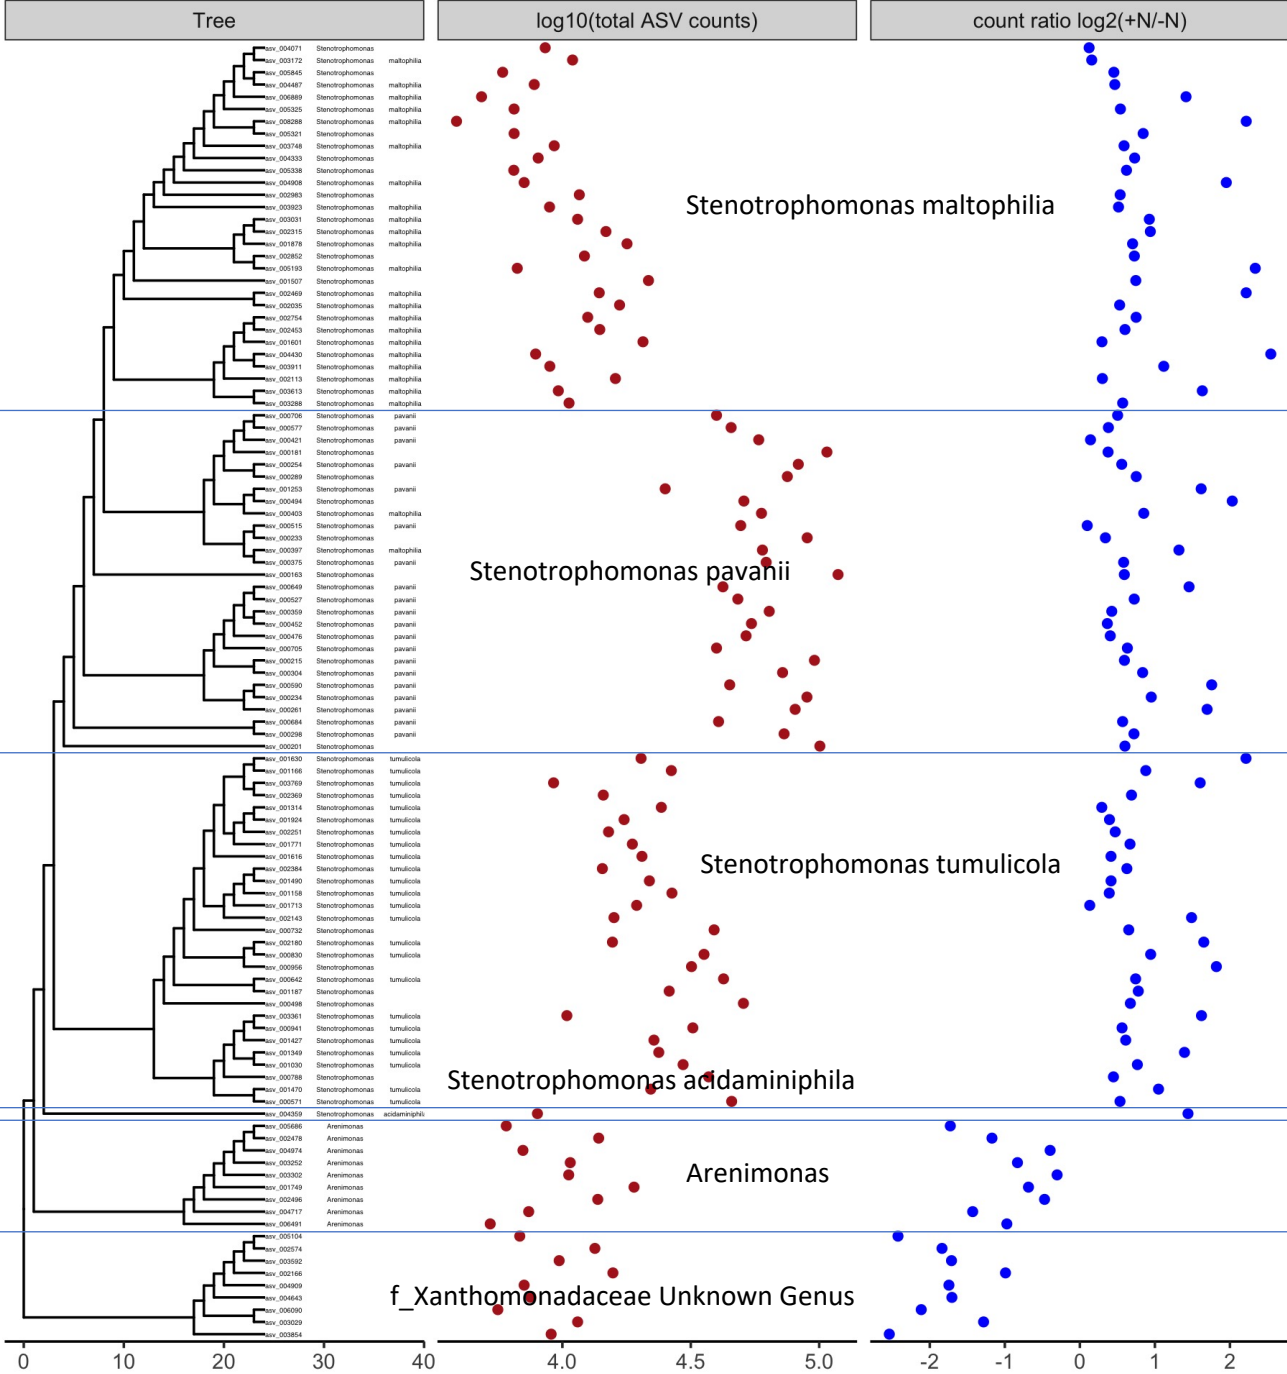

Chthoniobacteraceae

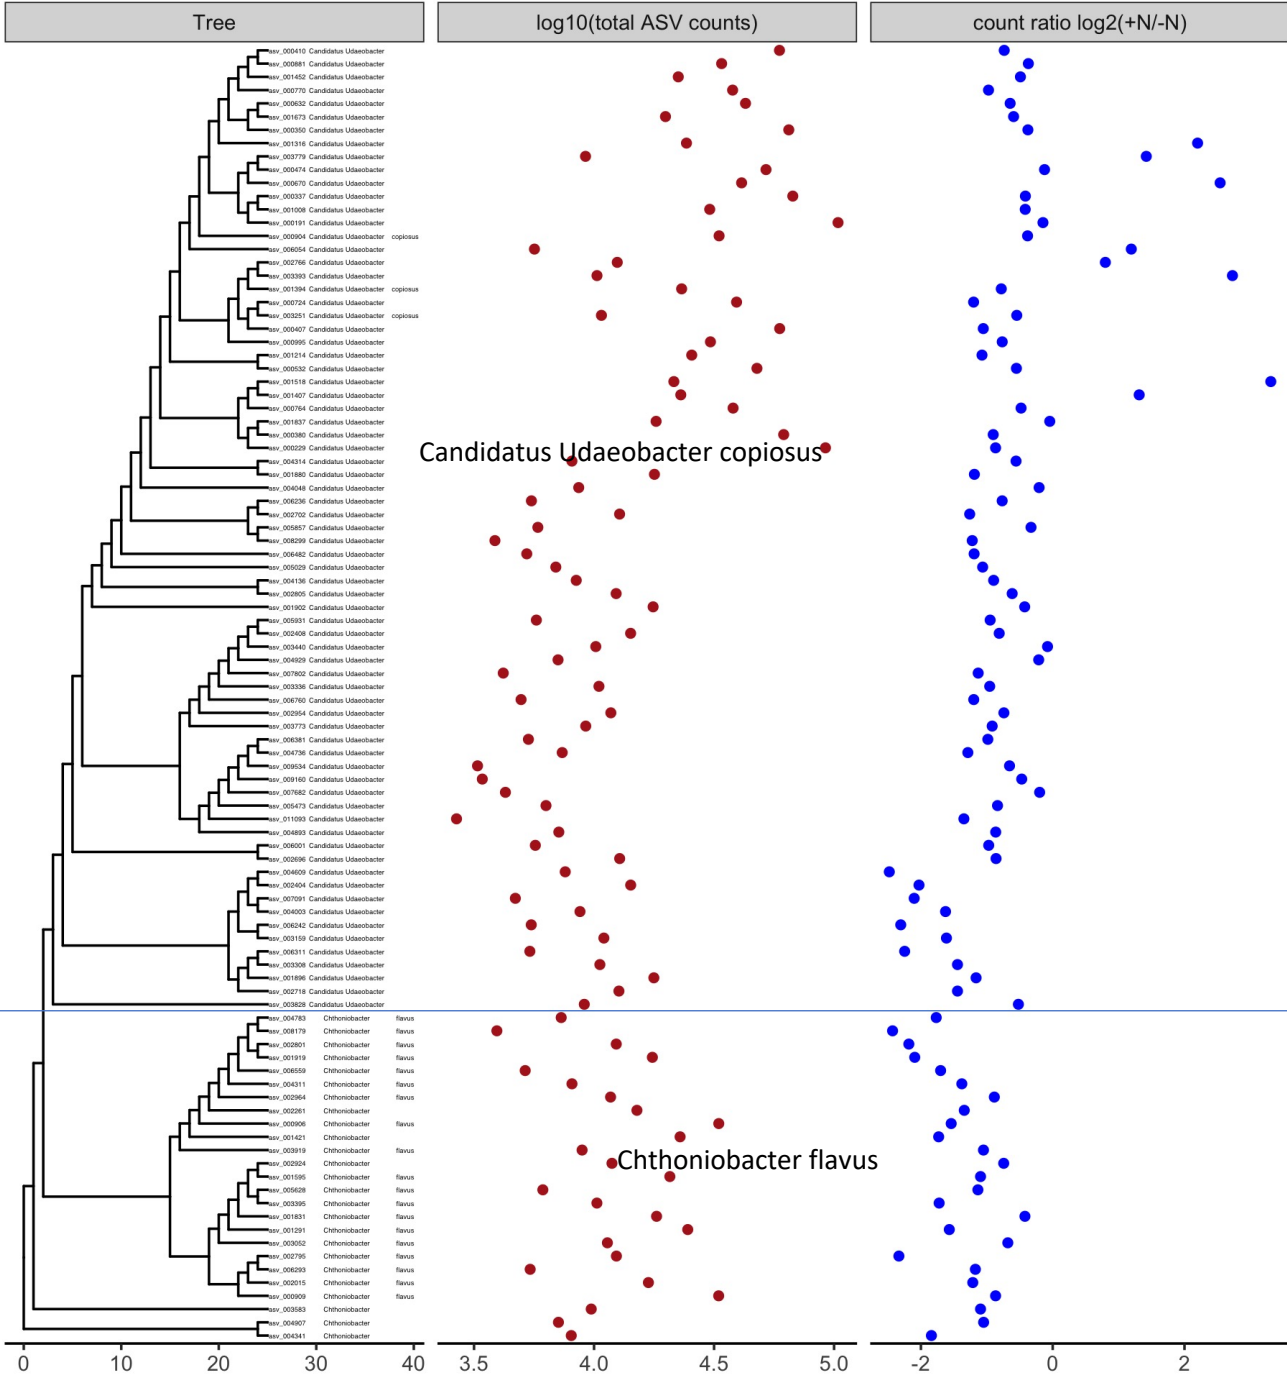

Rhodanobacteraceae

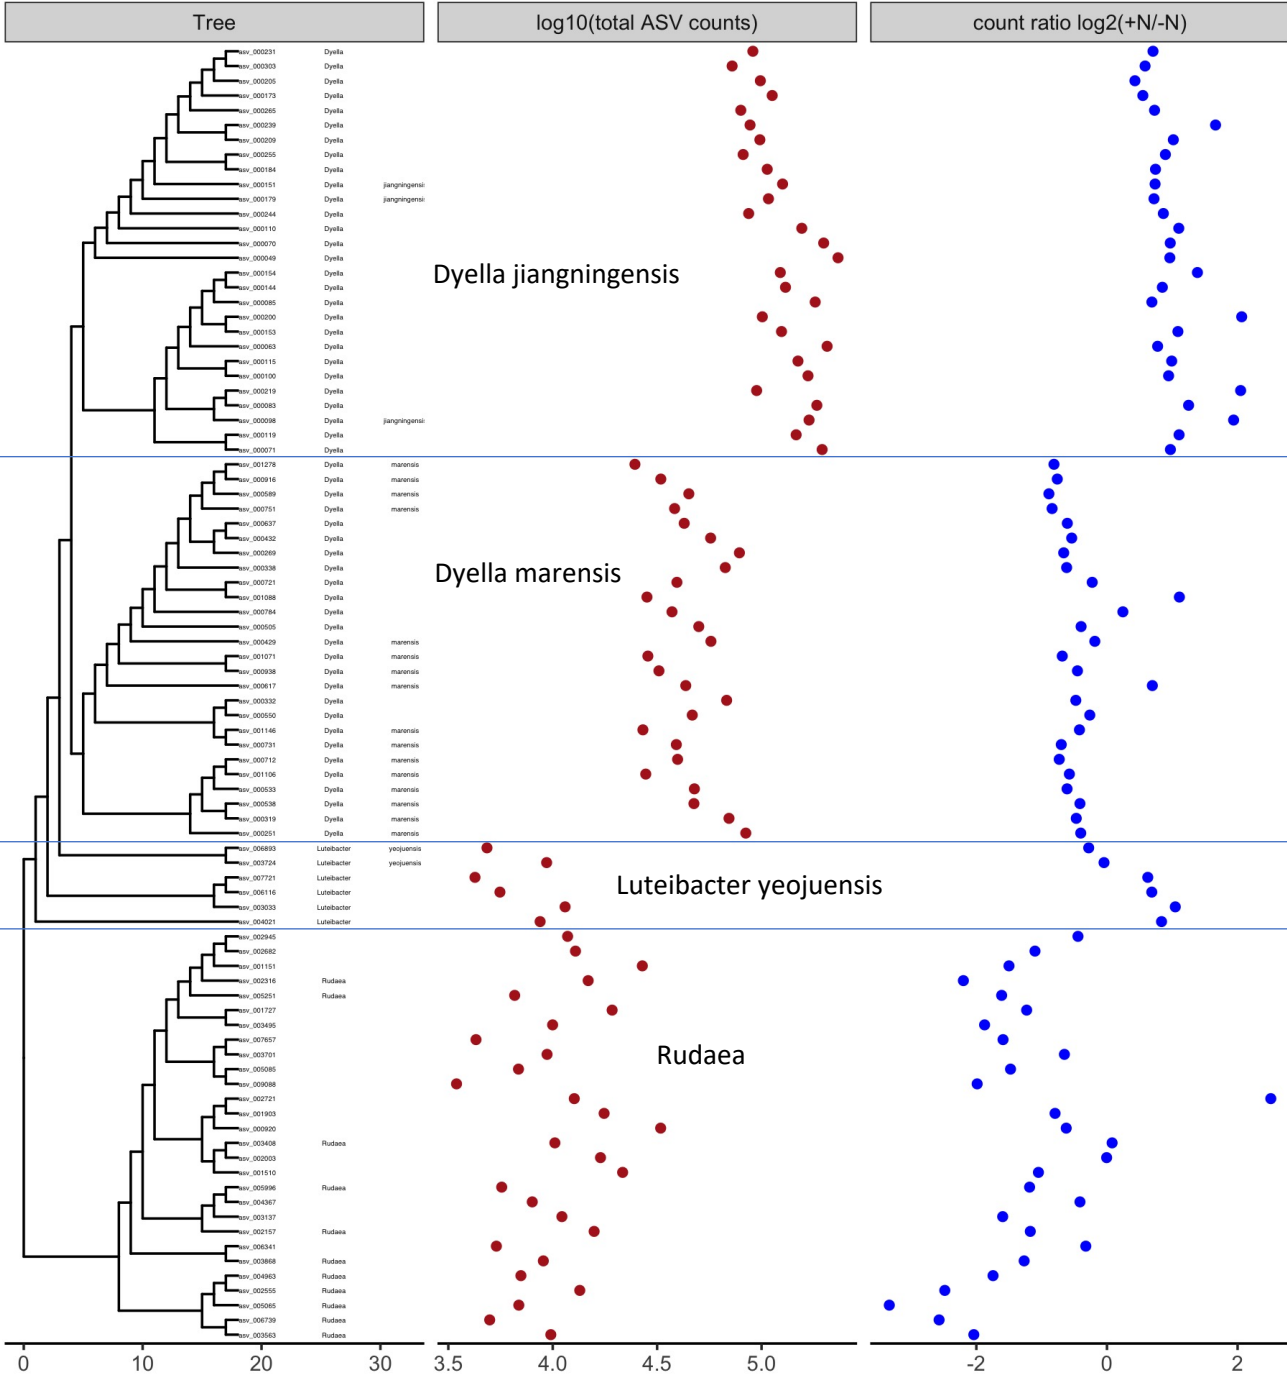

Moraxellaceae

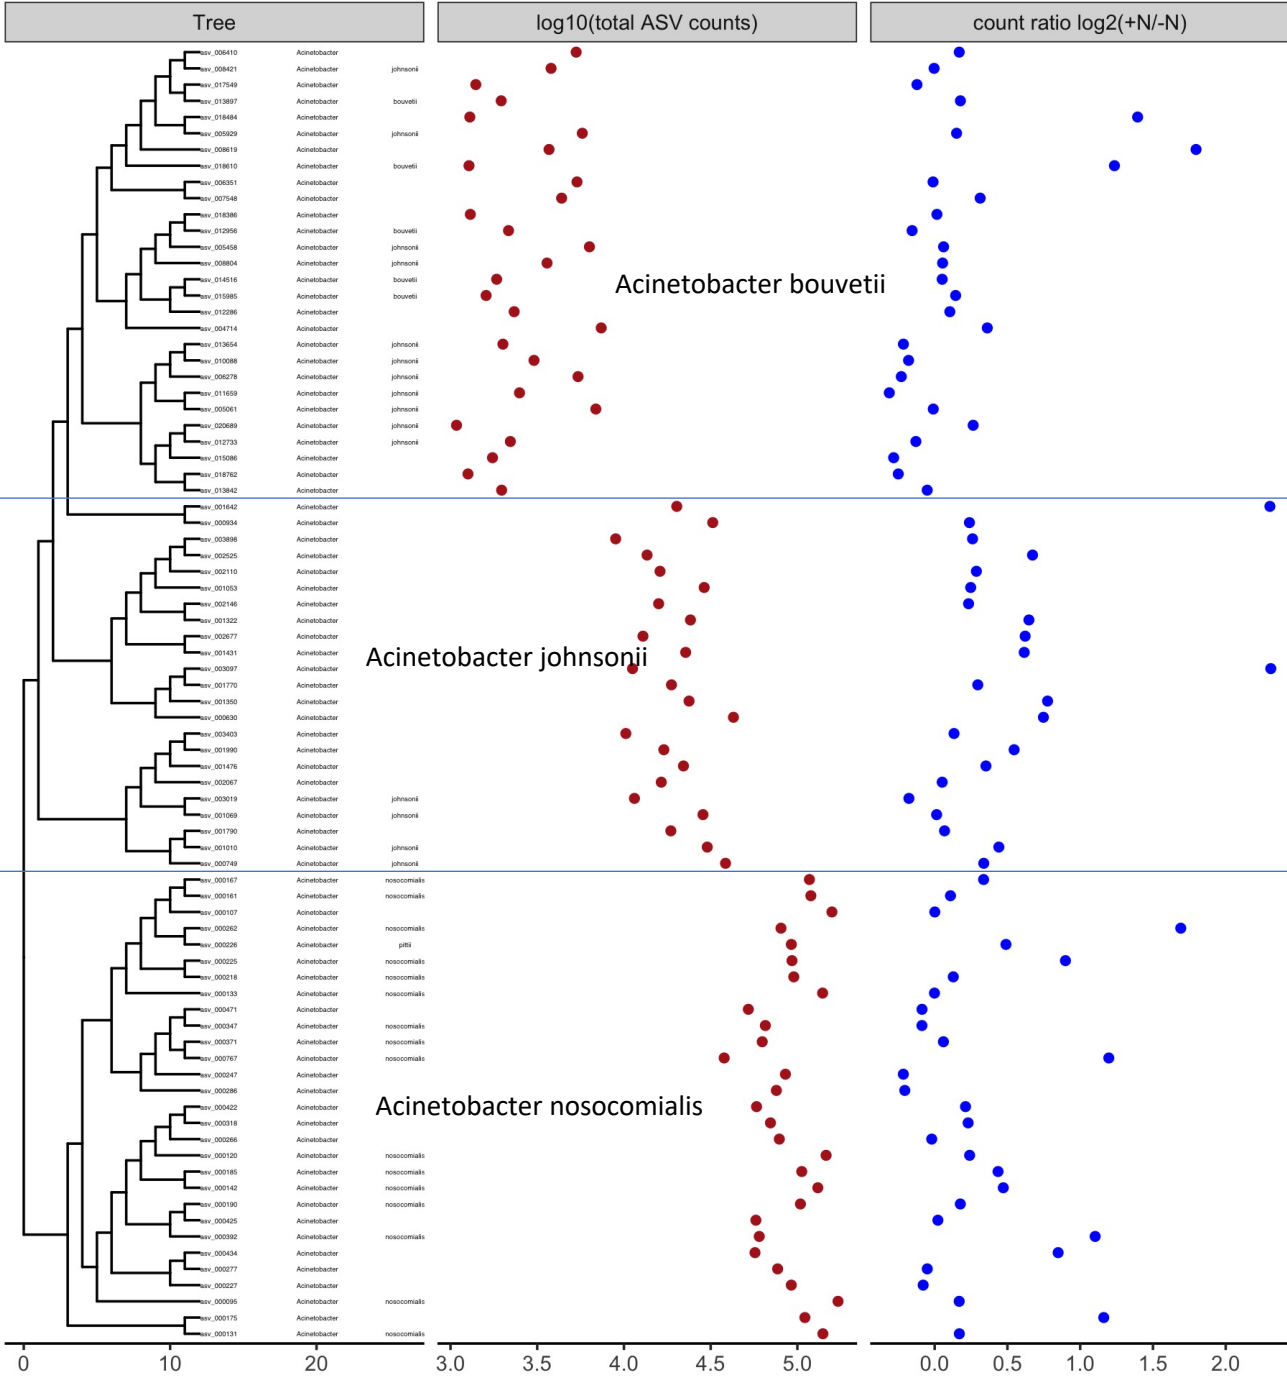



Bacillaceae

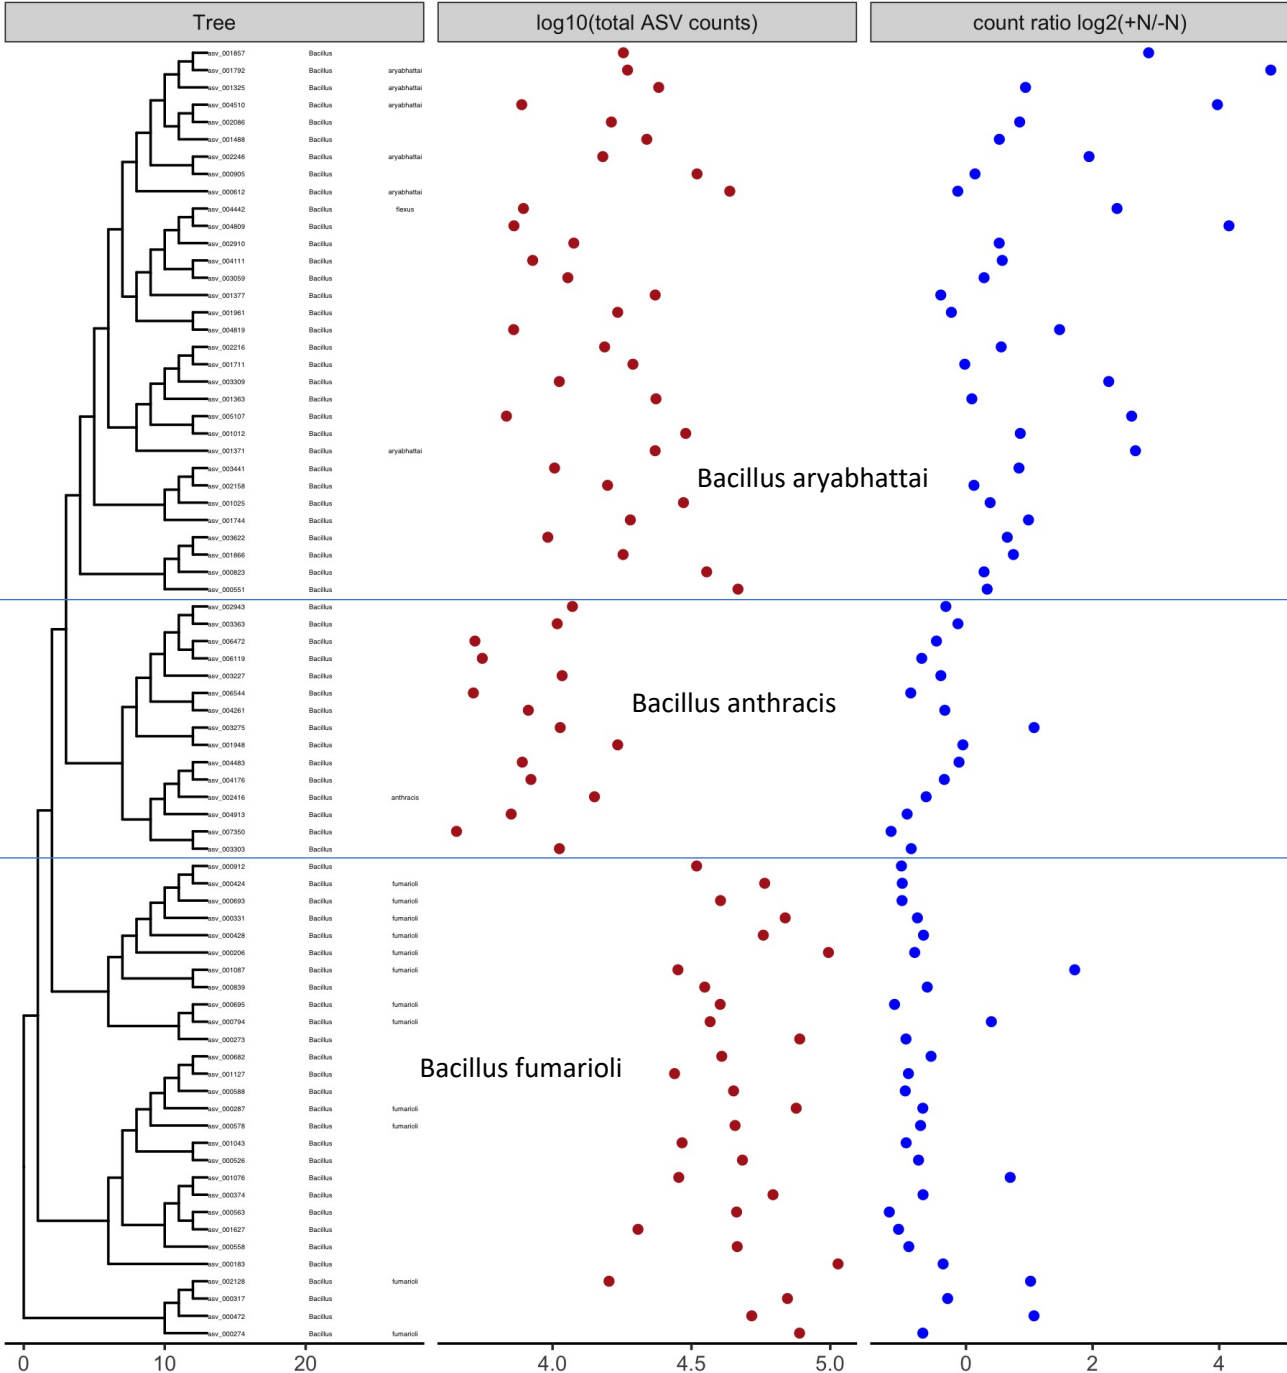

Spirosomaceae

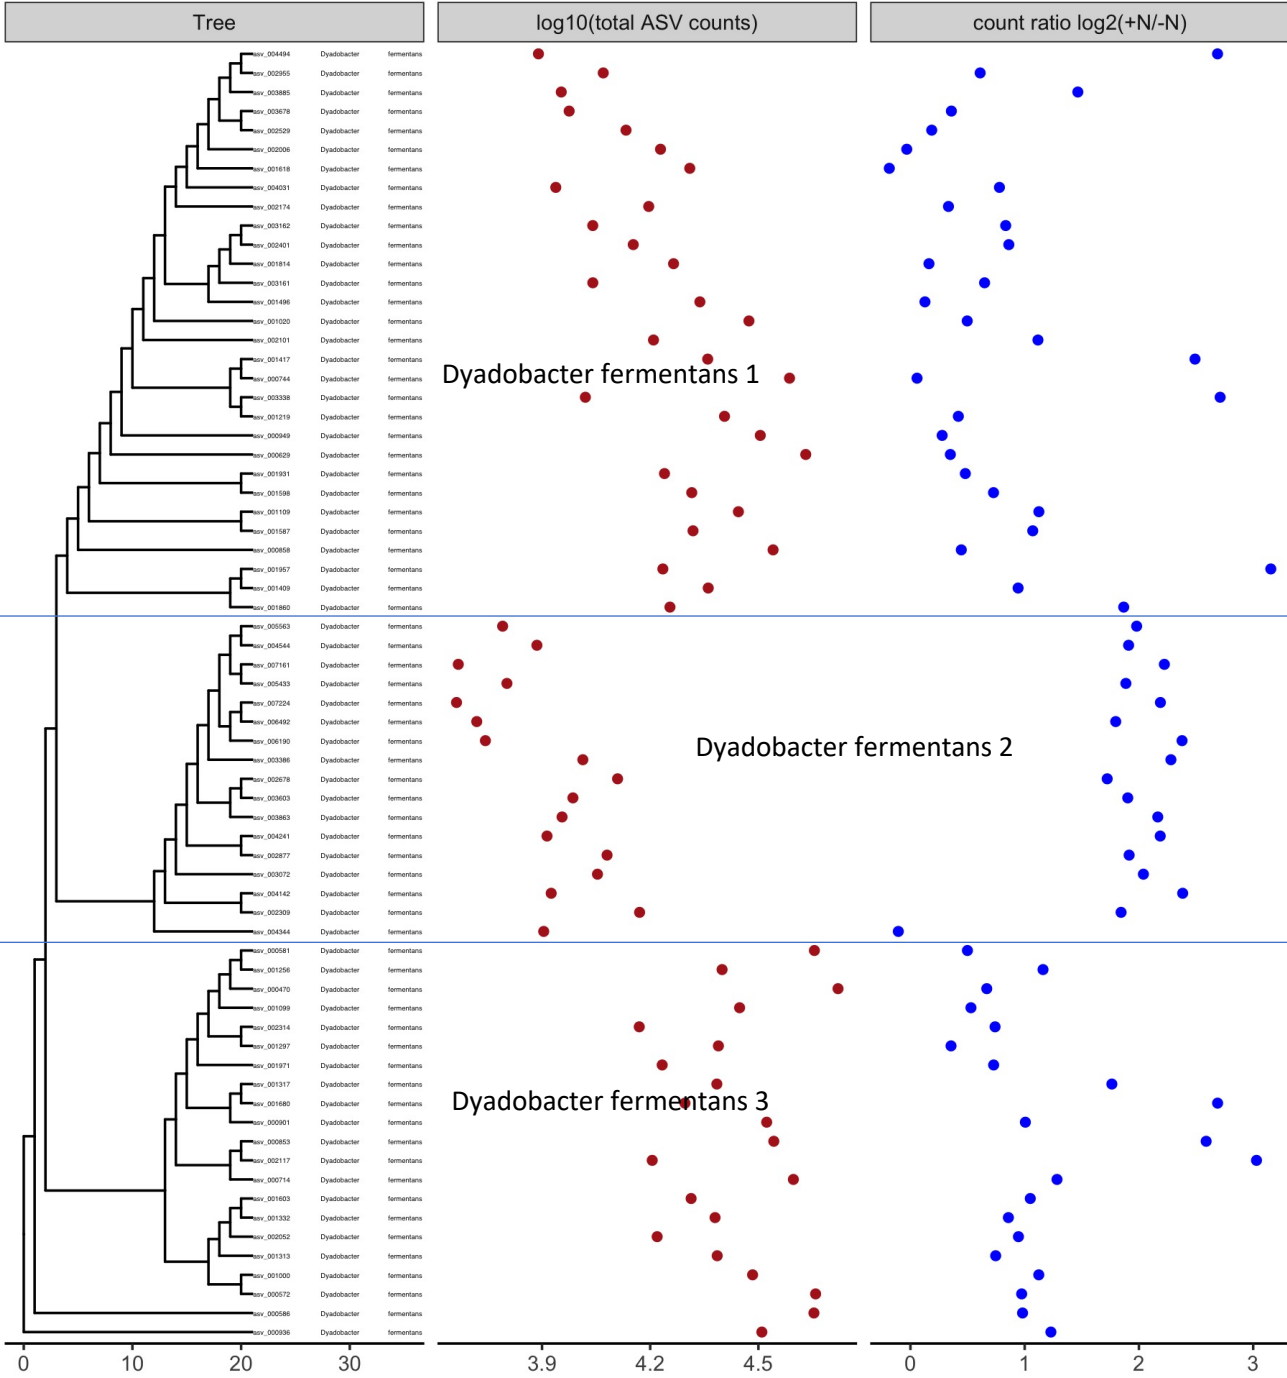

# Microbacteriaceae

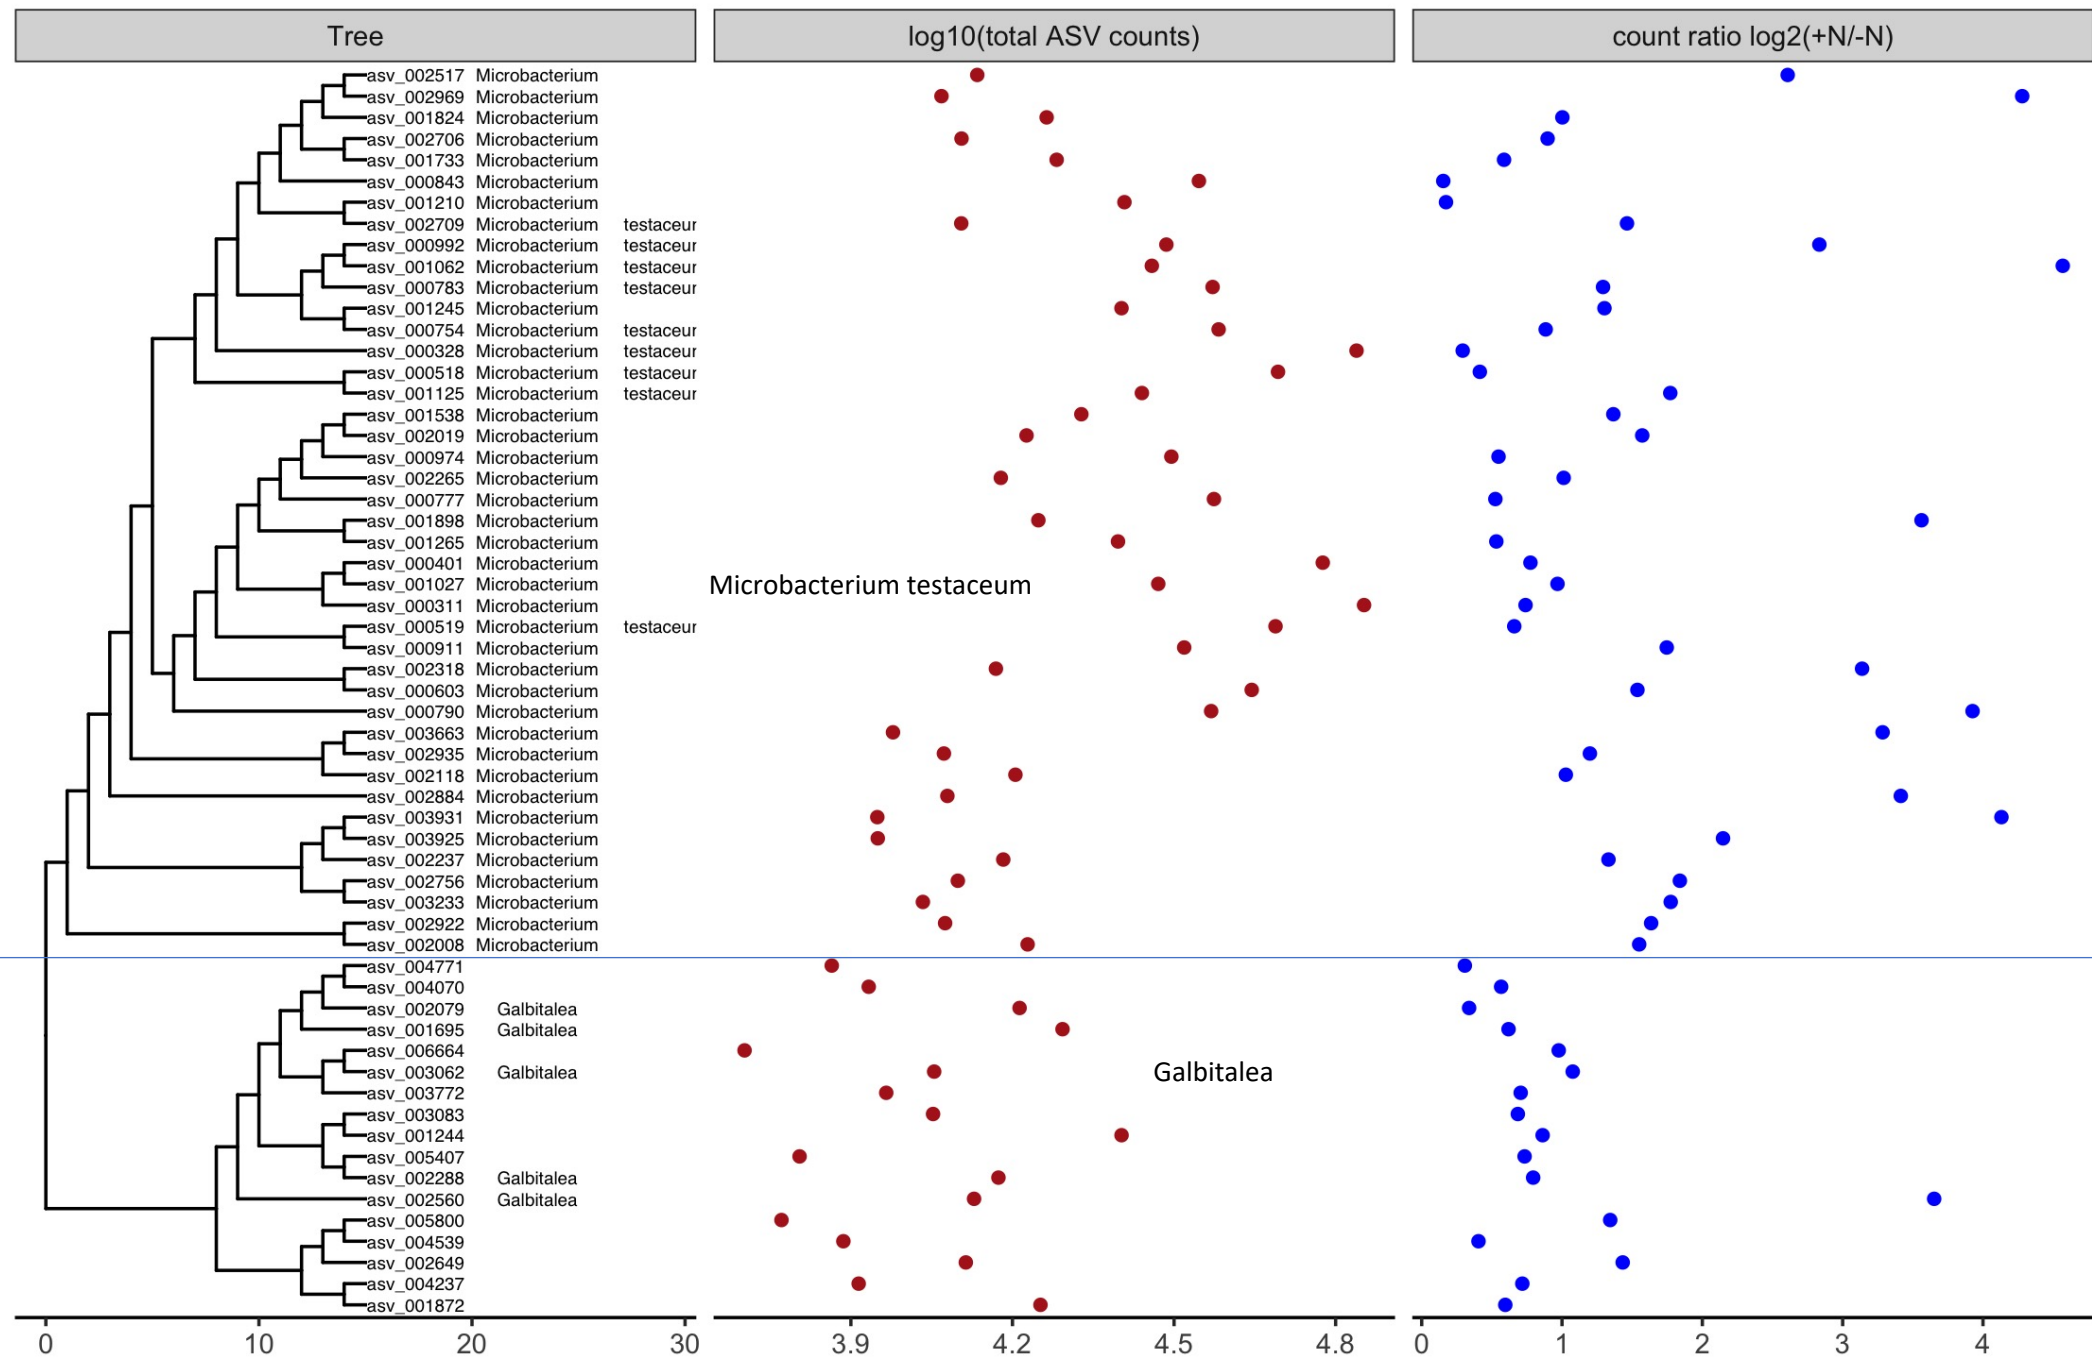

# Pyrinomonadaceae

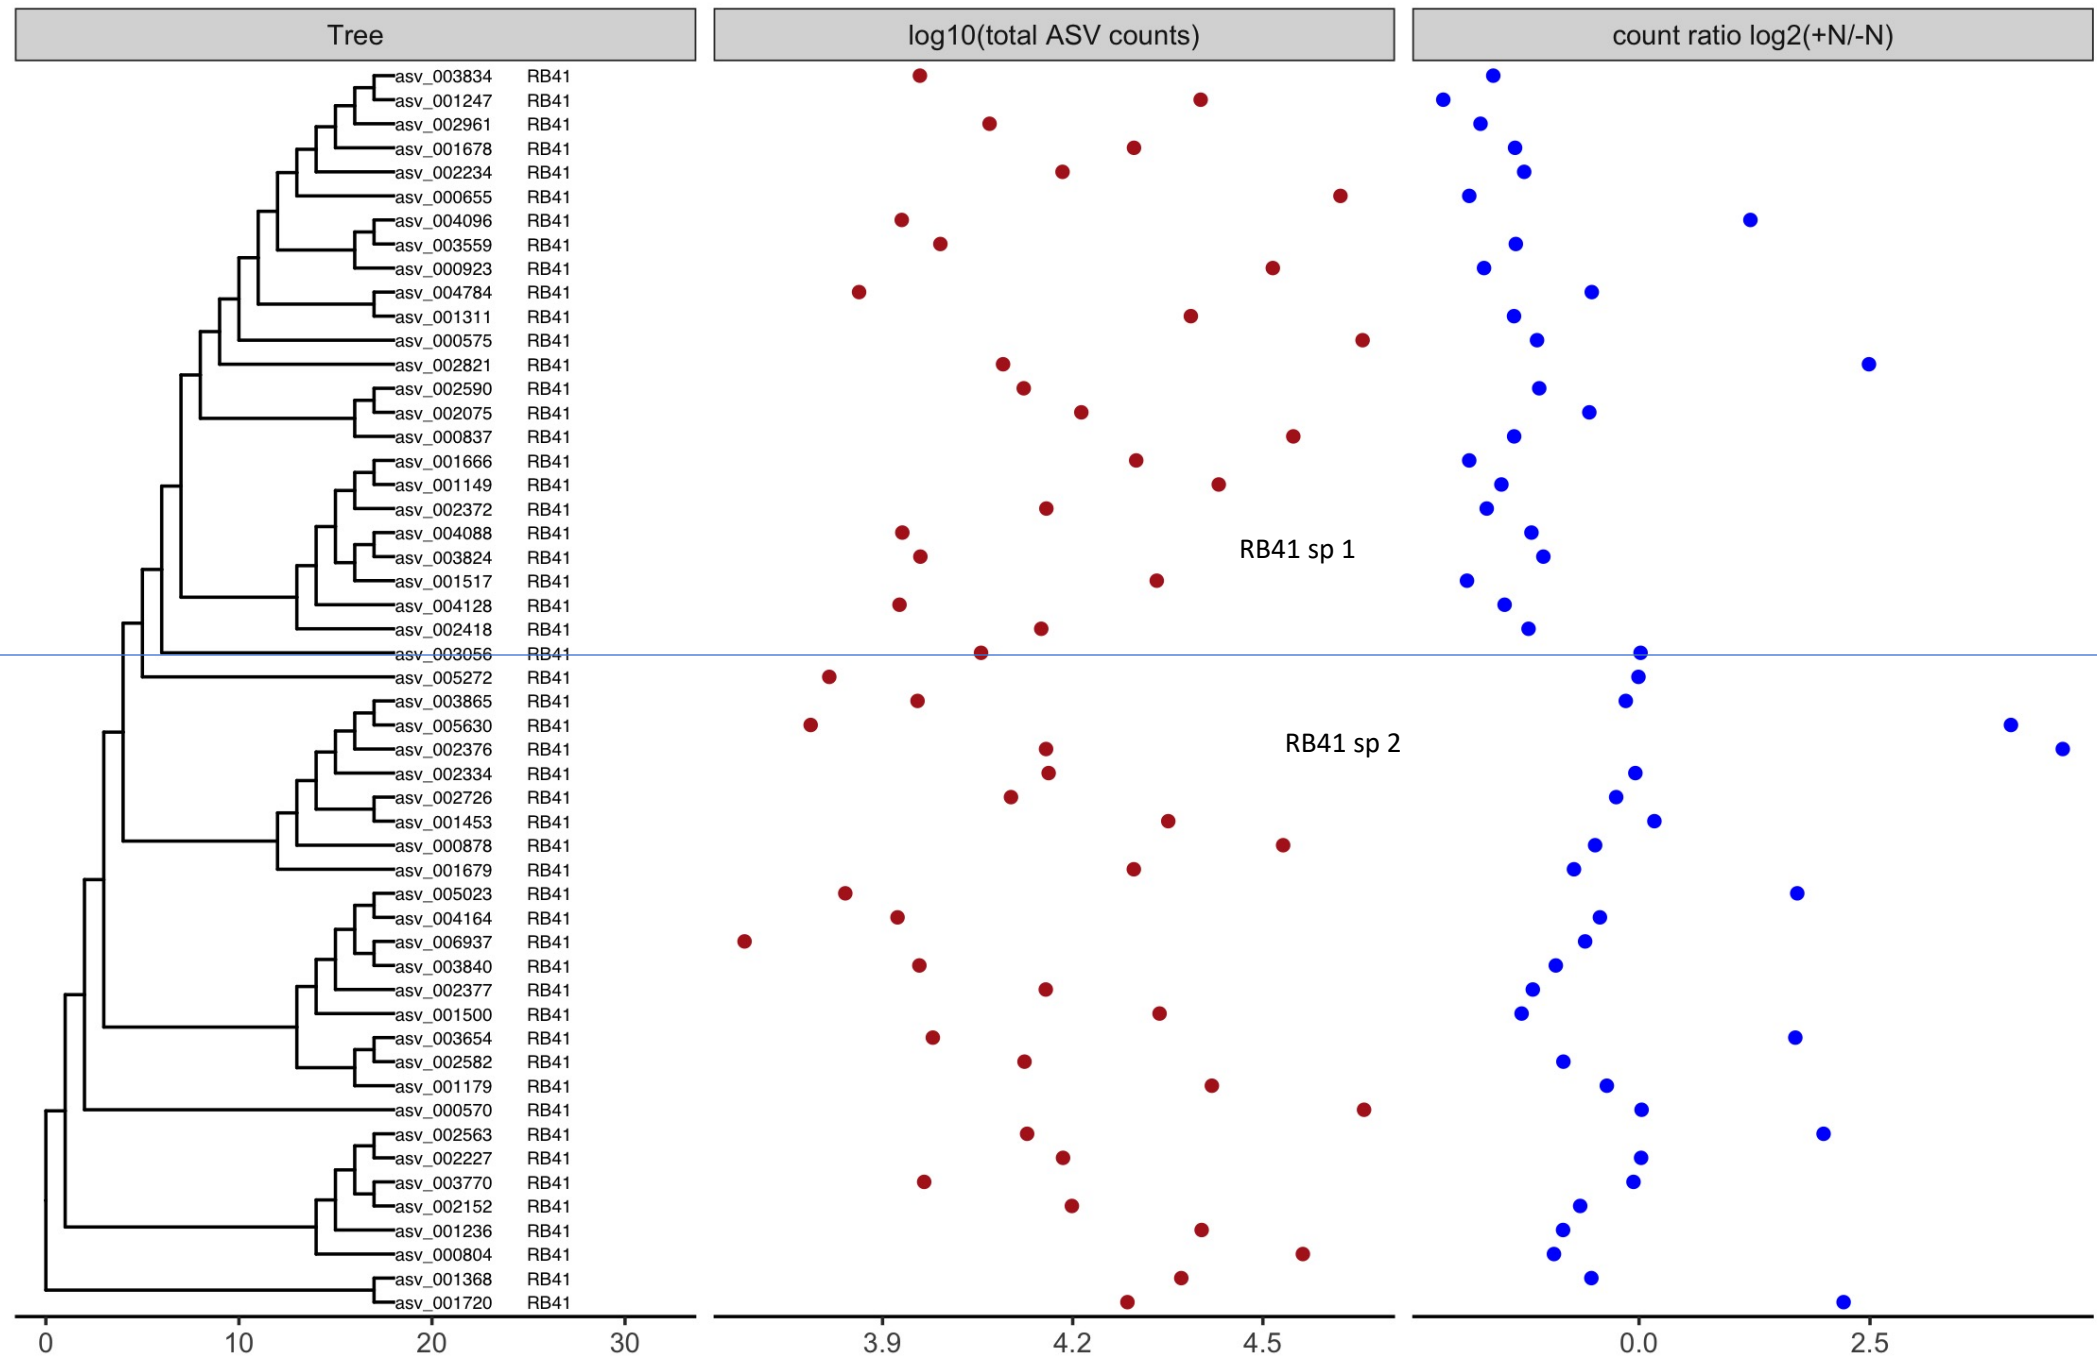



## Enterobacteriaceae

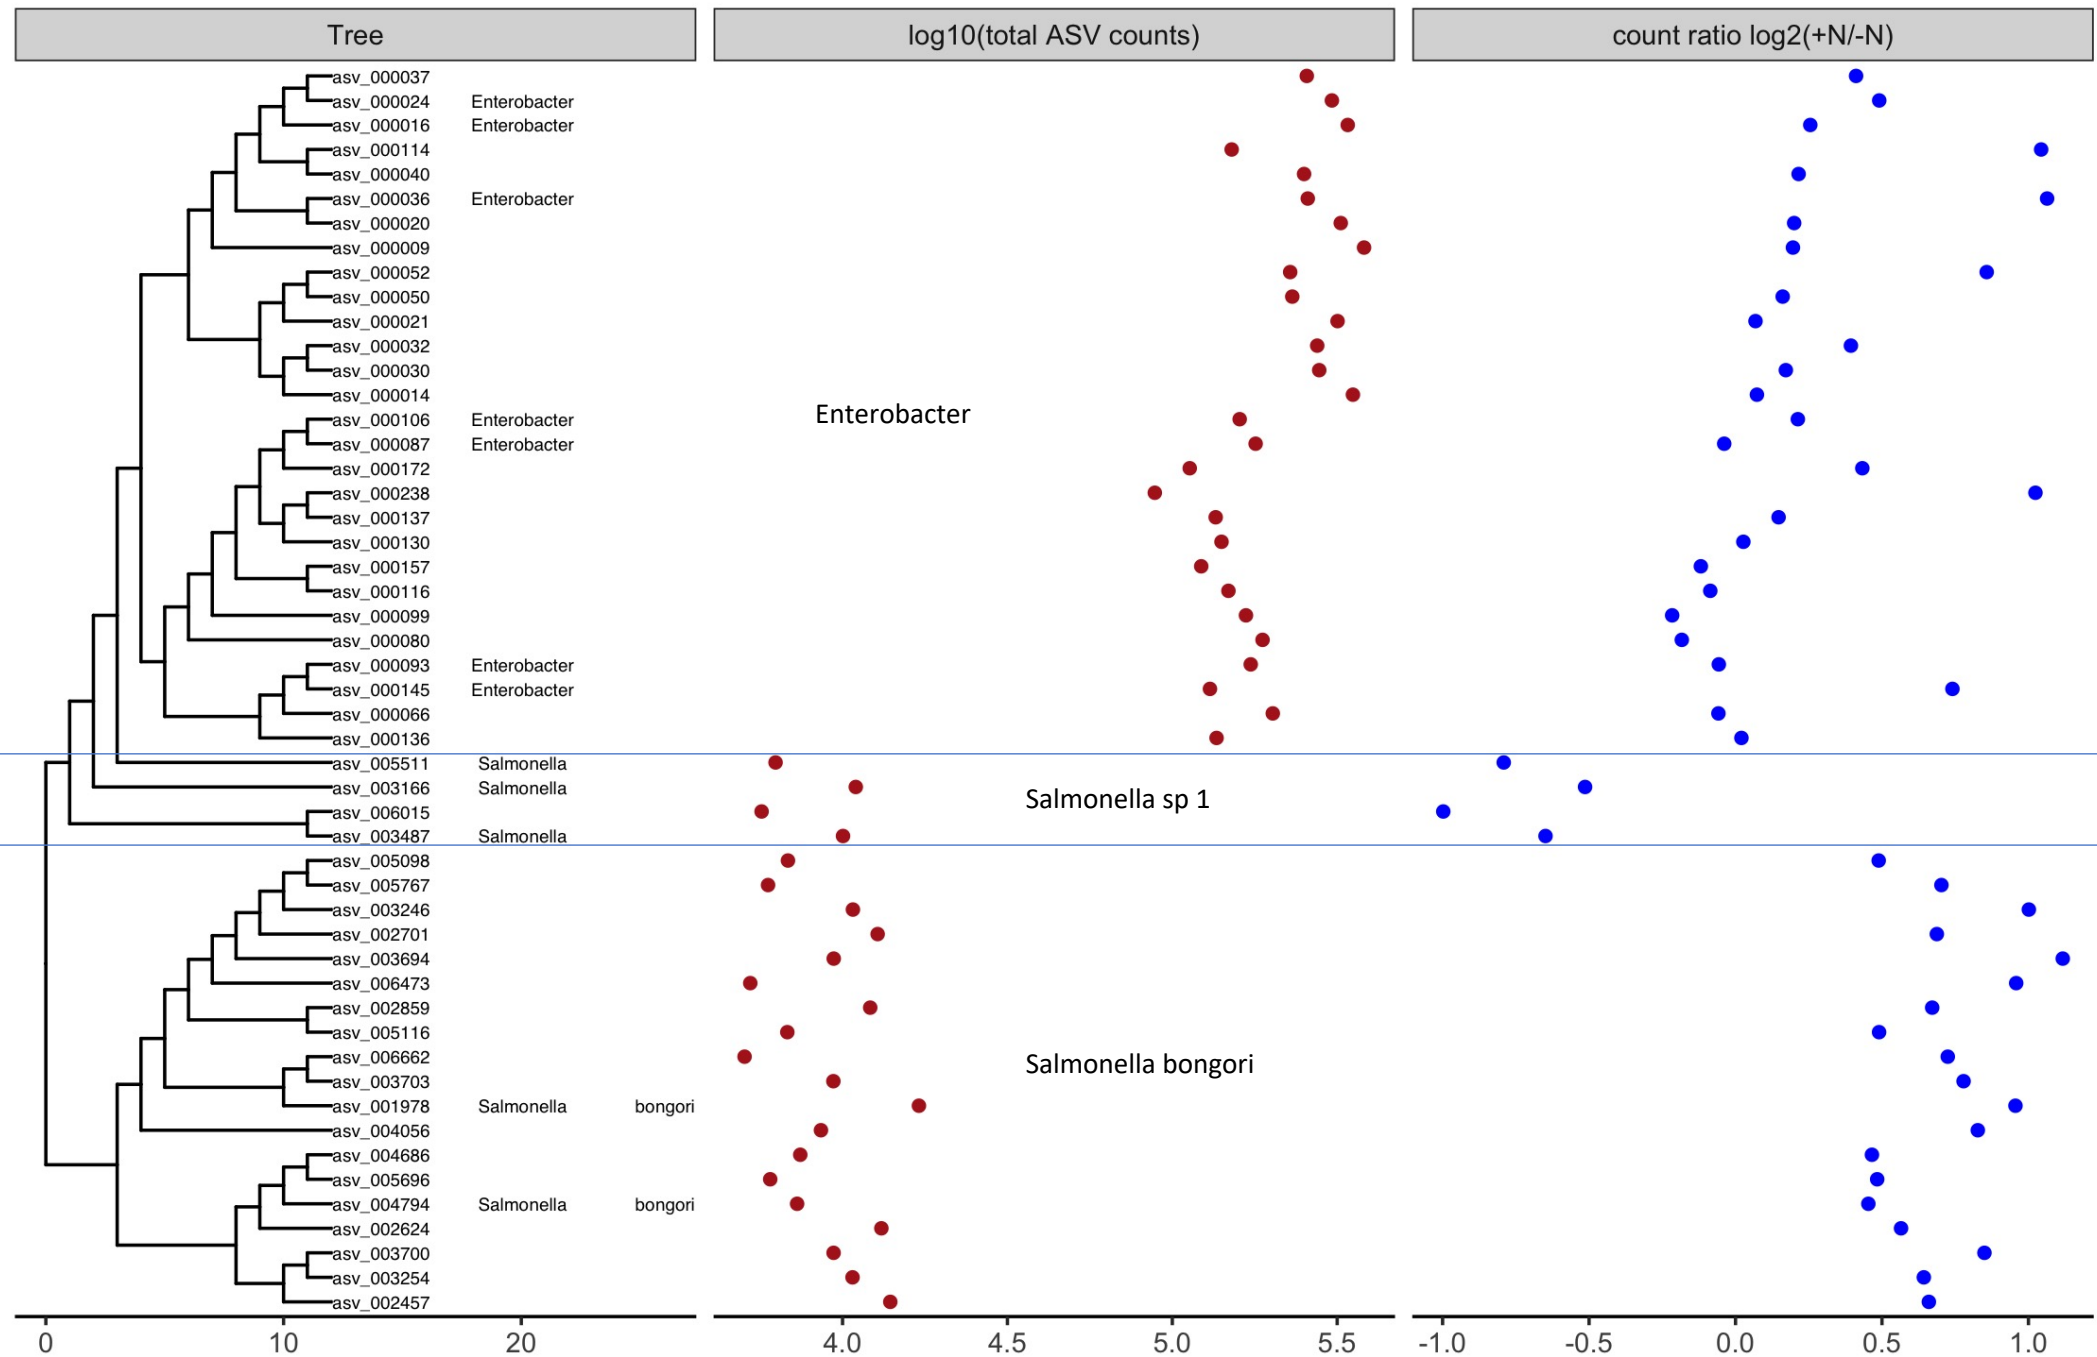

# Xanthobacteraceae

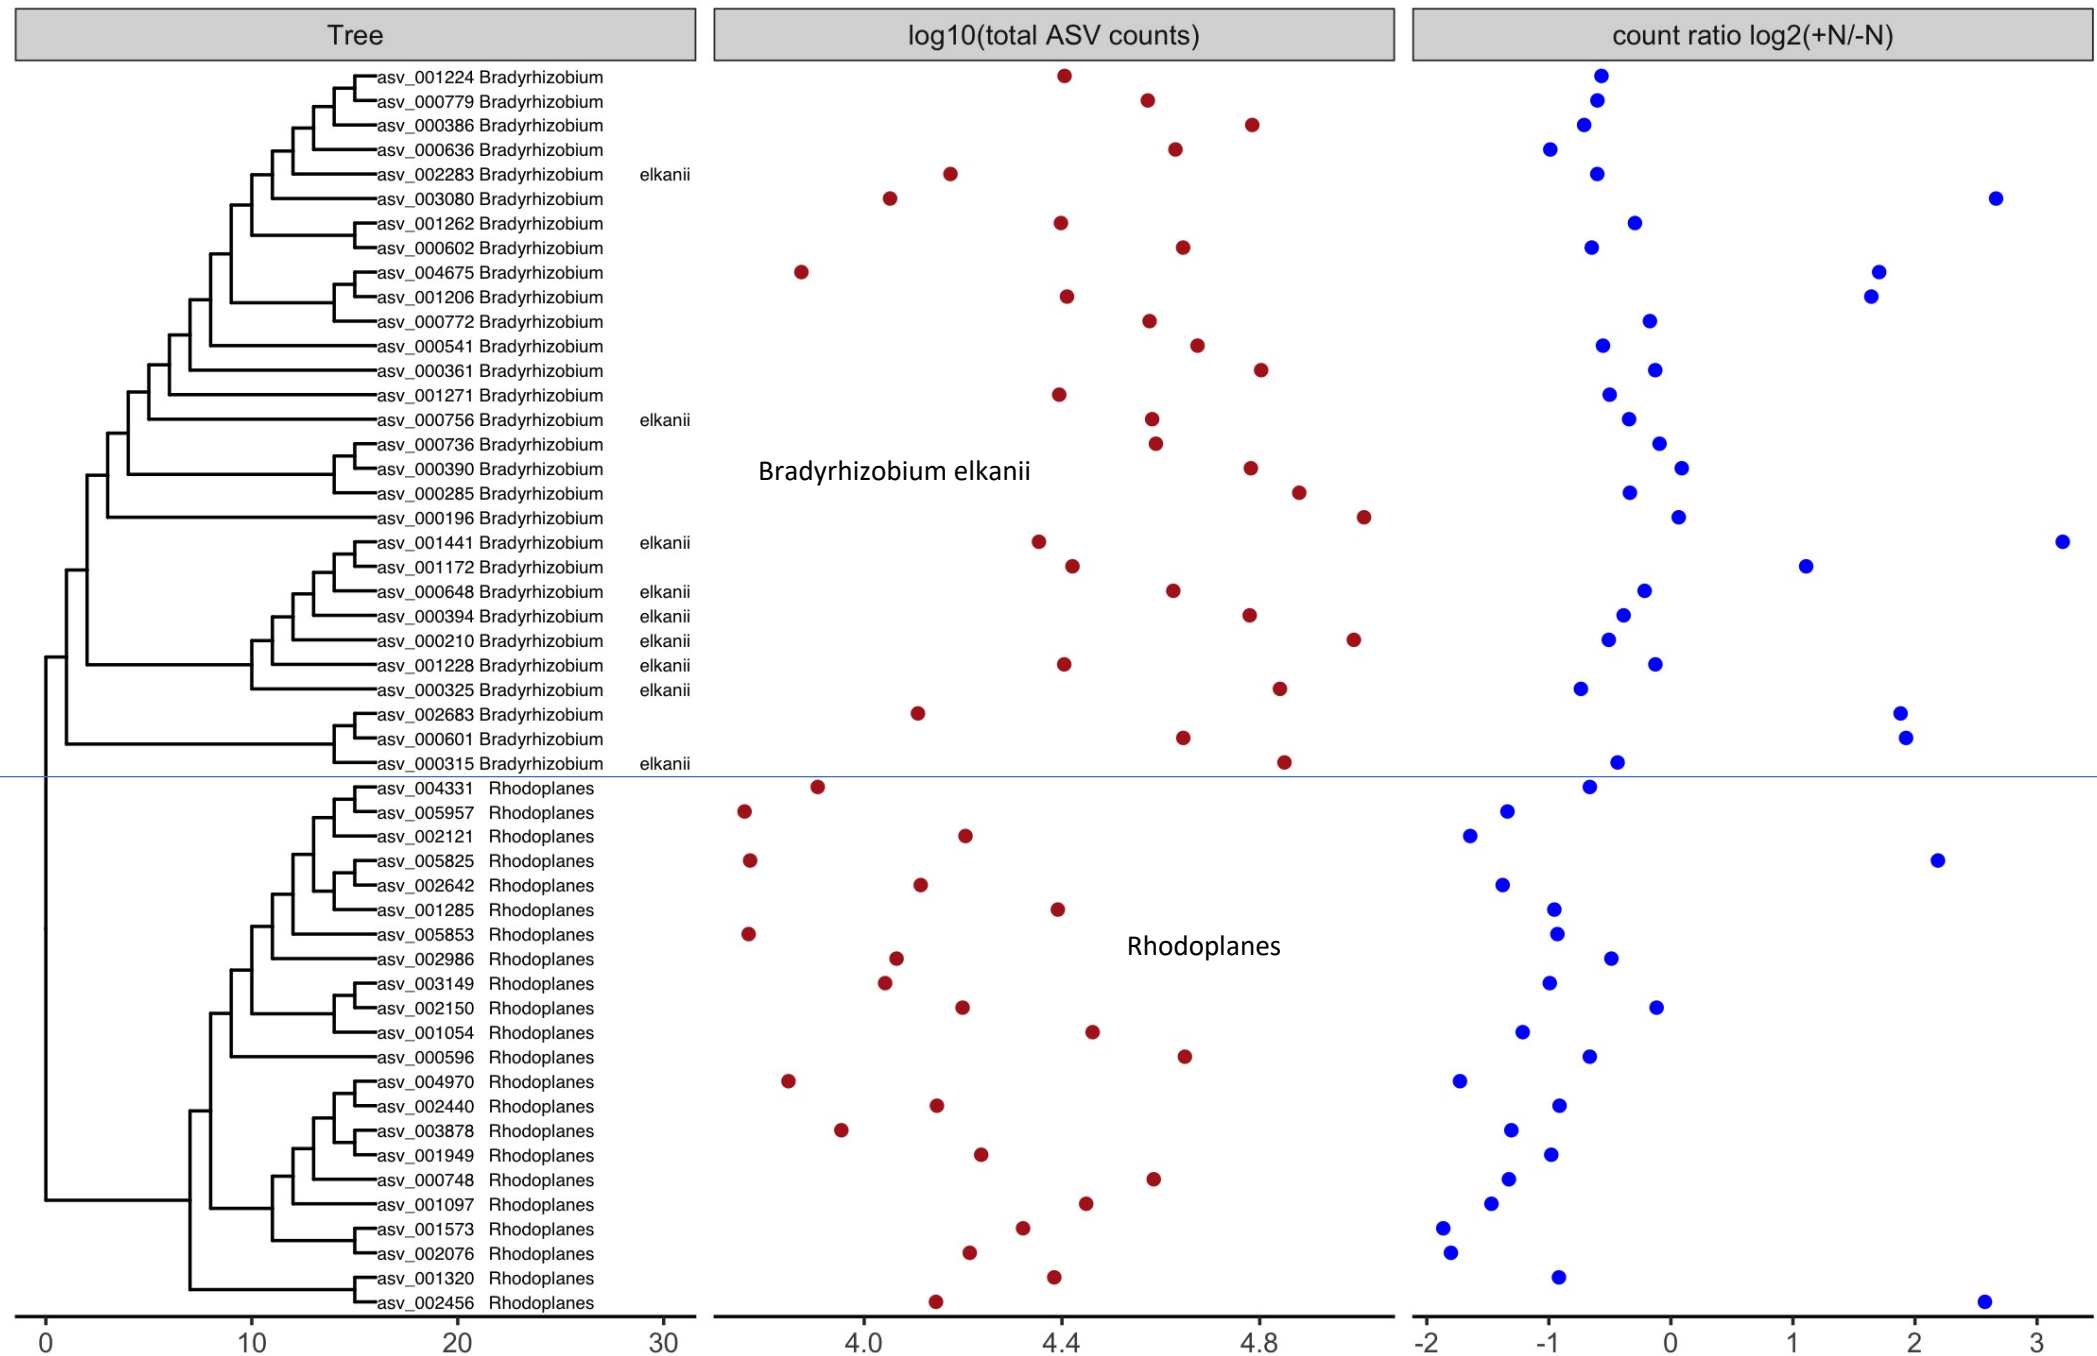

# Micrococcaceae

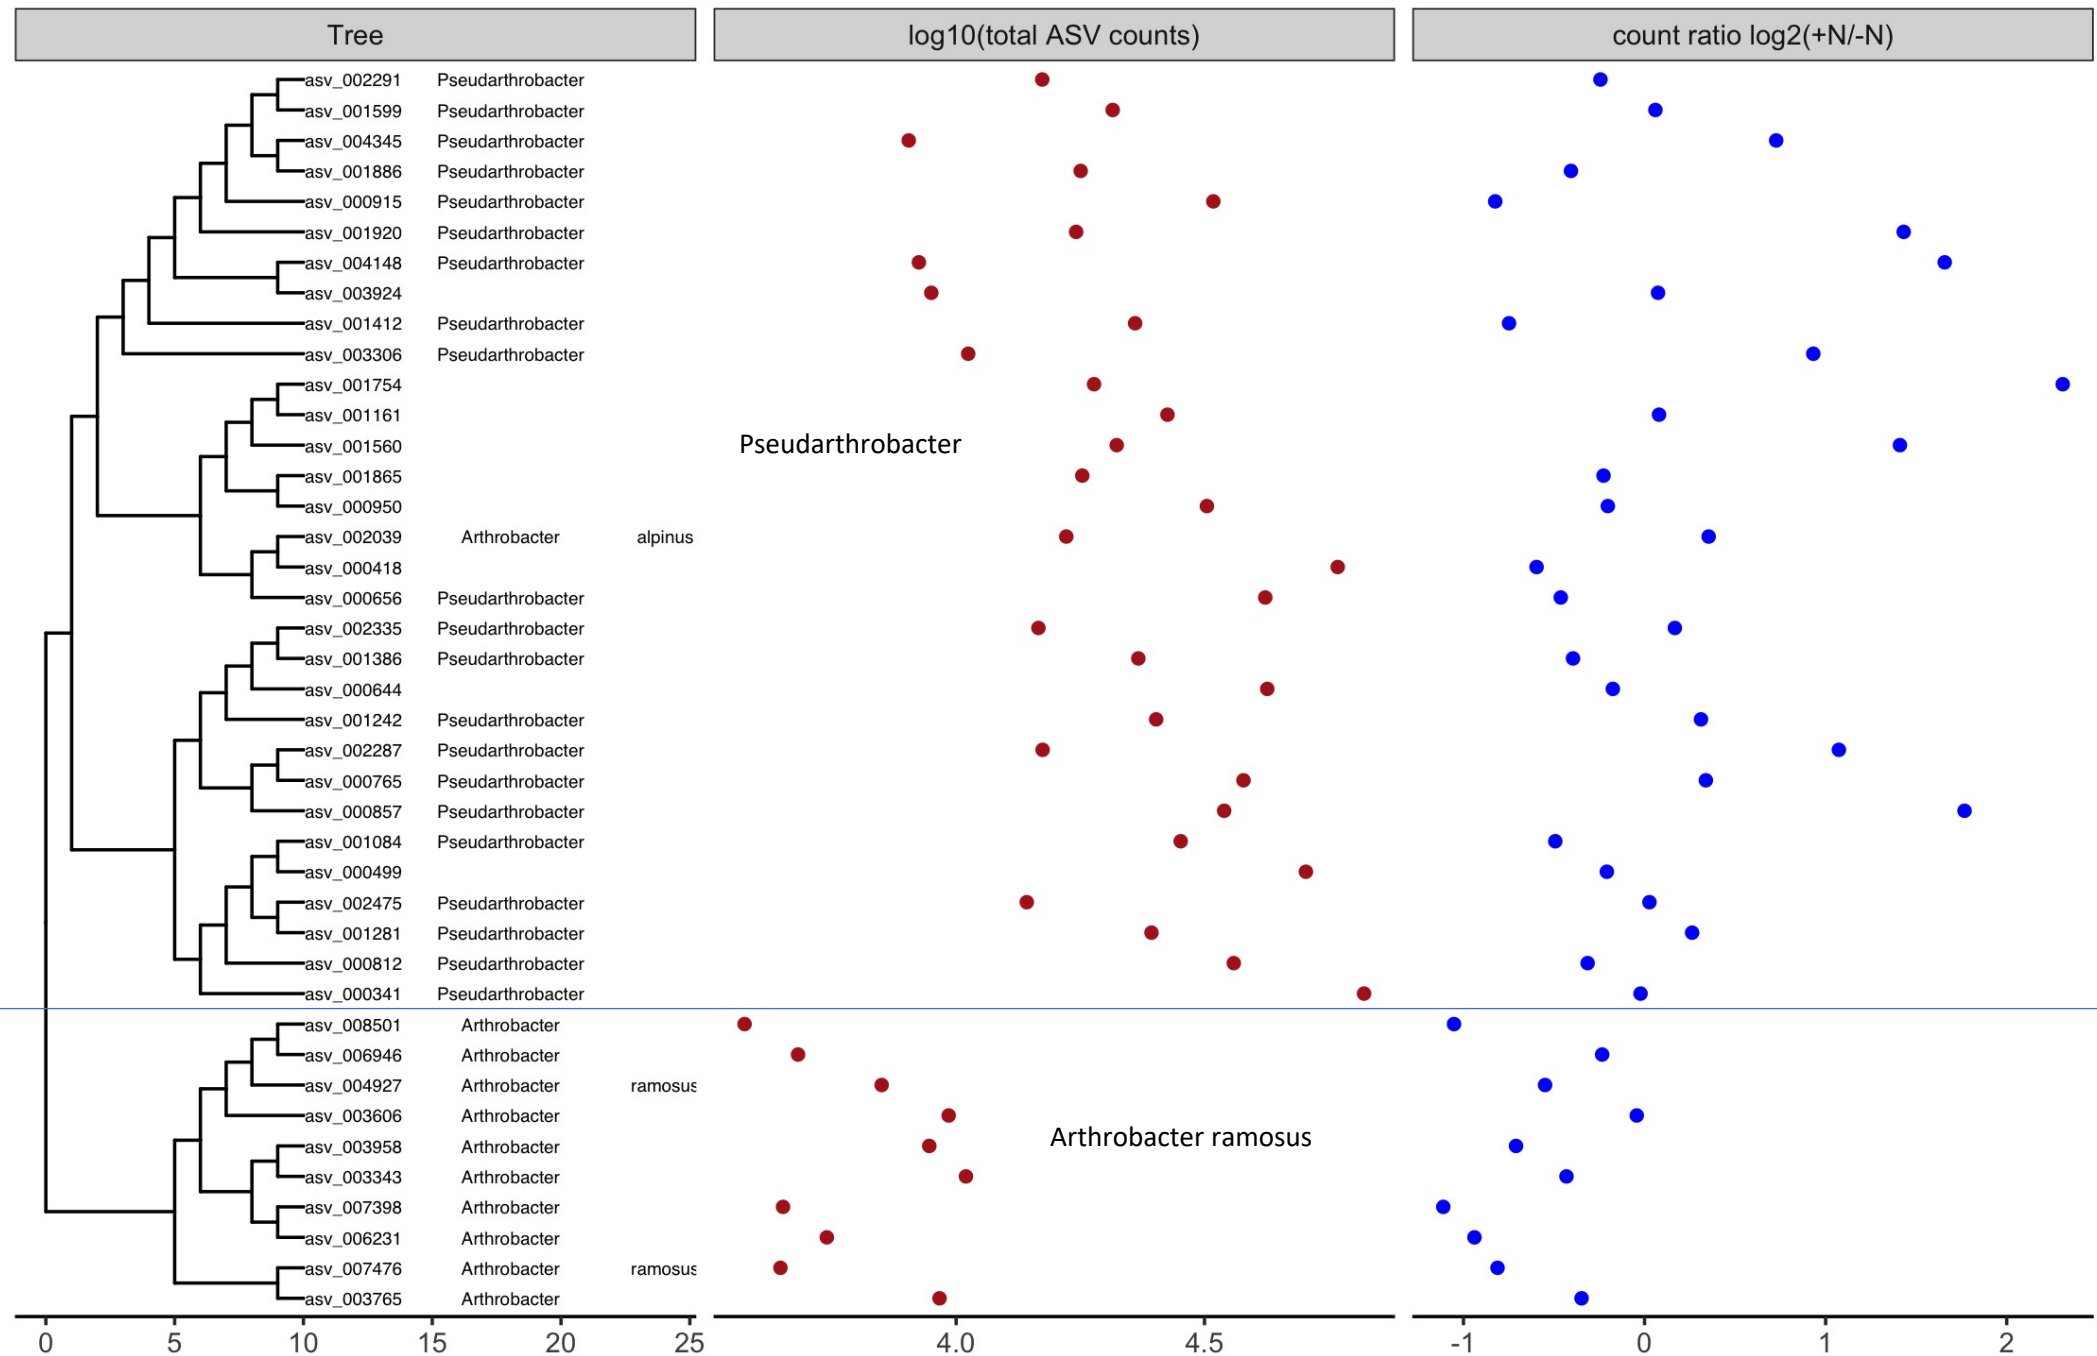

# Vicinamibacteraceae

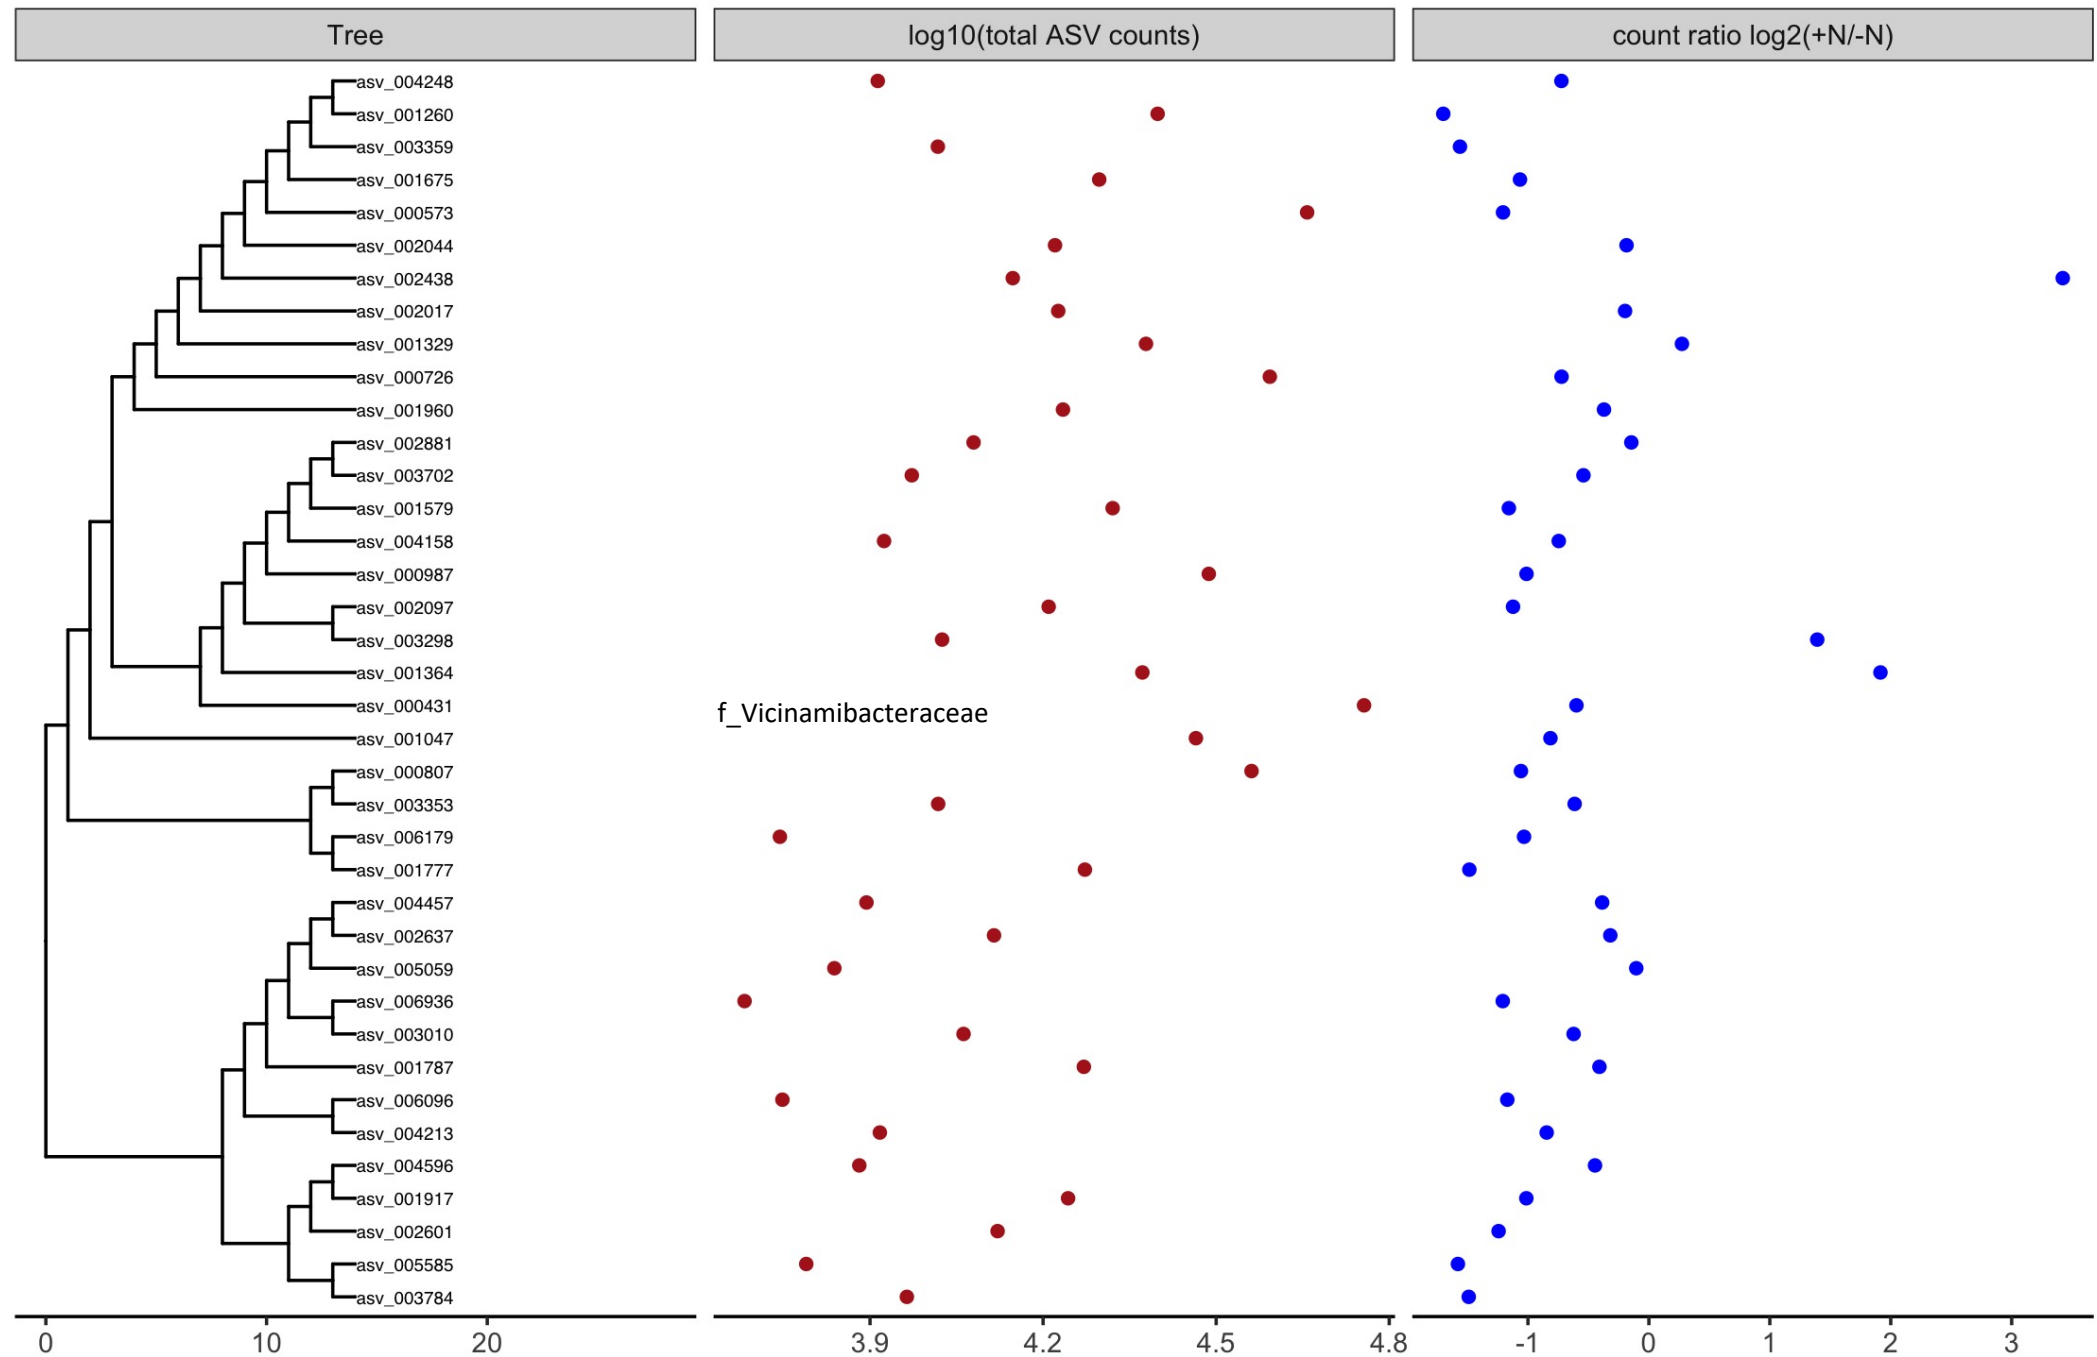

Caulobacteraceae

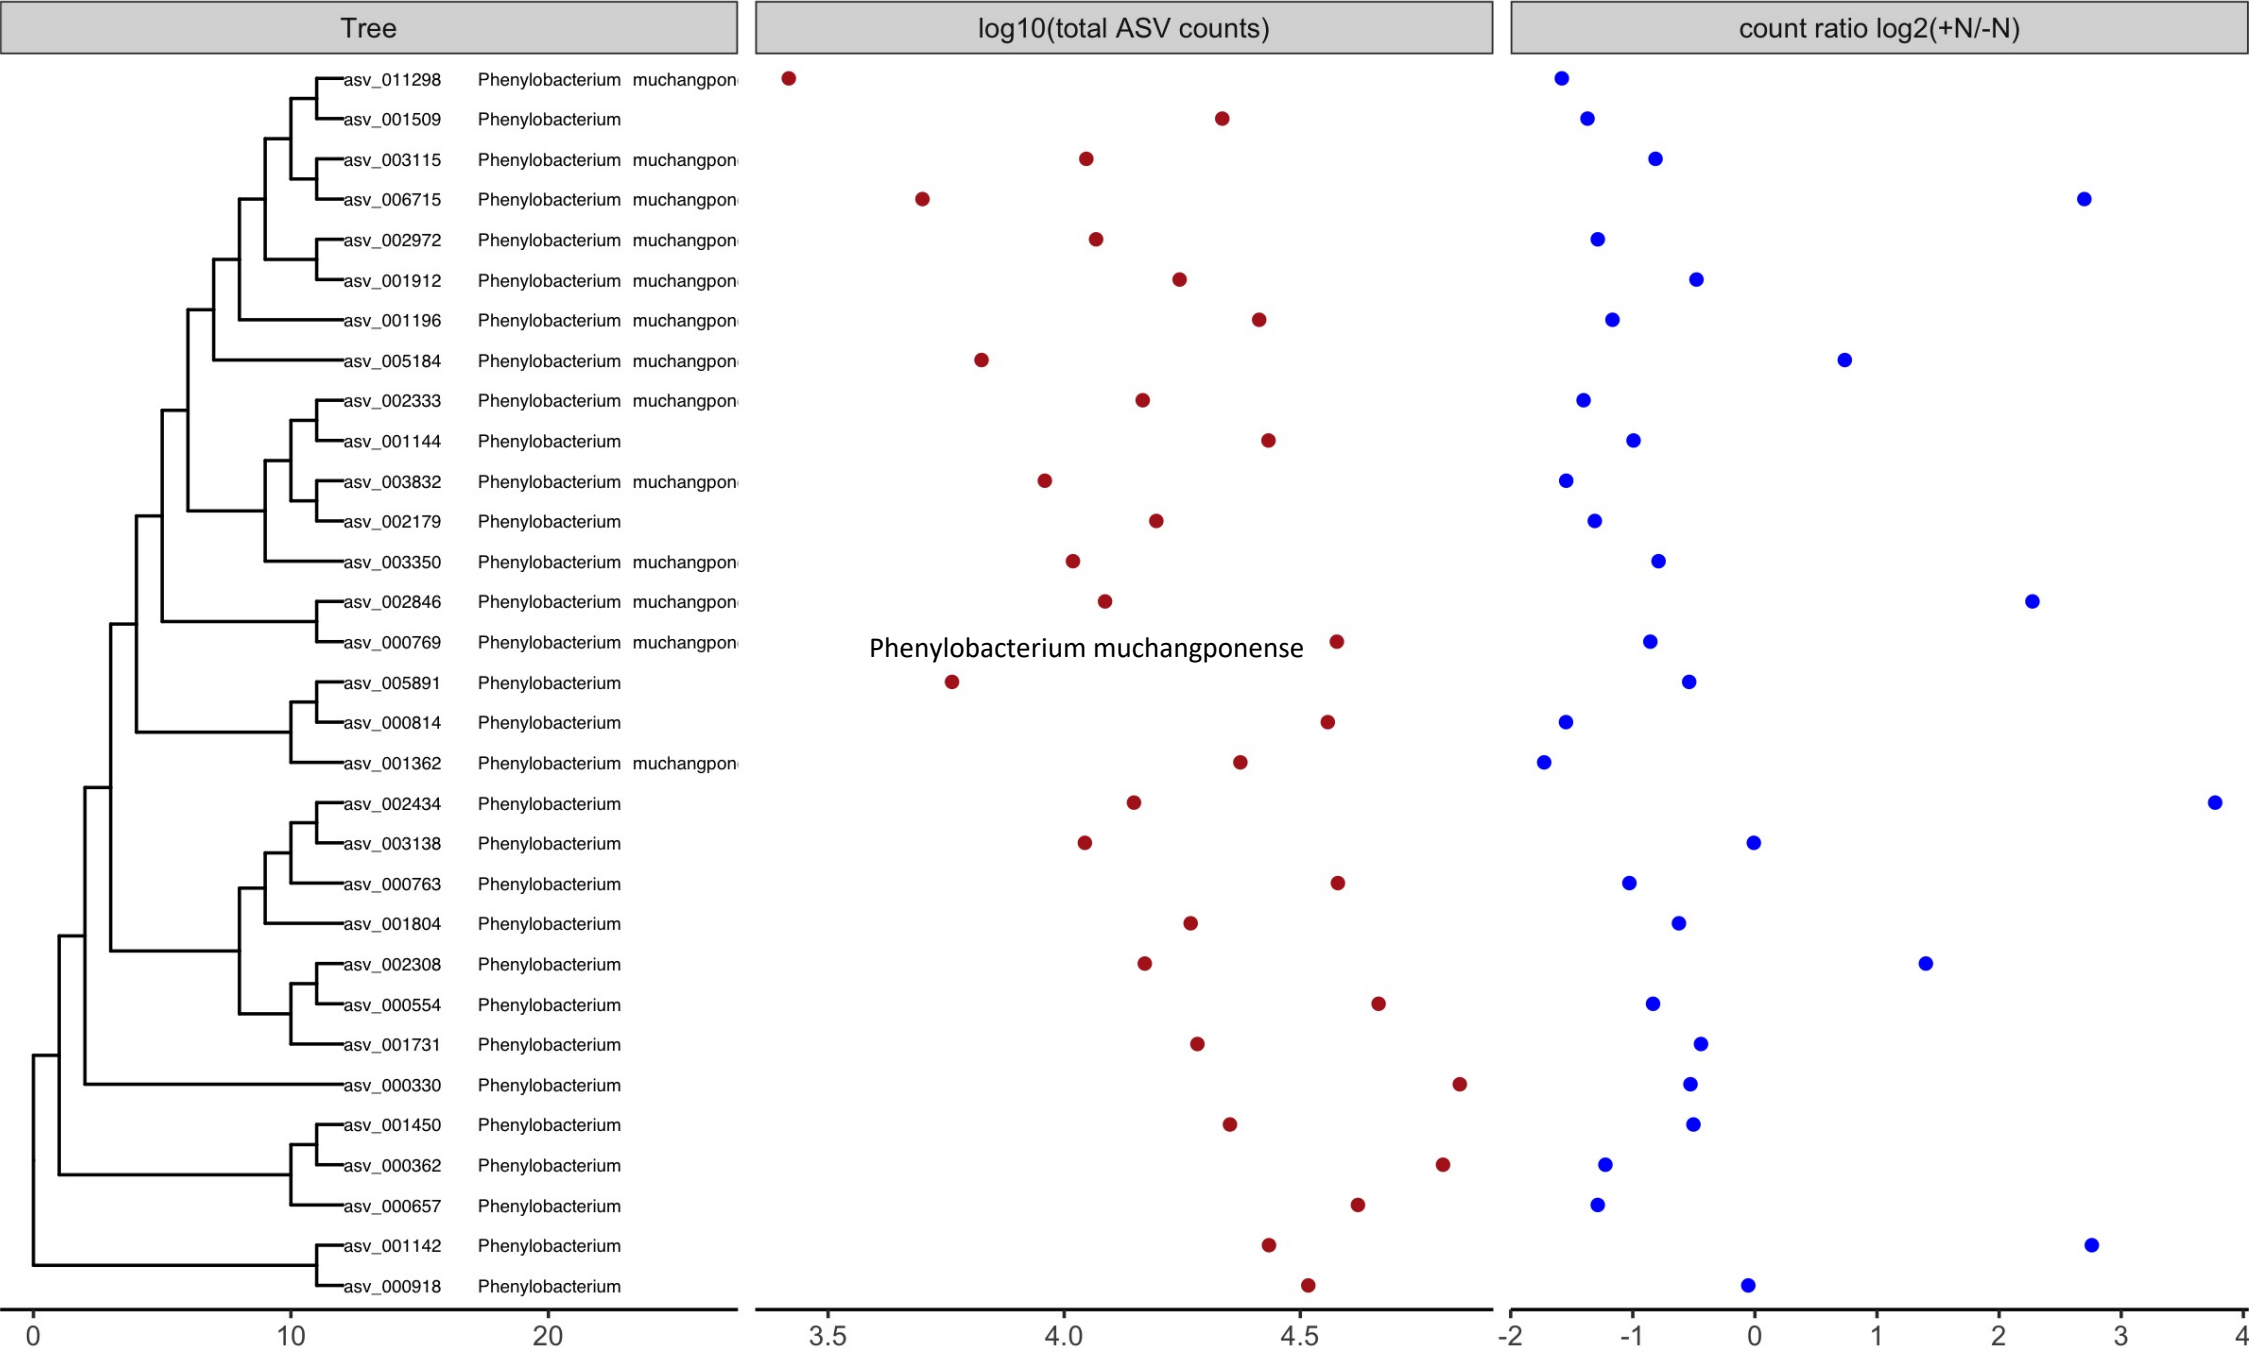



Labraceae

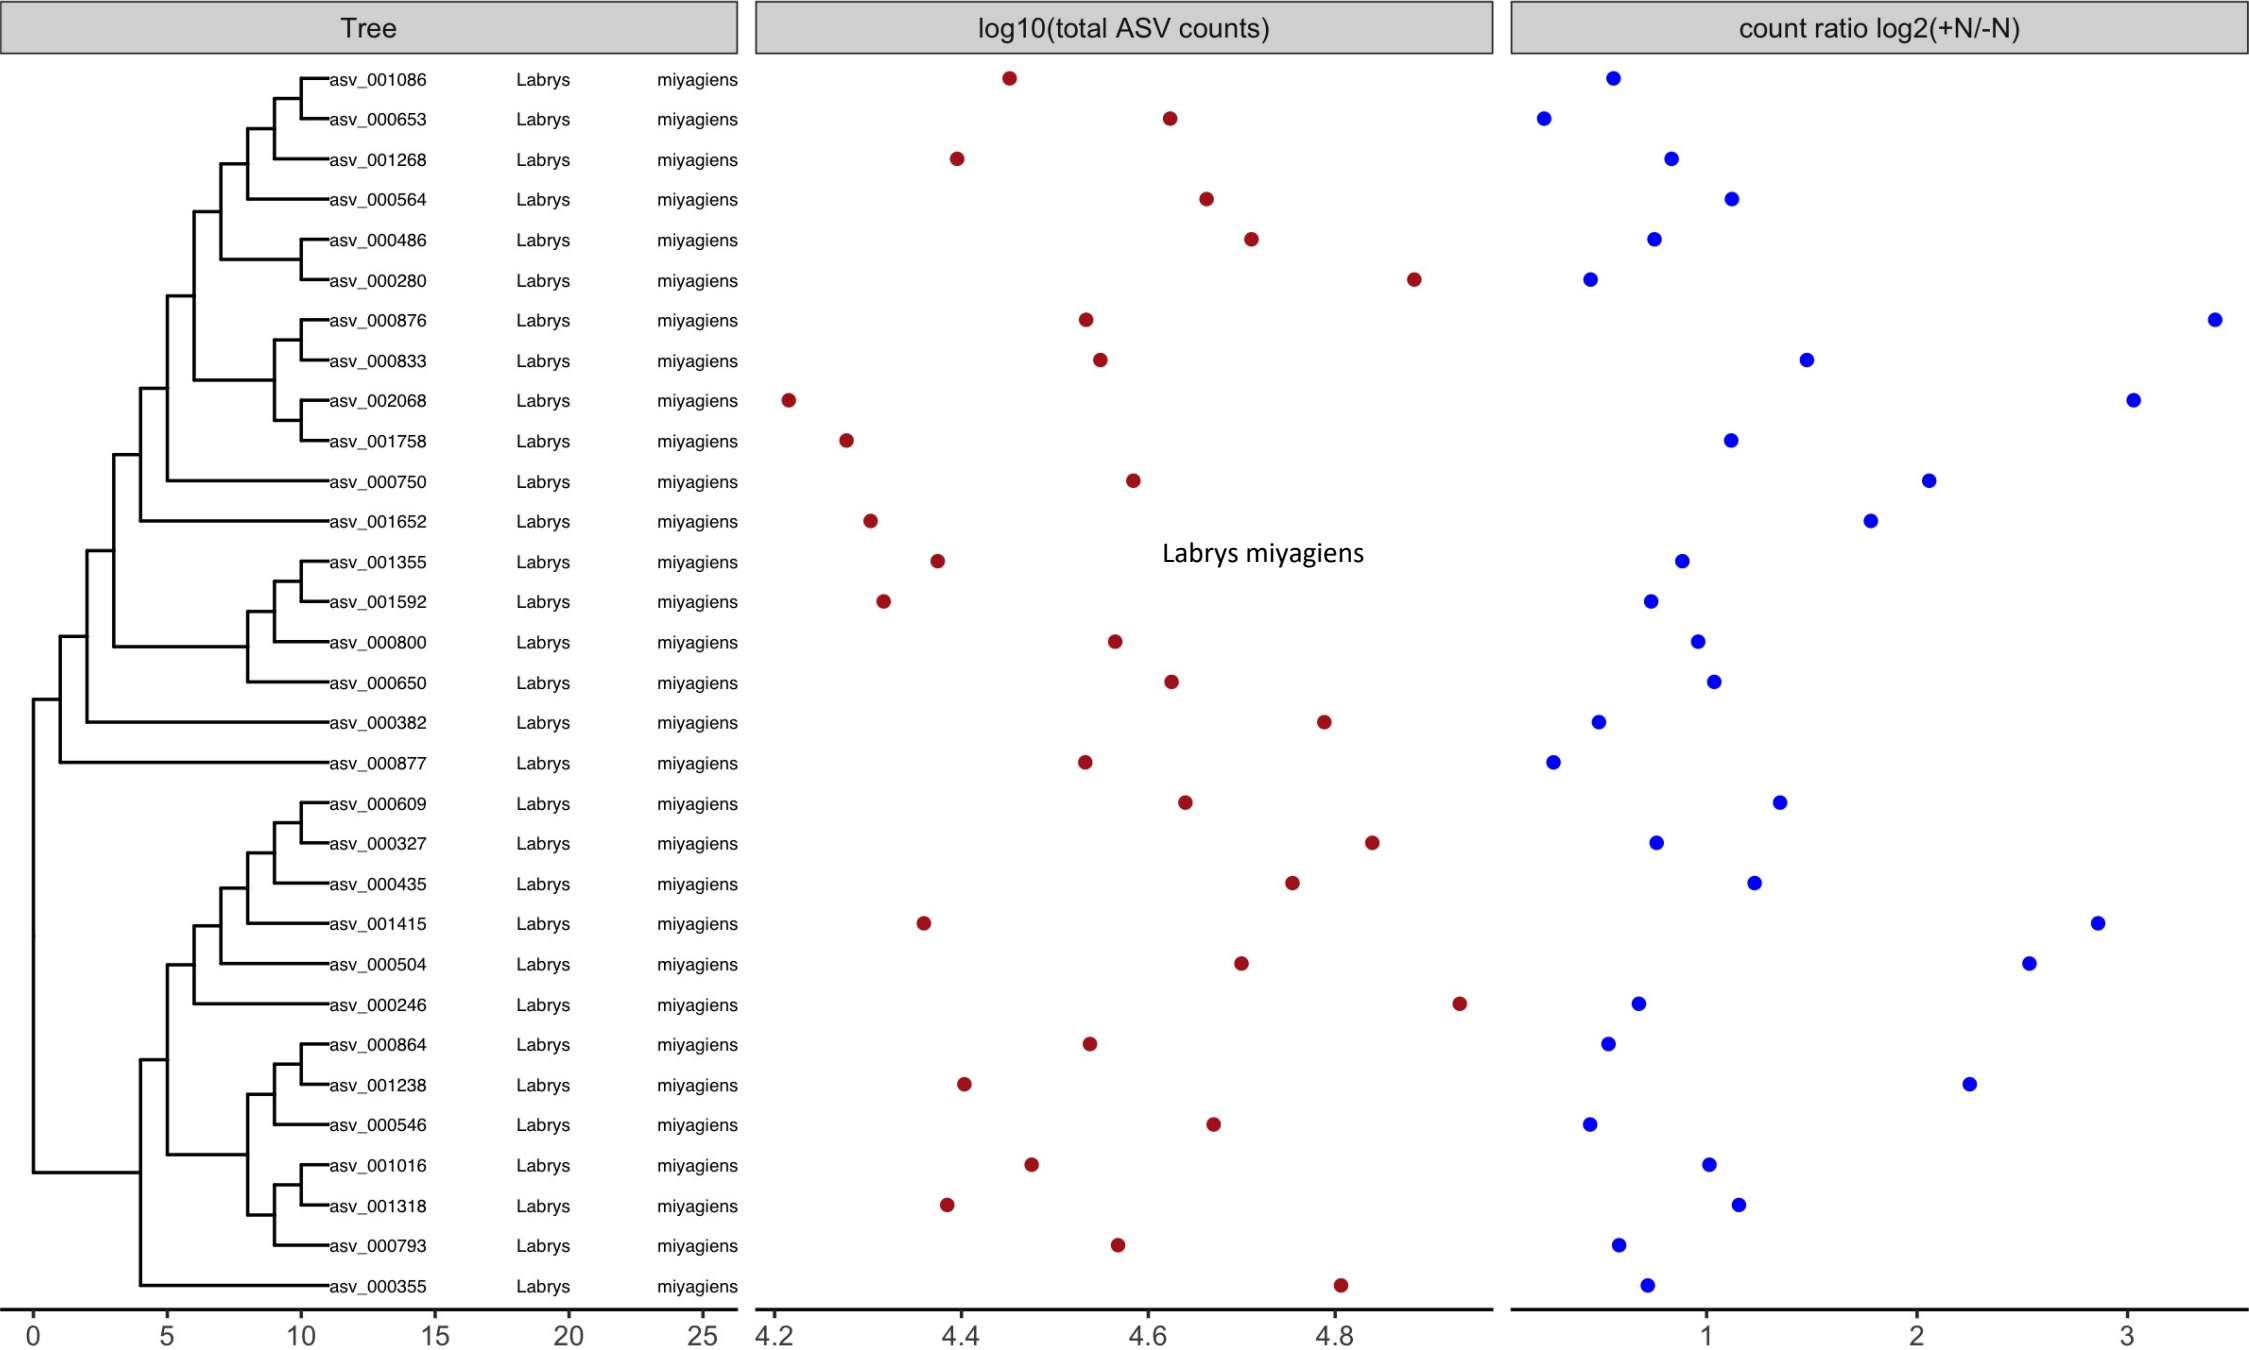

Alcaligenaceae

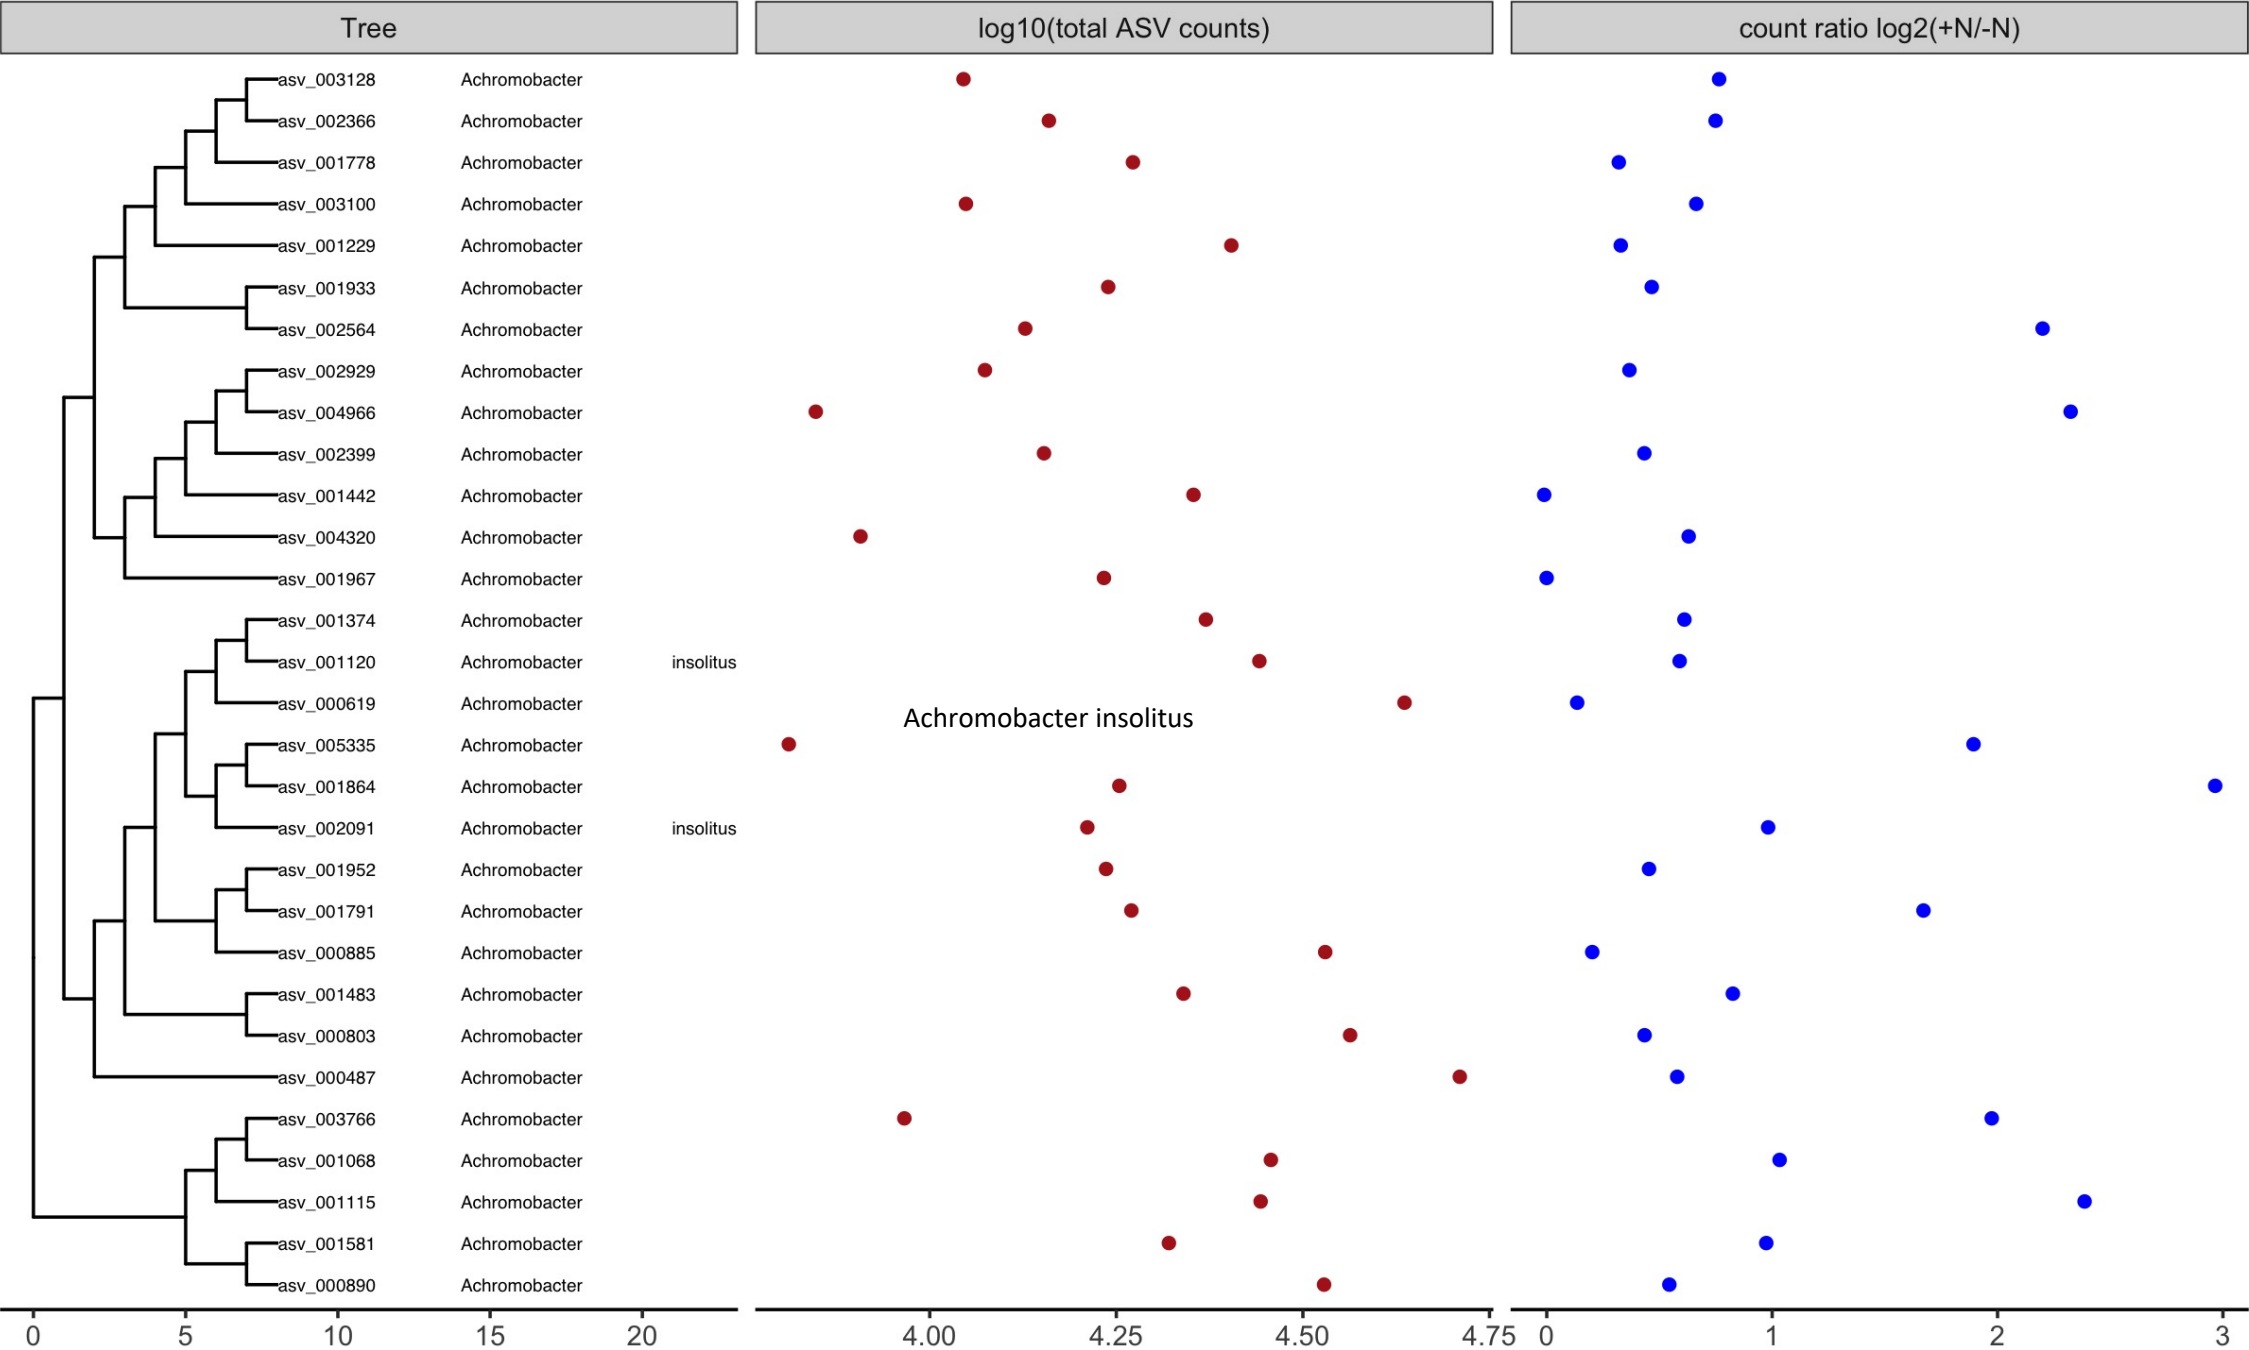

Intrasporangiaceae

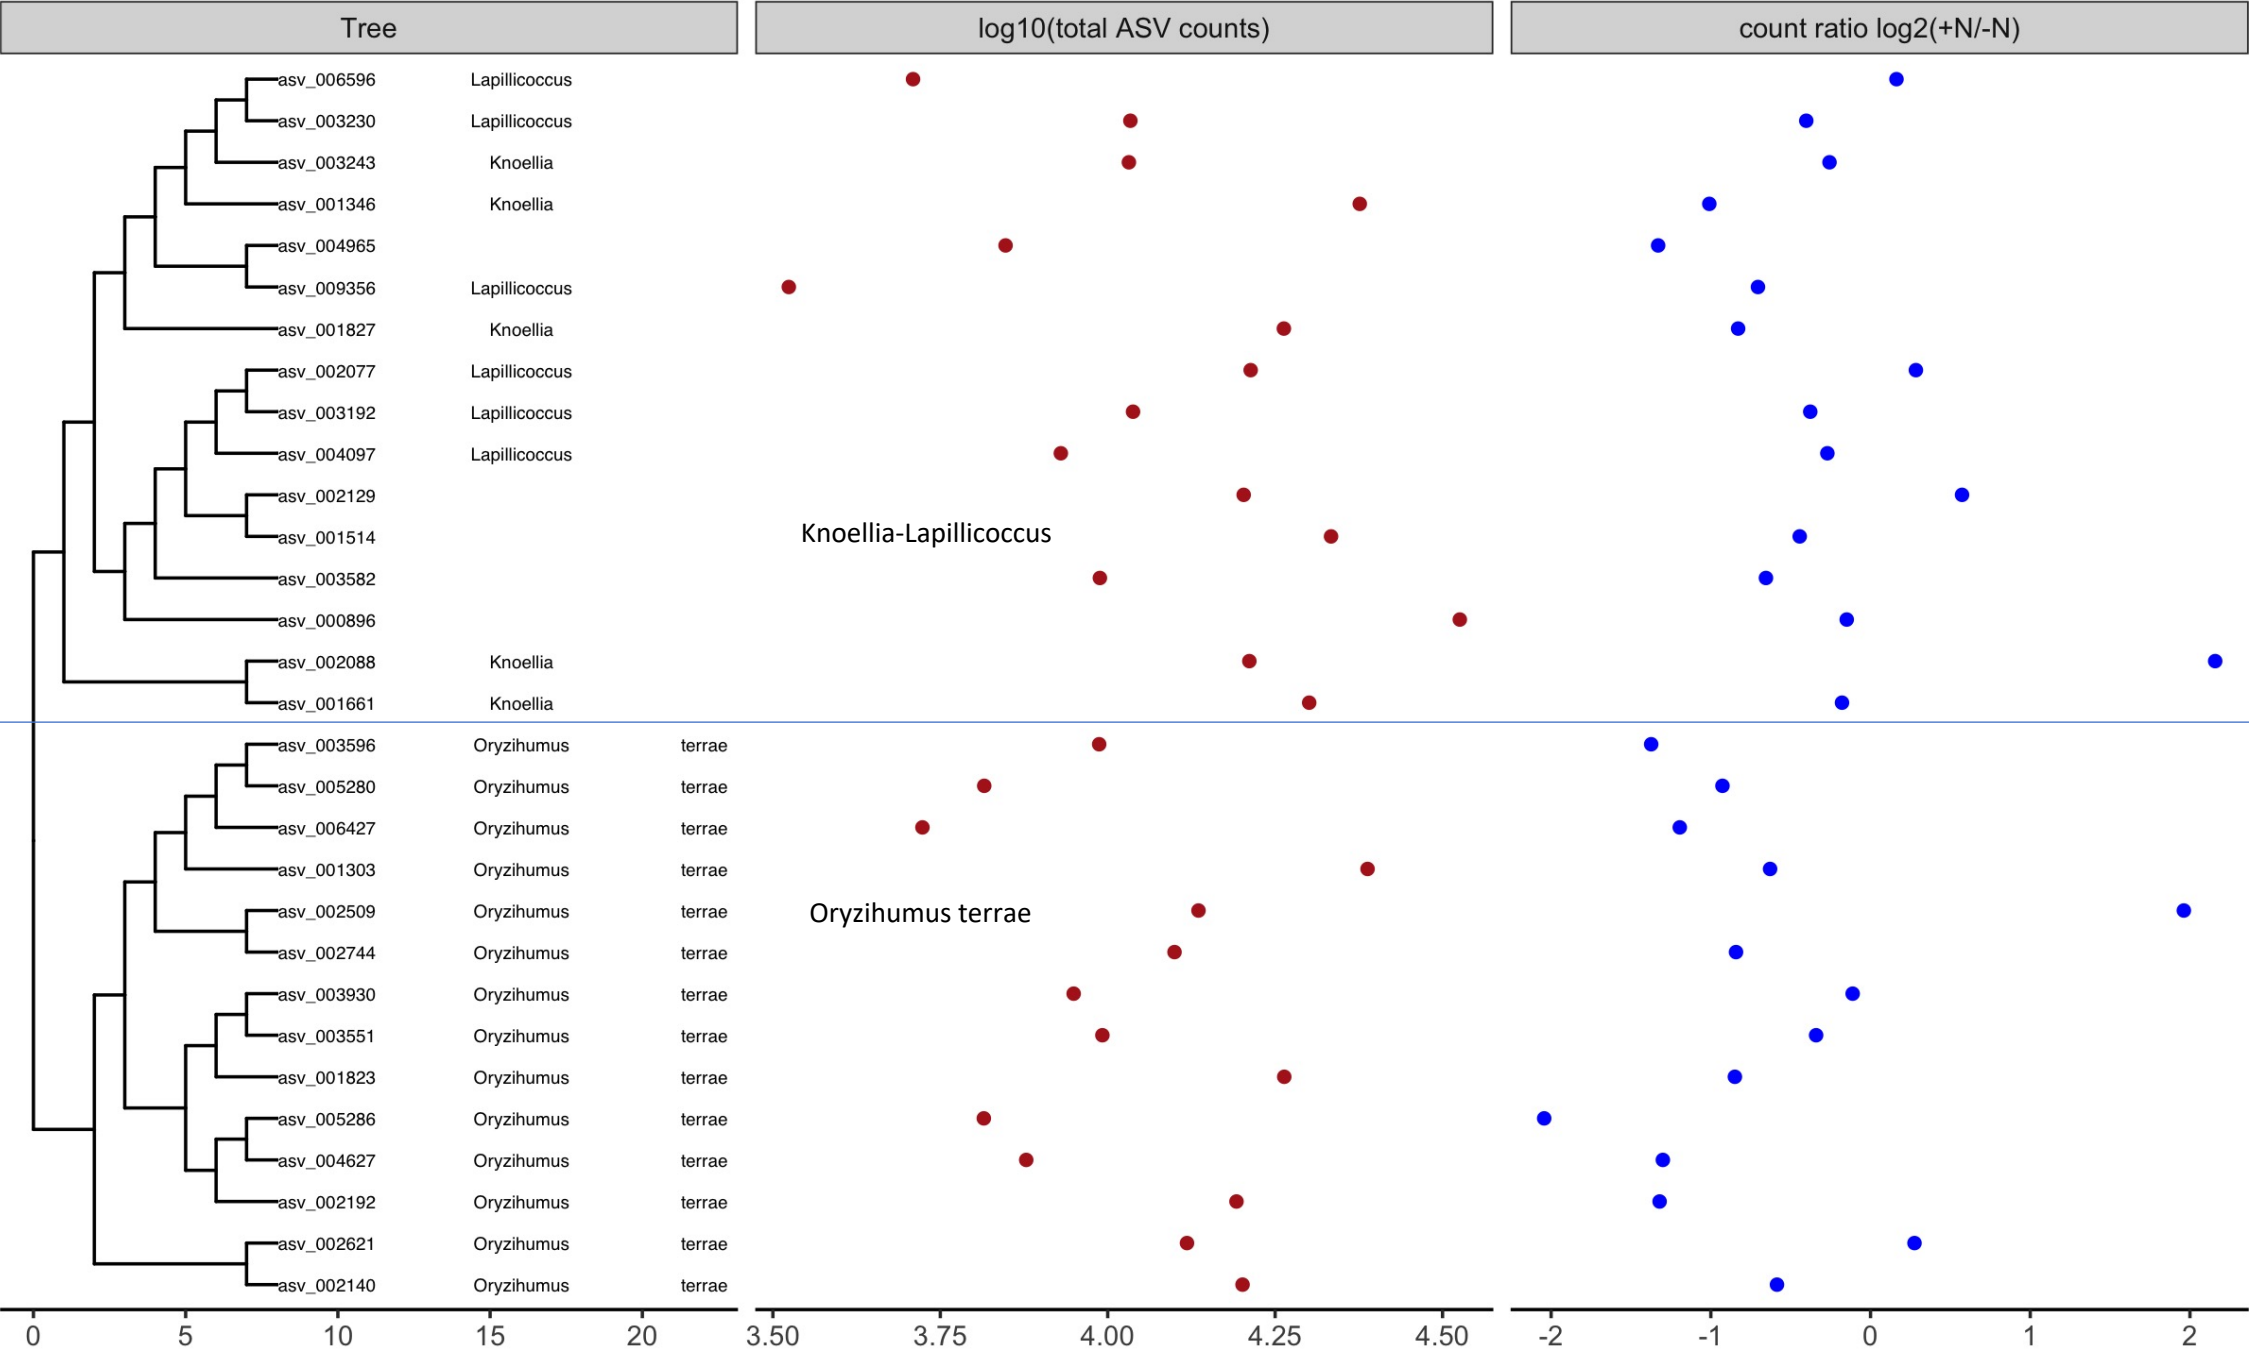

Acidobacteriaceae (Subgroup 1)

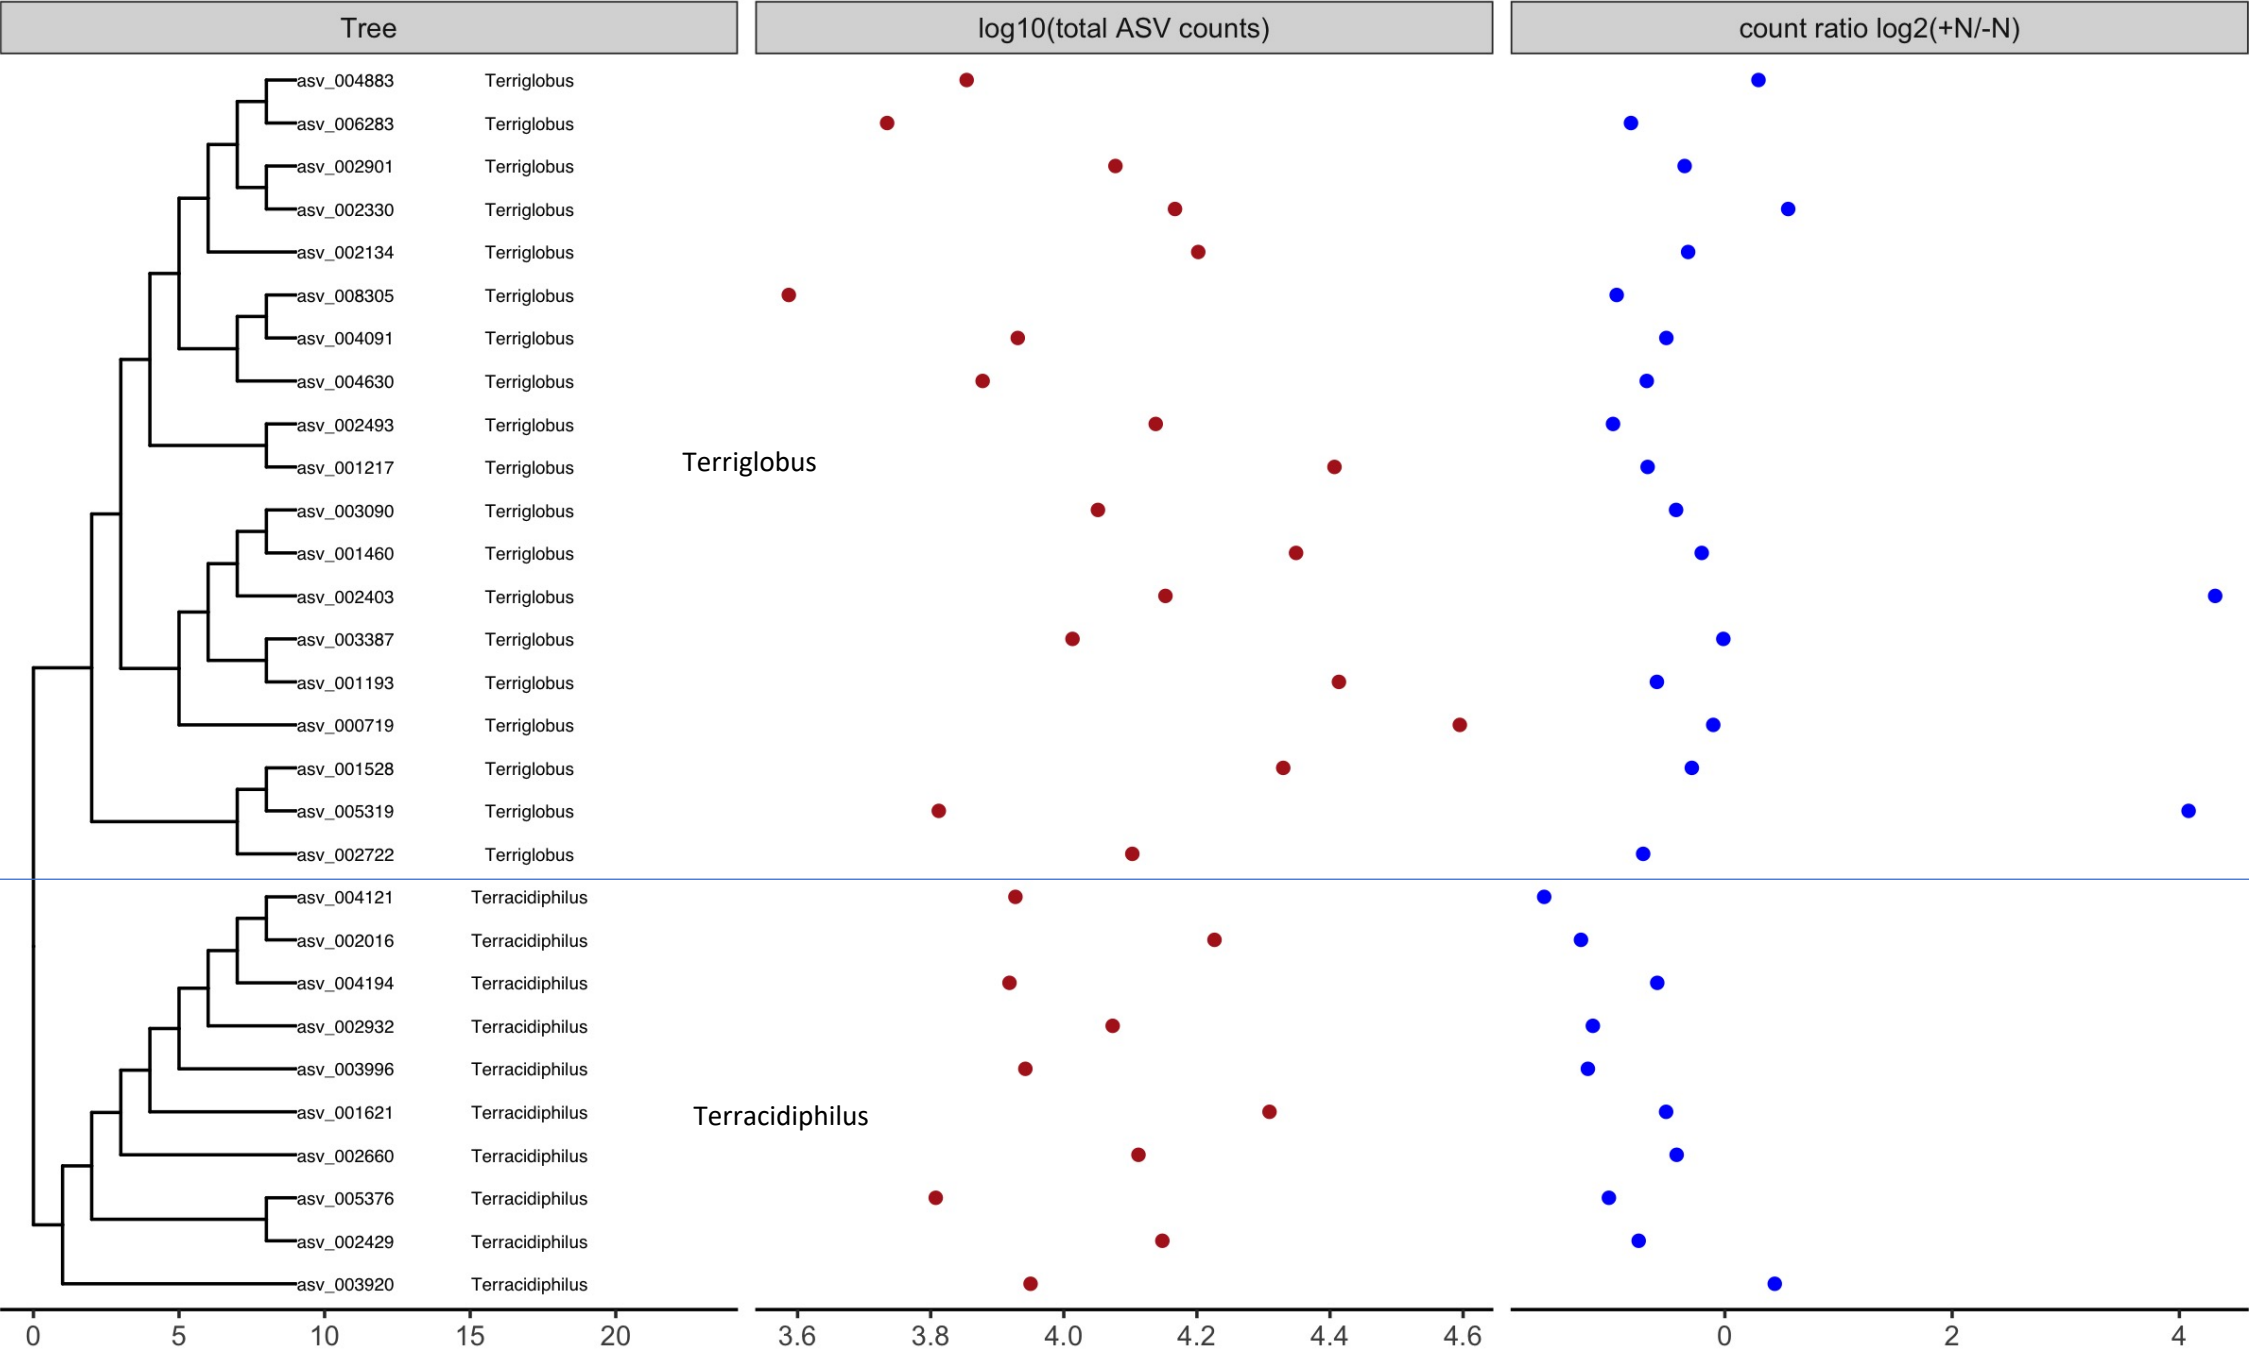

Rubritaleaceae

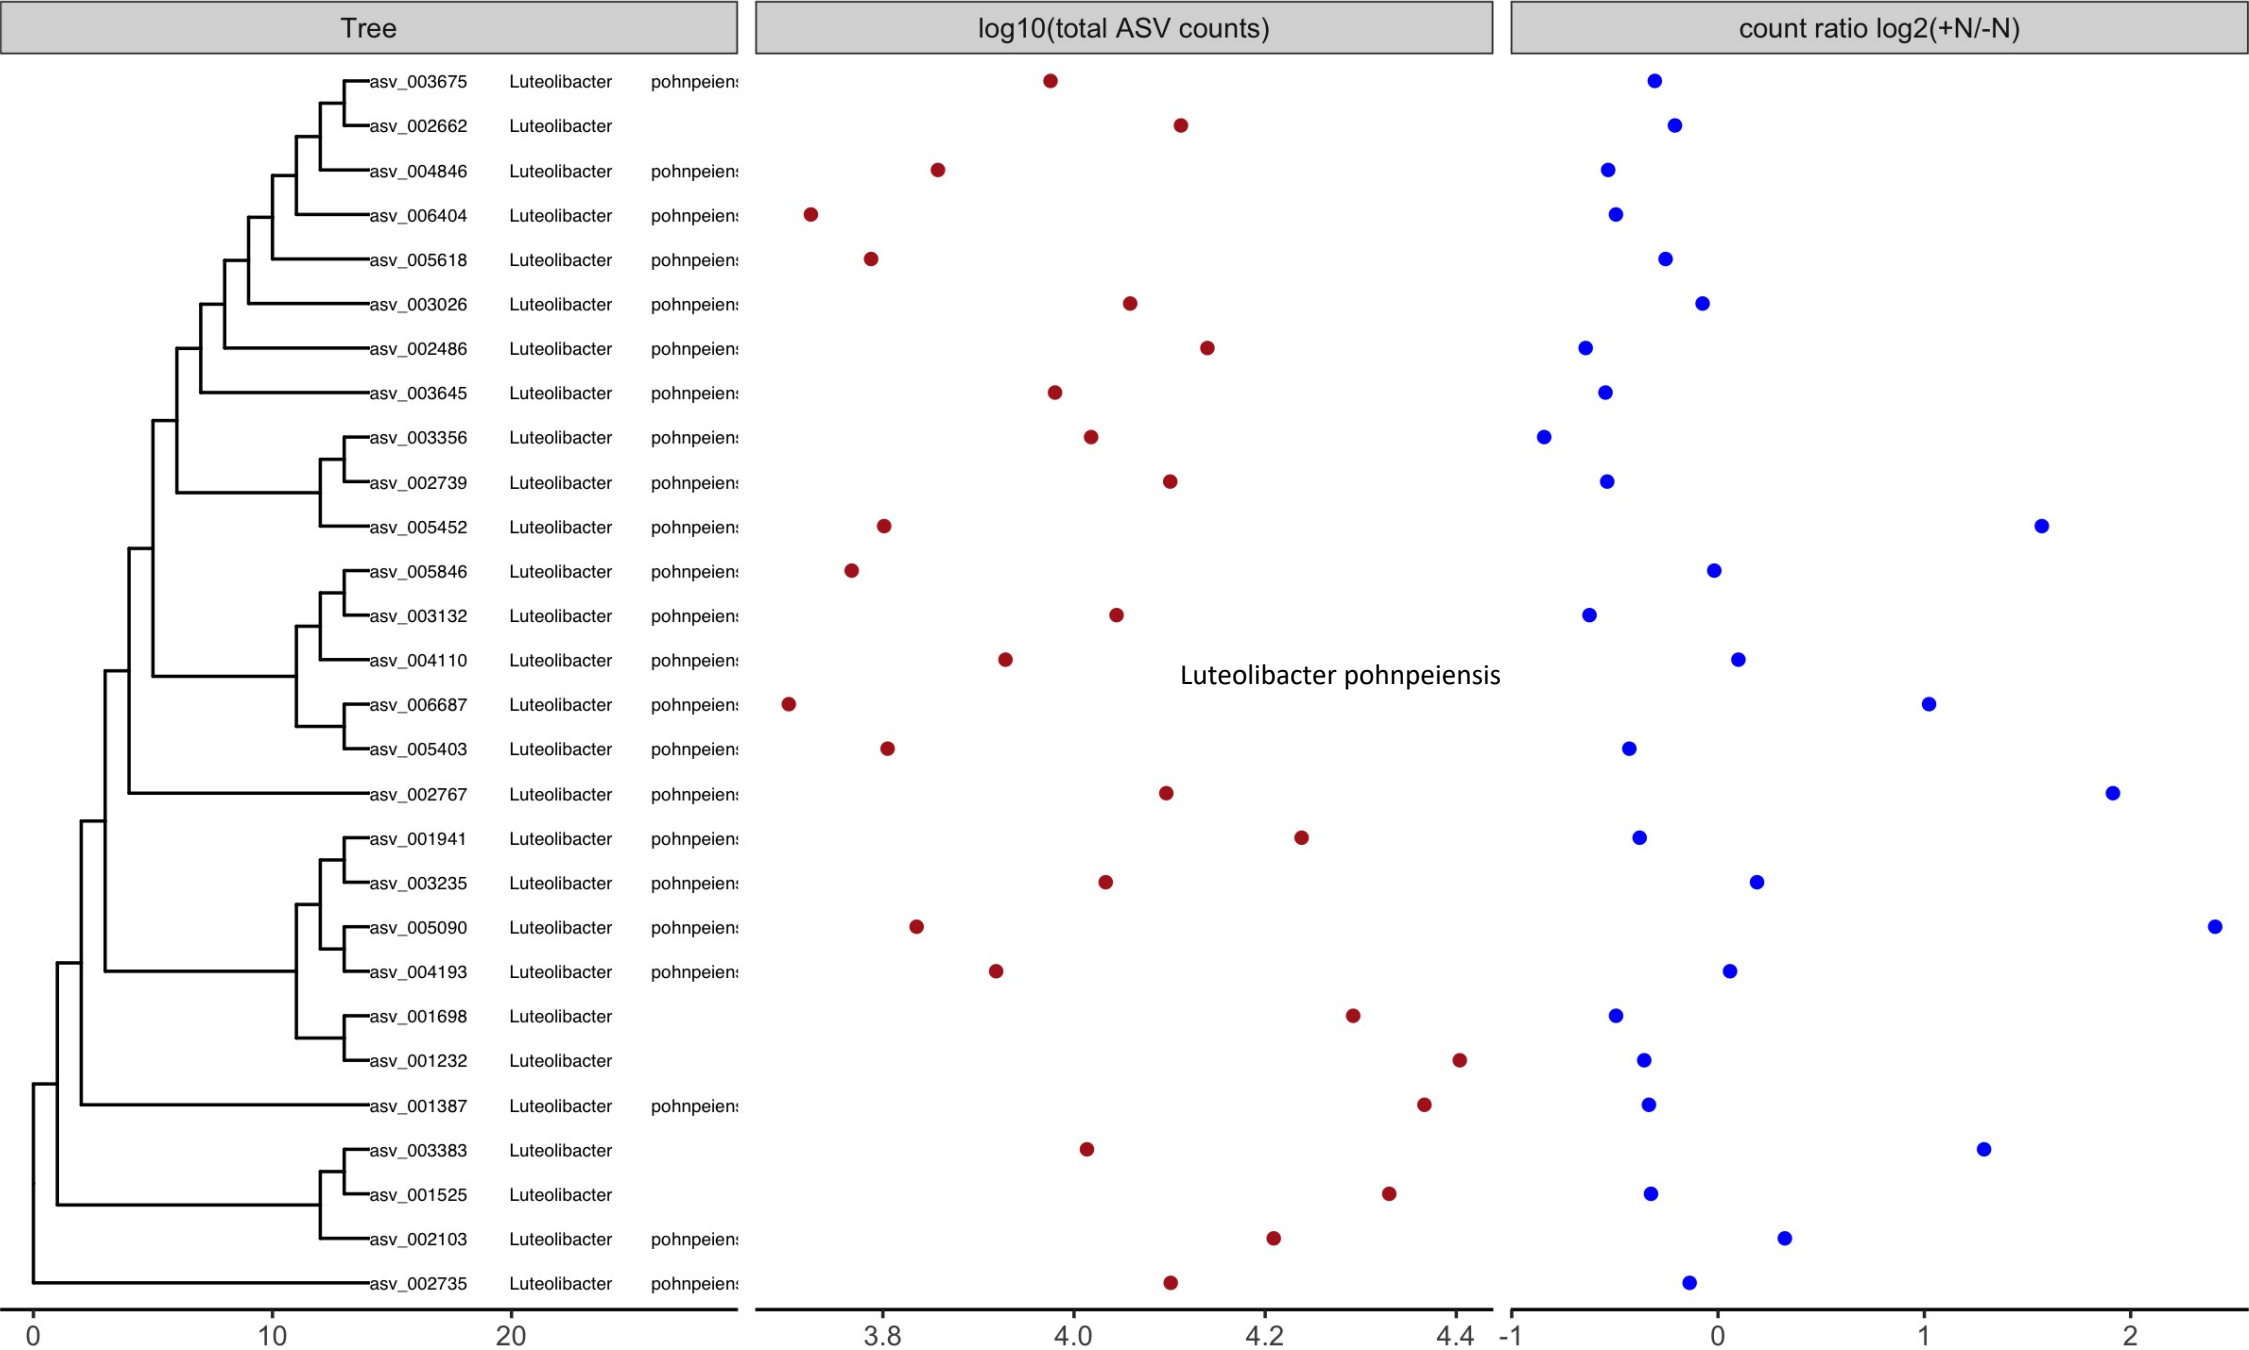



Mycobacteriaceae

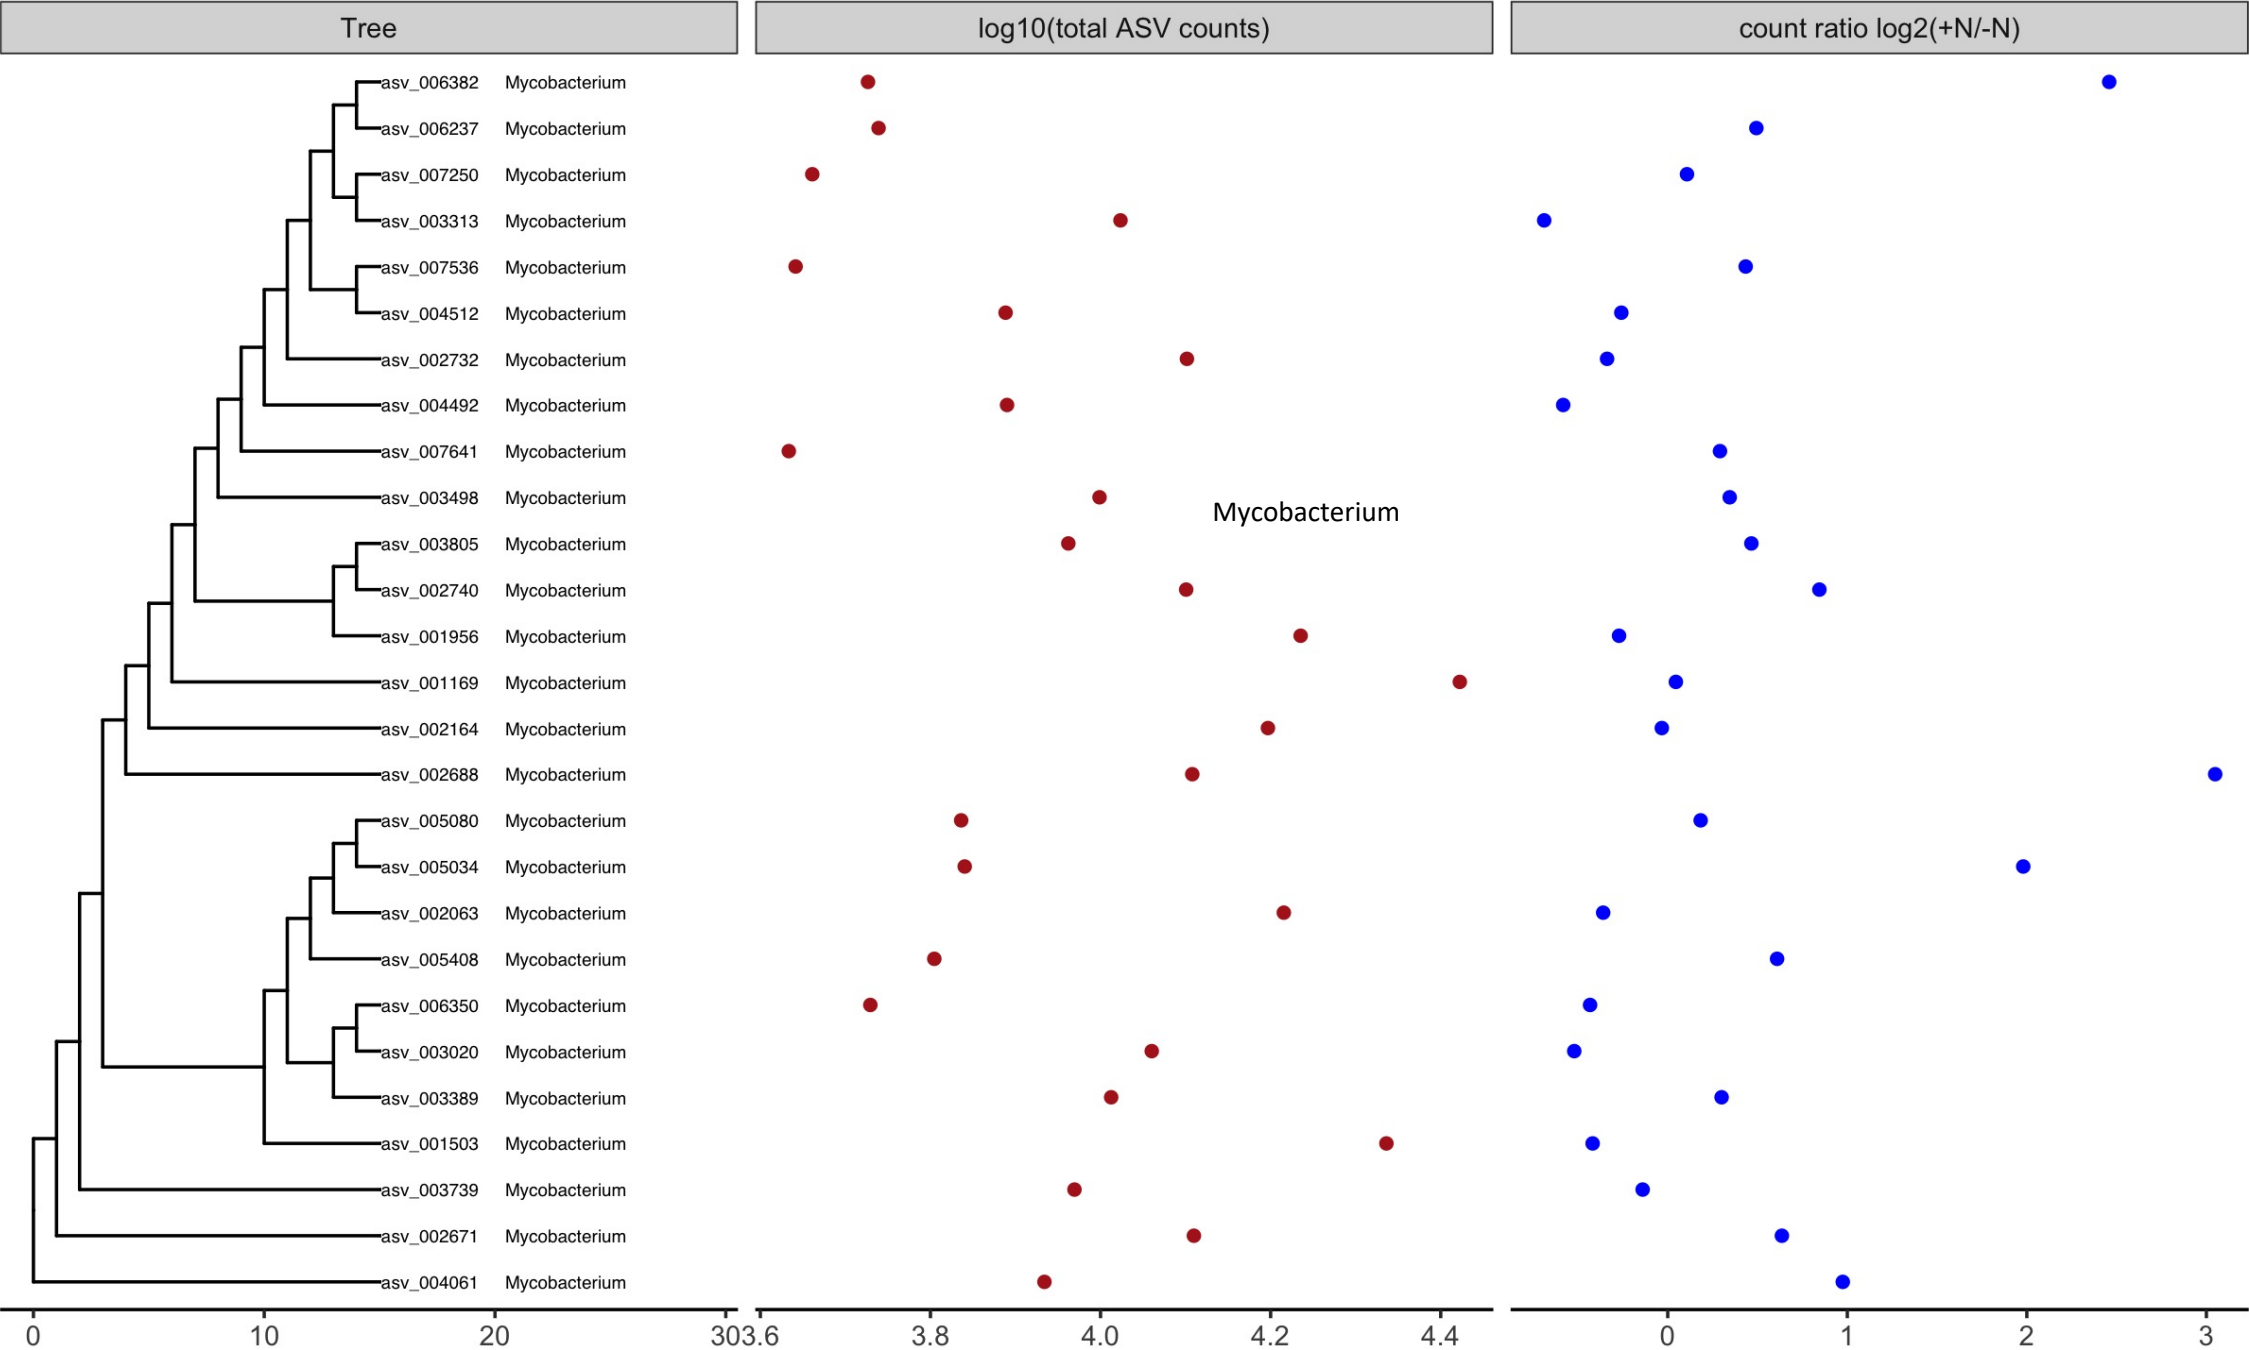

LWQ8

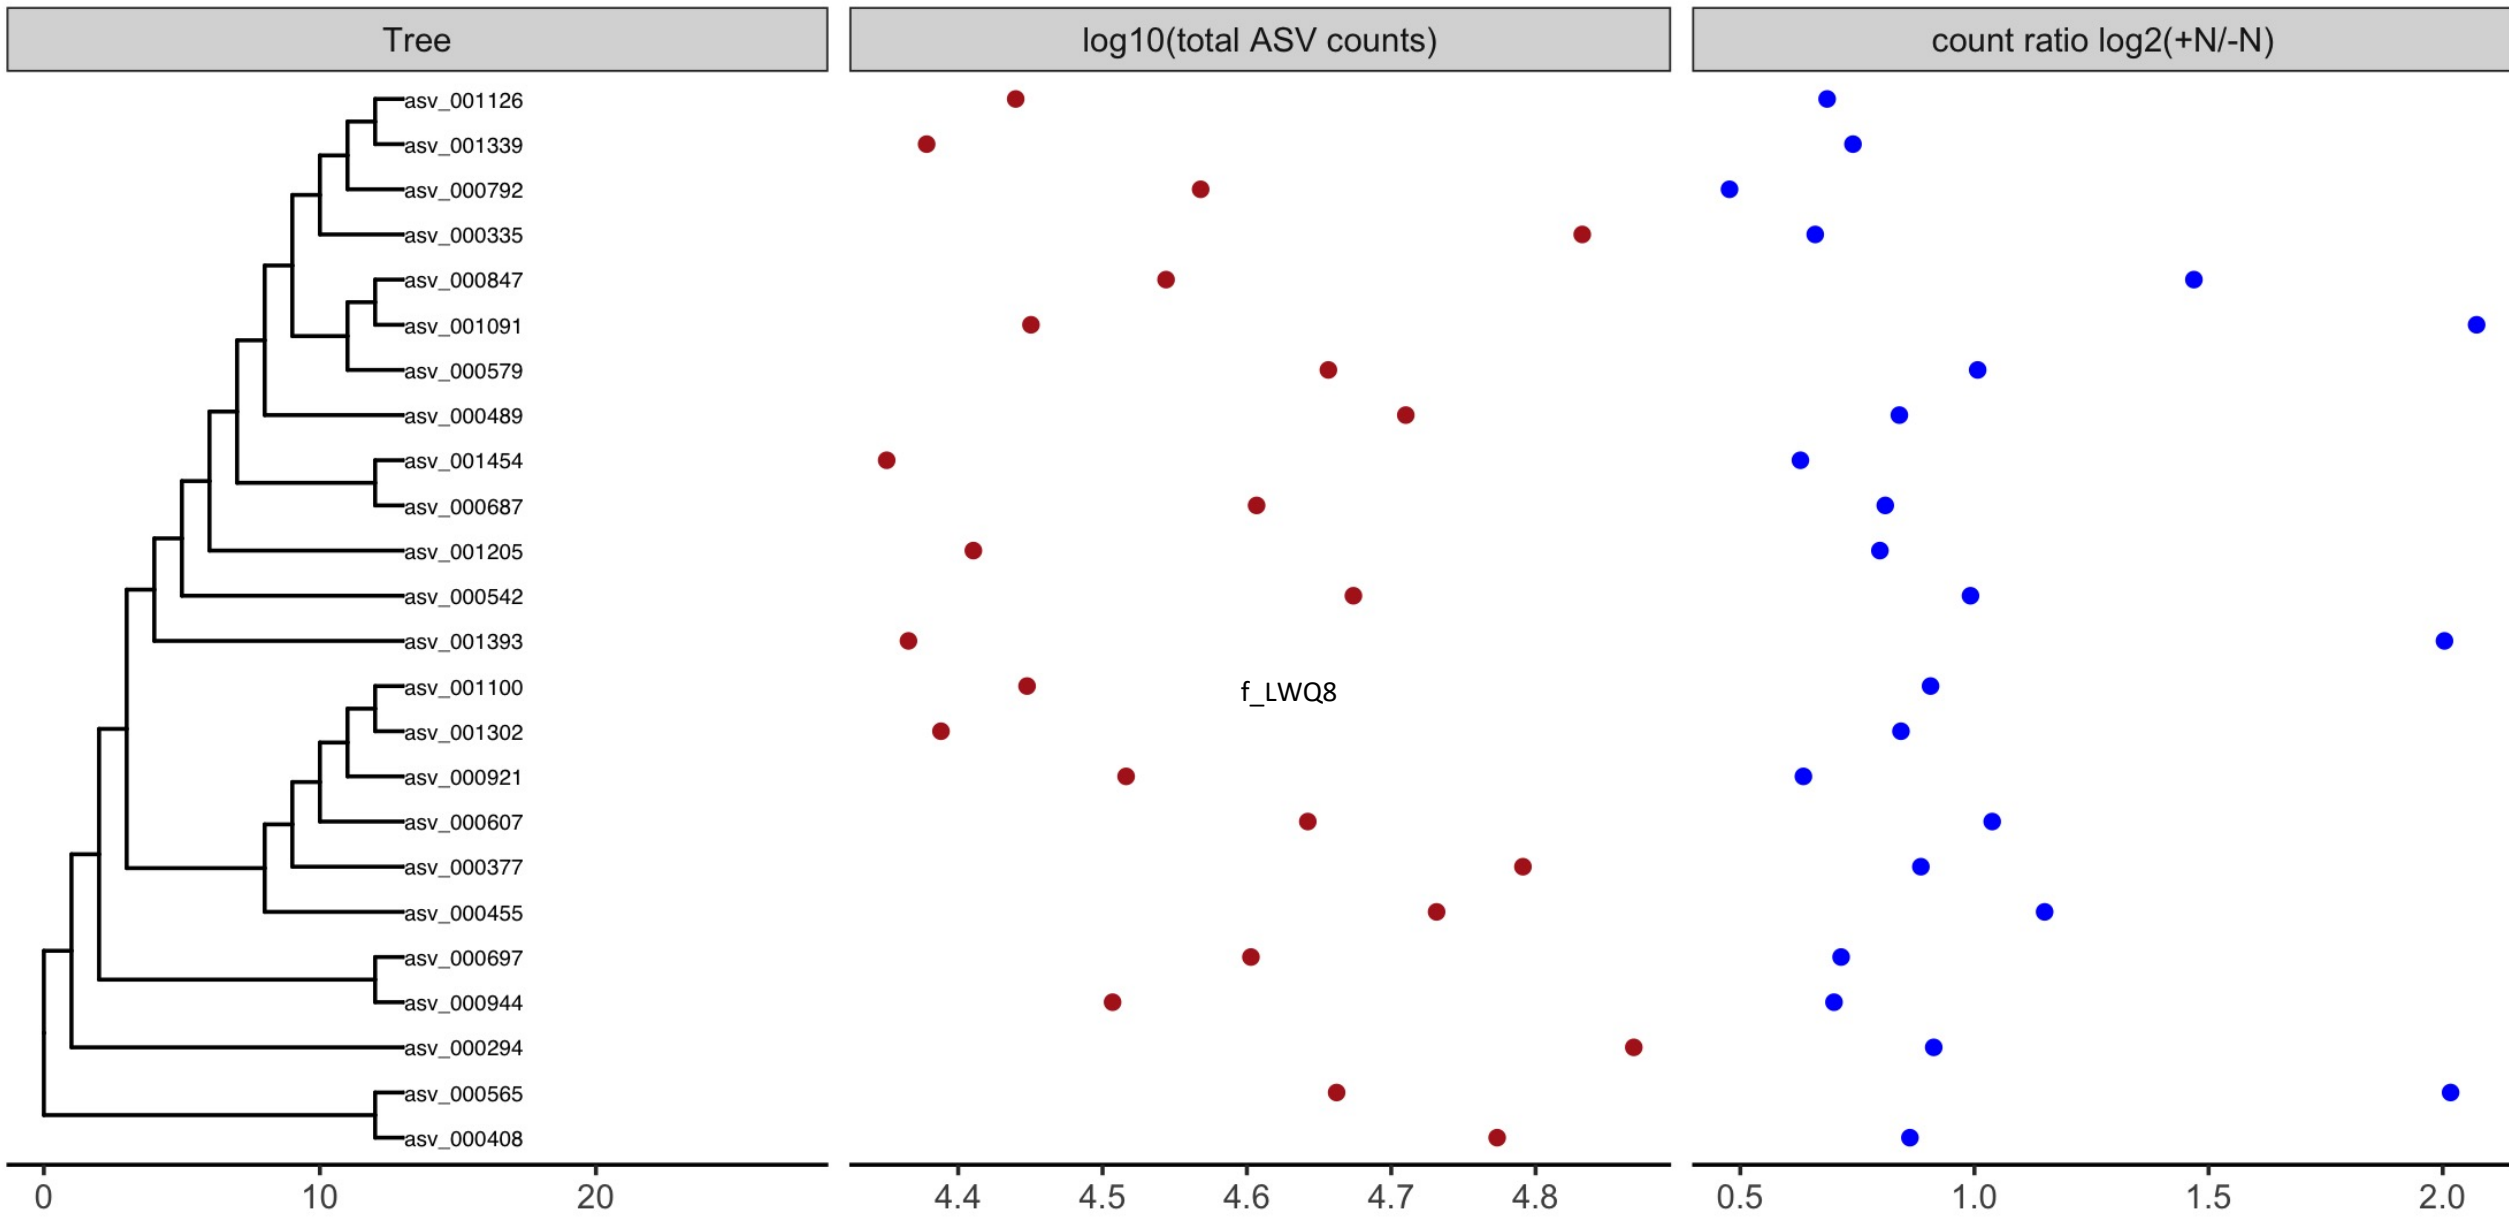

# Pseudonocardiaceae

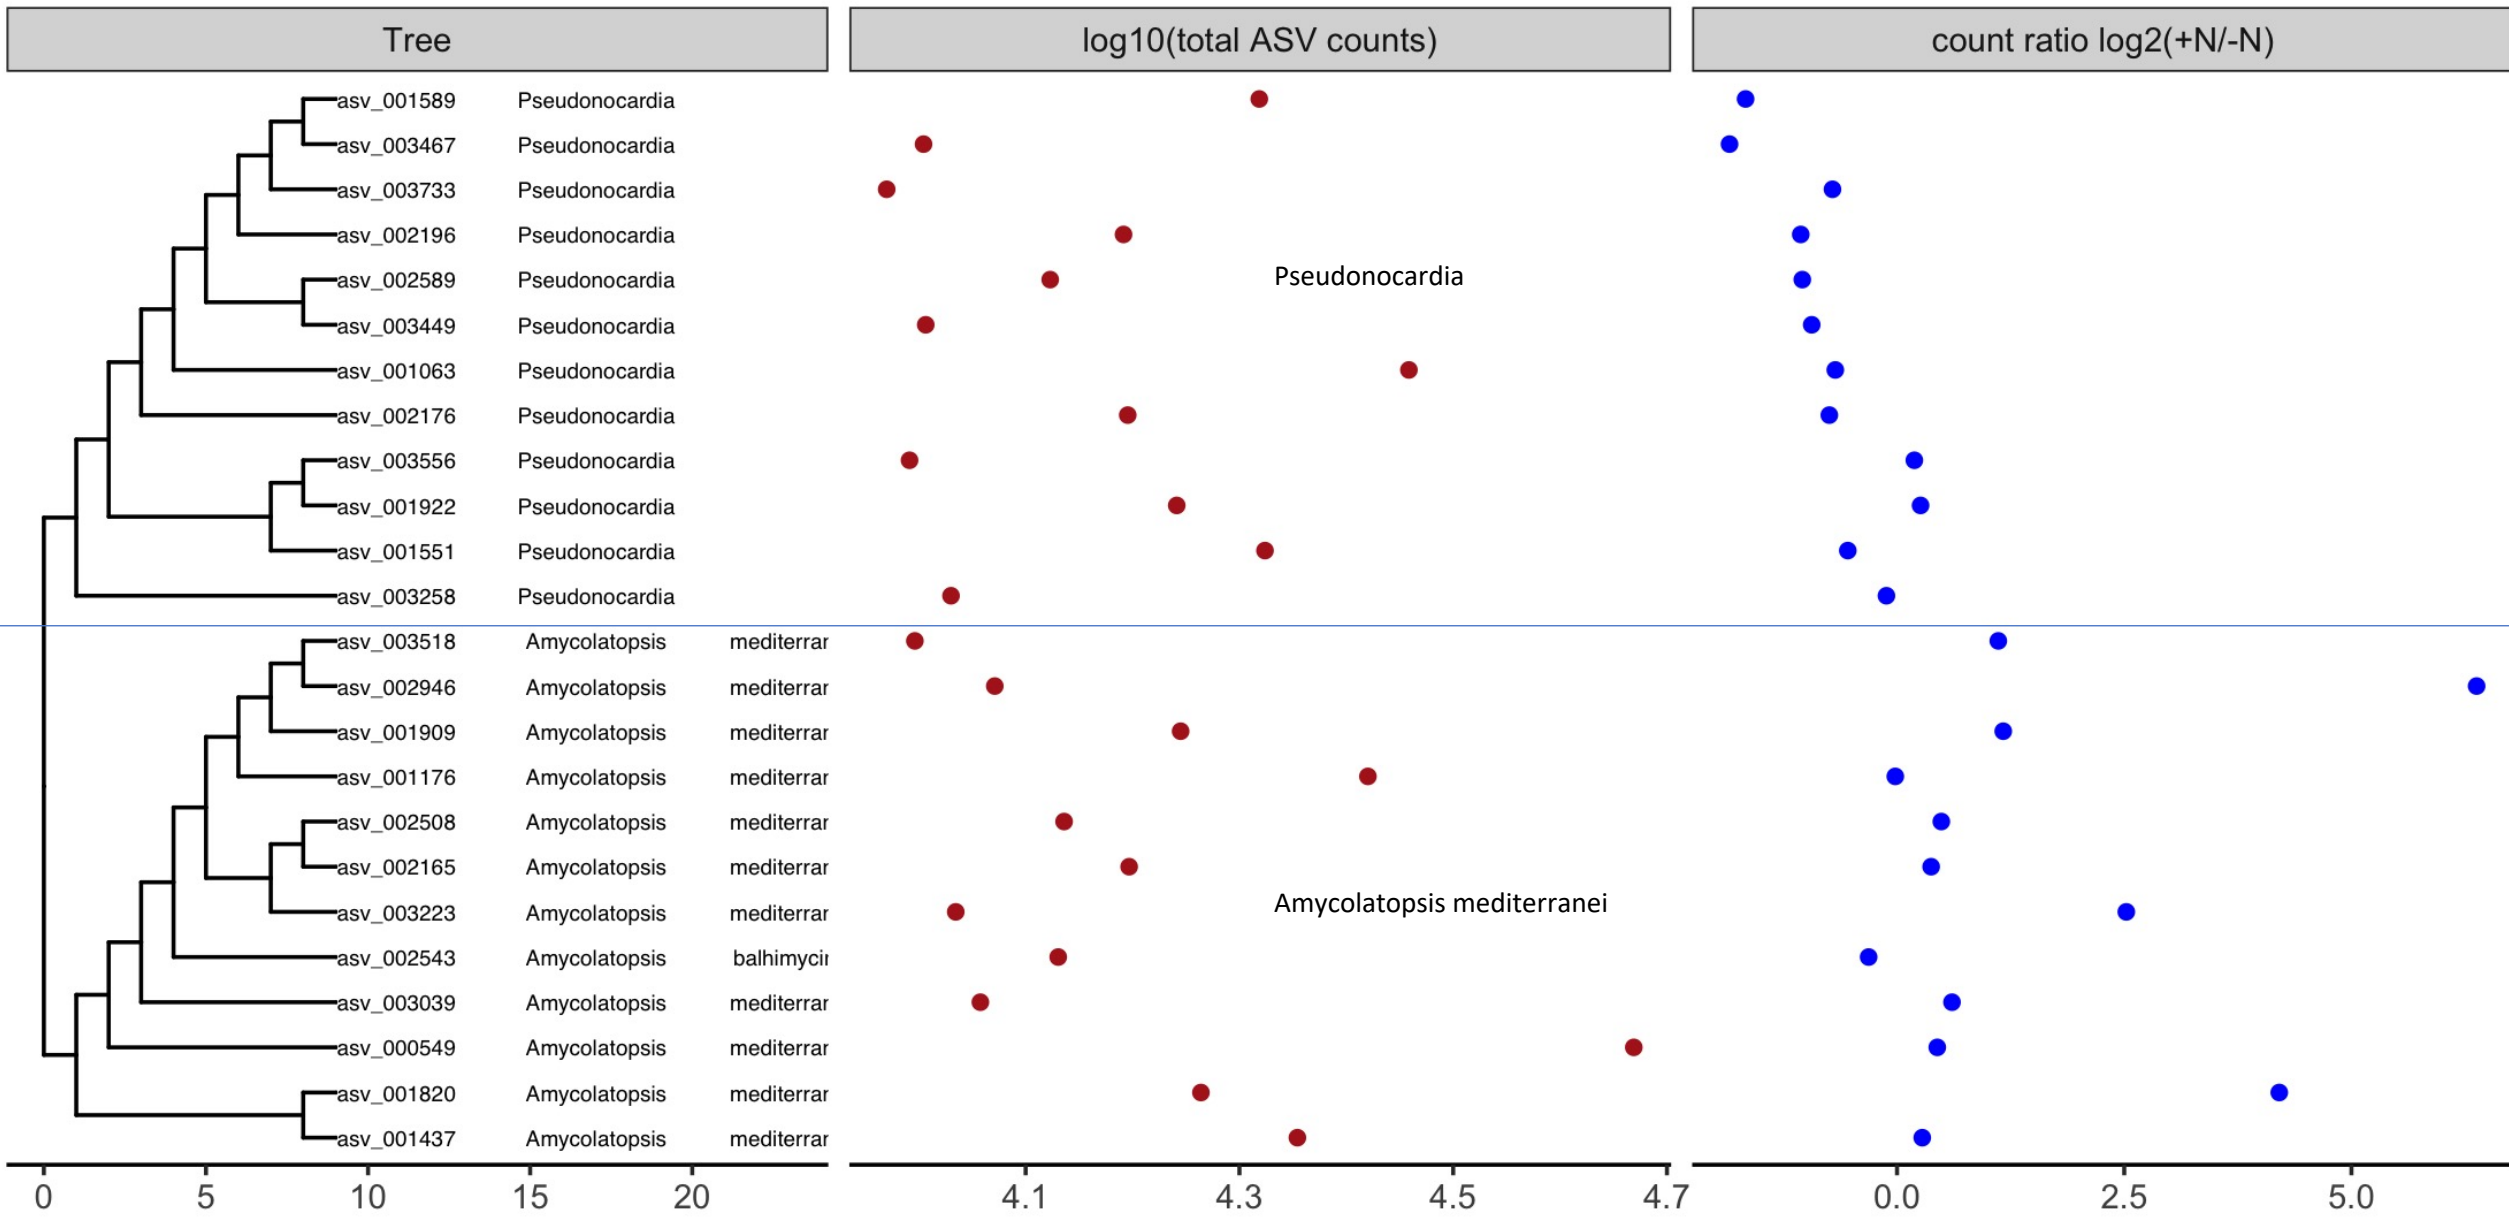

# Erwiniaceae

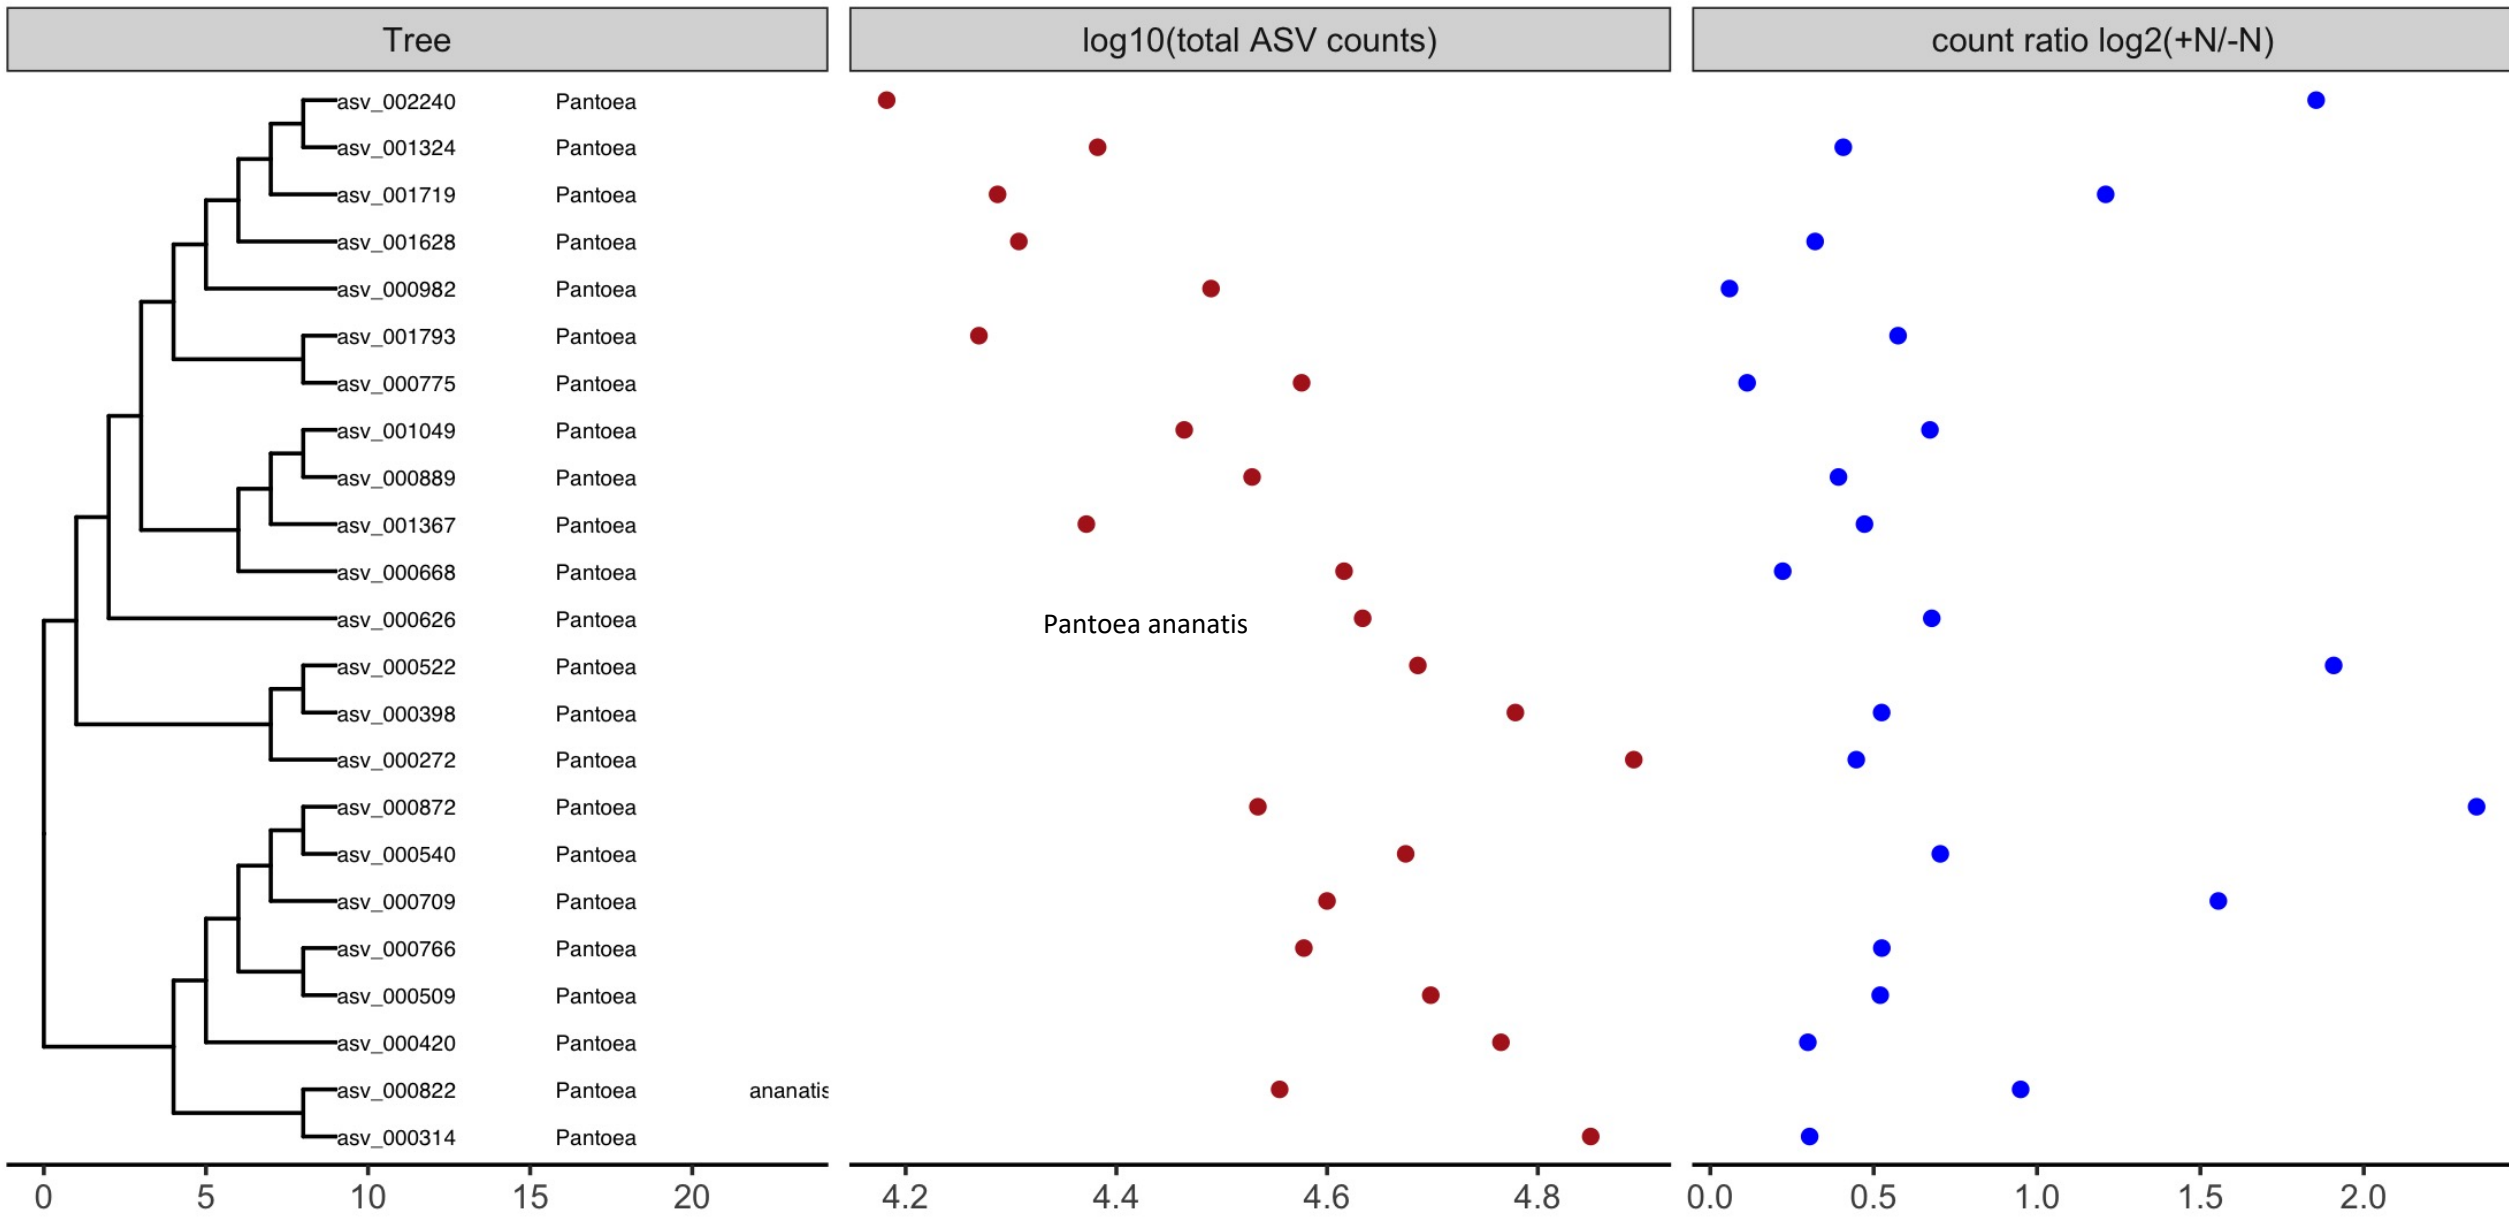

A21b

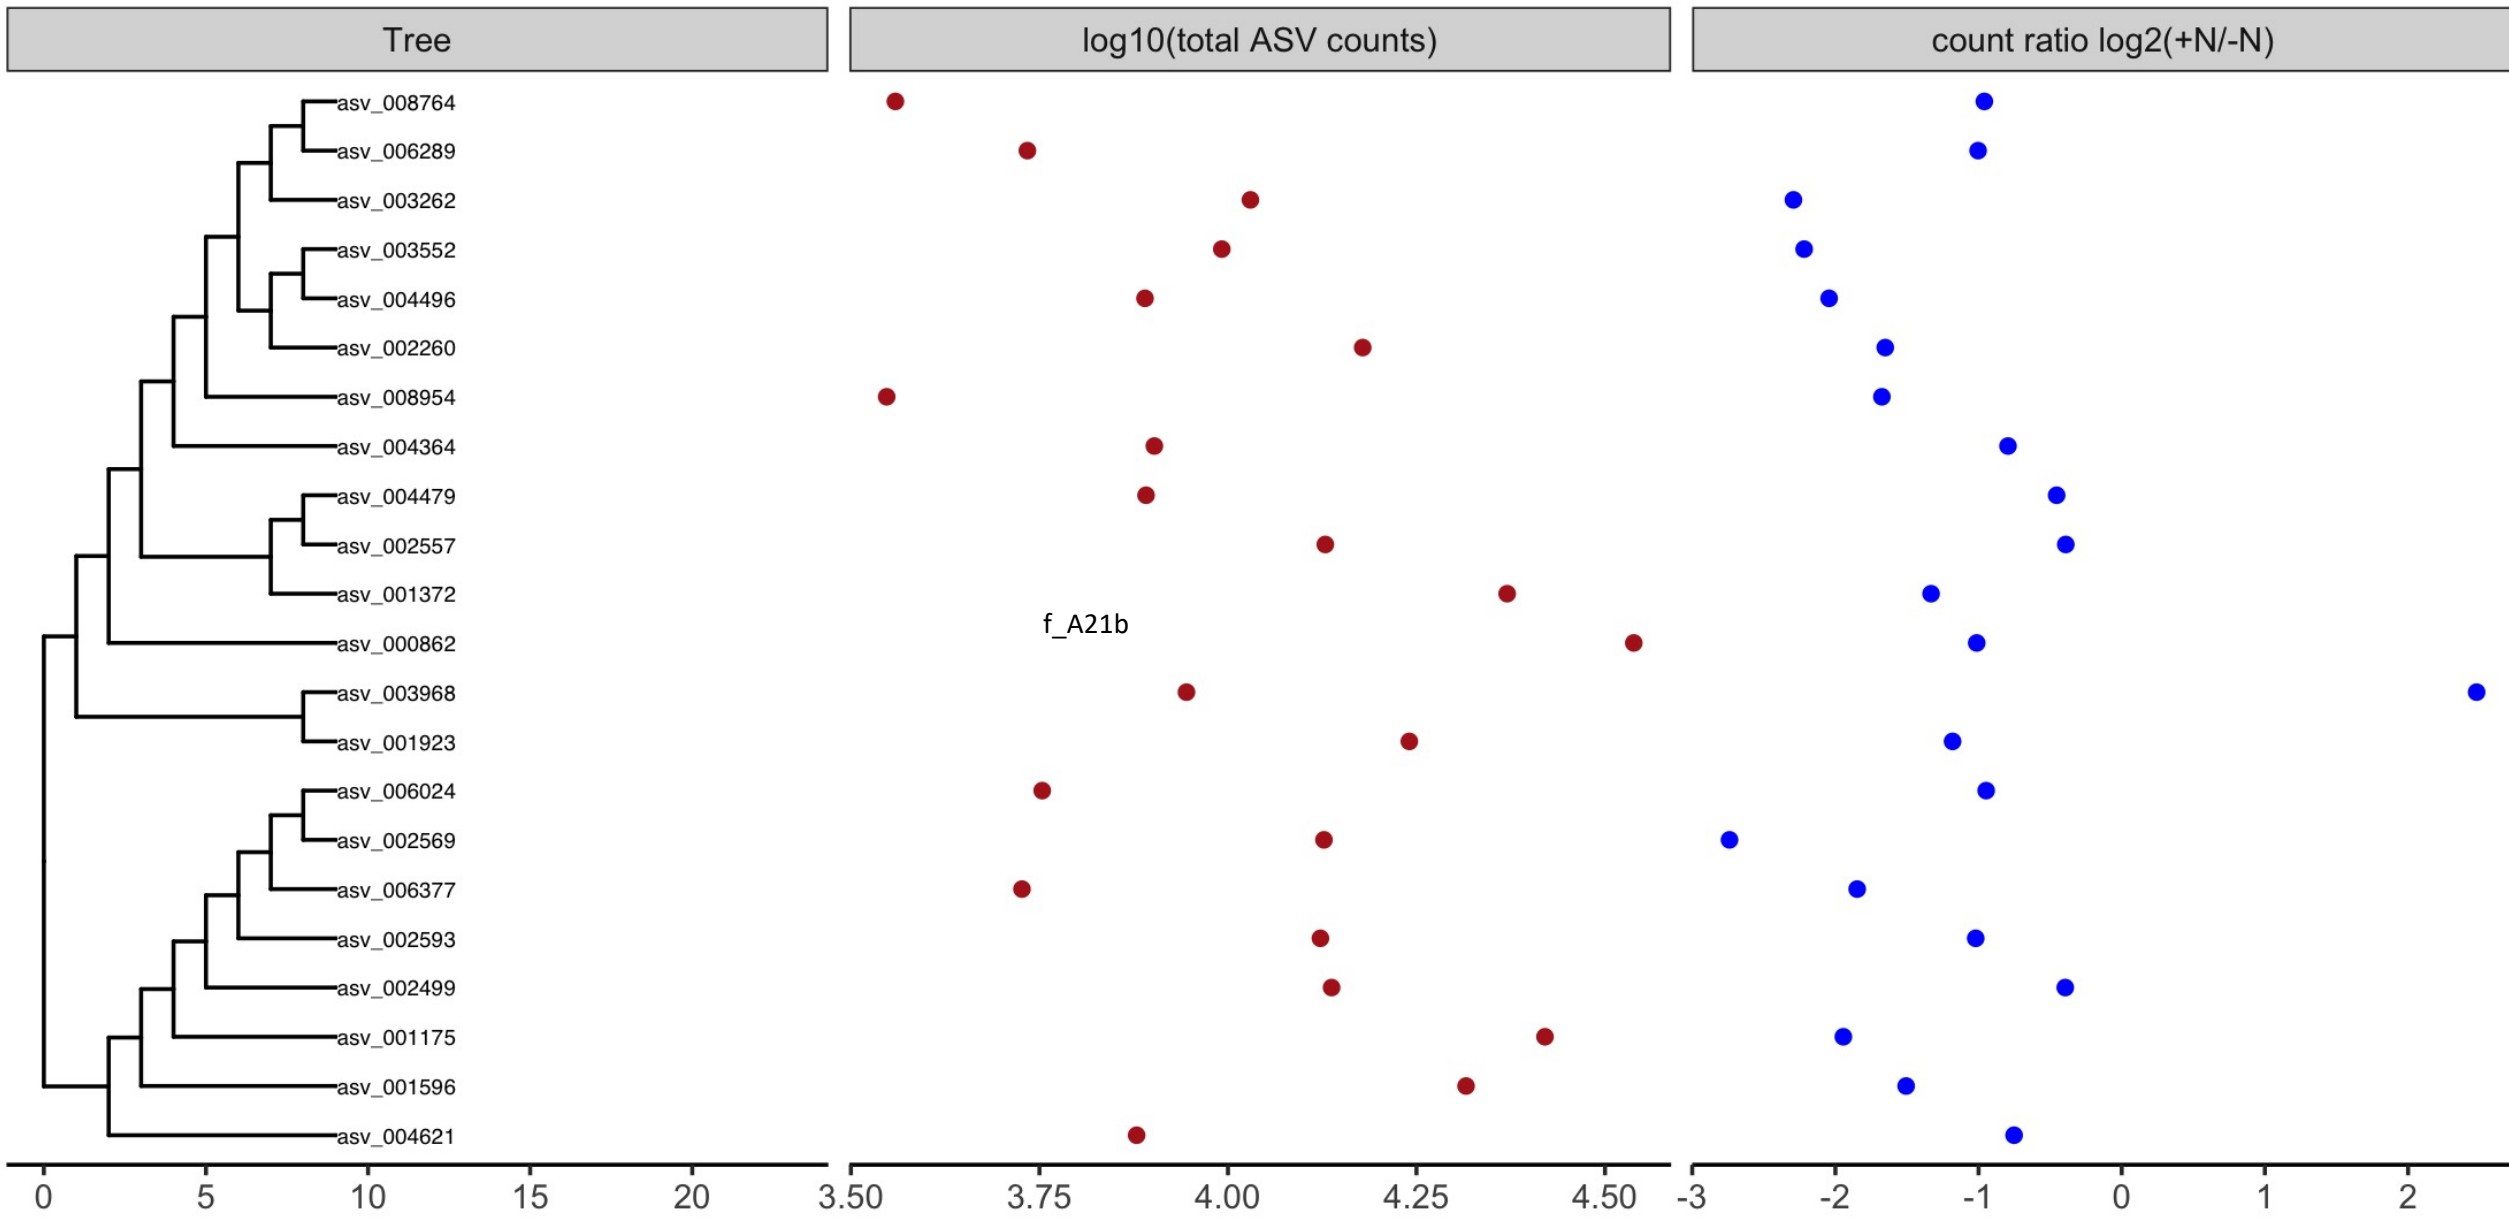



# Catenulisporaceae

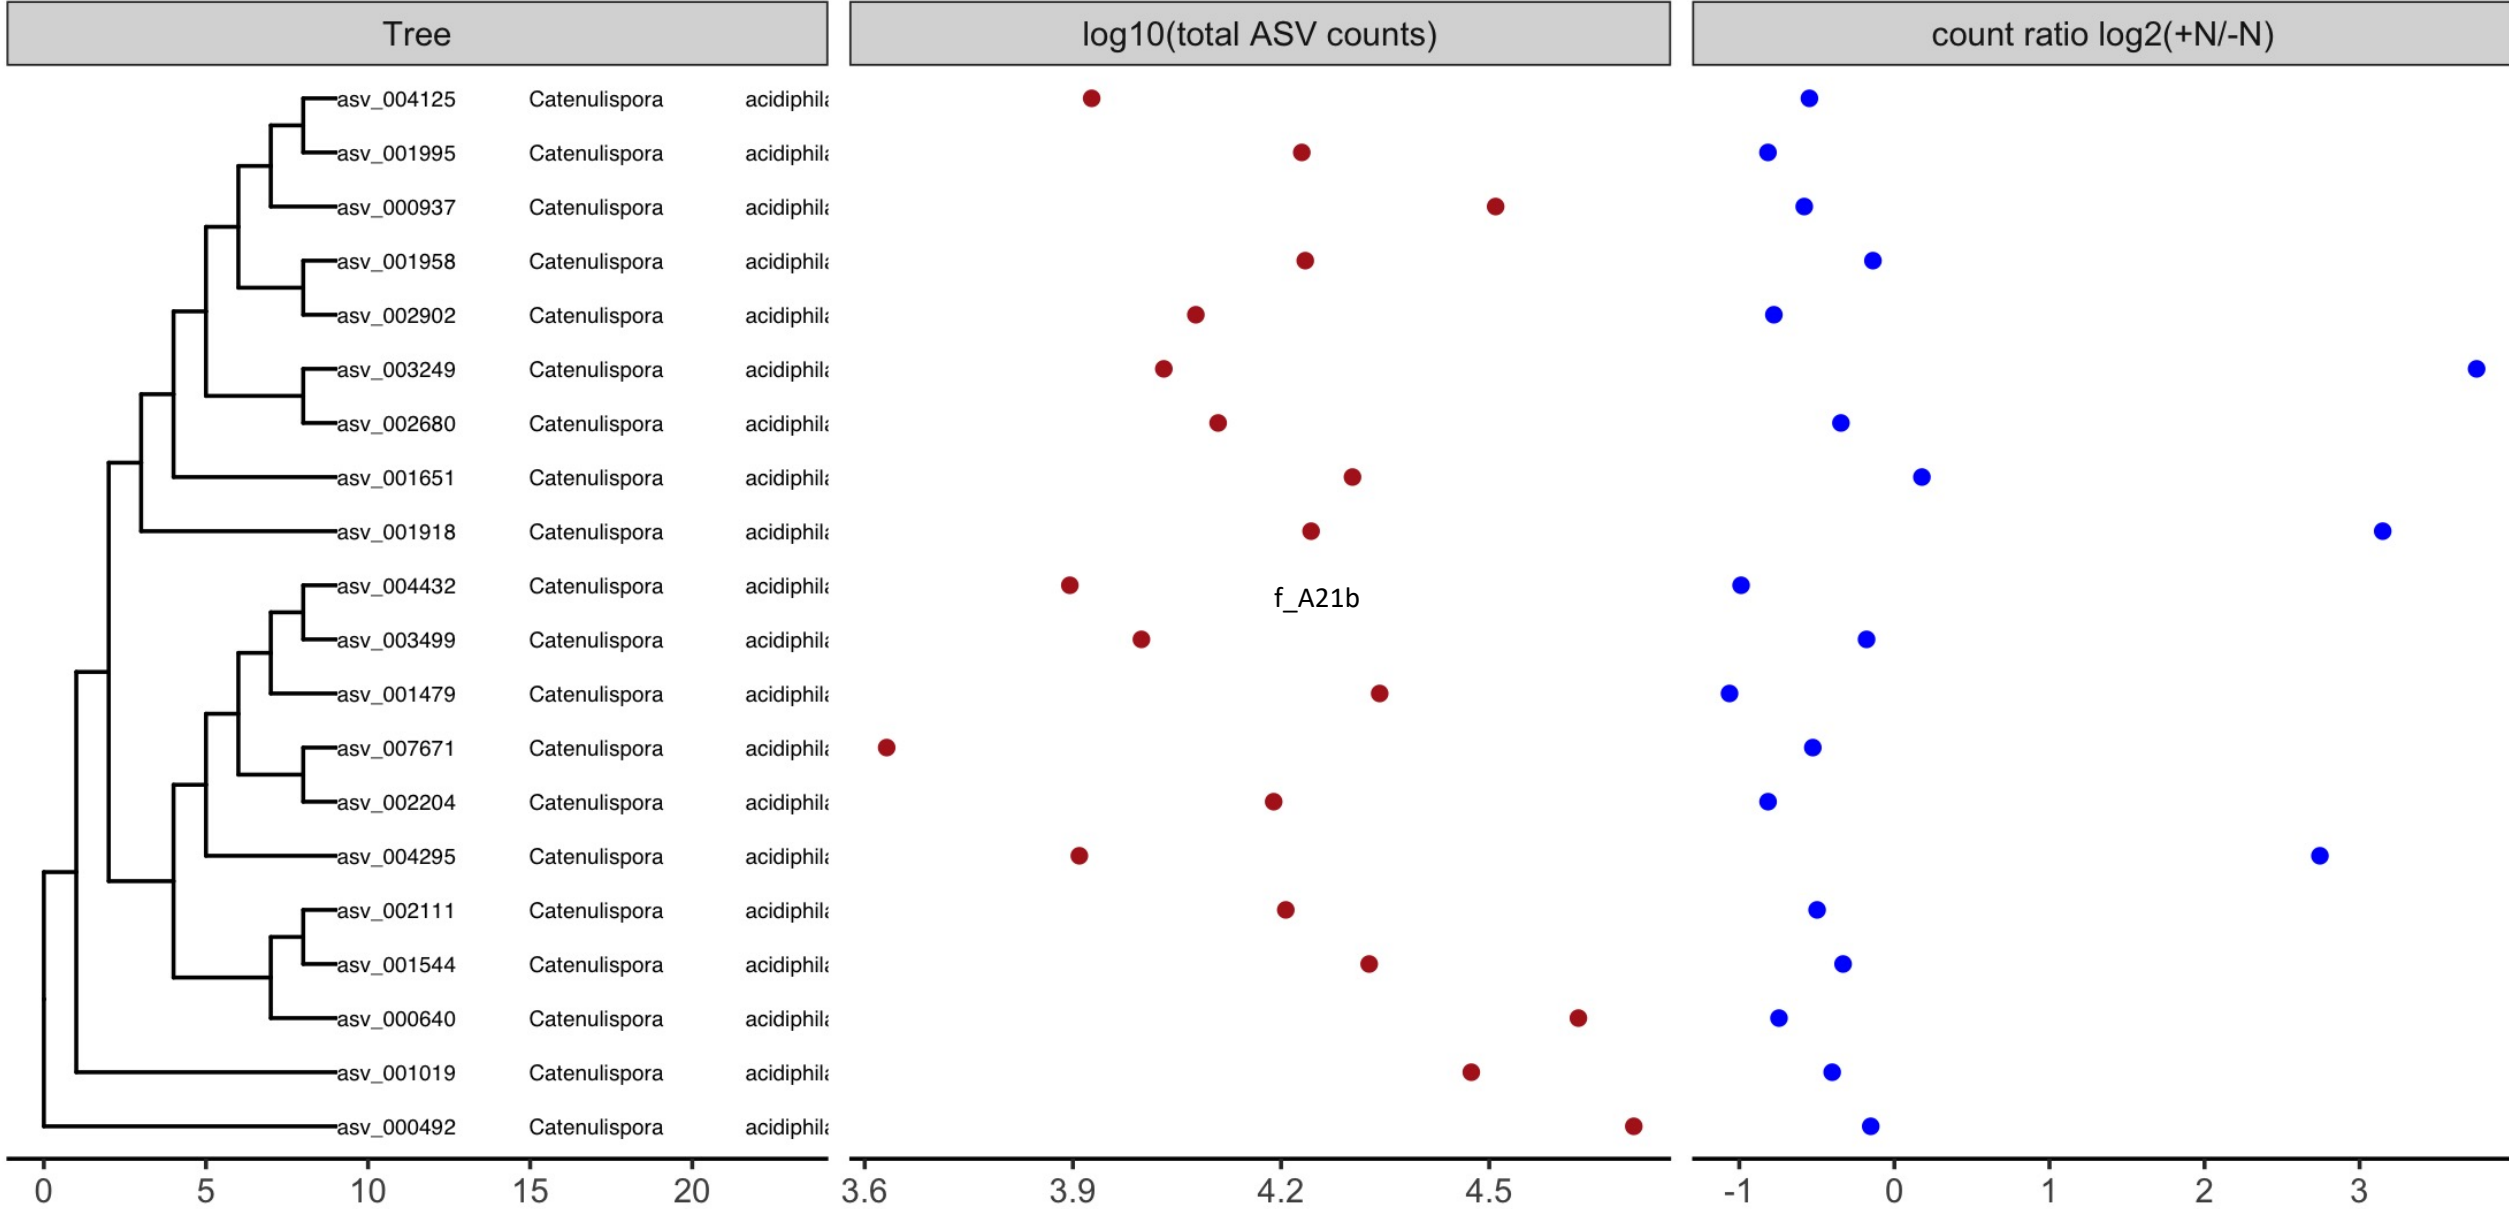

# Acidothermaceae

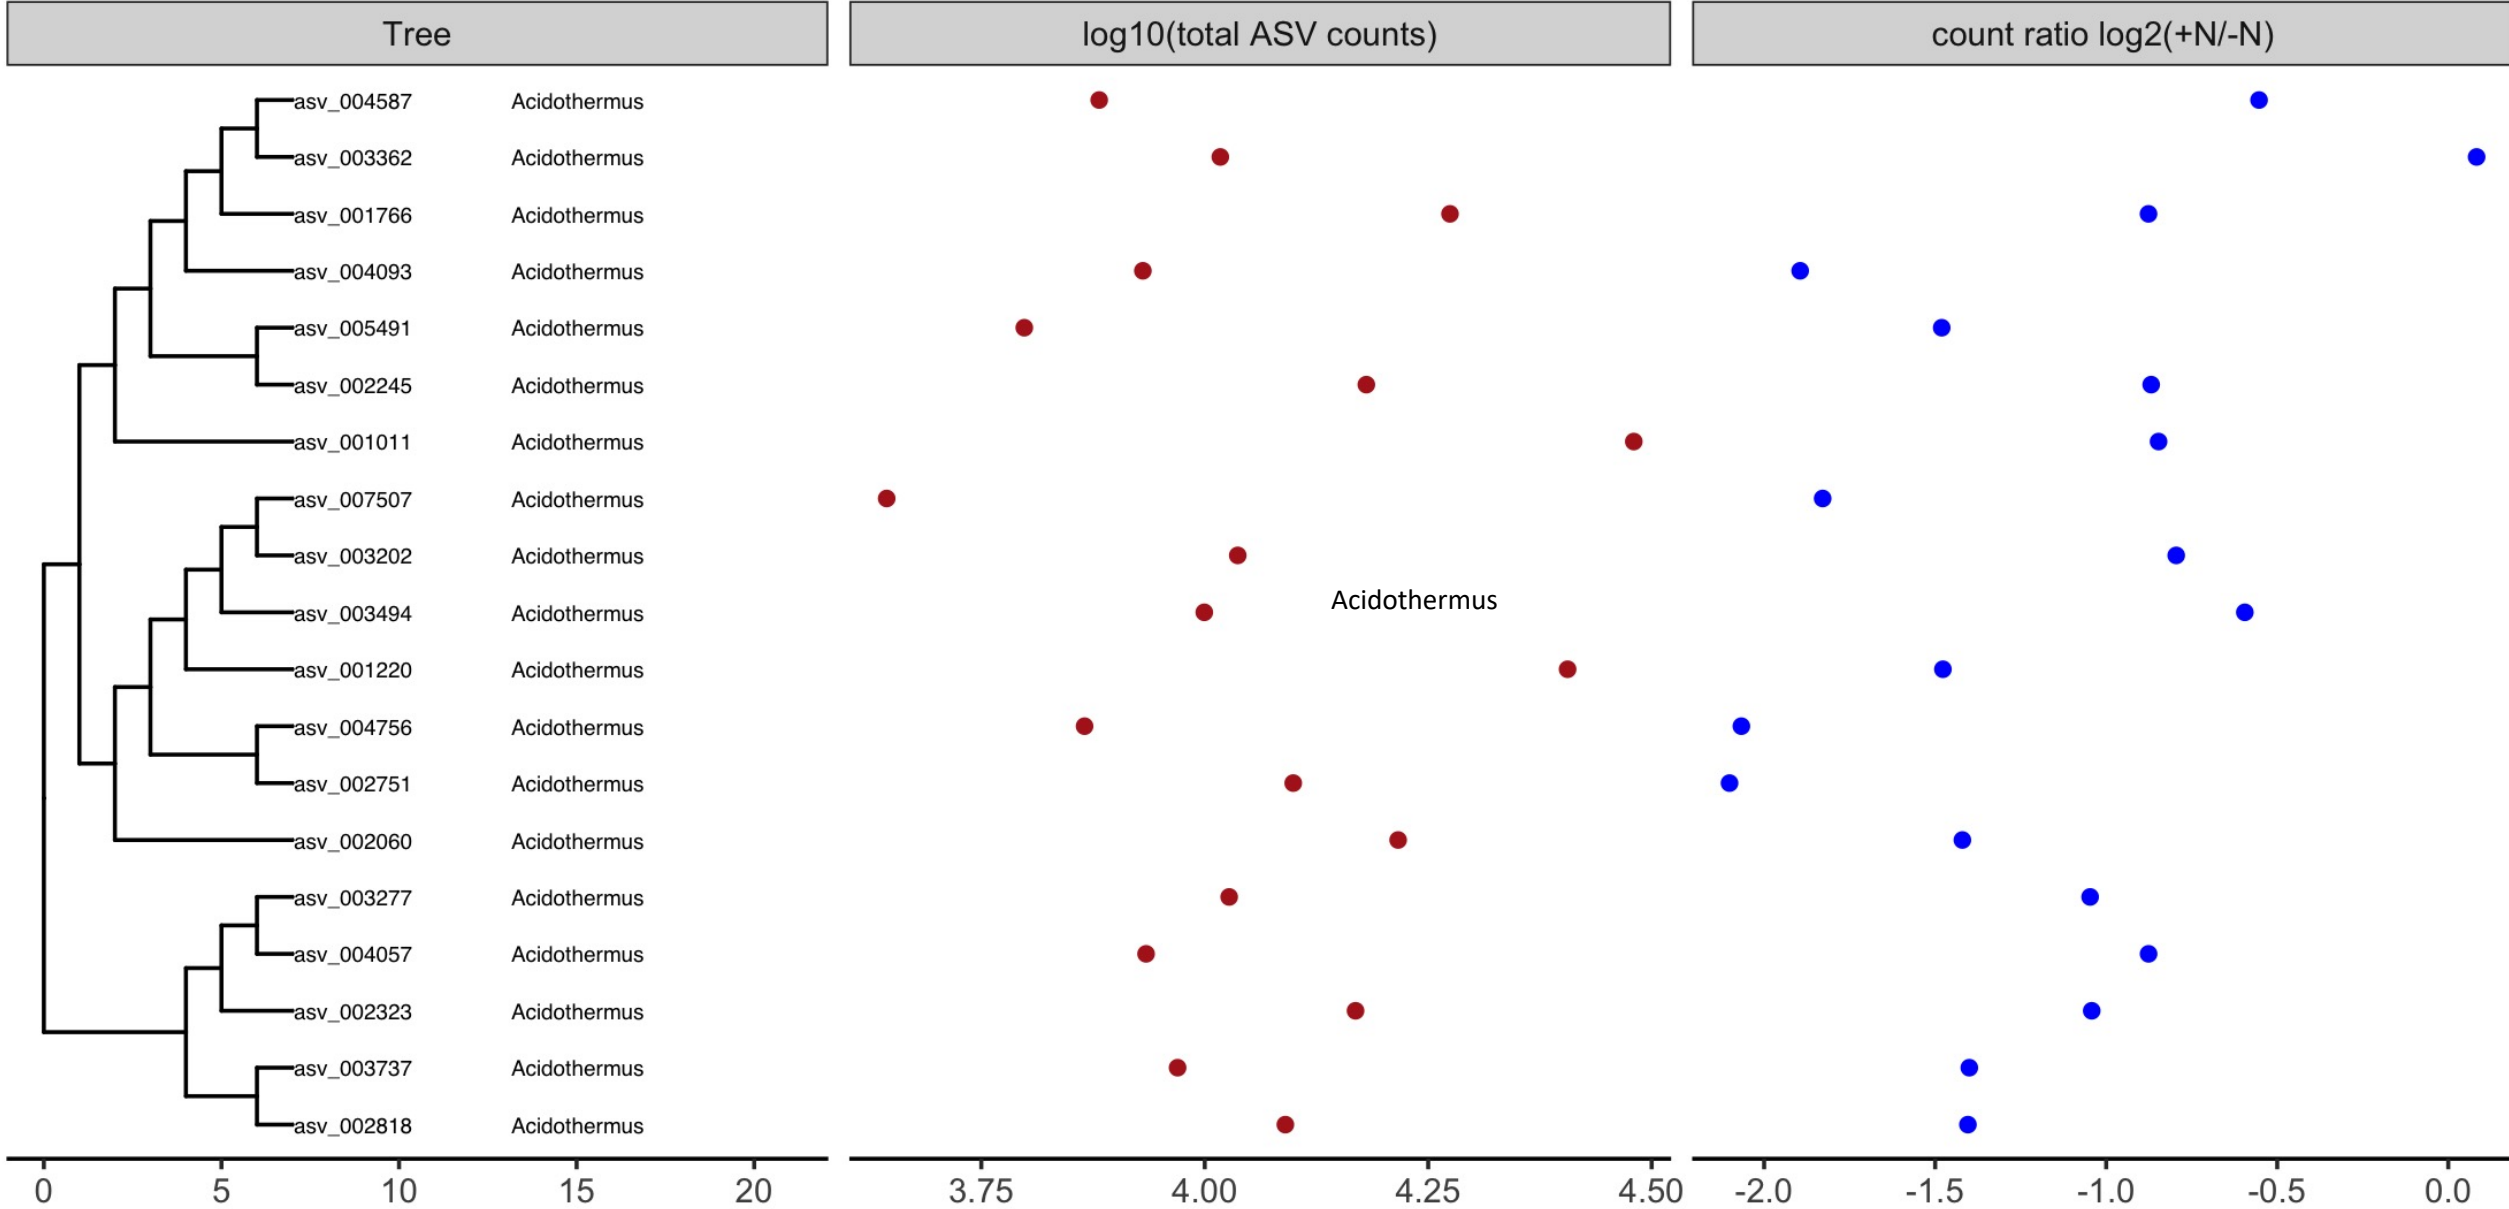

# Saccharimonadaceae

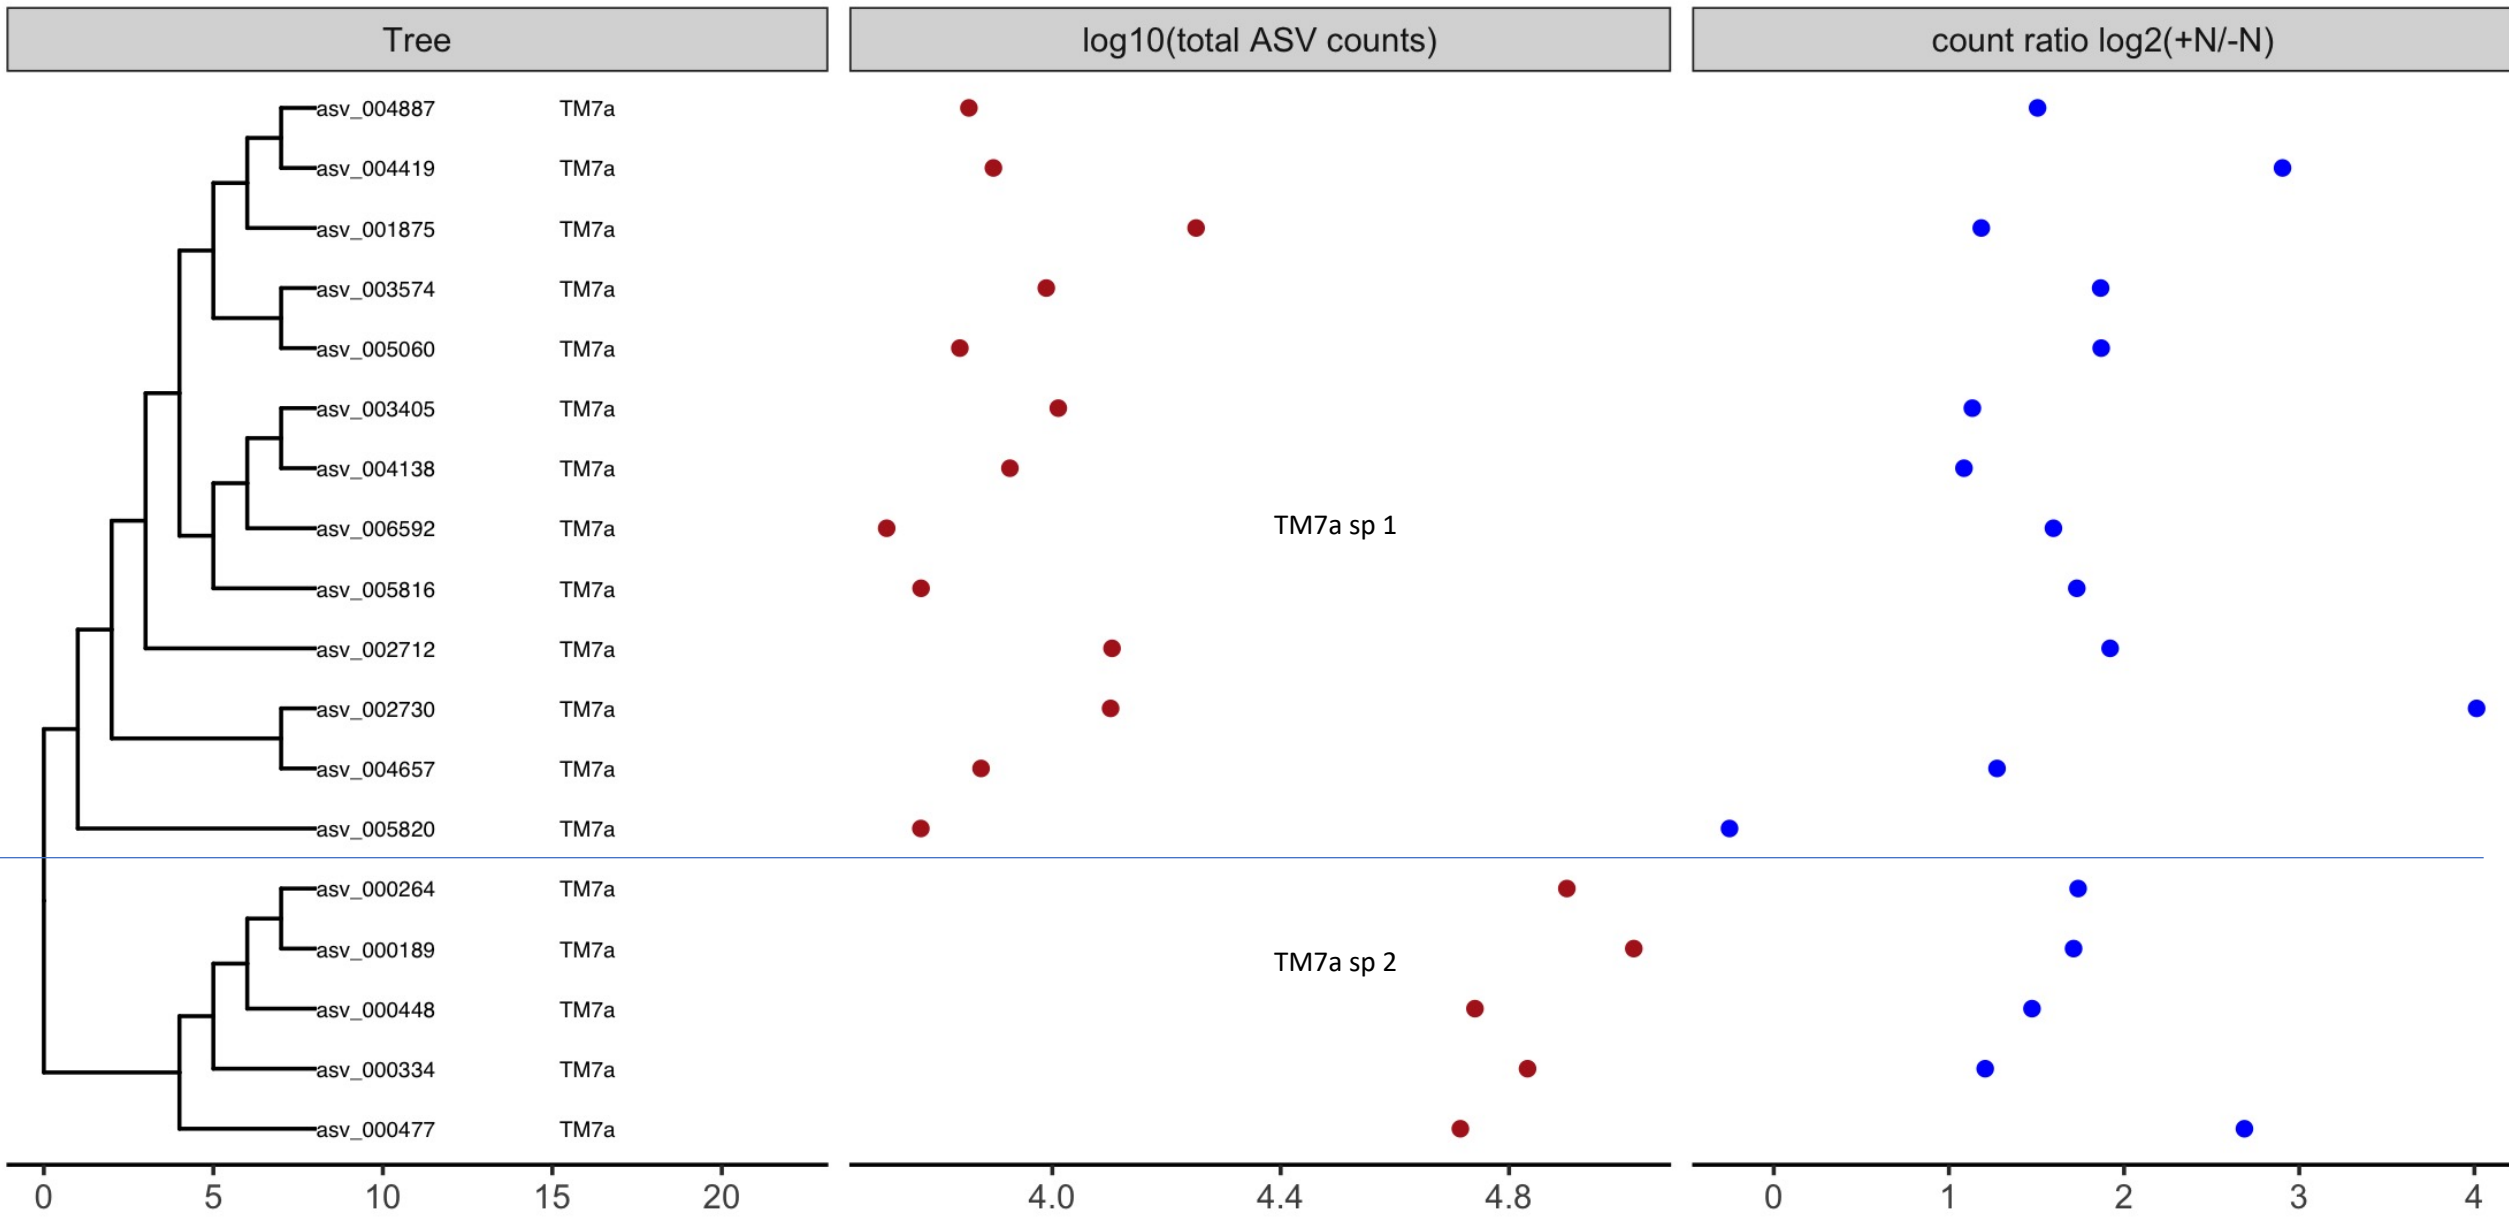

# Solirubrobacteraceae

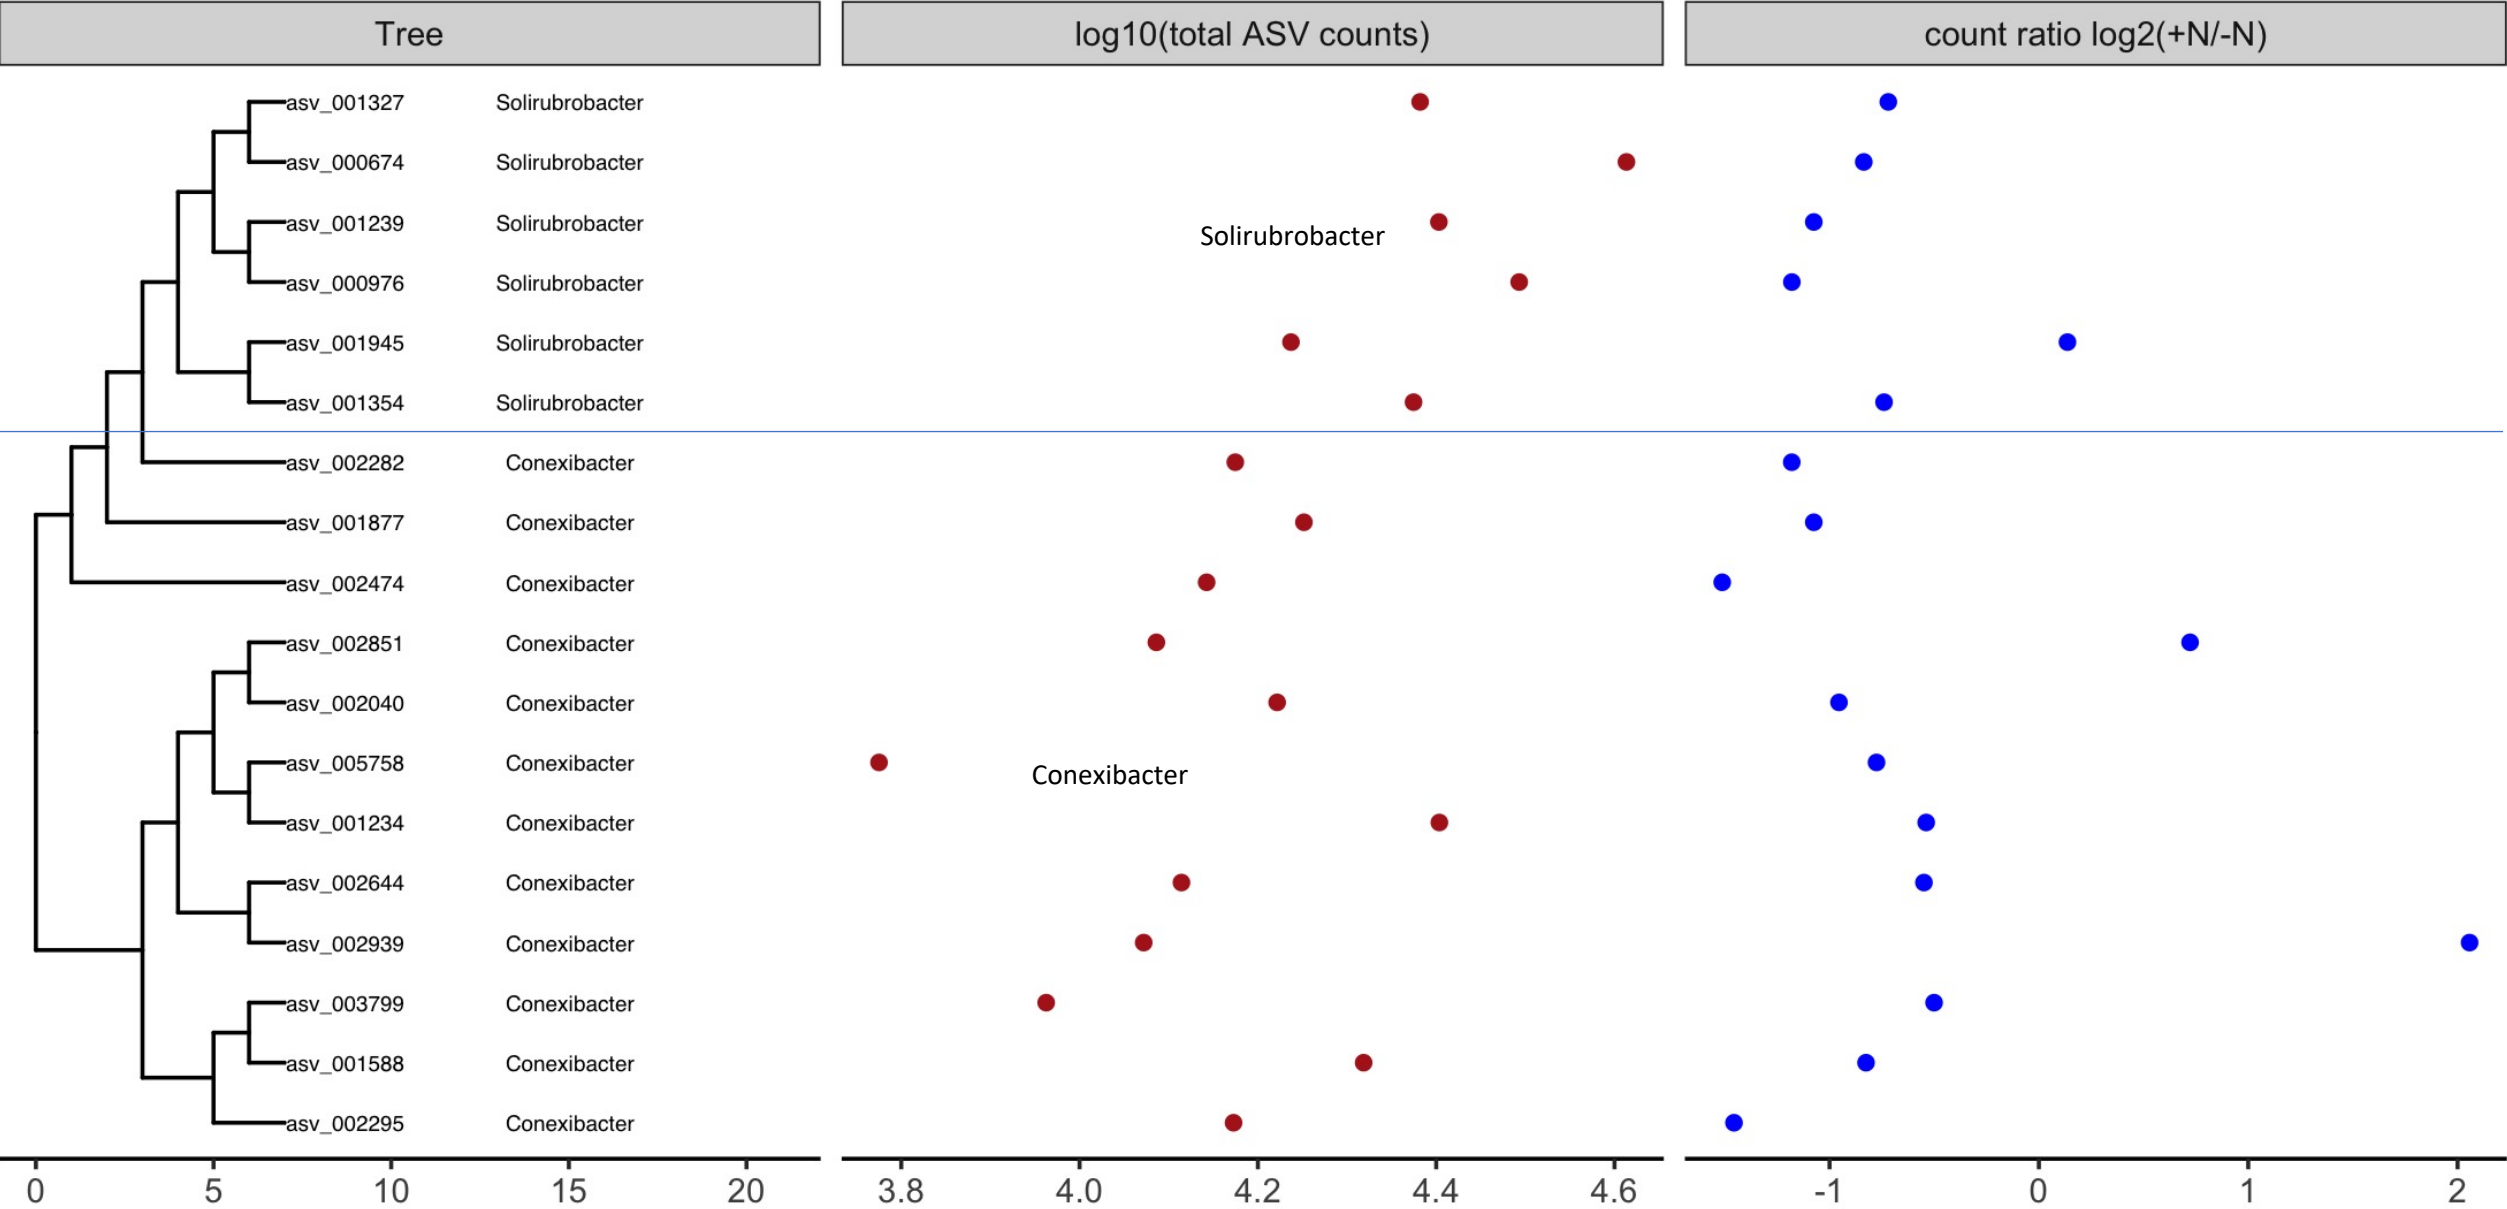

# Blastocatellaceae

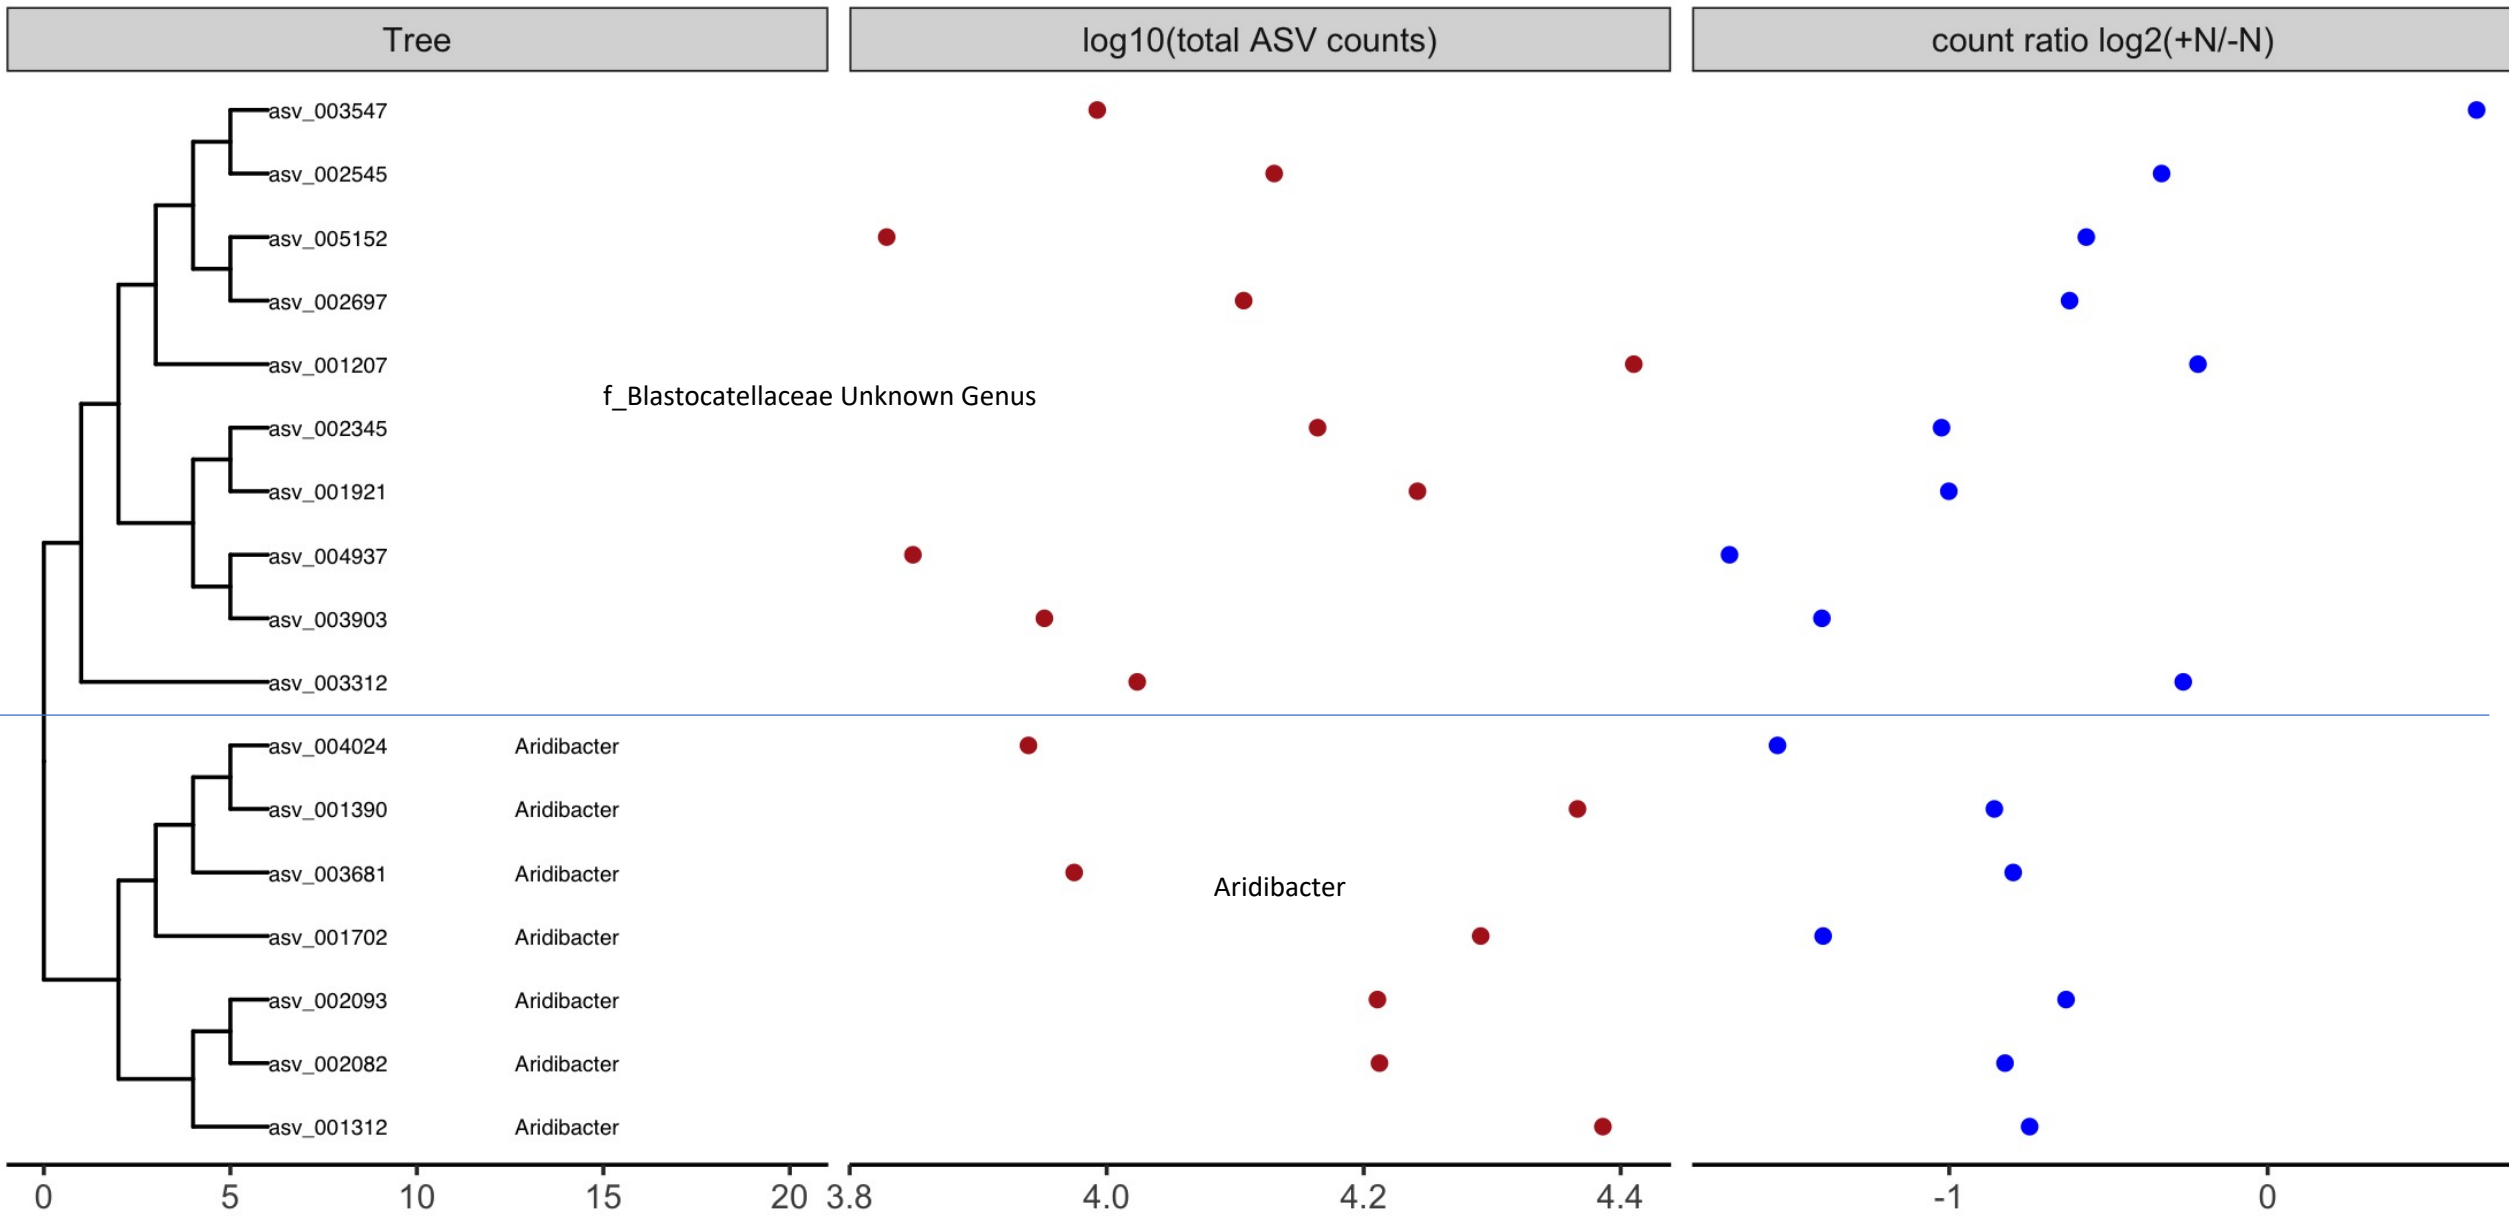



# Geodermatophilaceae

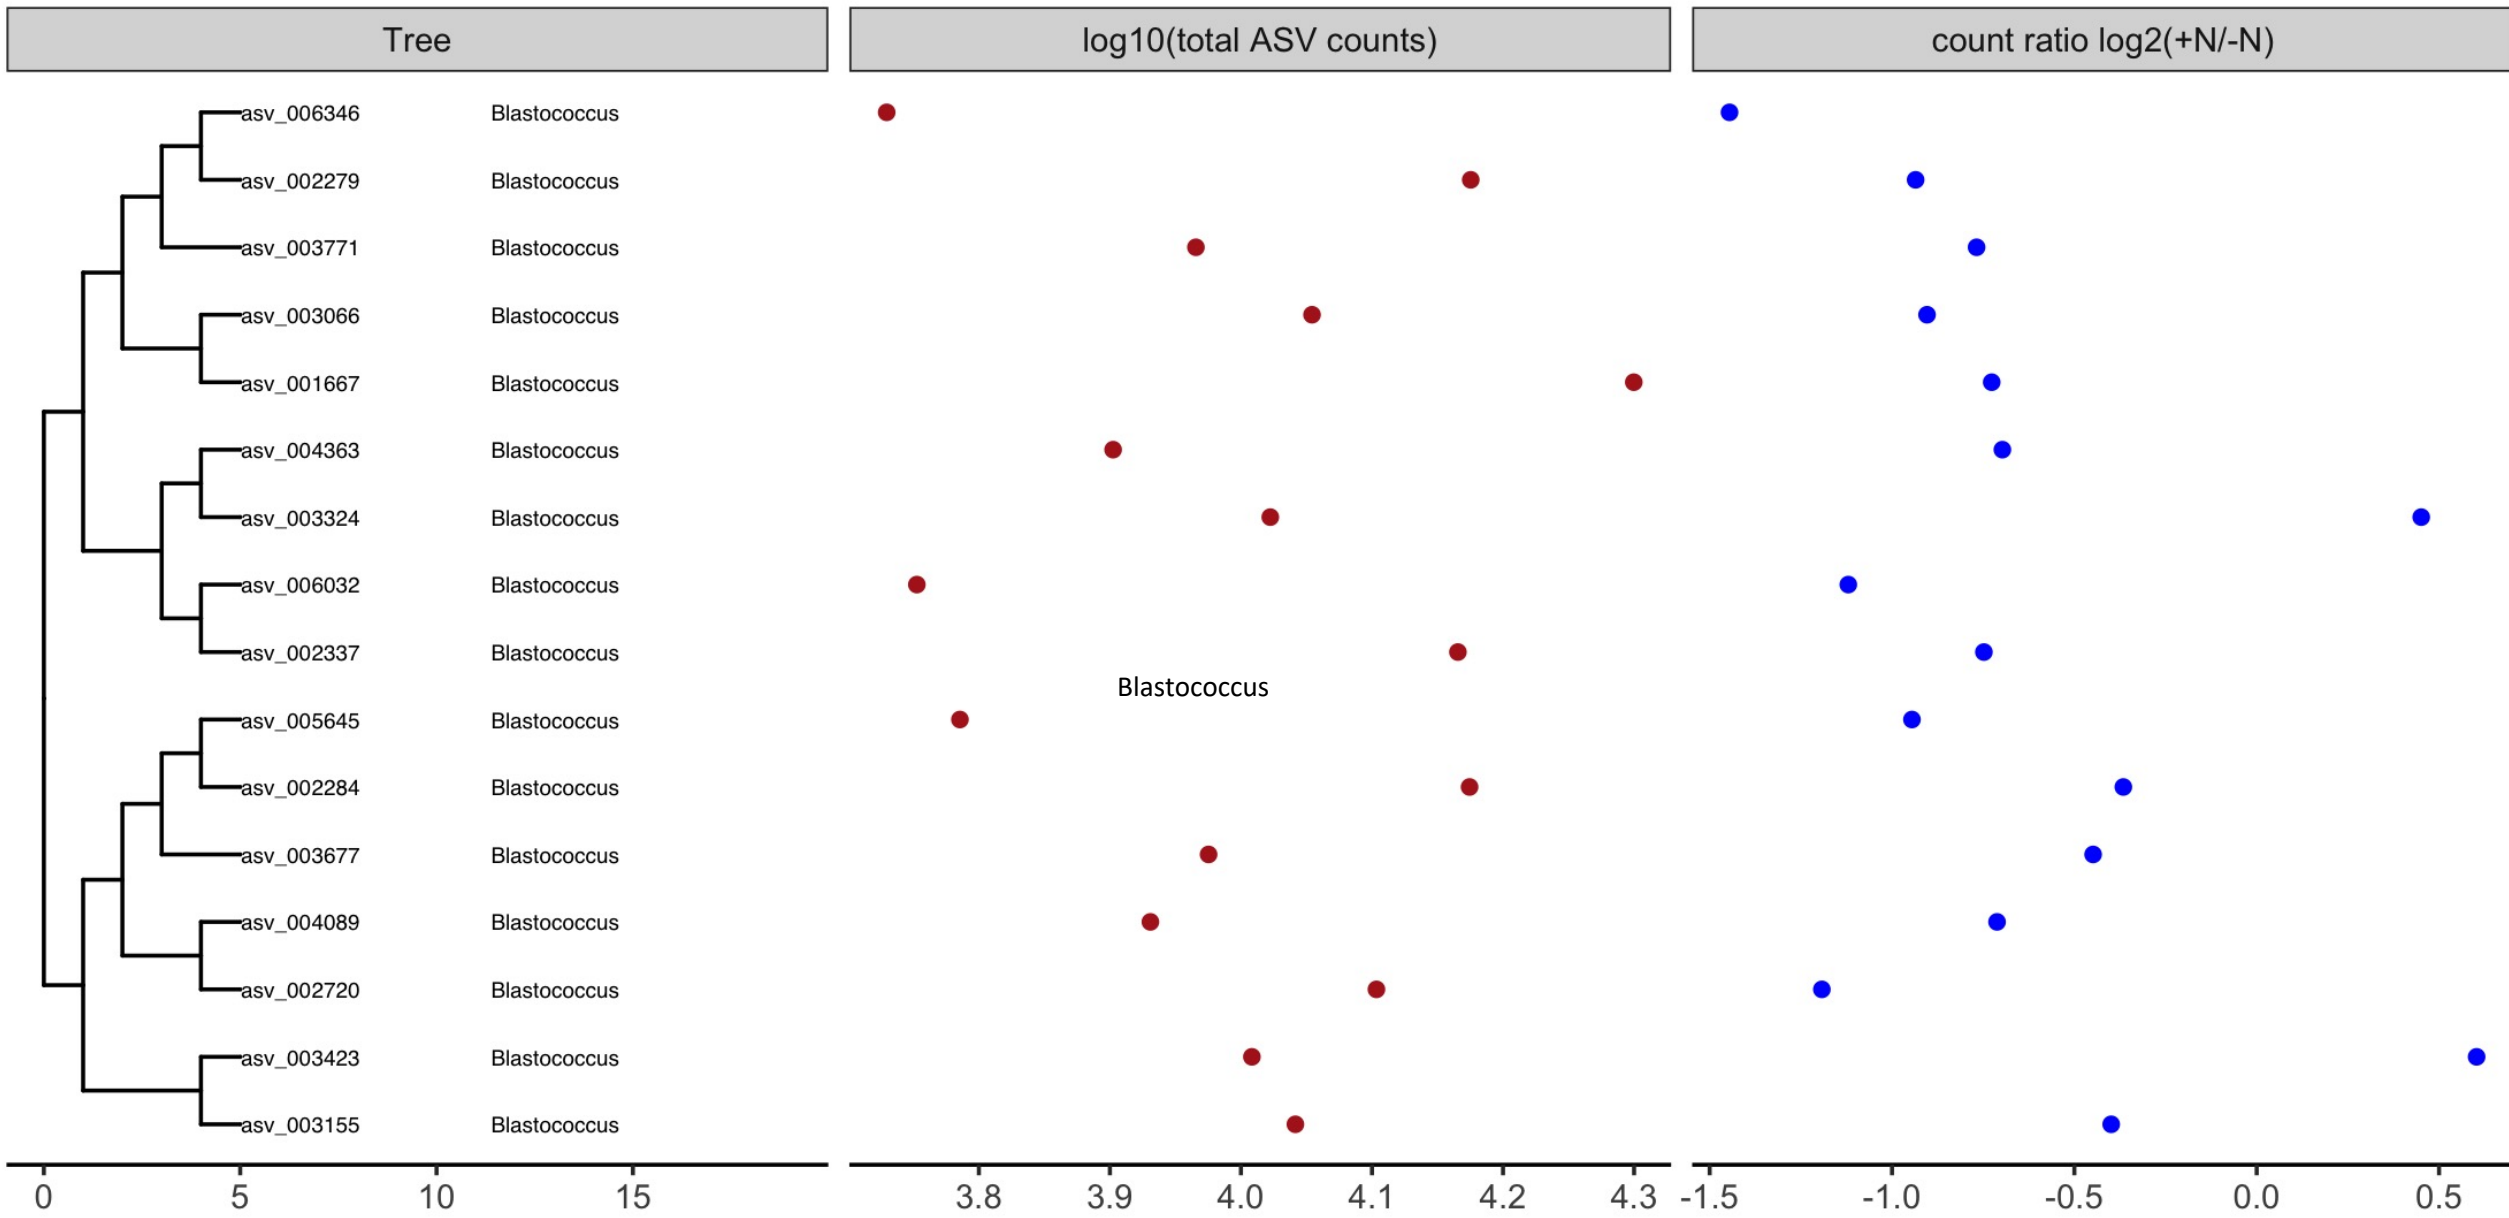

# Gemmatimonadaceae

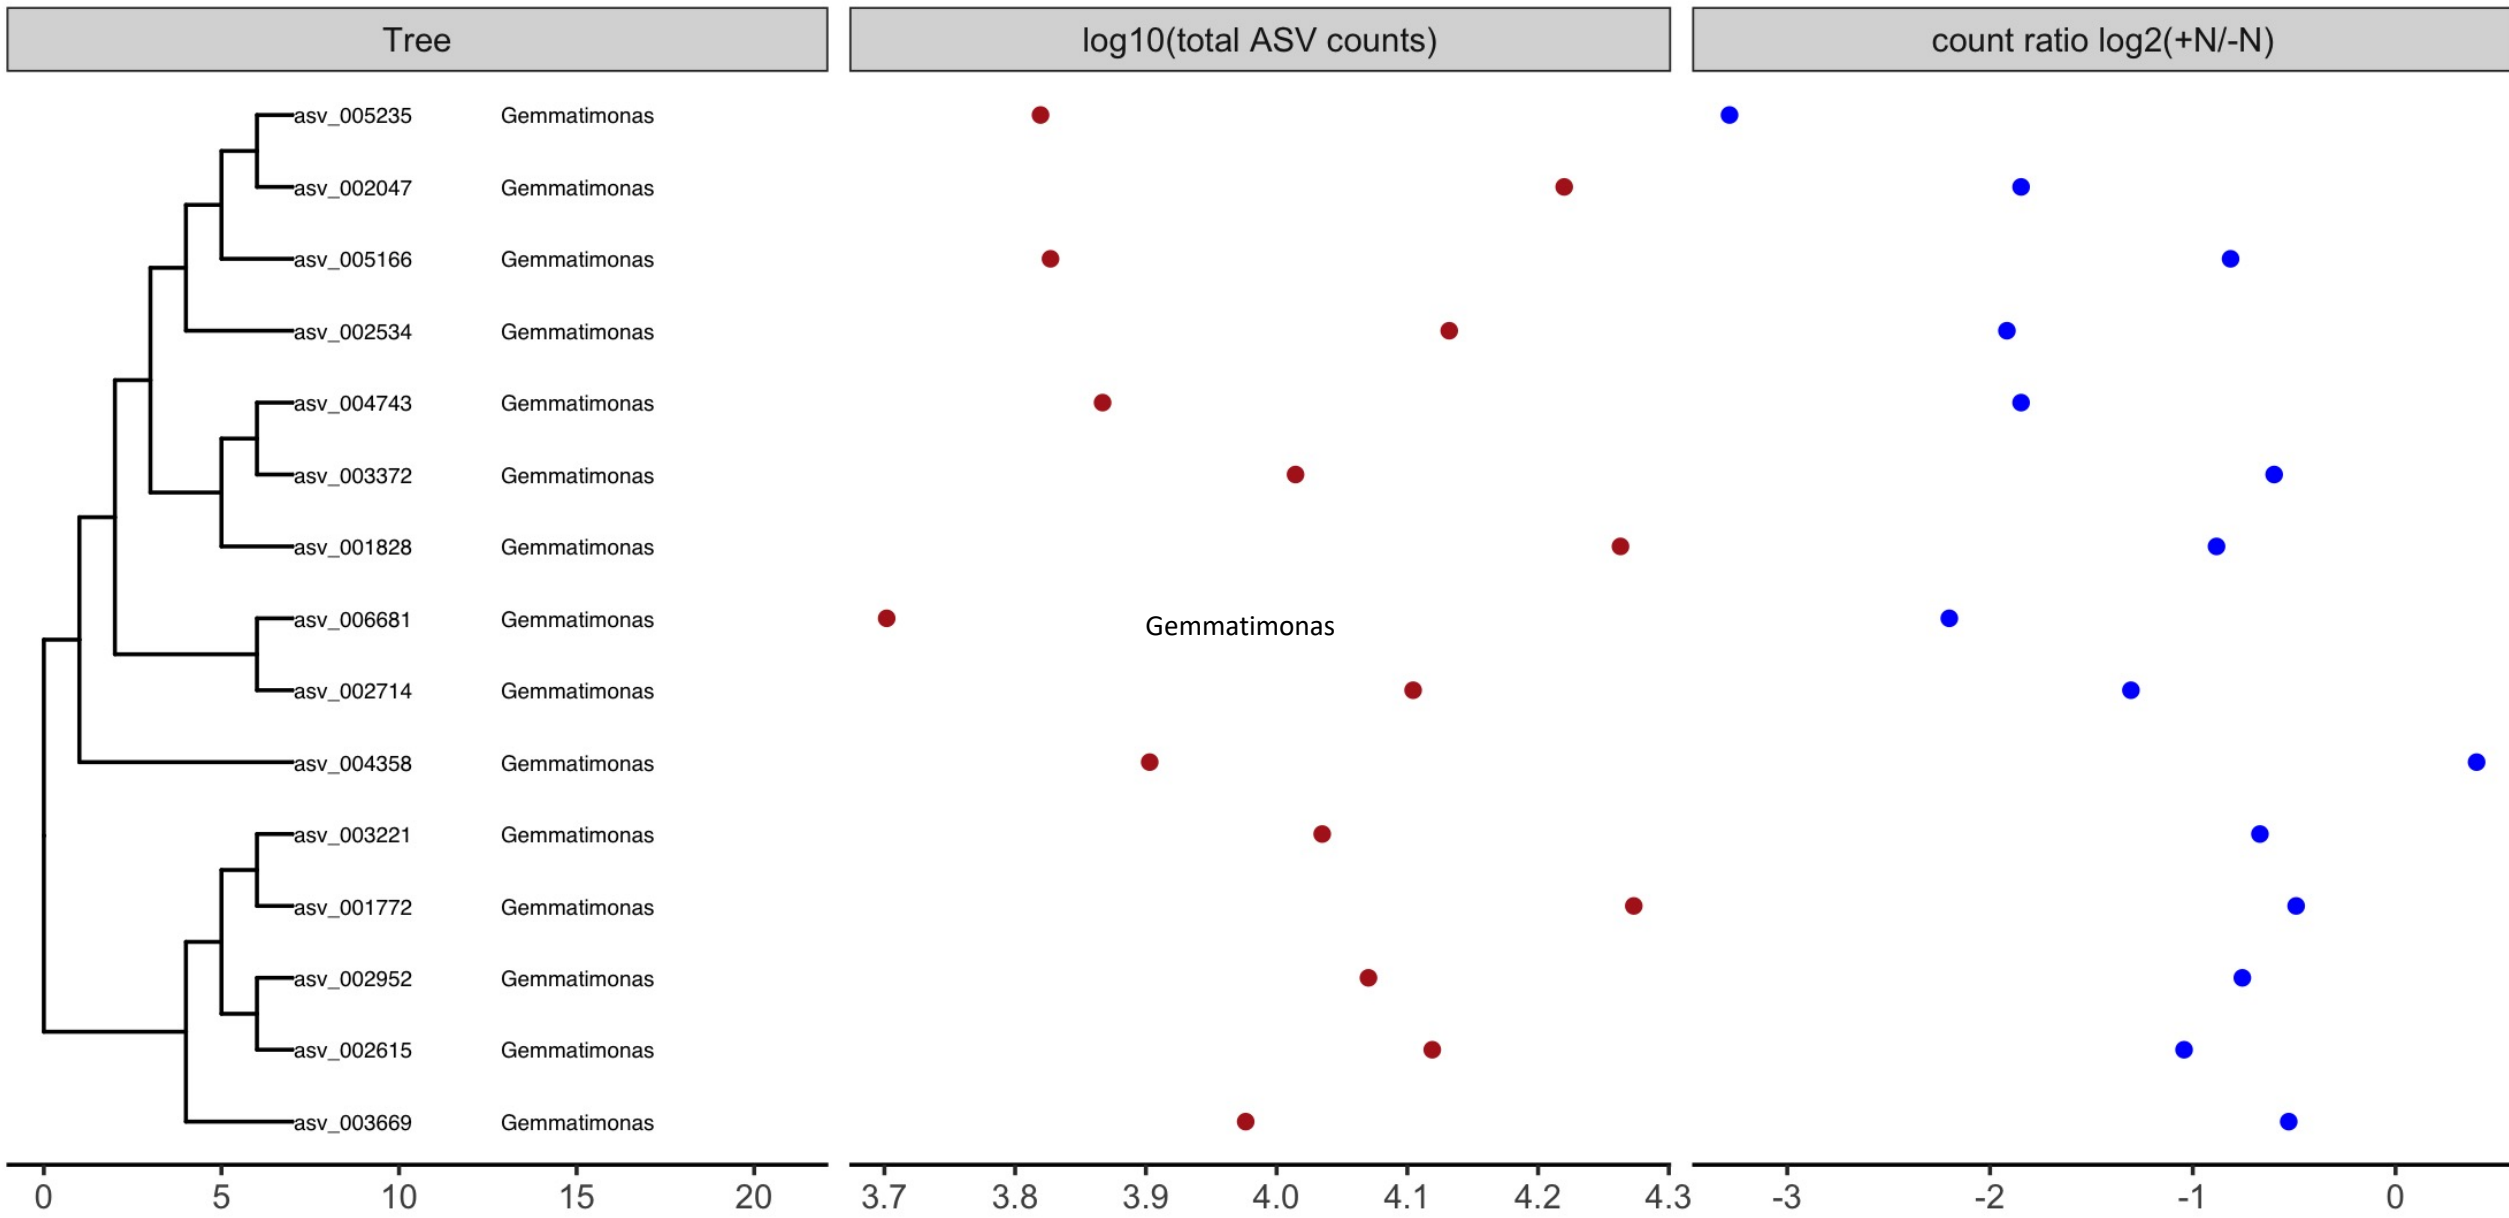

JG30-KF-AS9

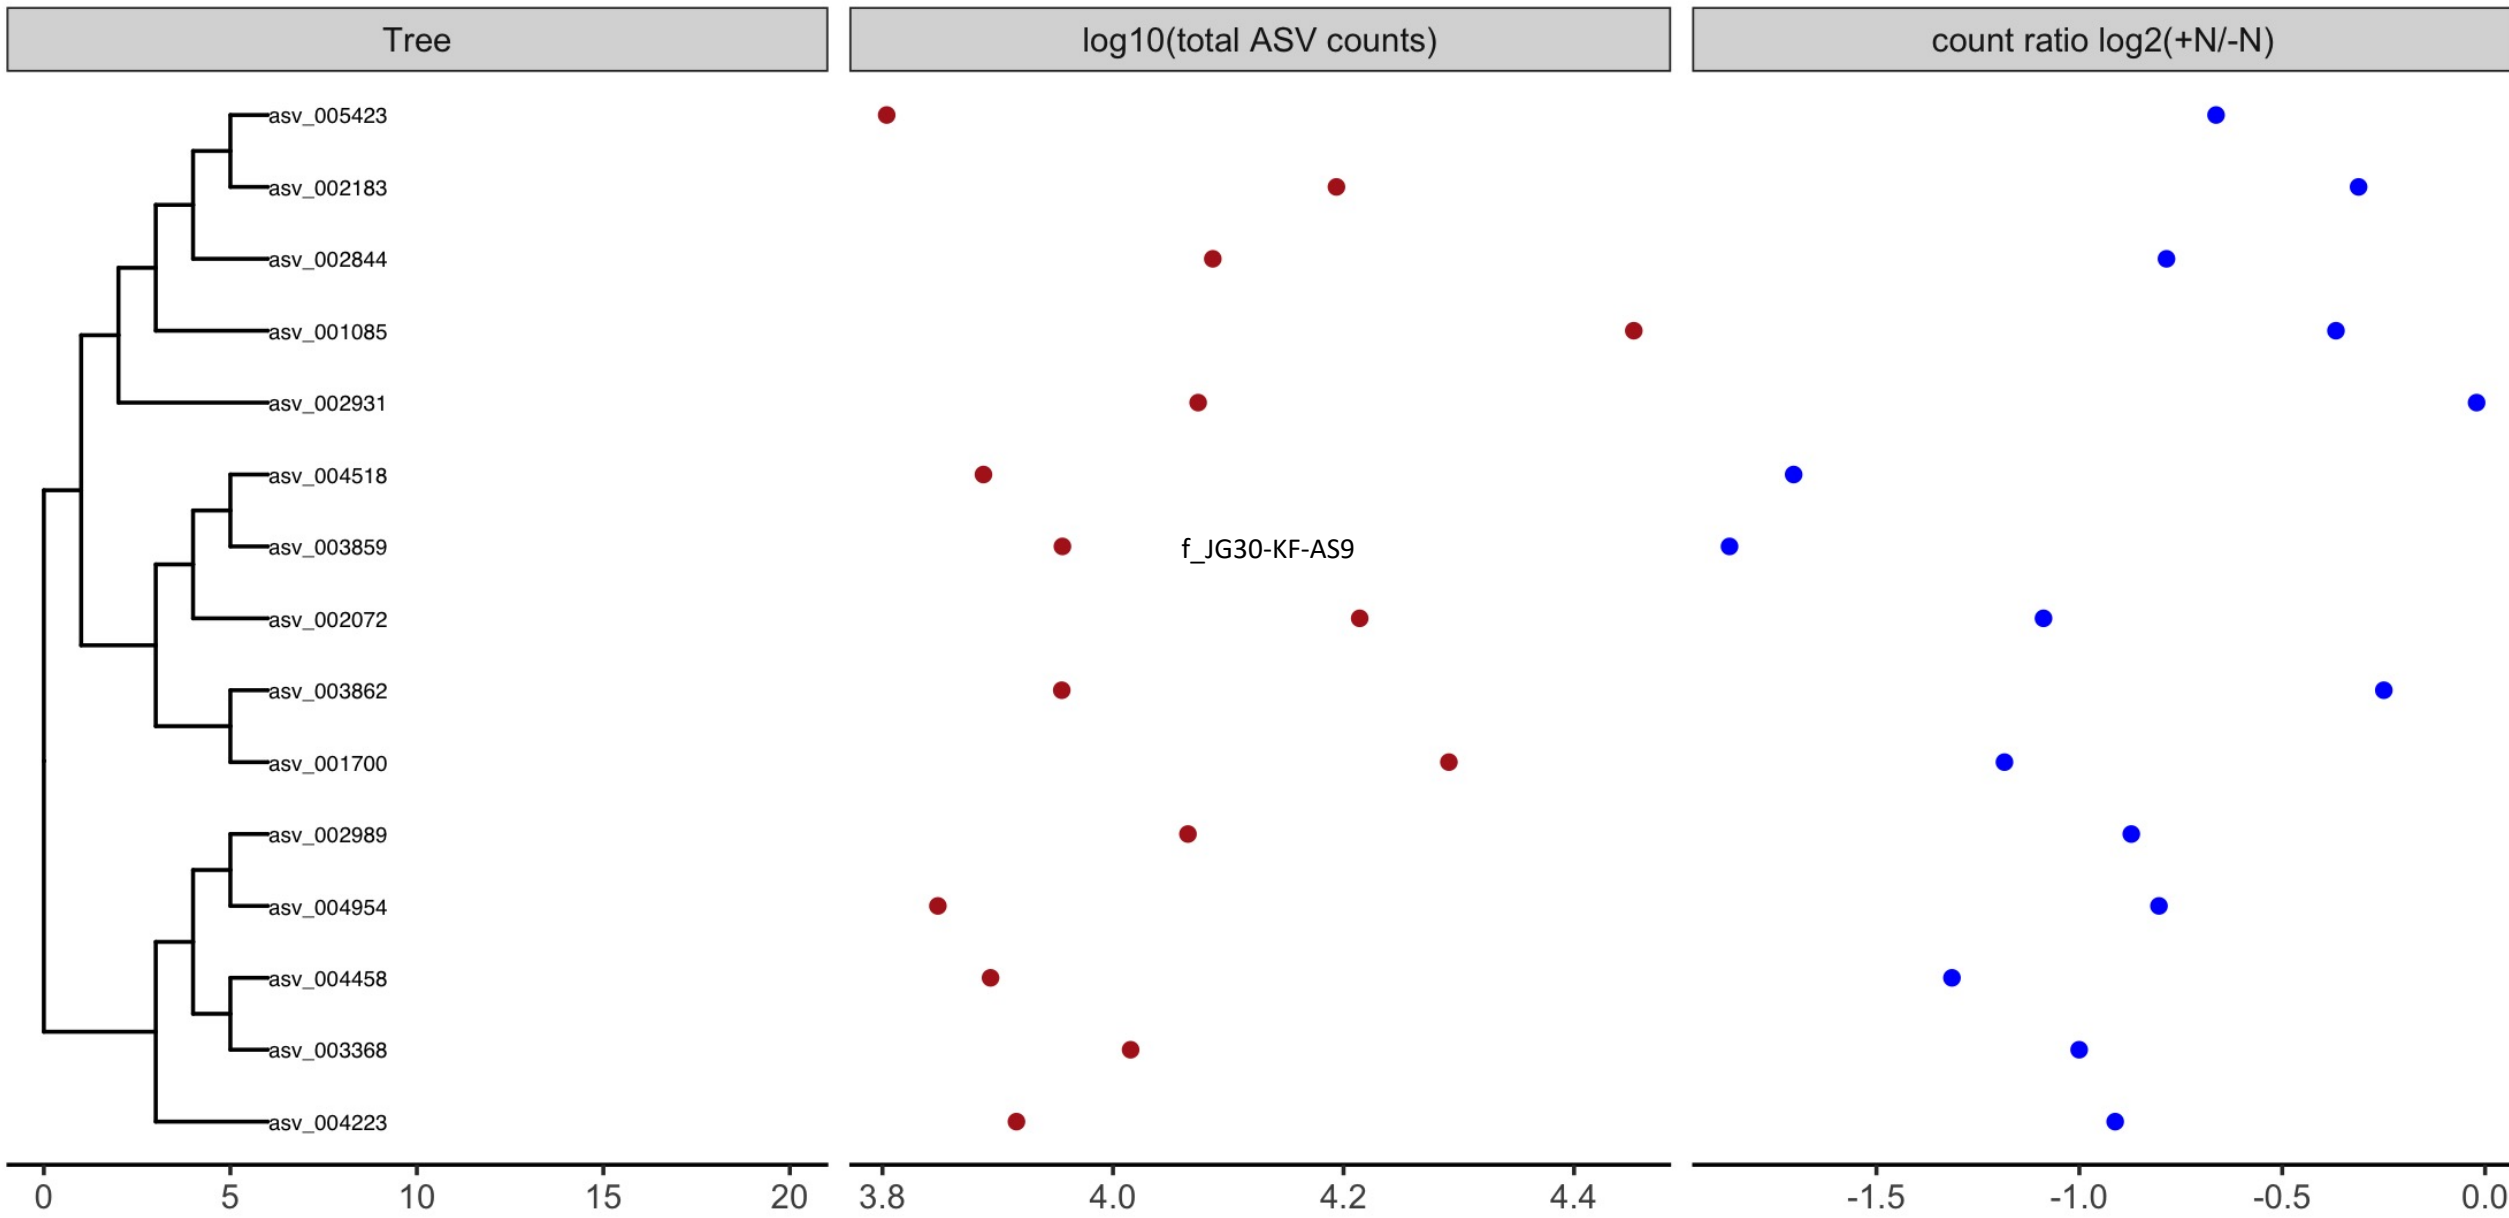

WD2101 soil group

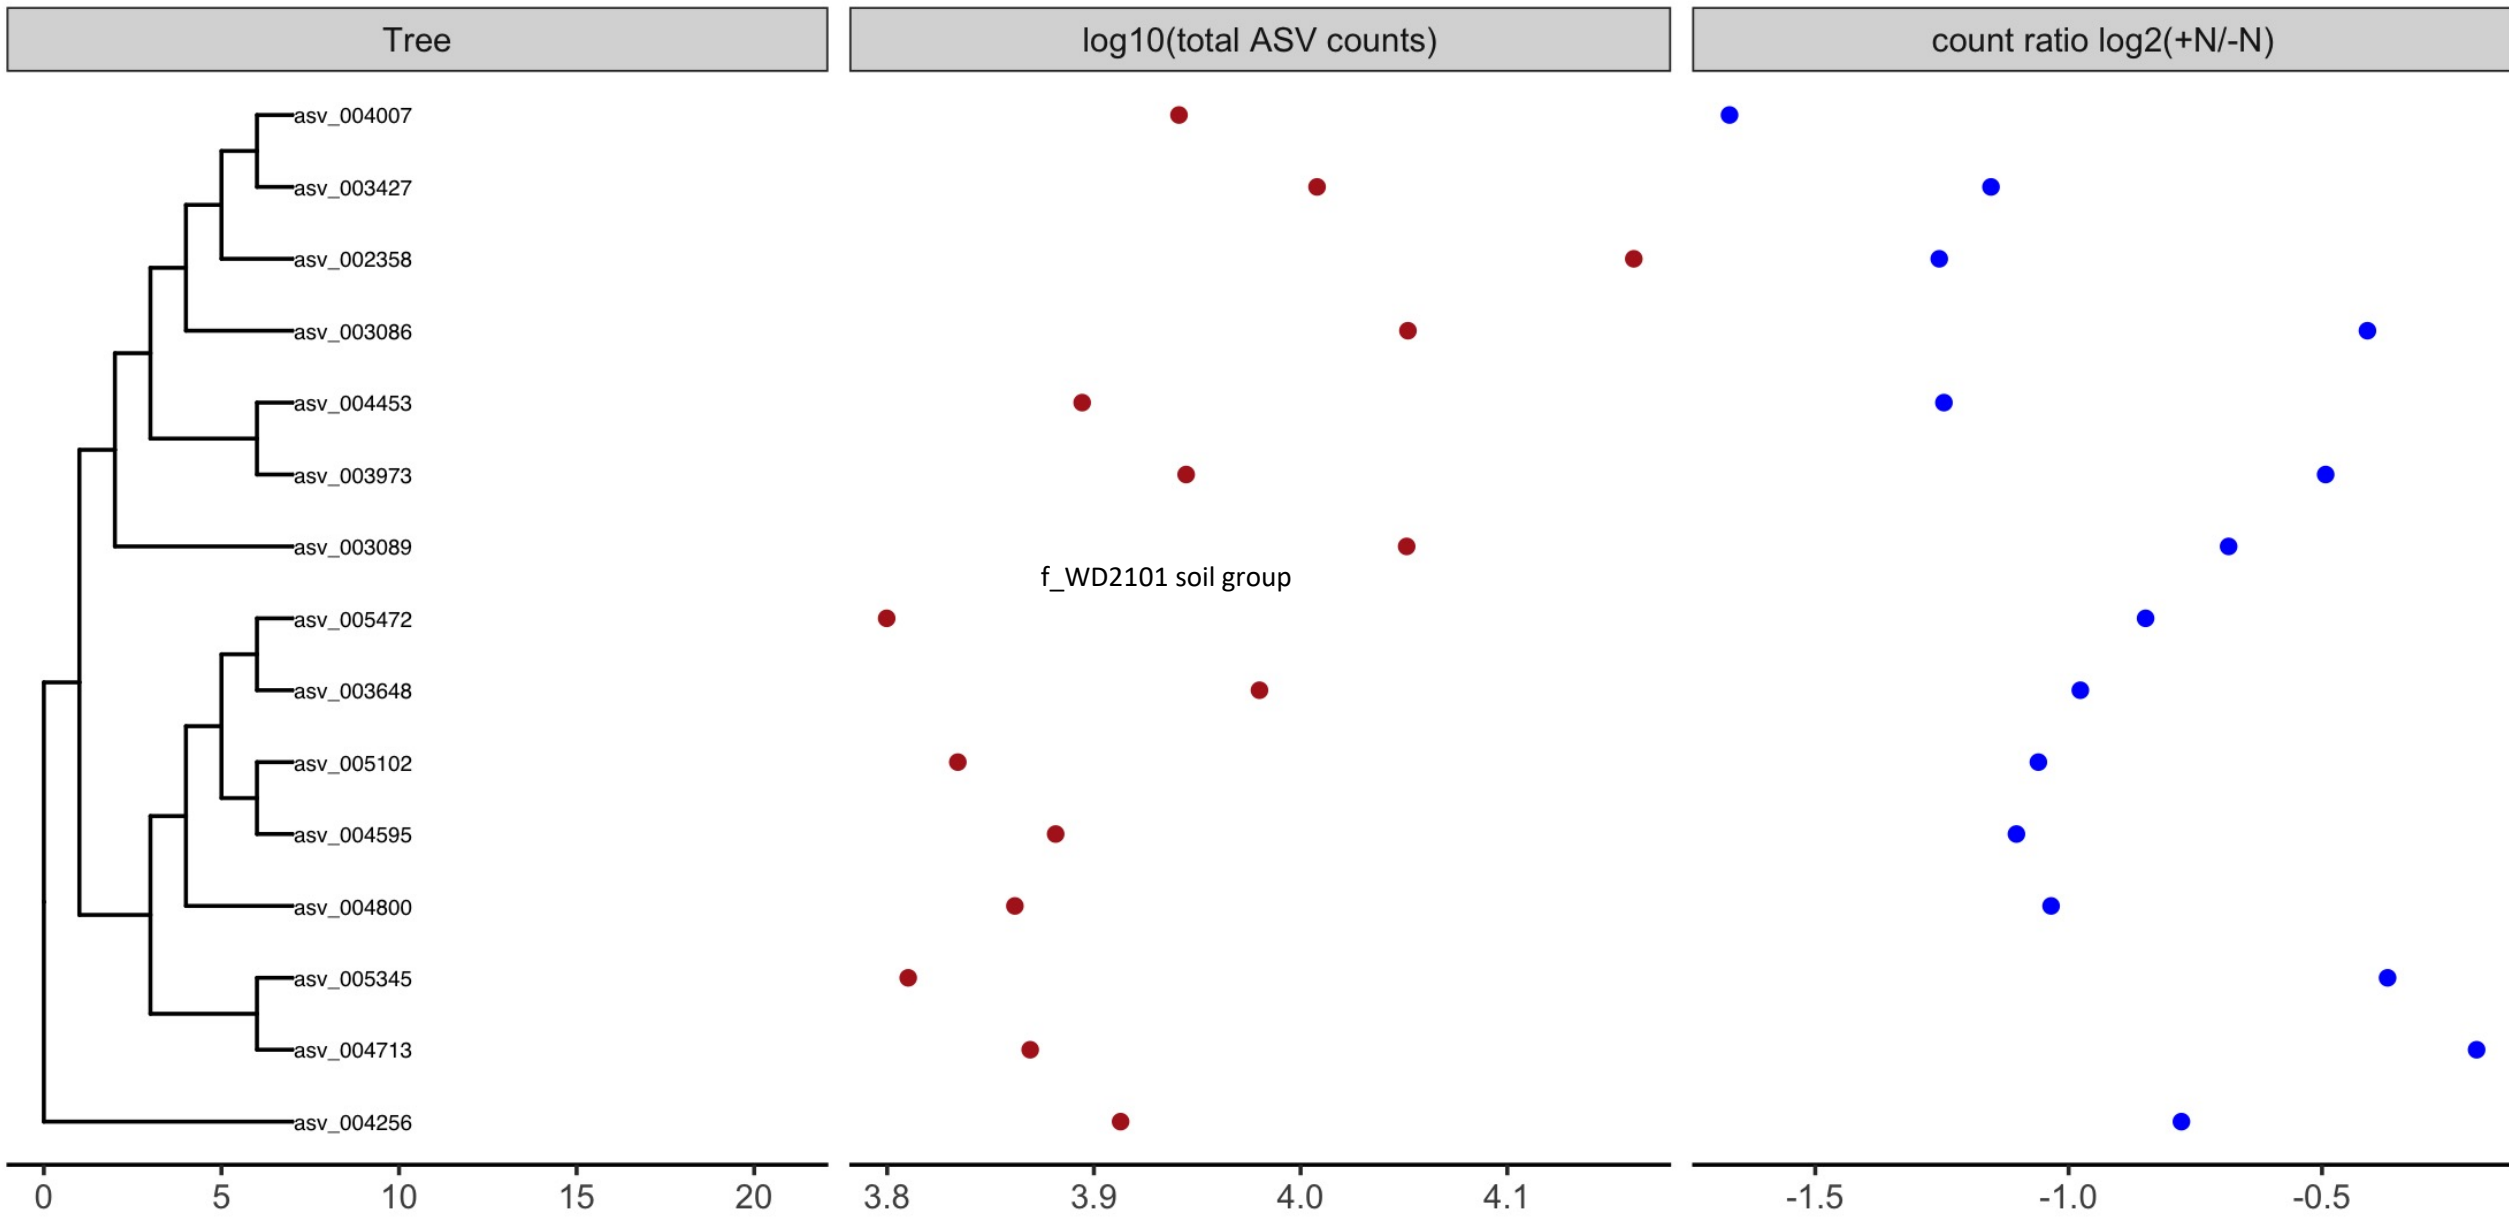

# Azospirillaceae

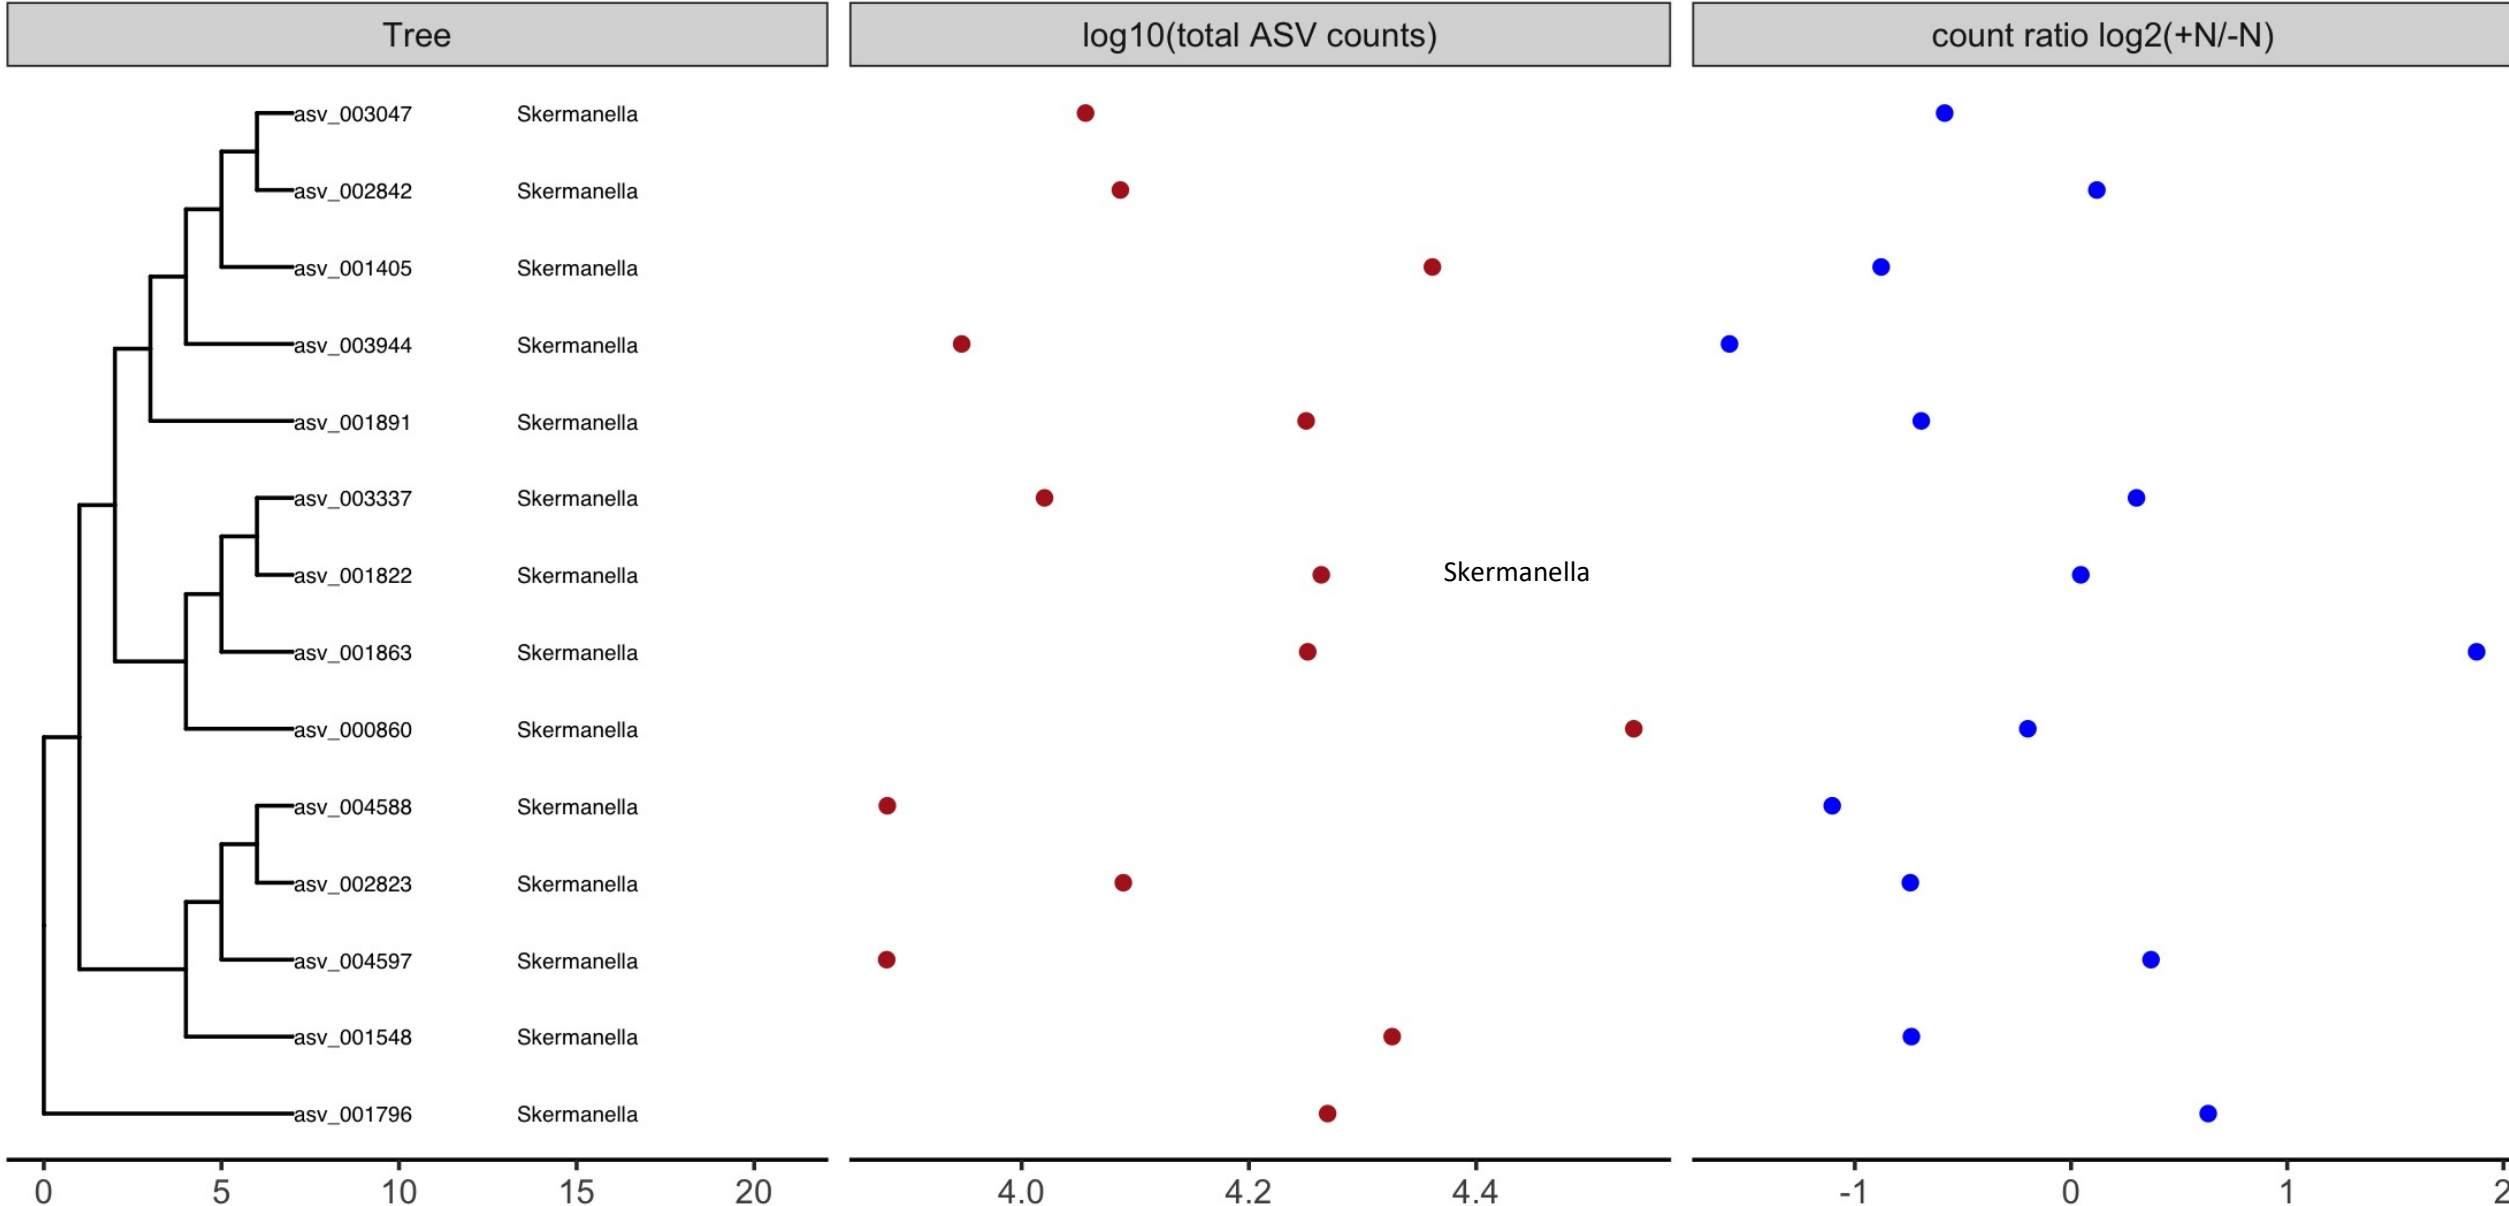

# Nitrospiraceae

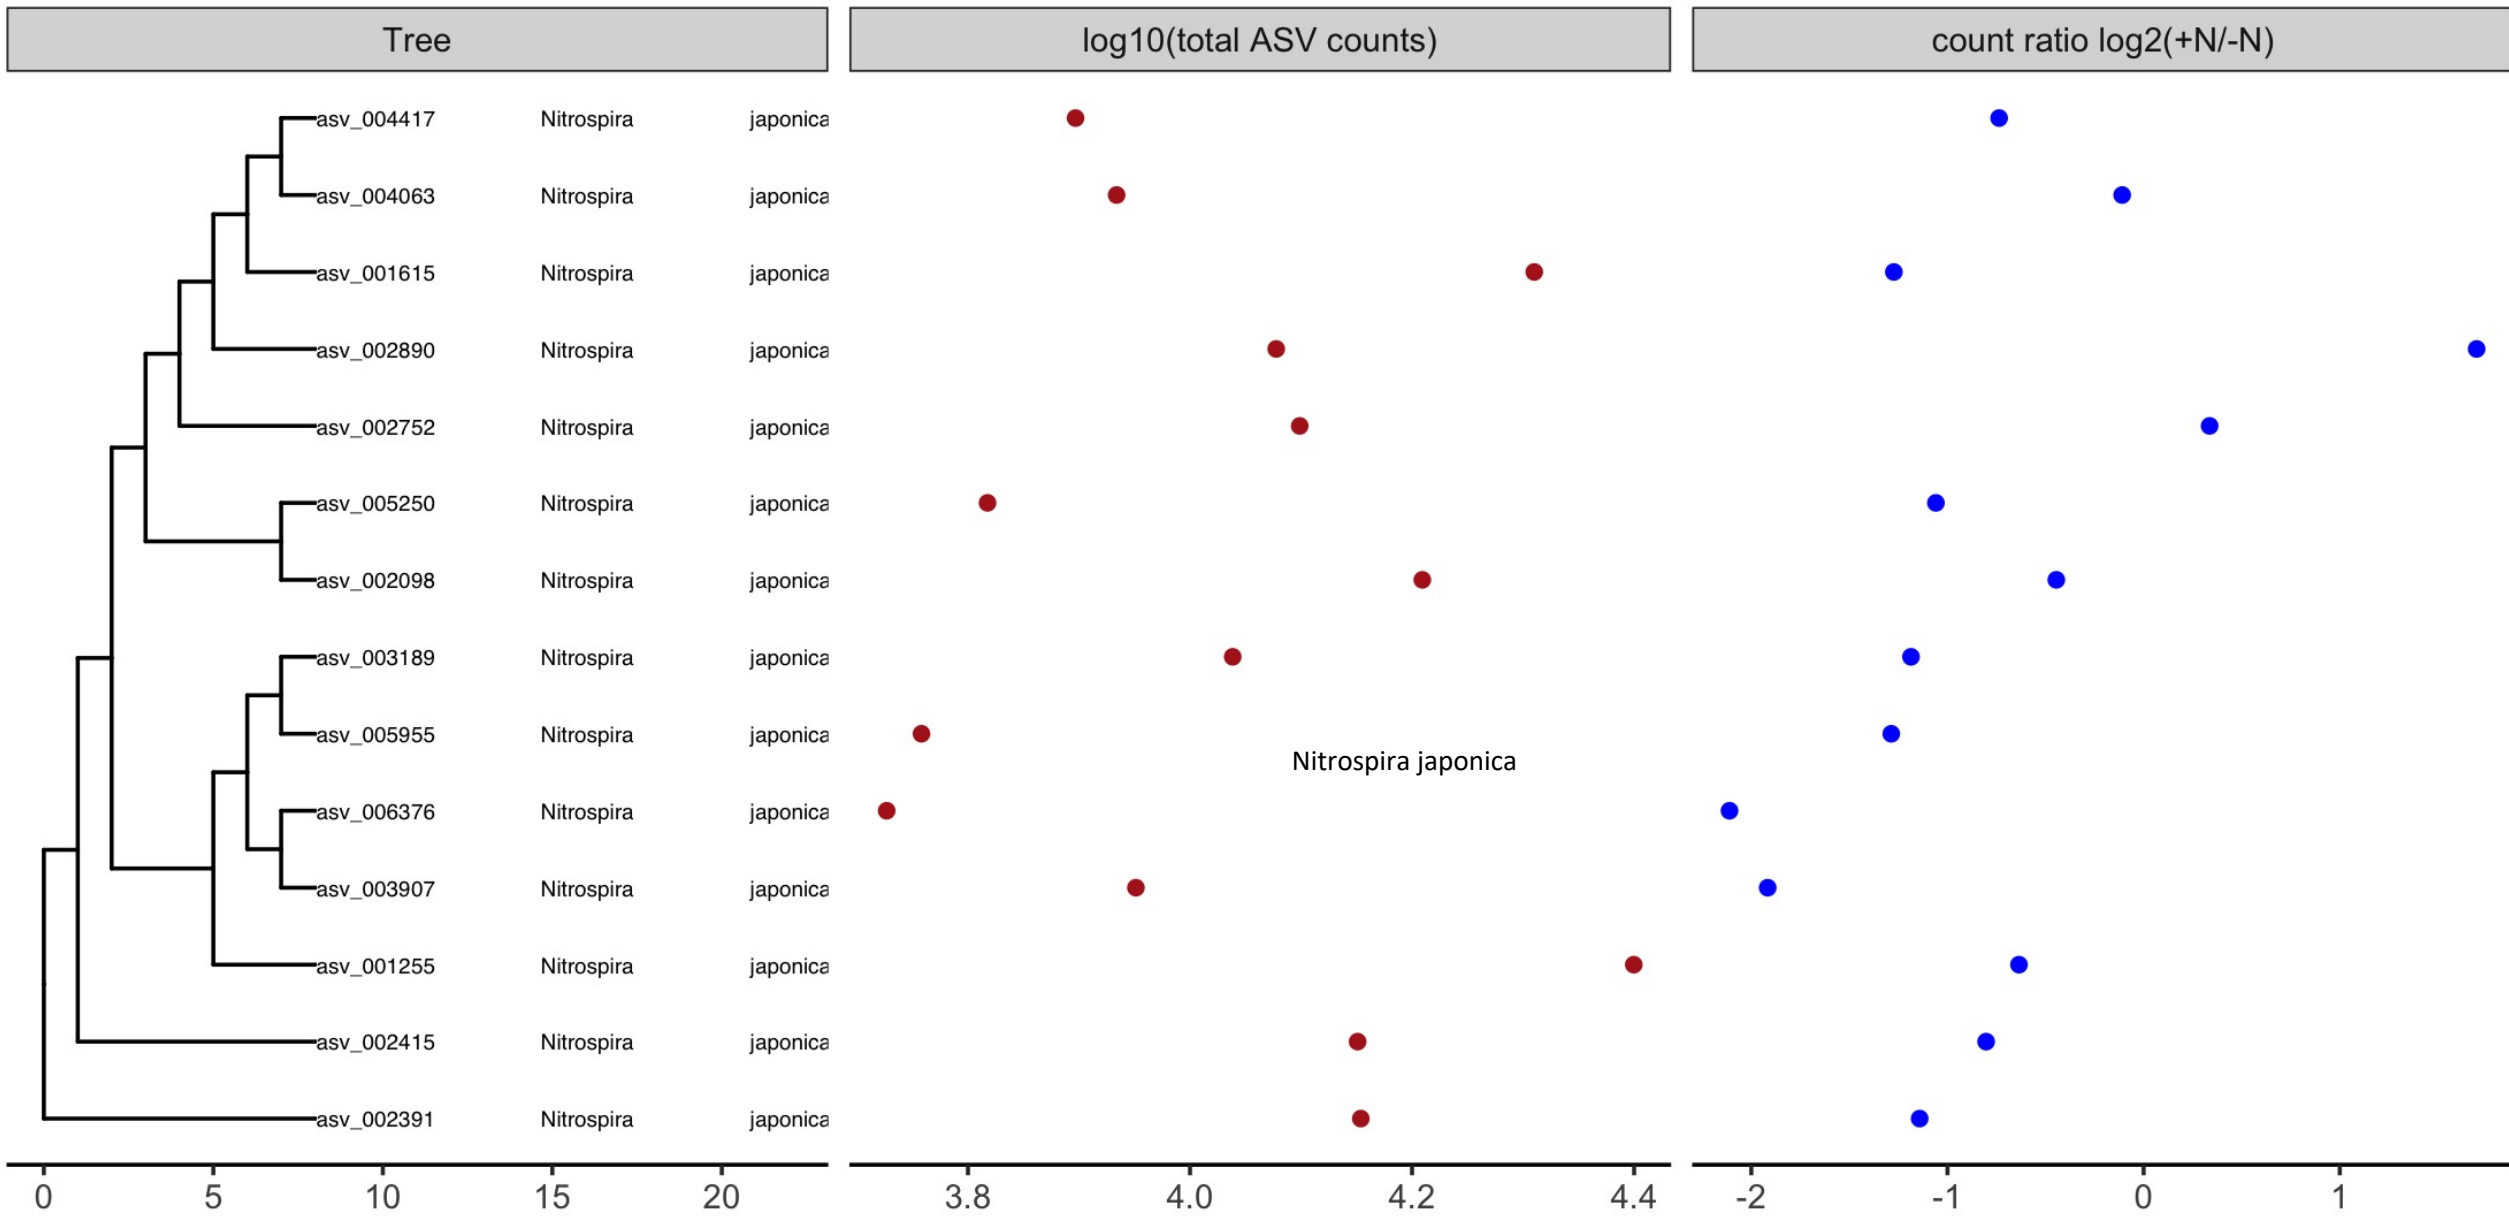

# Flavobacteriaceae

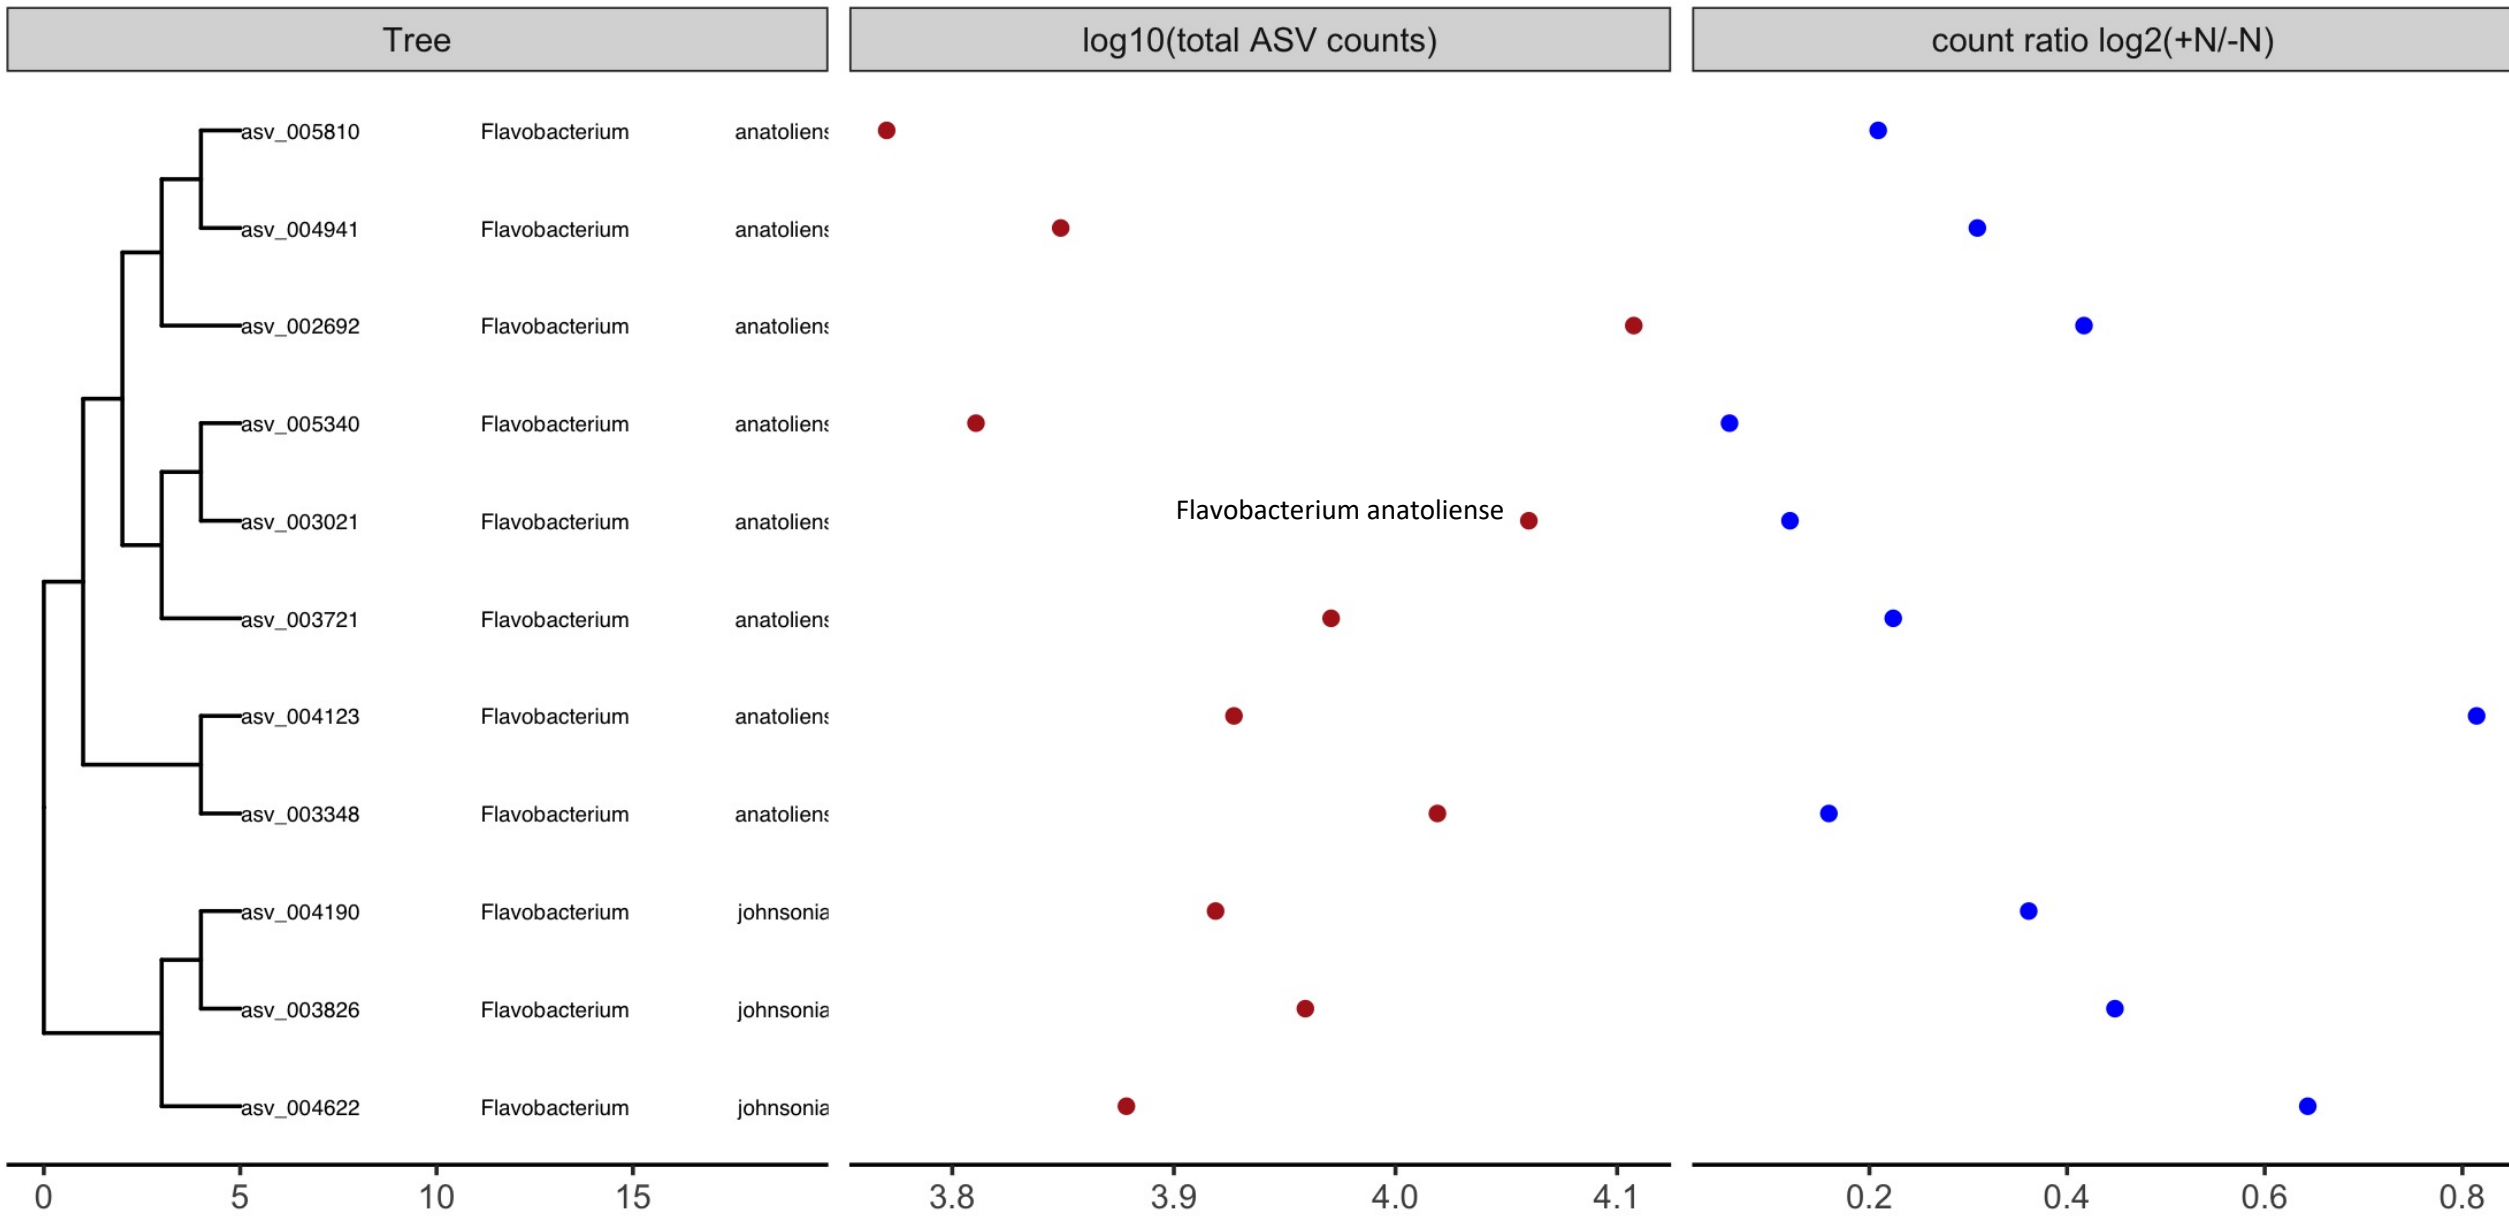



Polyangiaceae

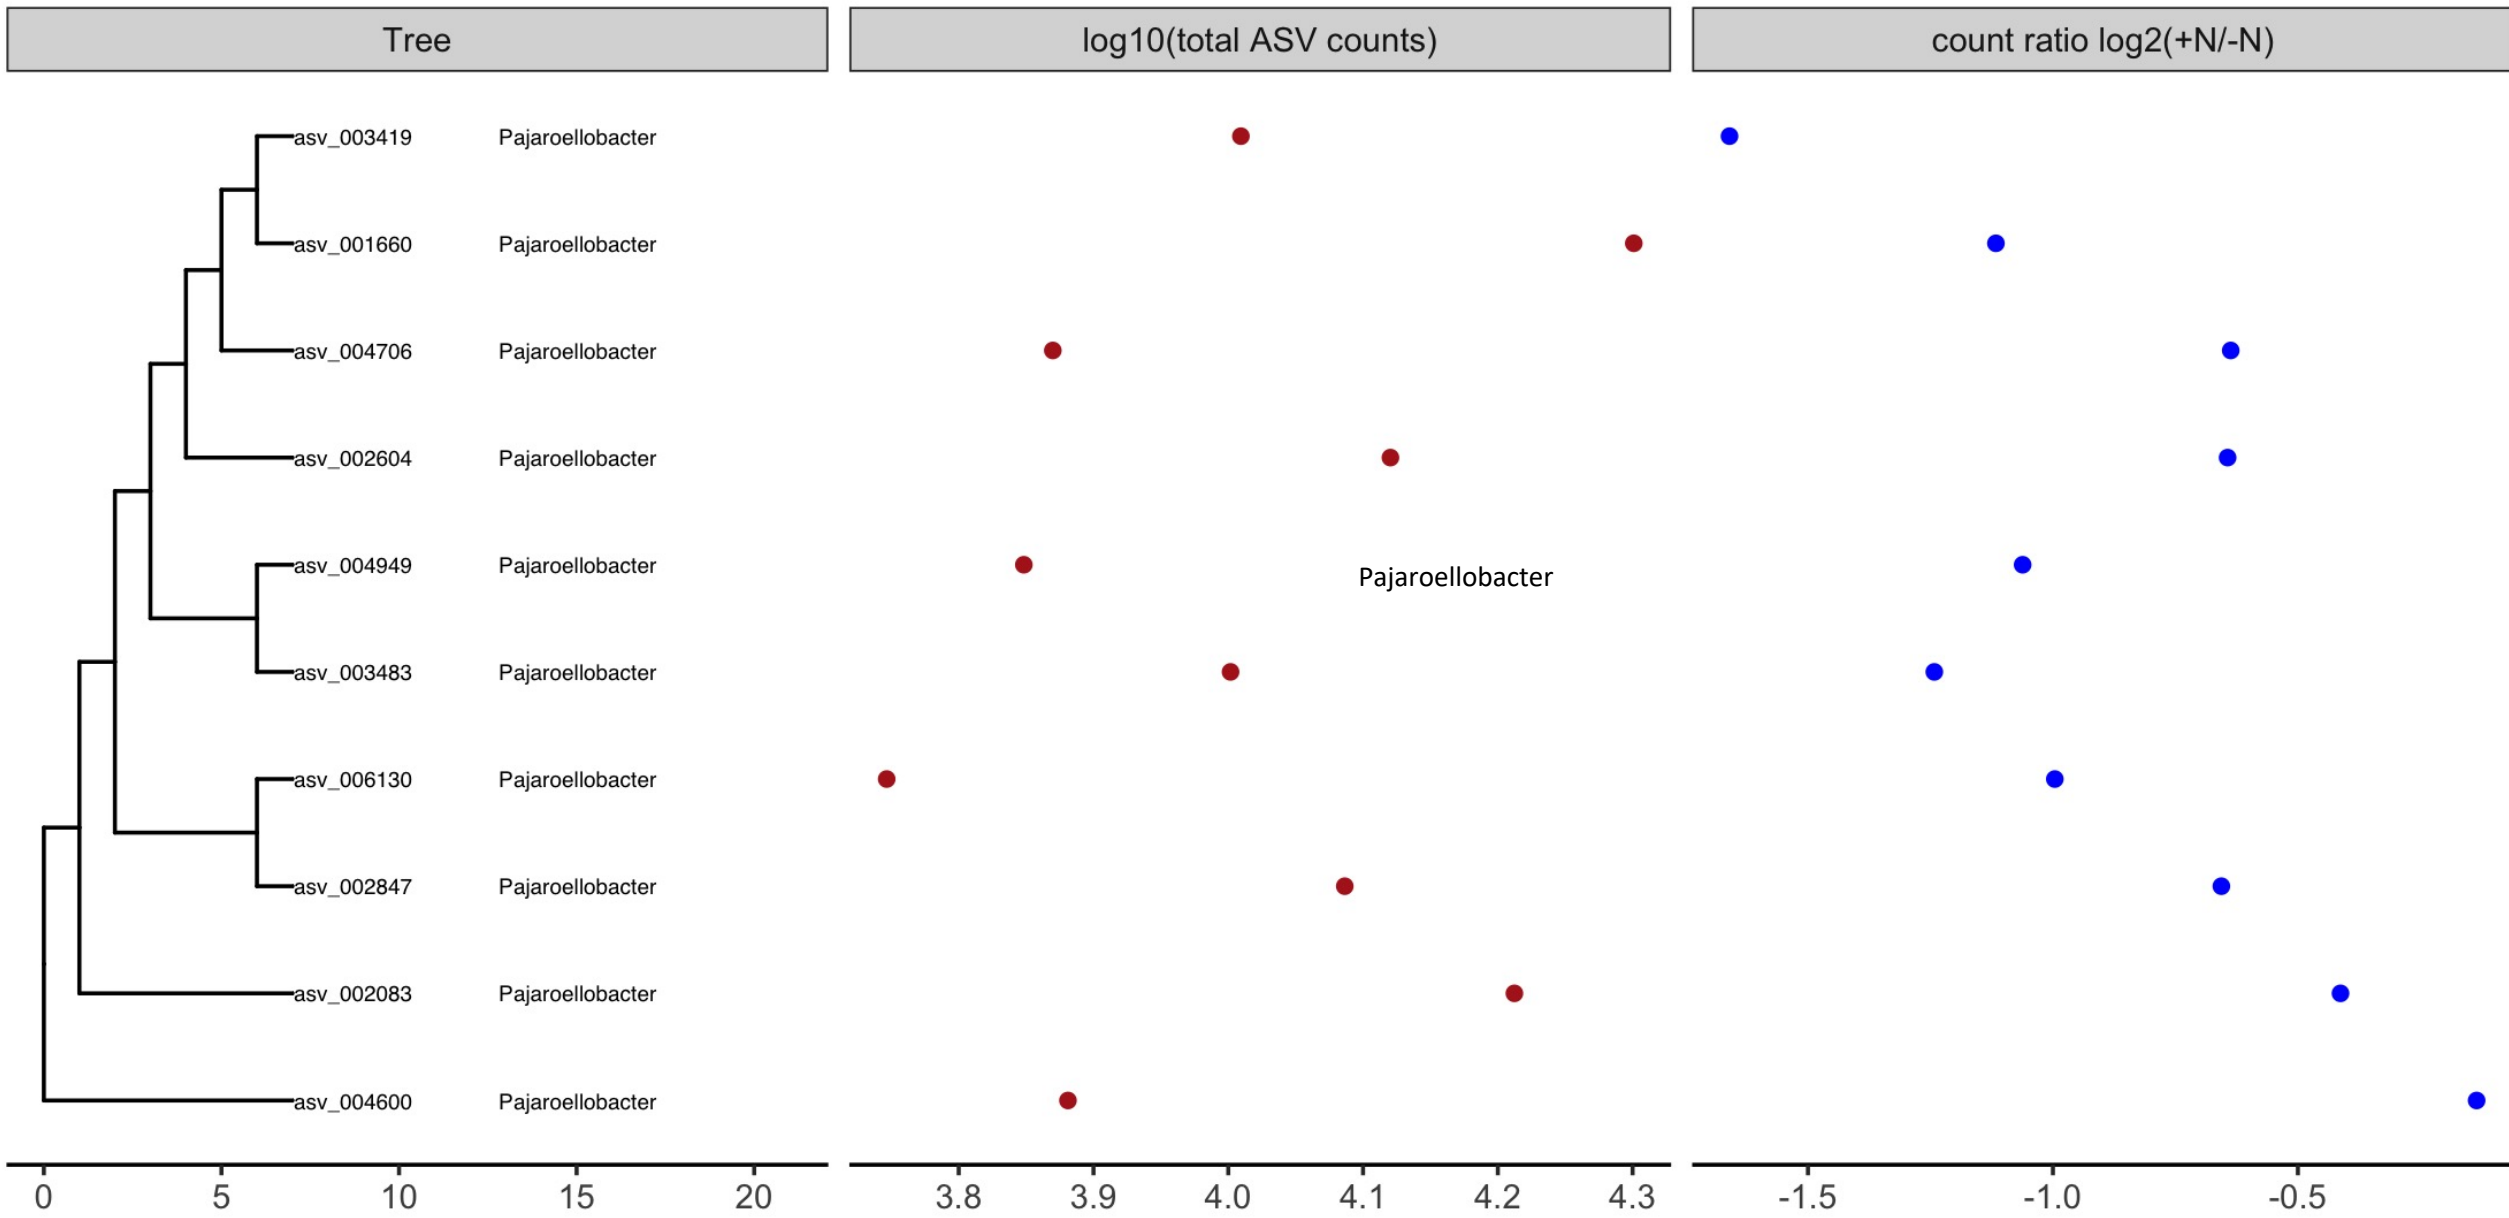

# Cellulomonadaceae

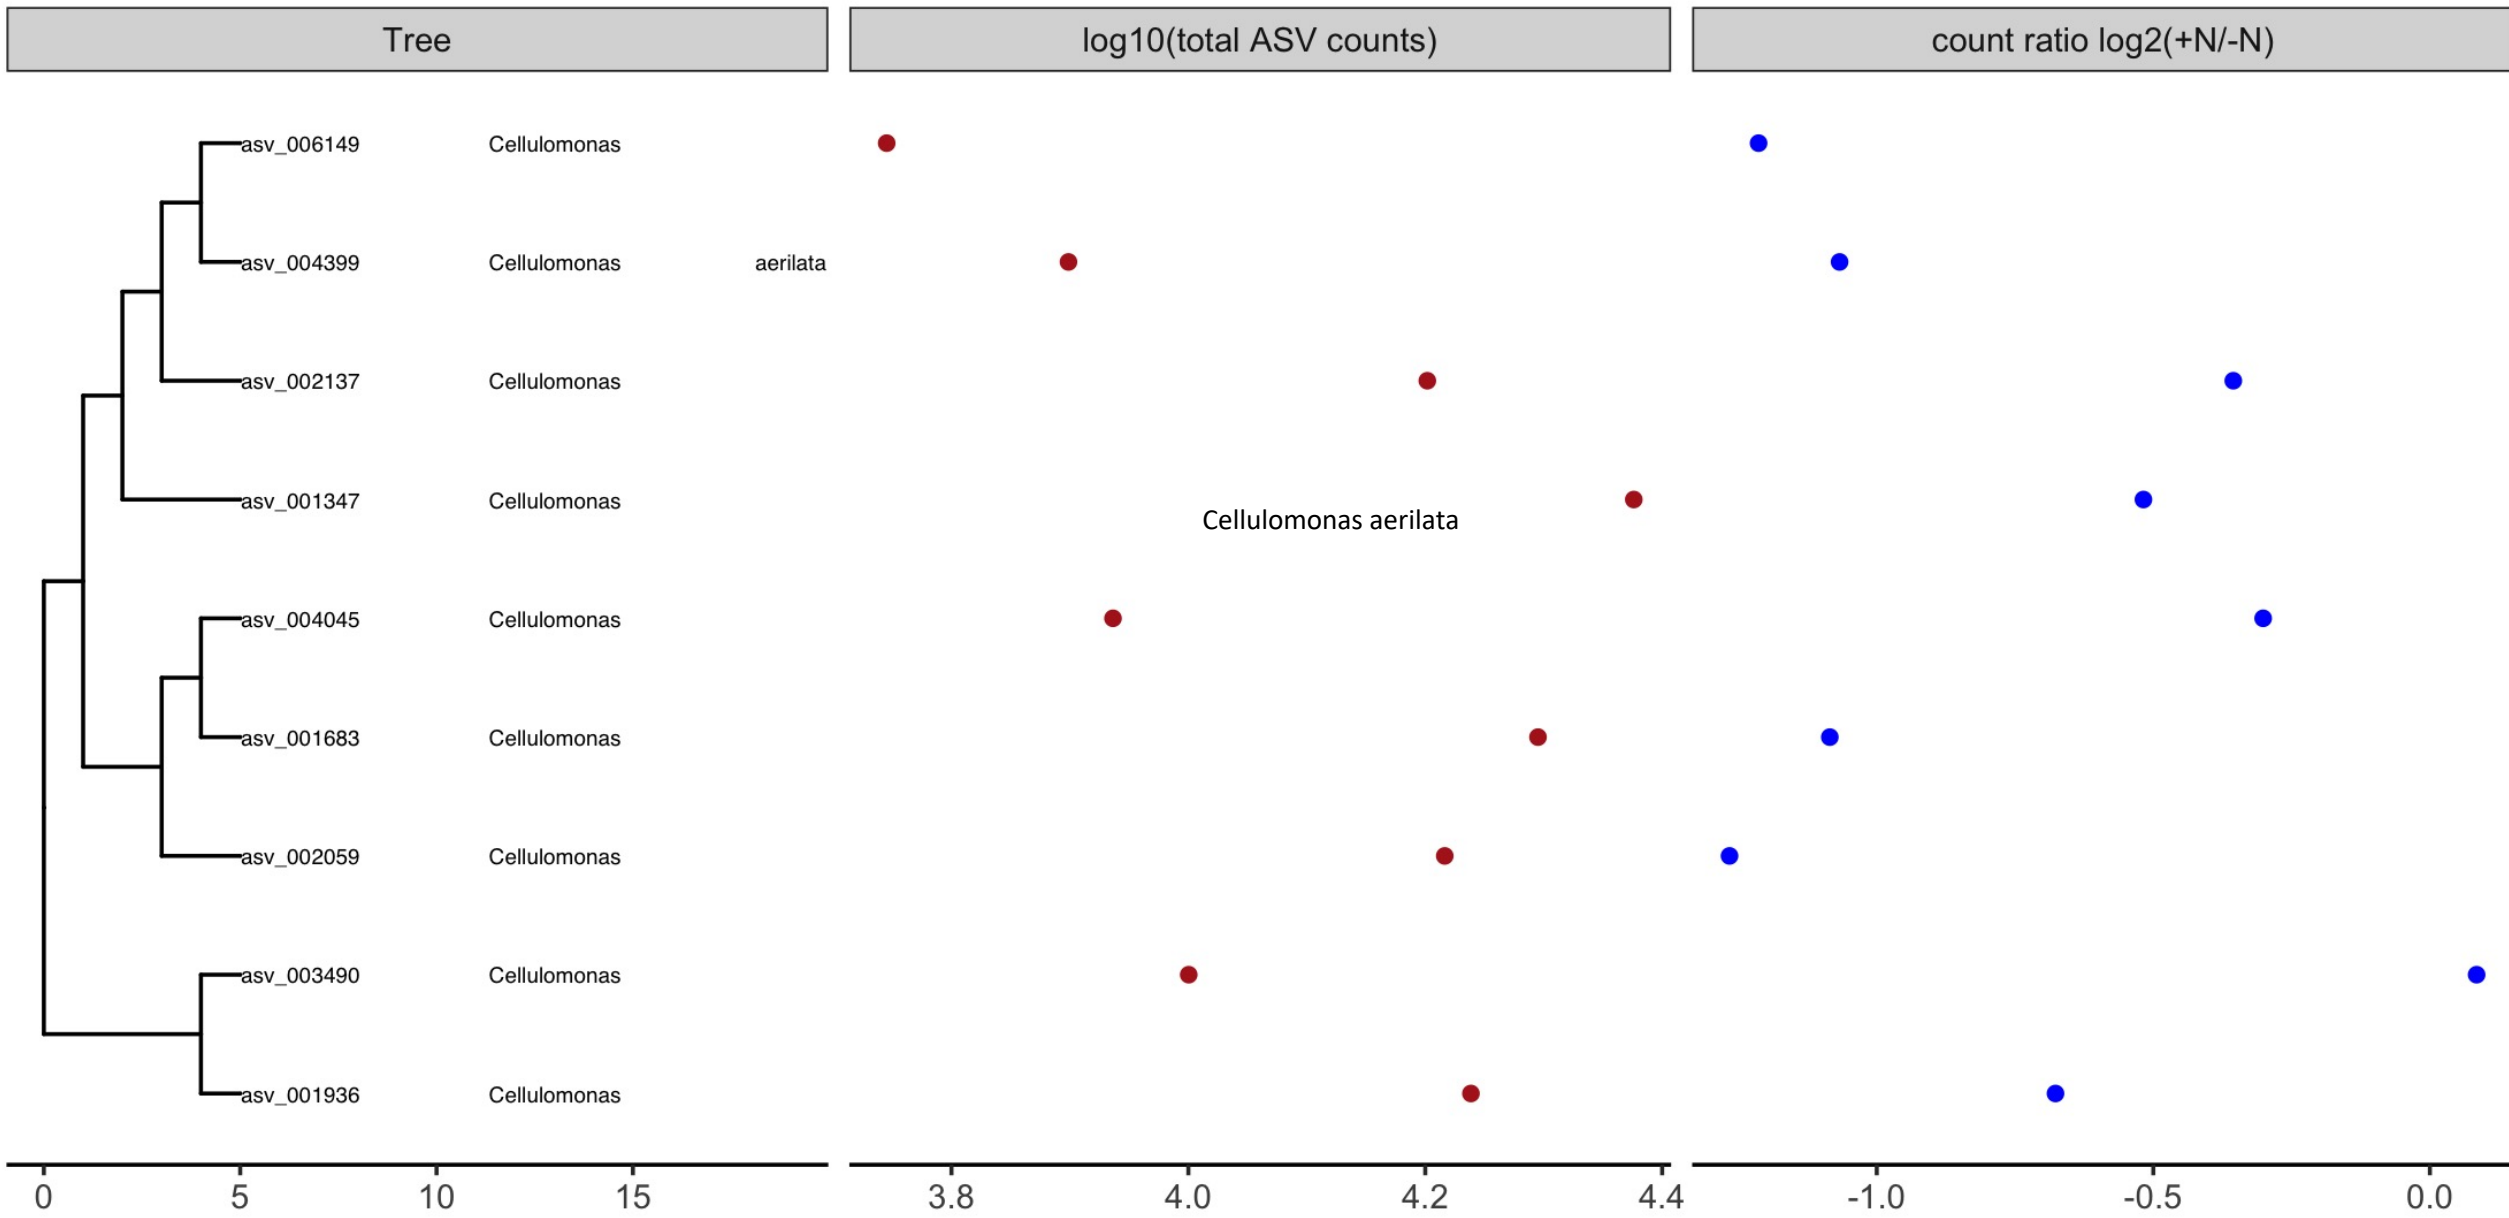

# Ilumatobacteraceae

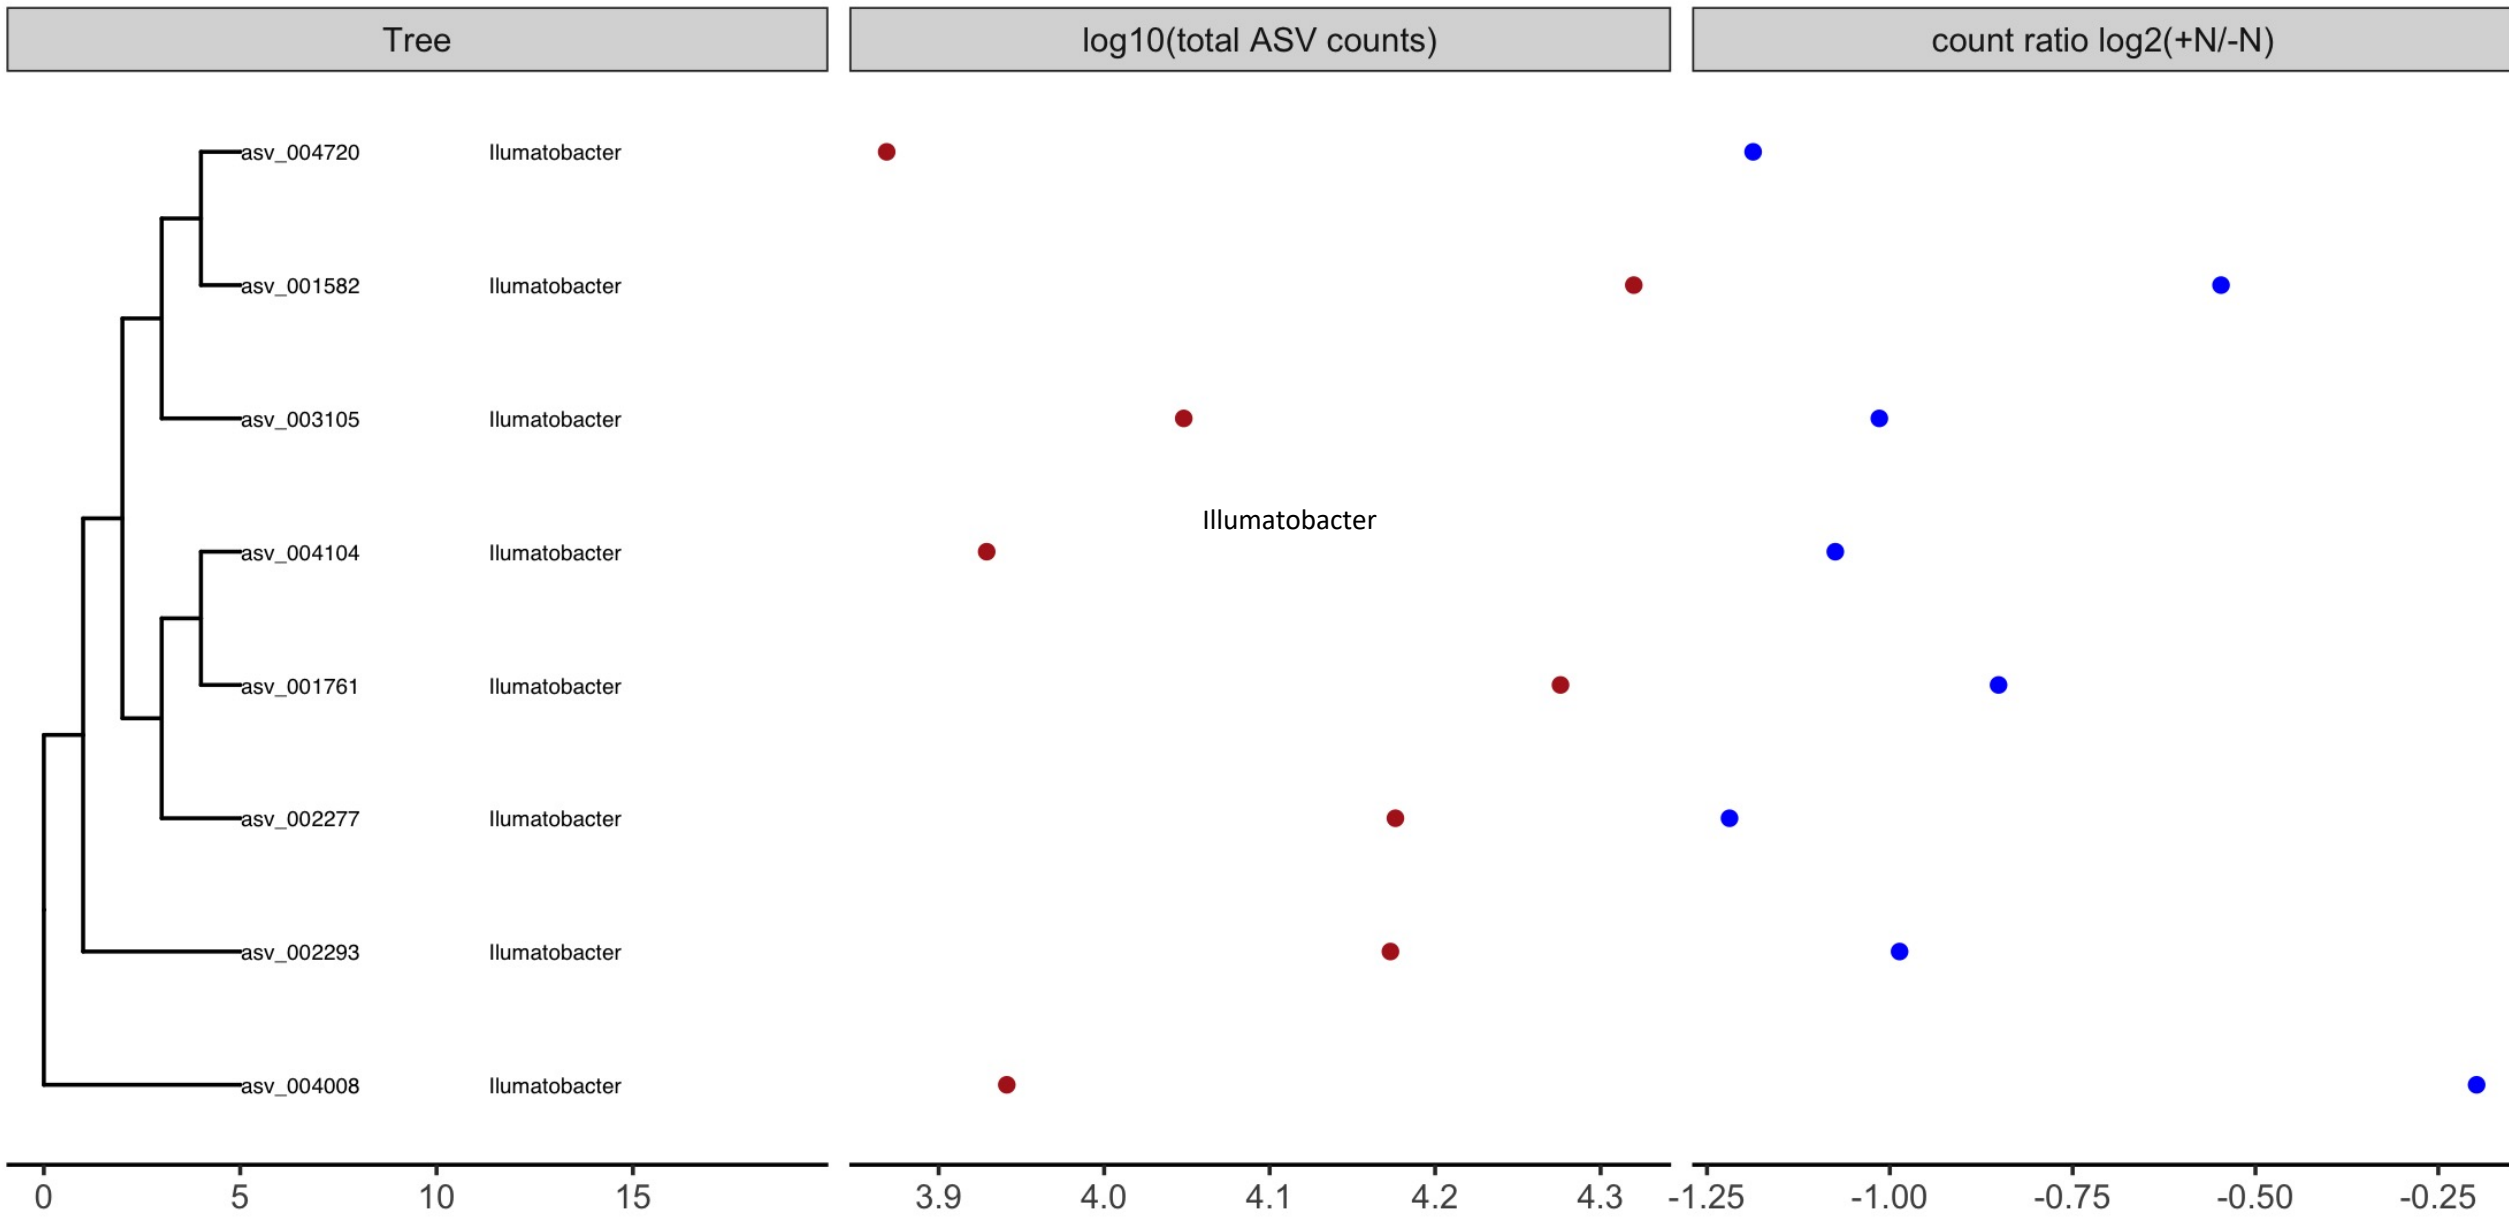

# Kineosporiaceae

Tree

log10(total ASV counts)

count ratio log2(+N/-N)

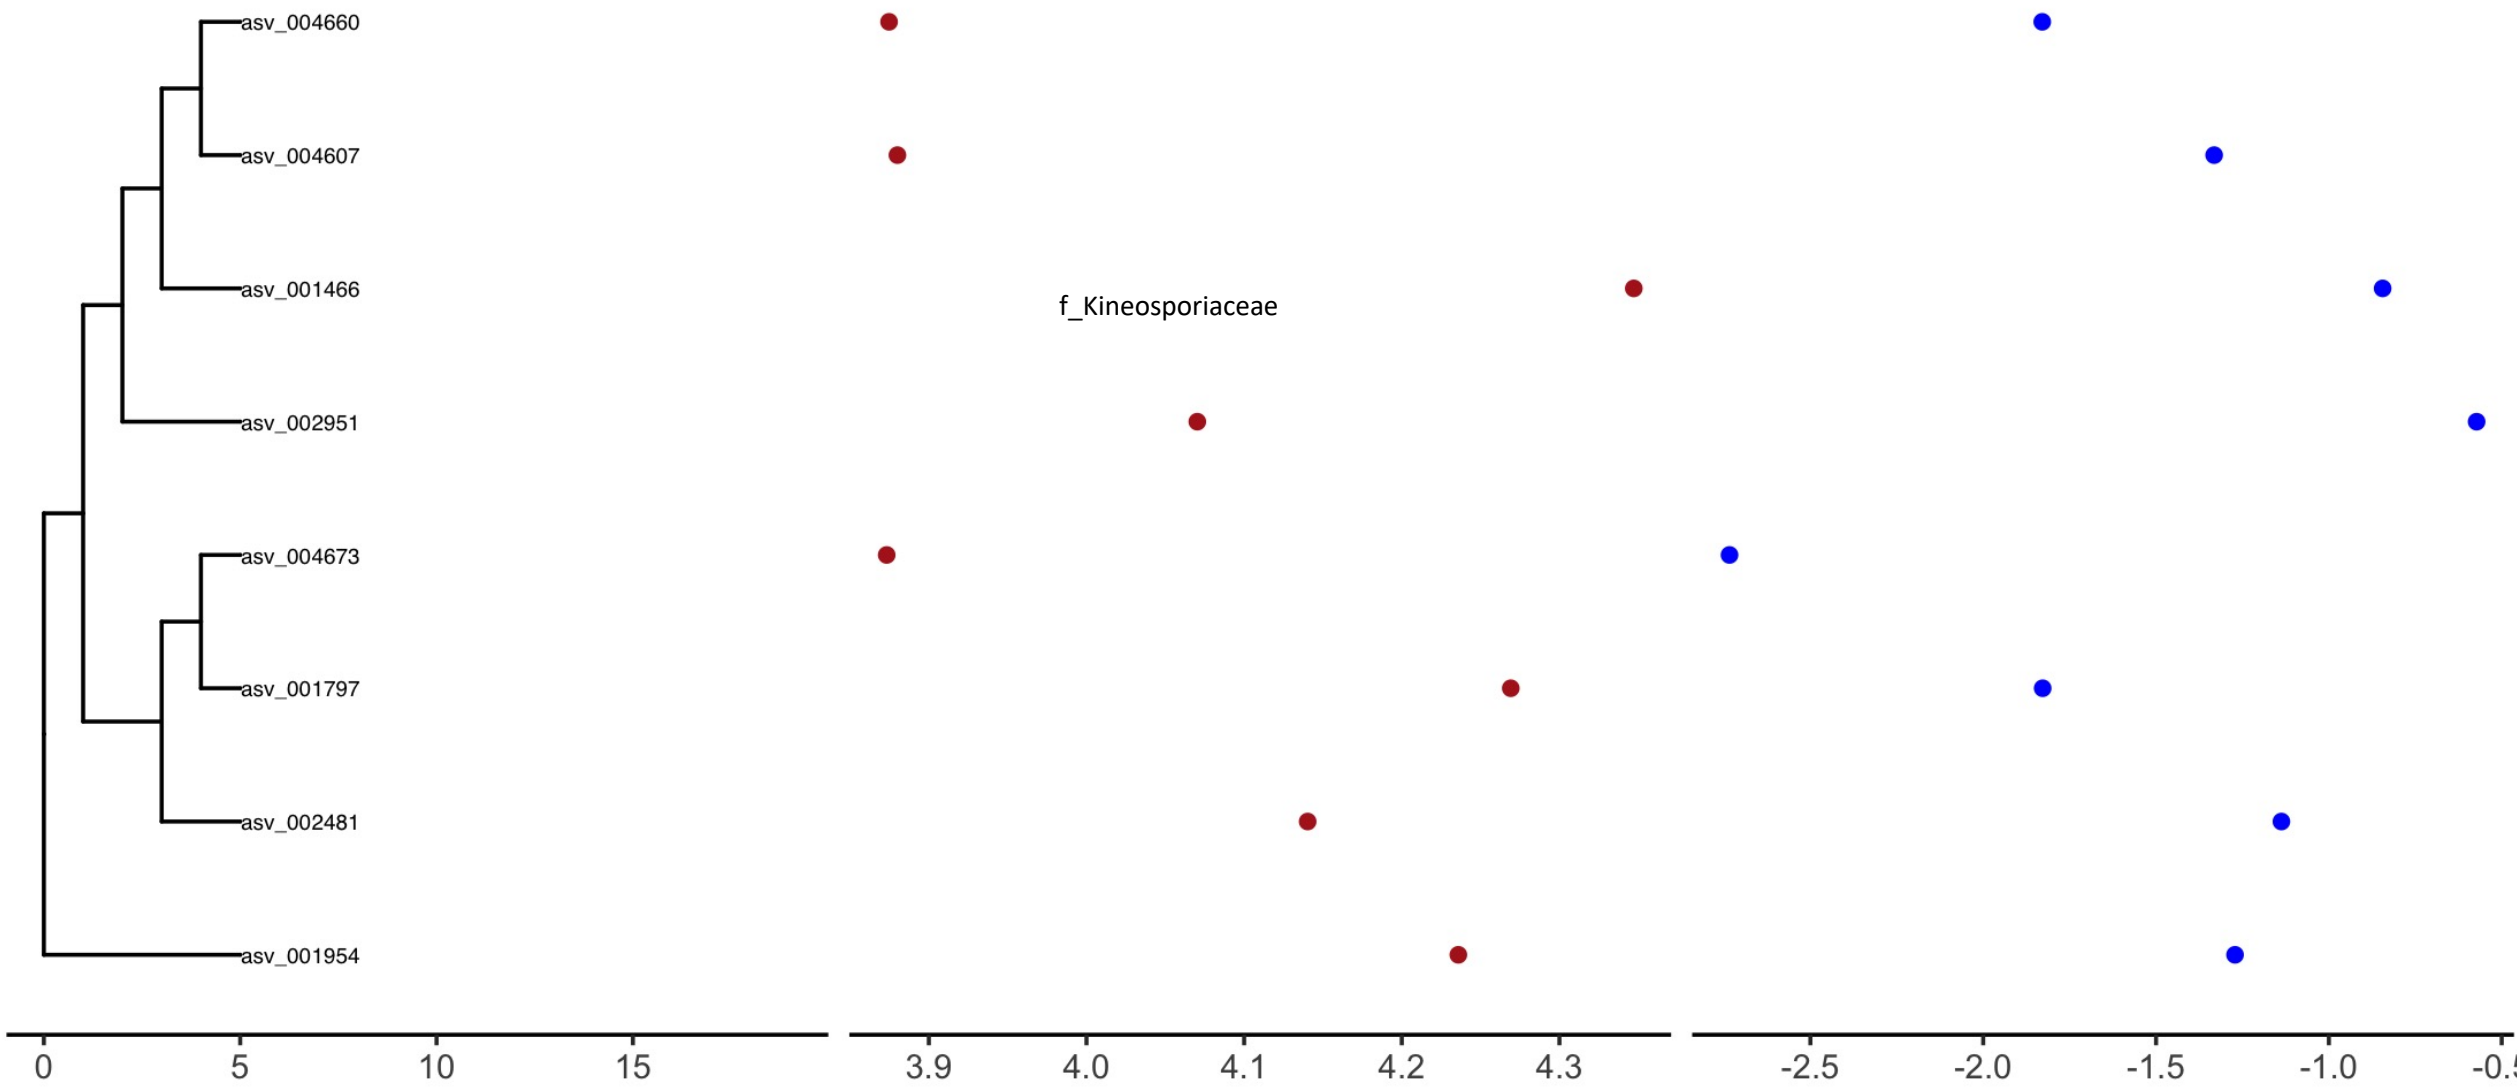

Beijerinckiaceae

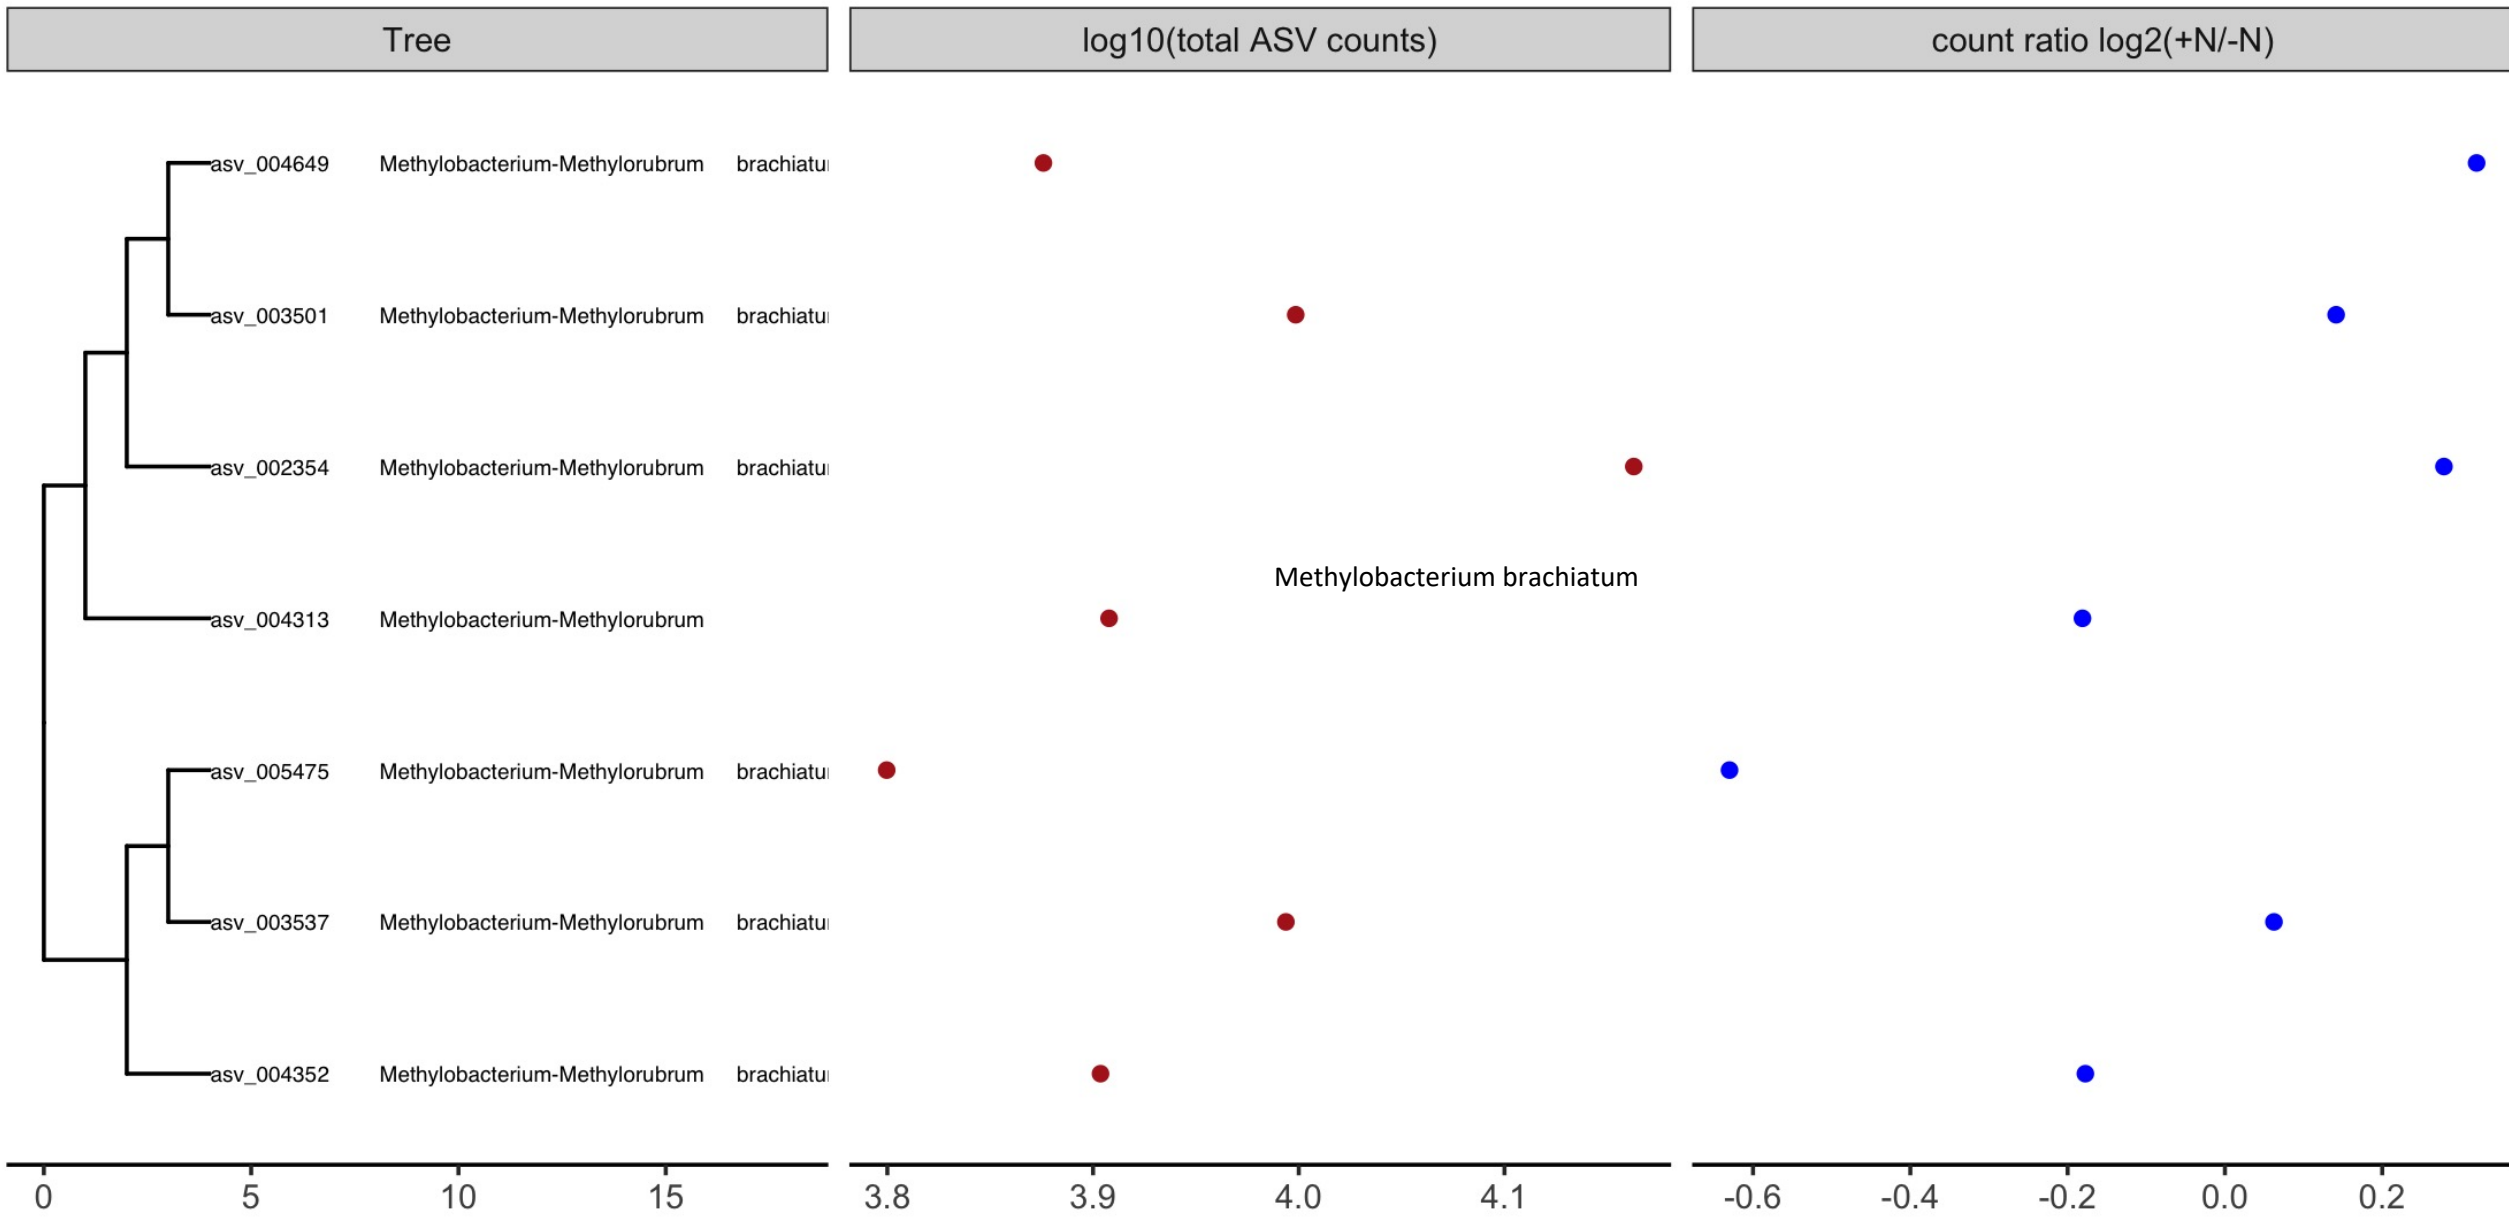

# Gaiellaceae

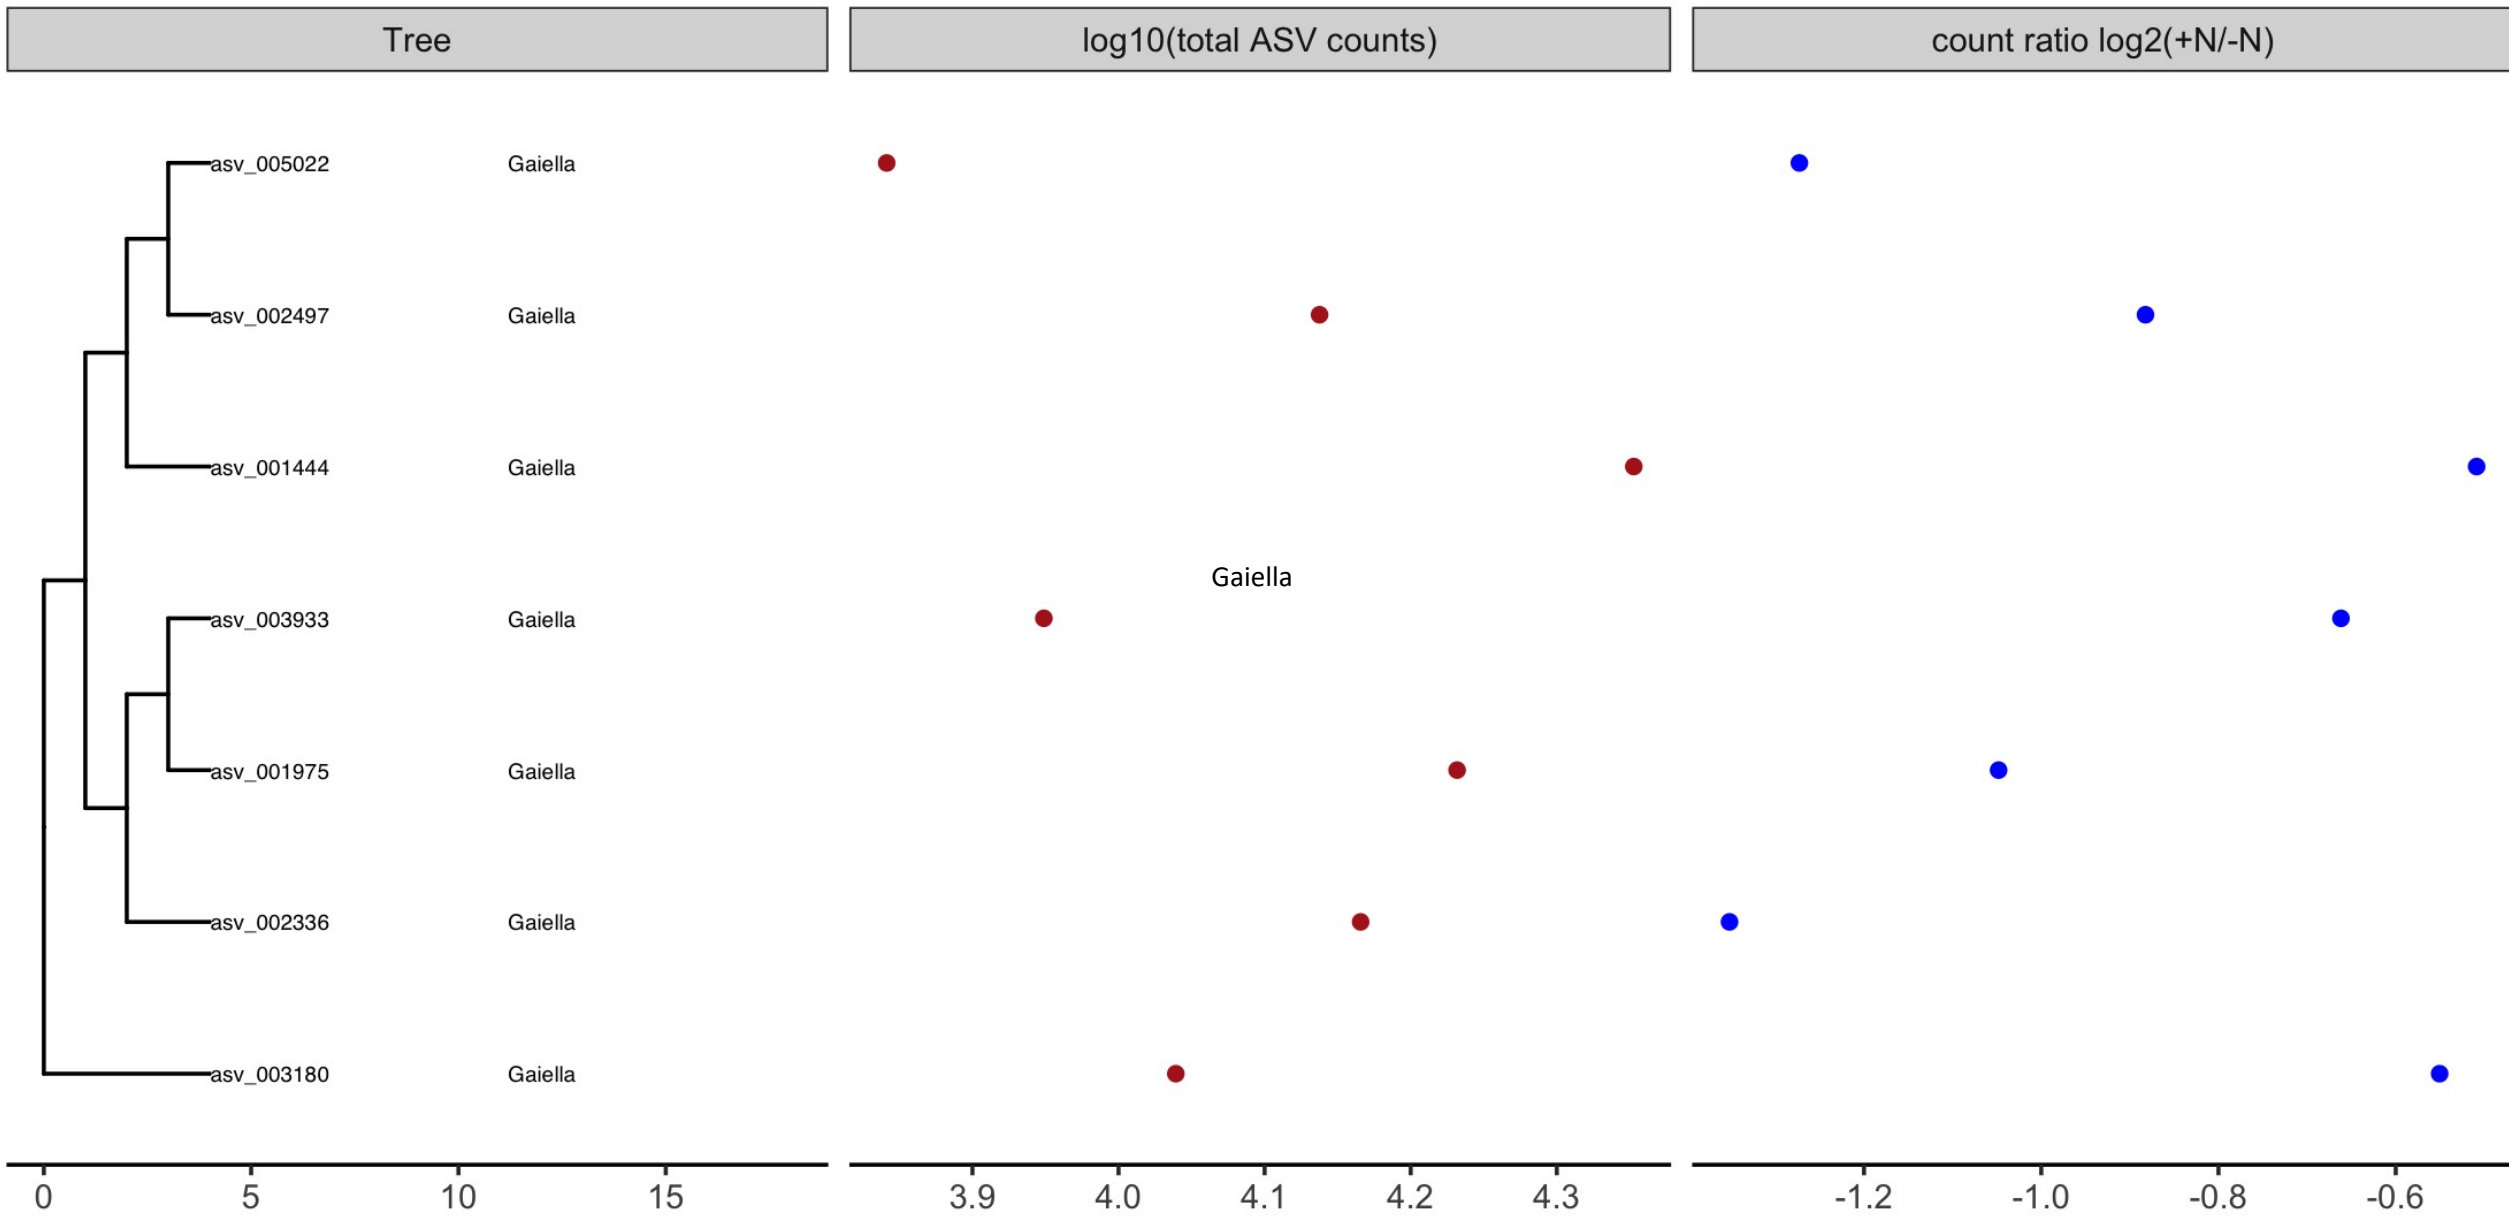

# Unknown Family

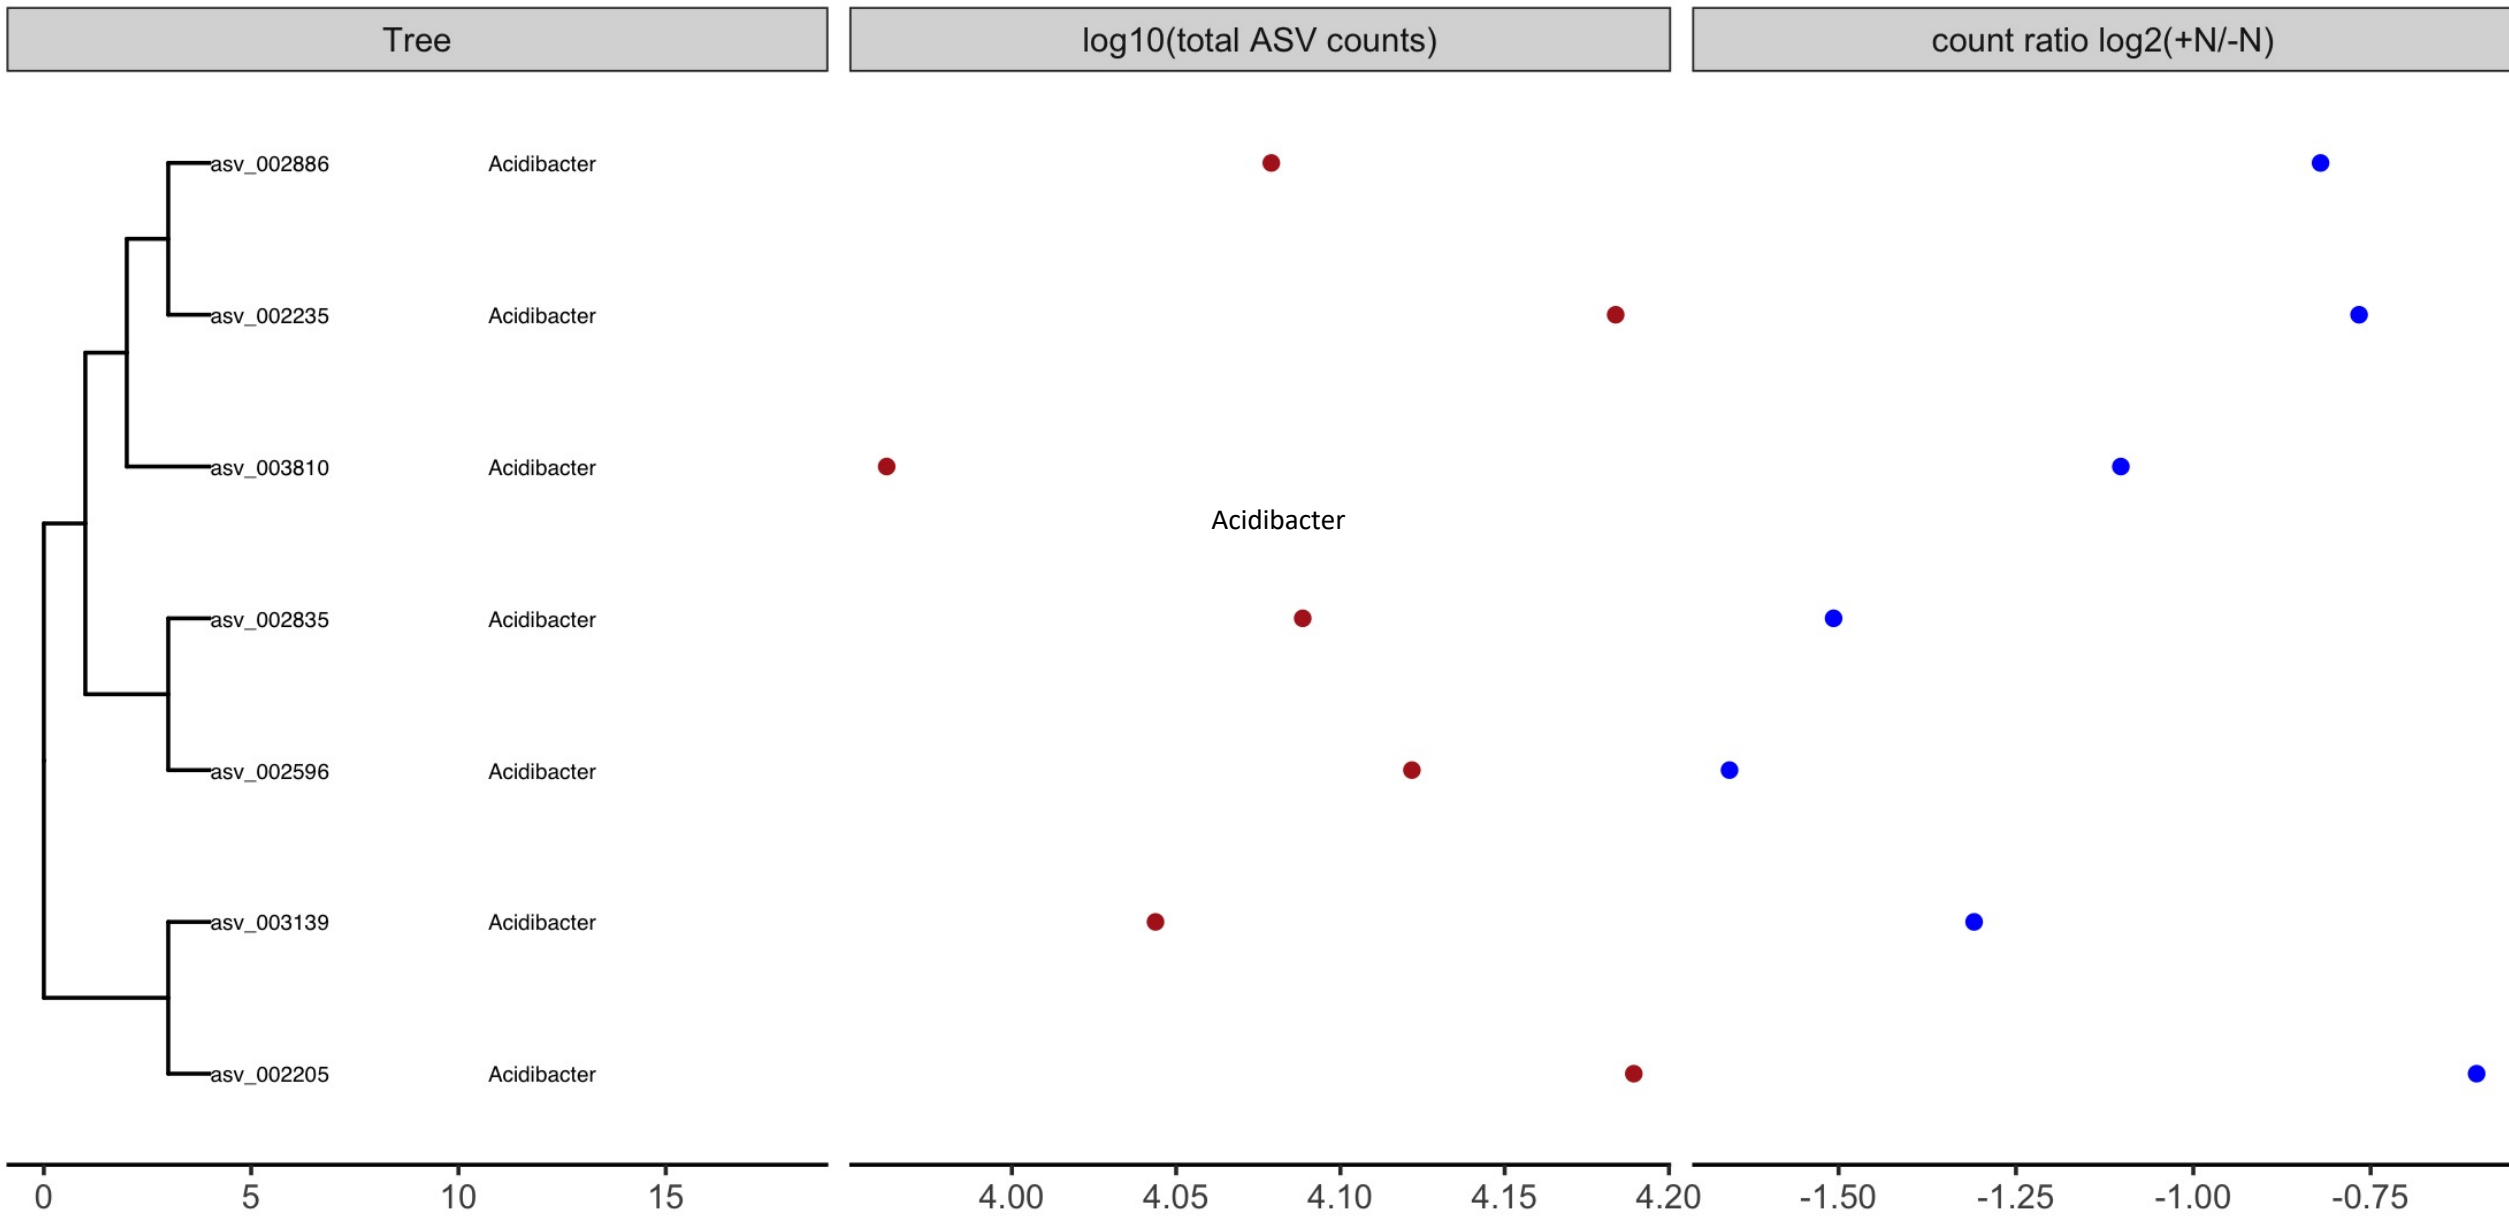



# Steroidobacteraceae

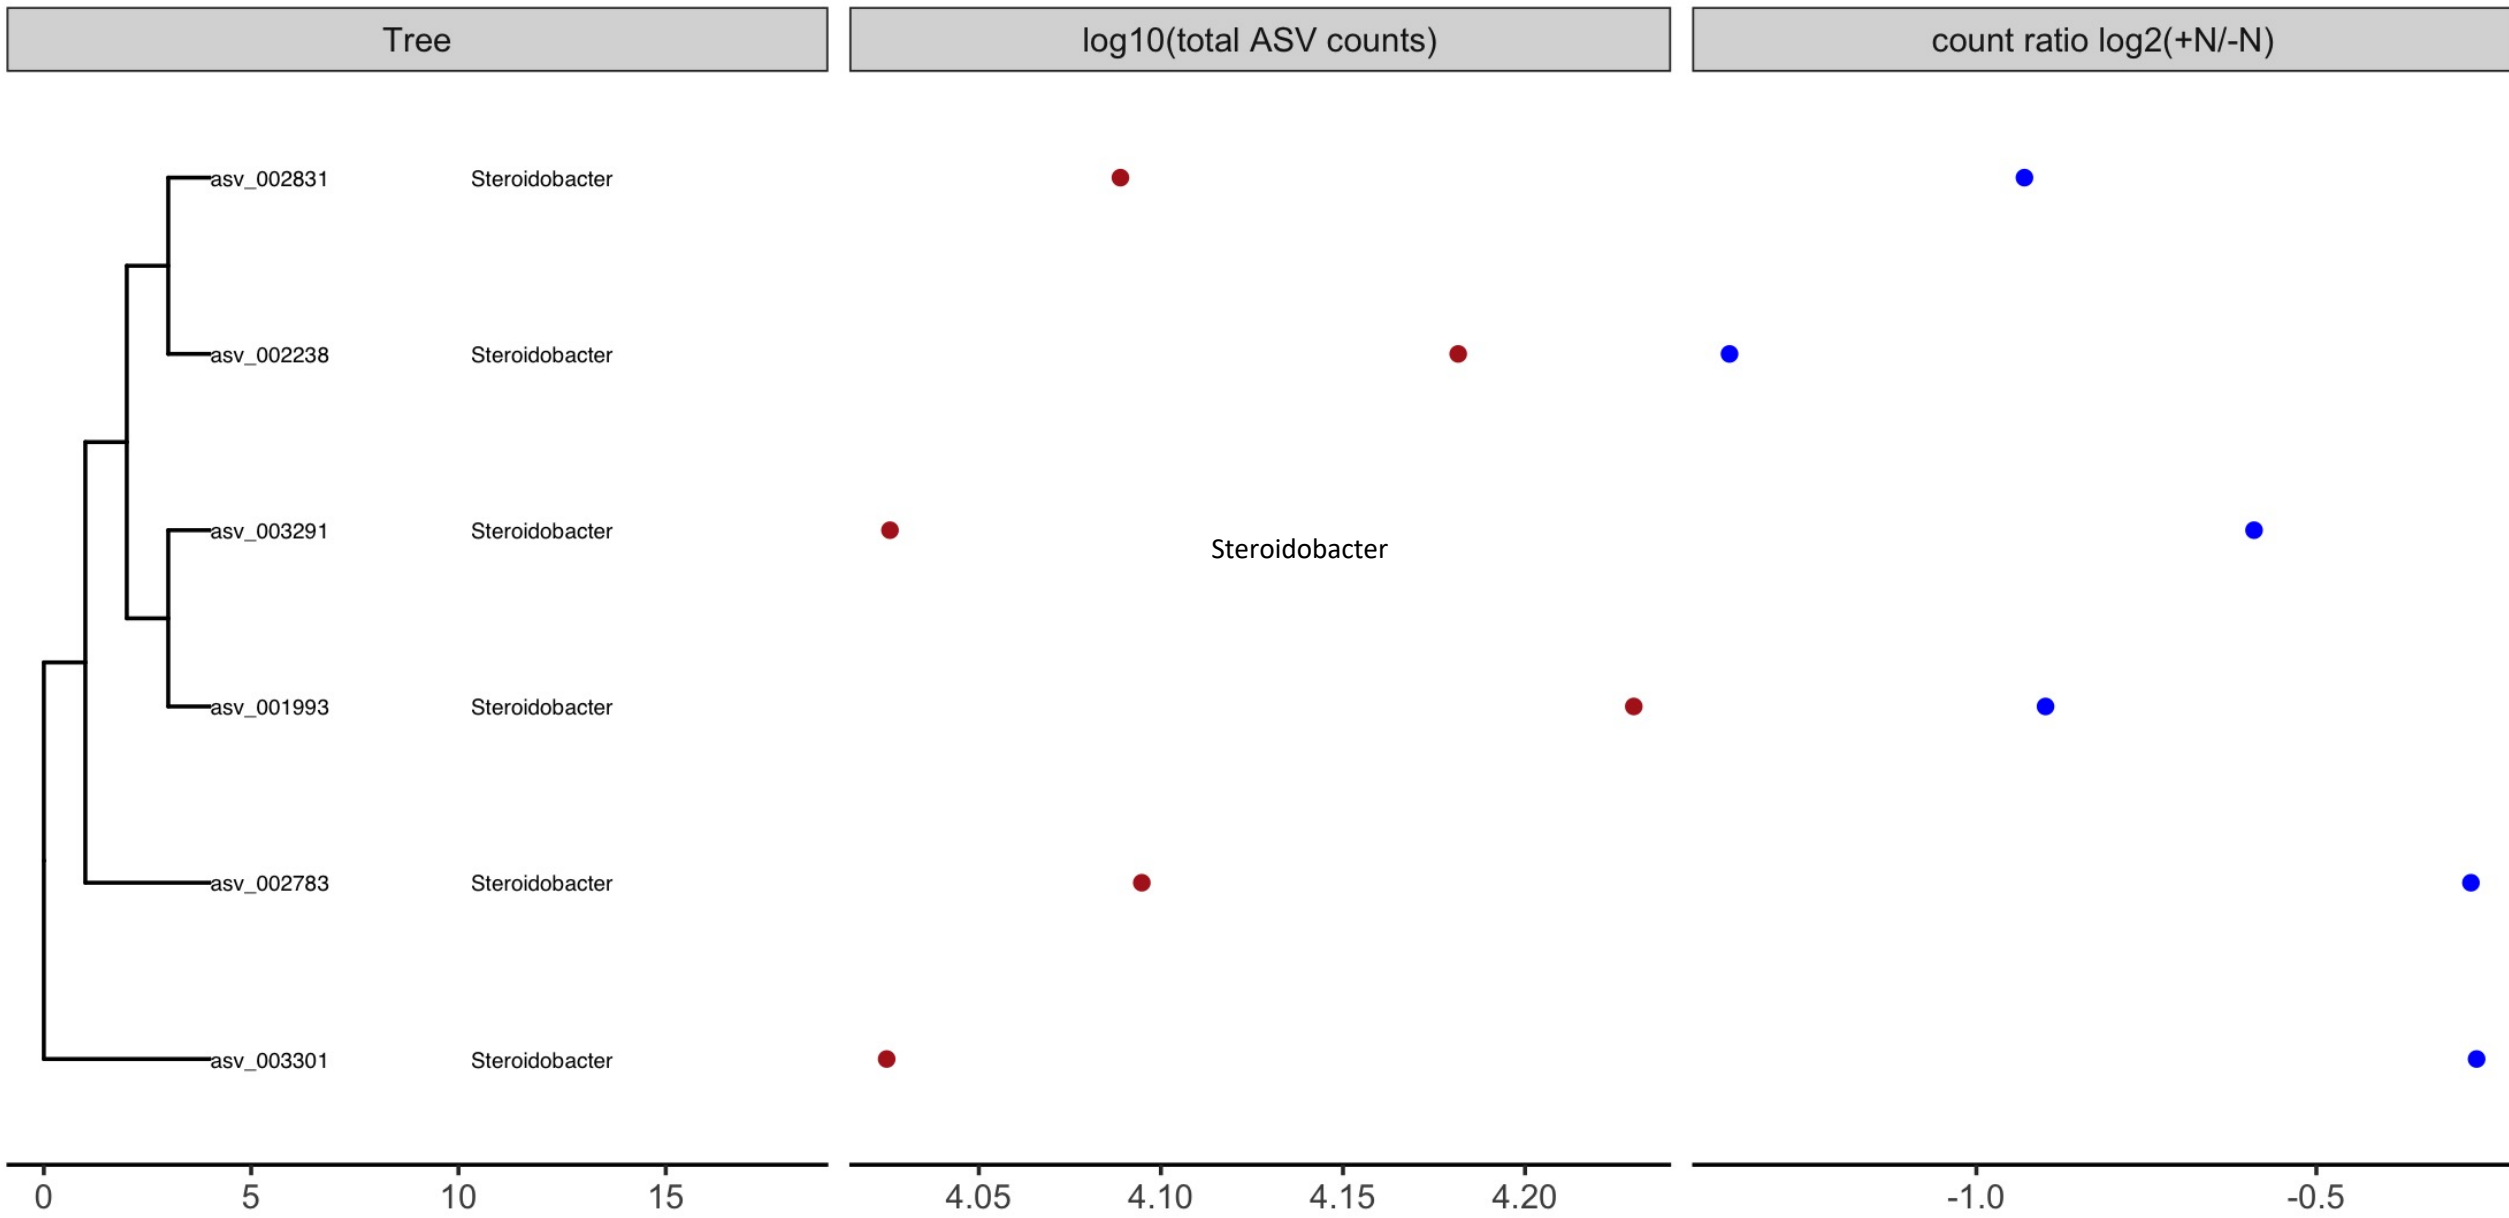

# Bryobacteraceae

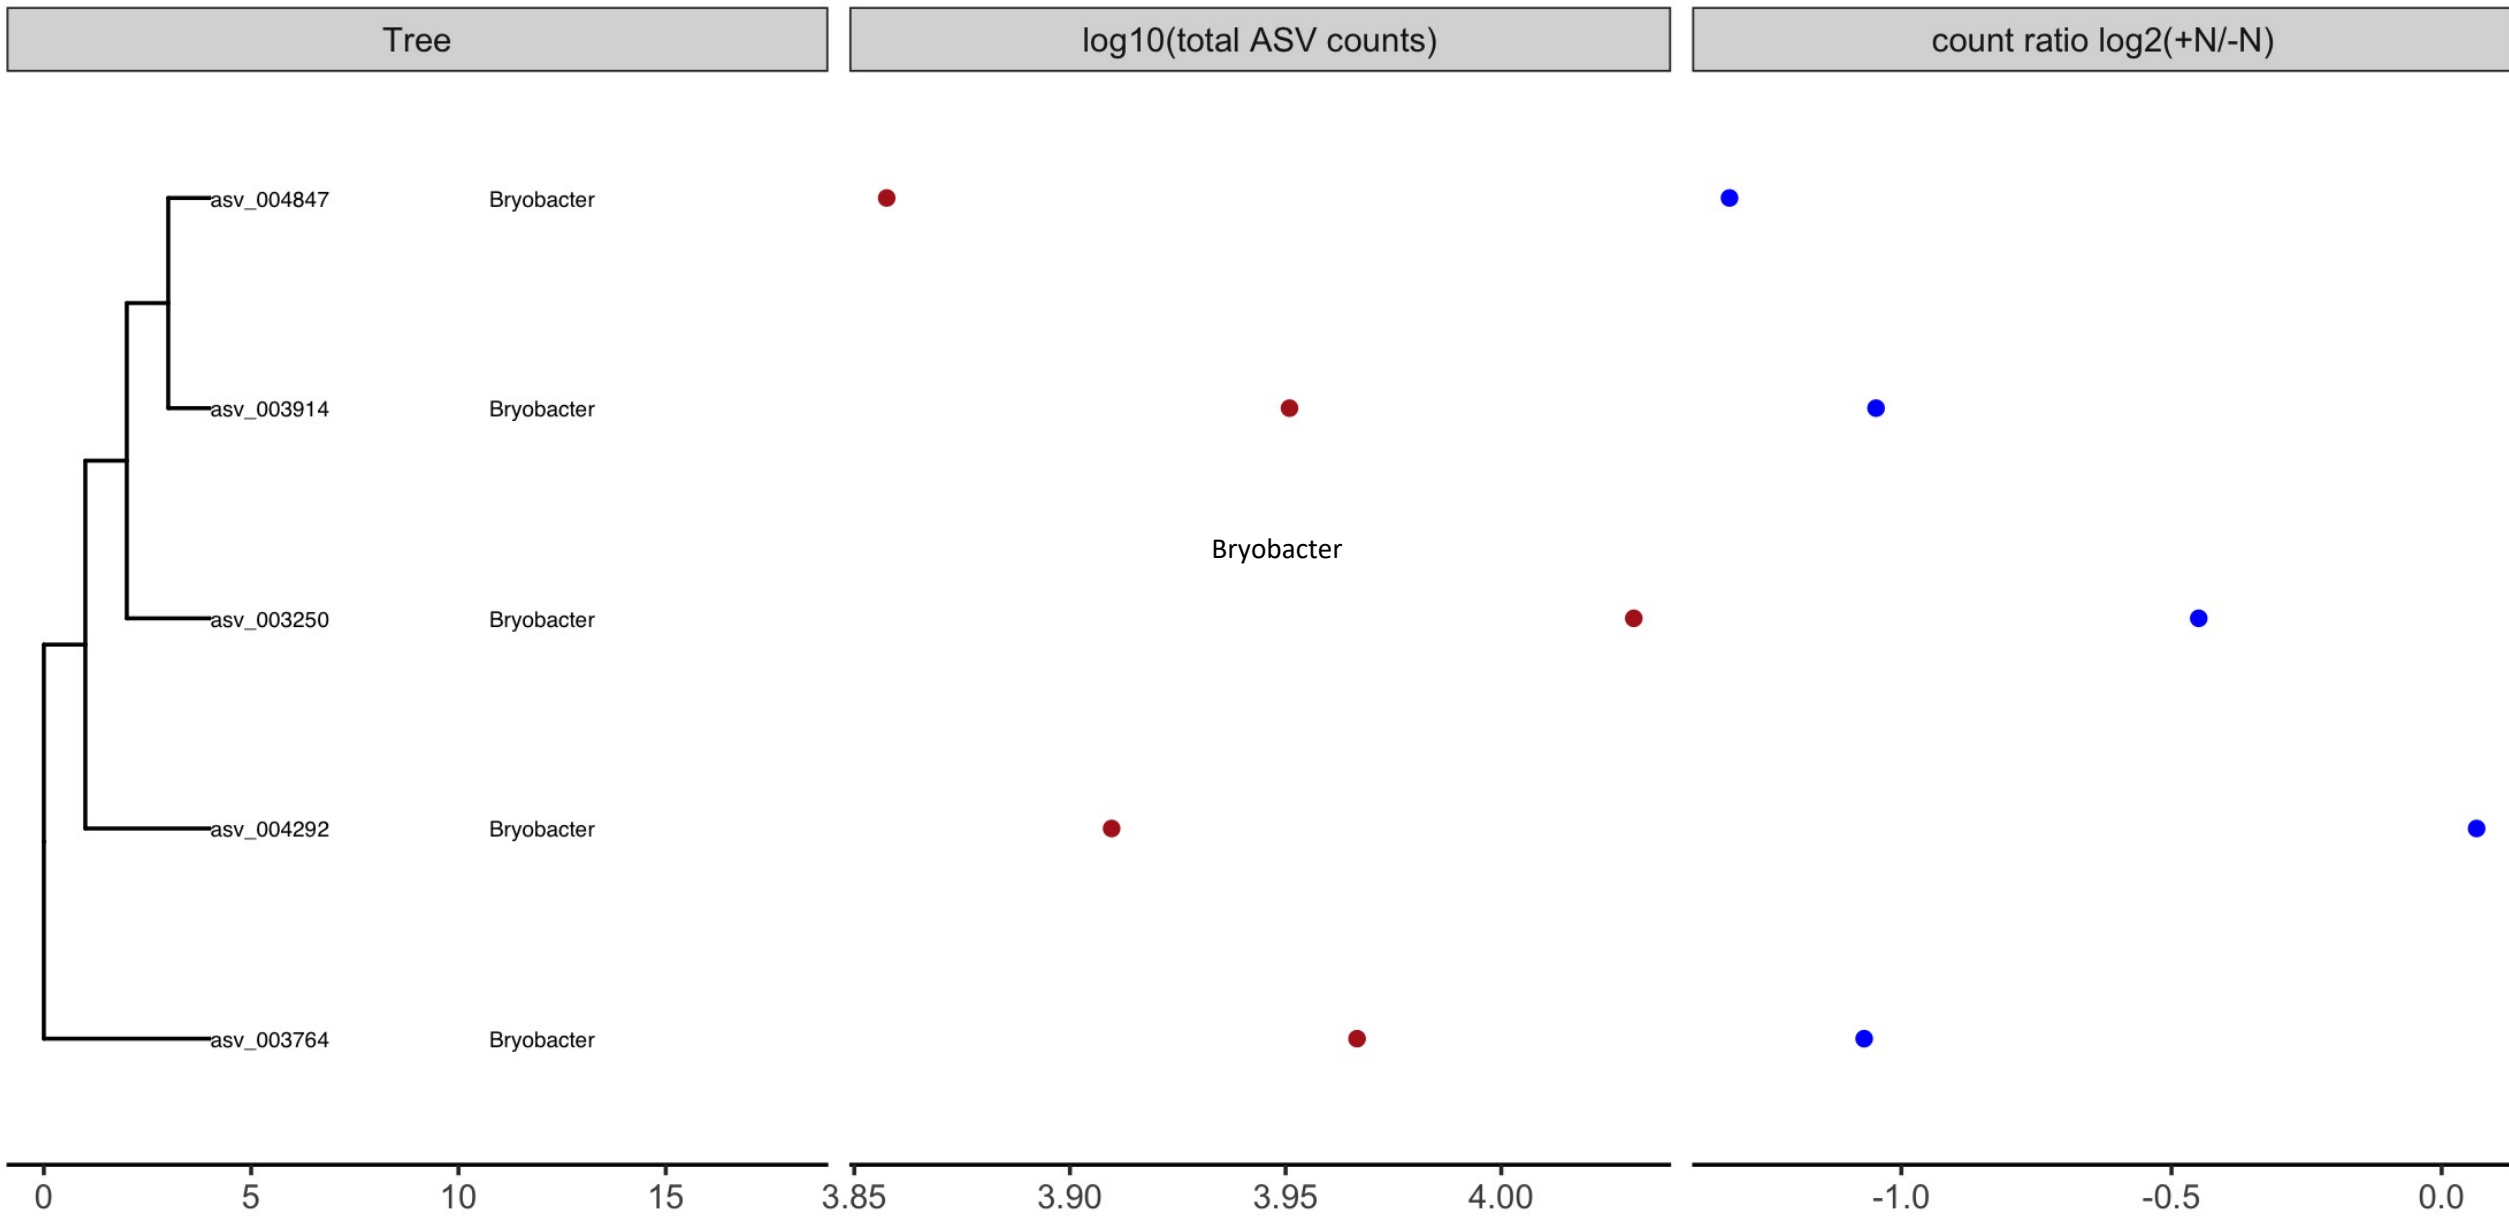

# Myxococcaceae

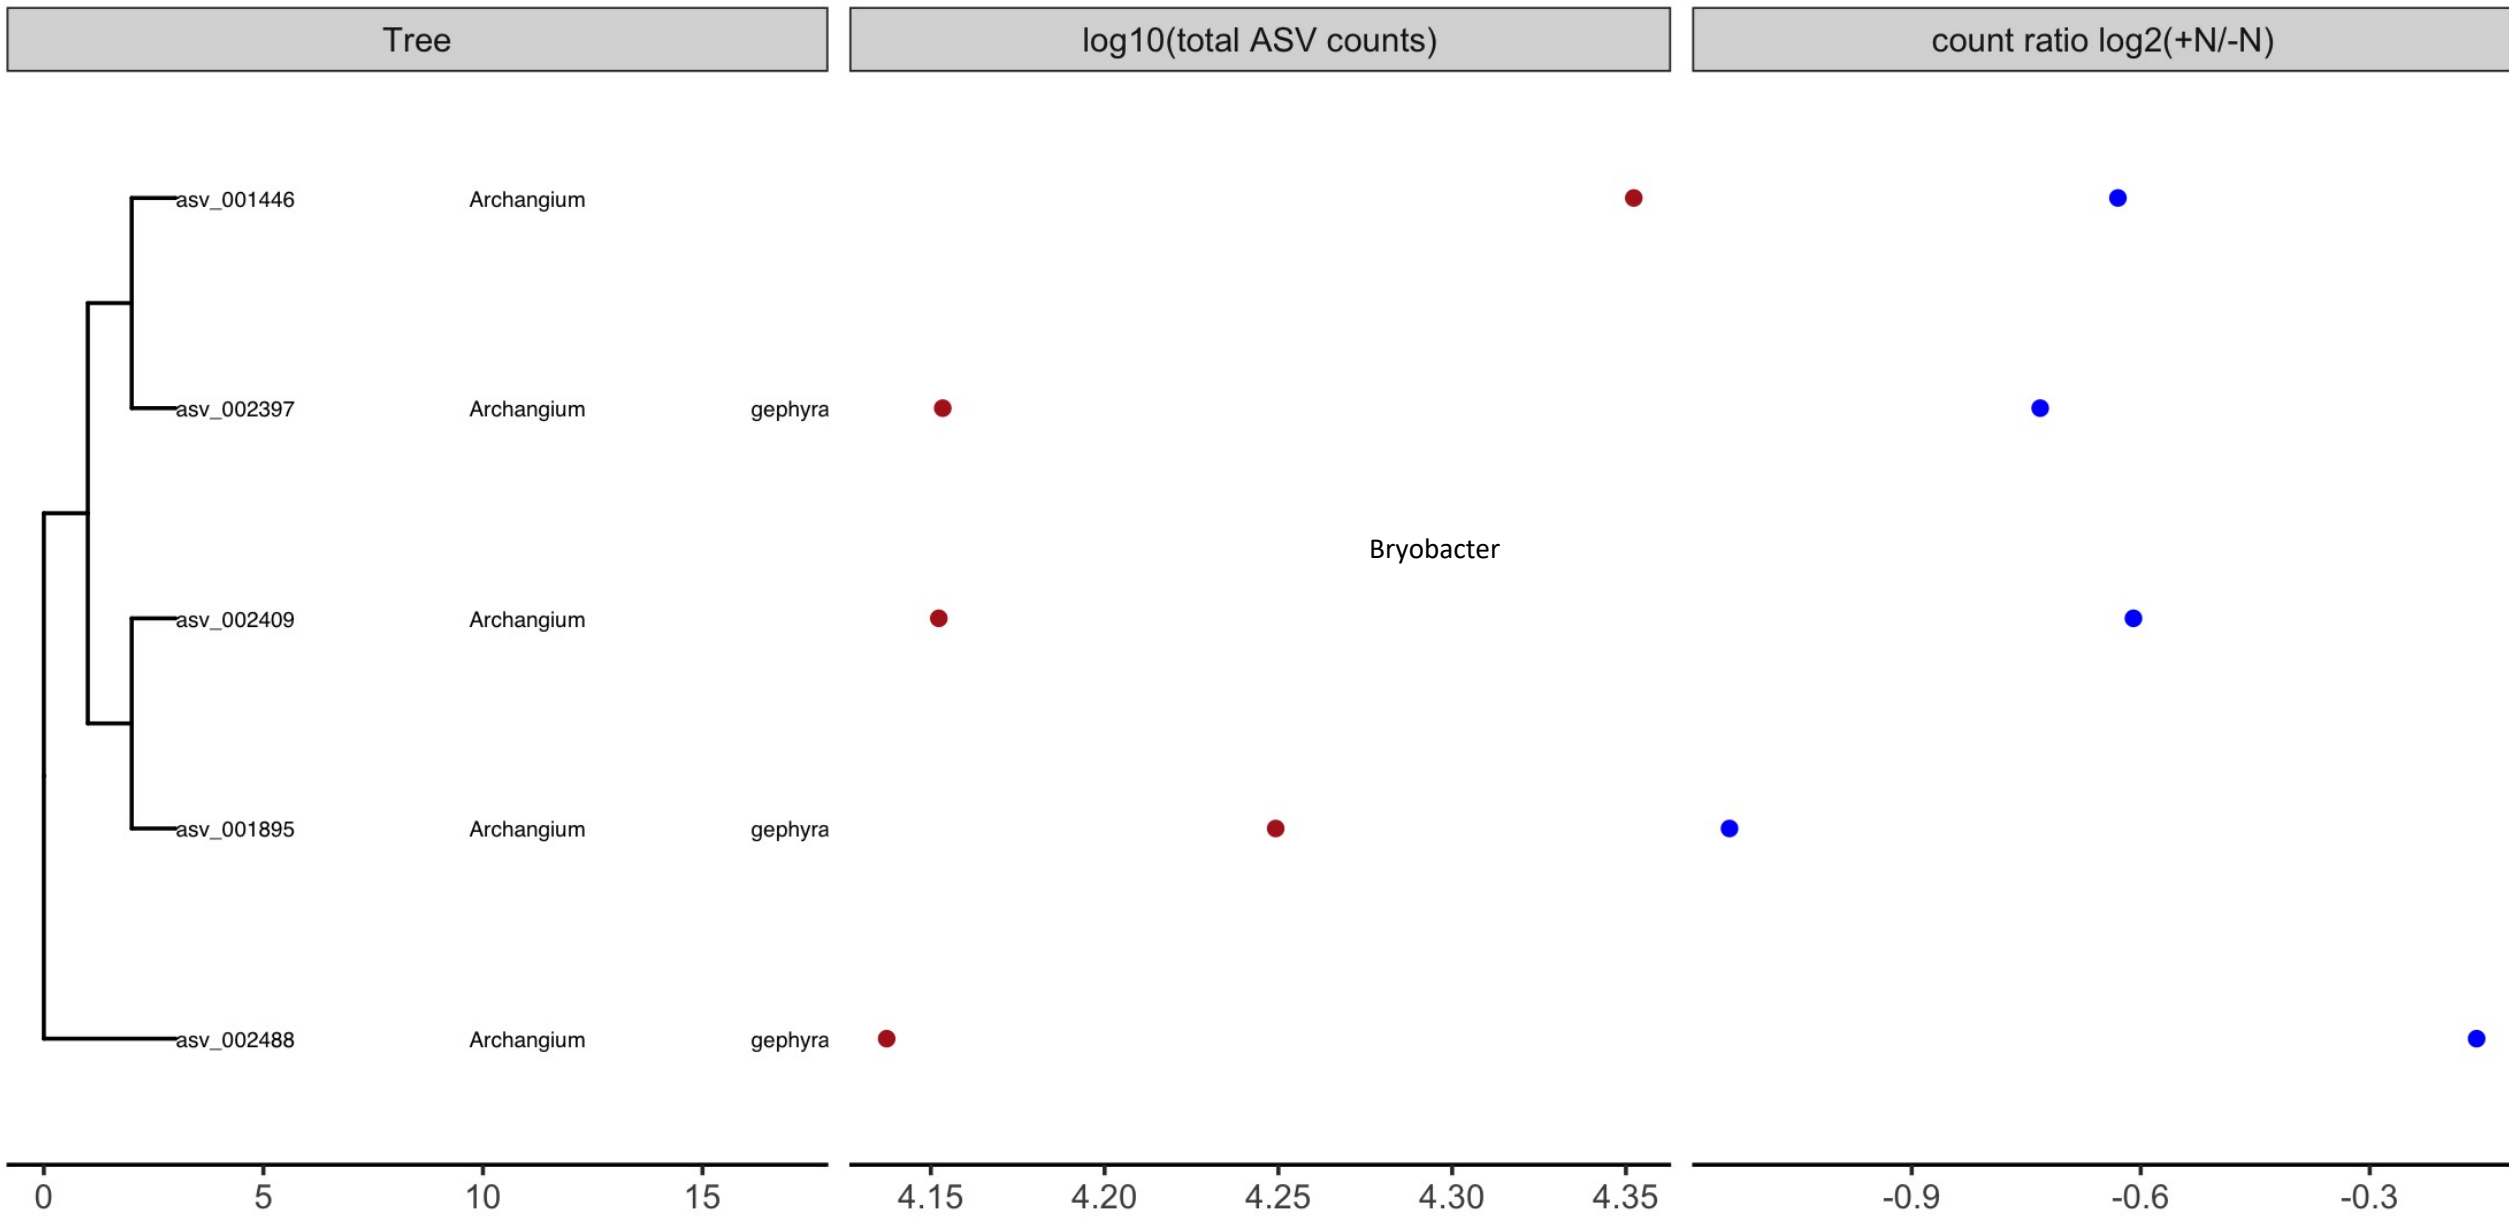

# Nitrosomonadaceae

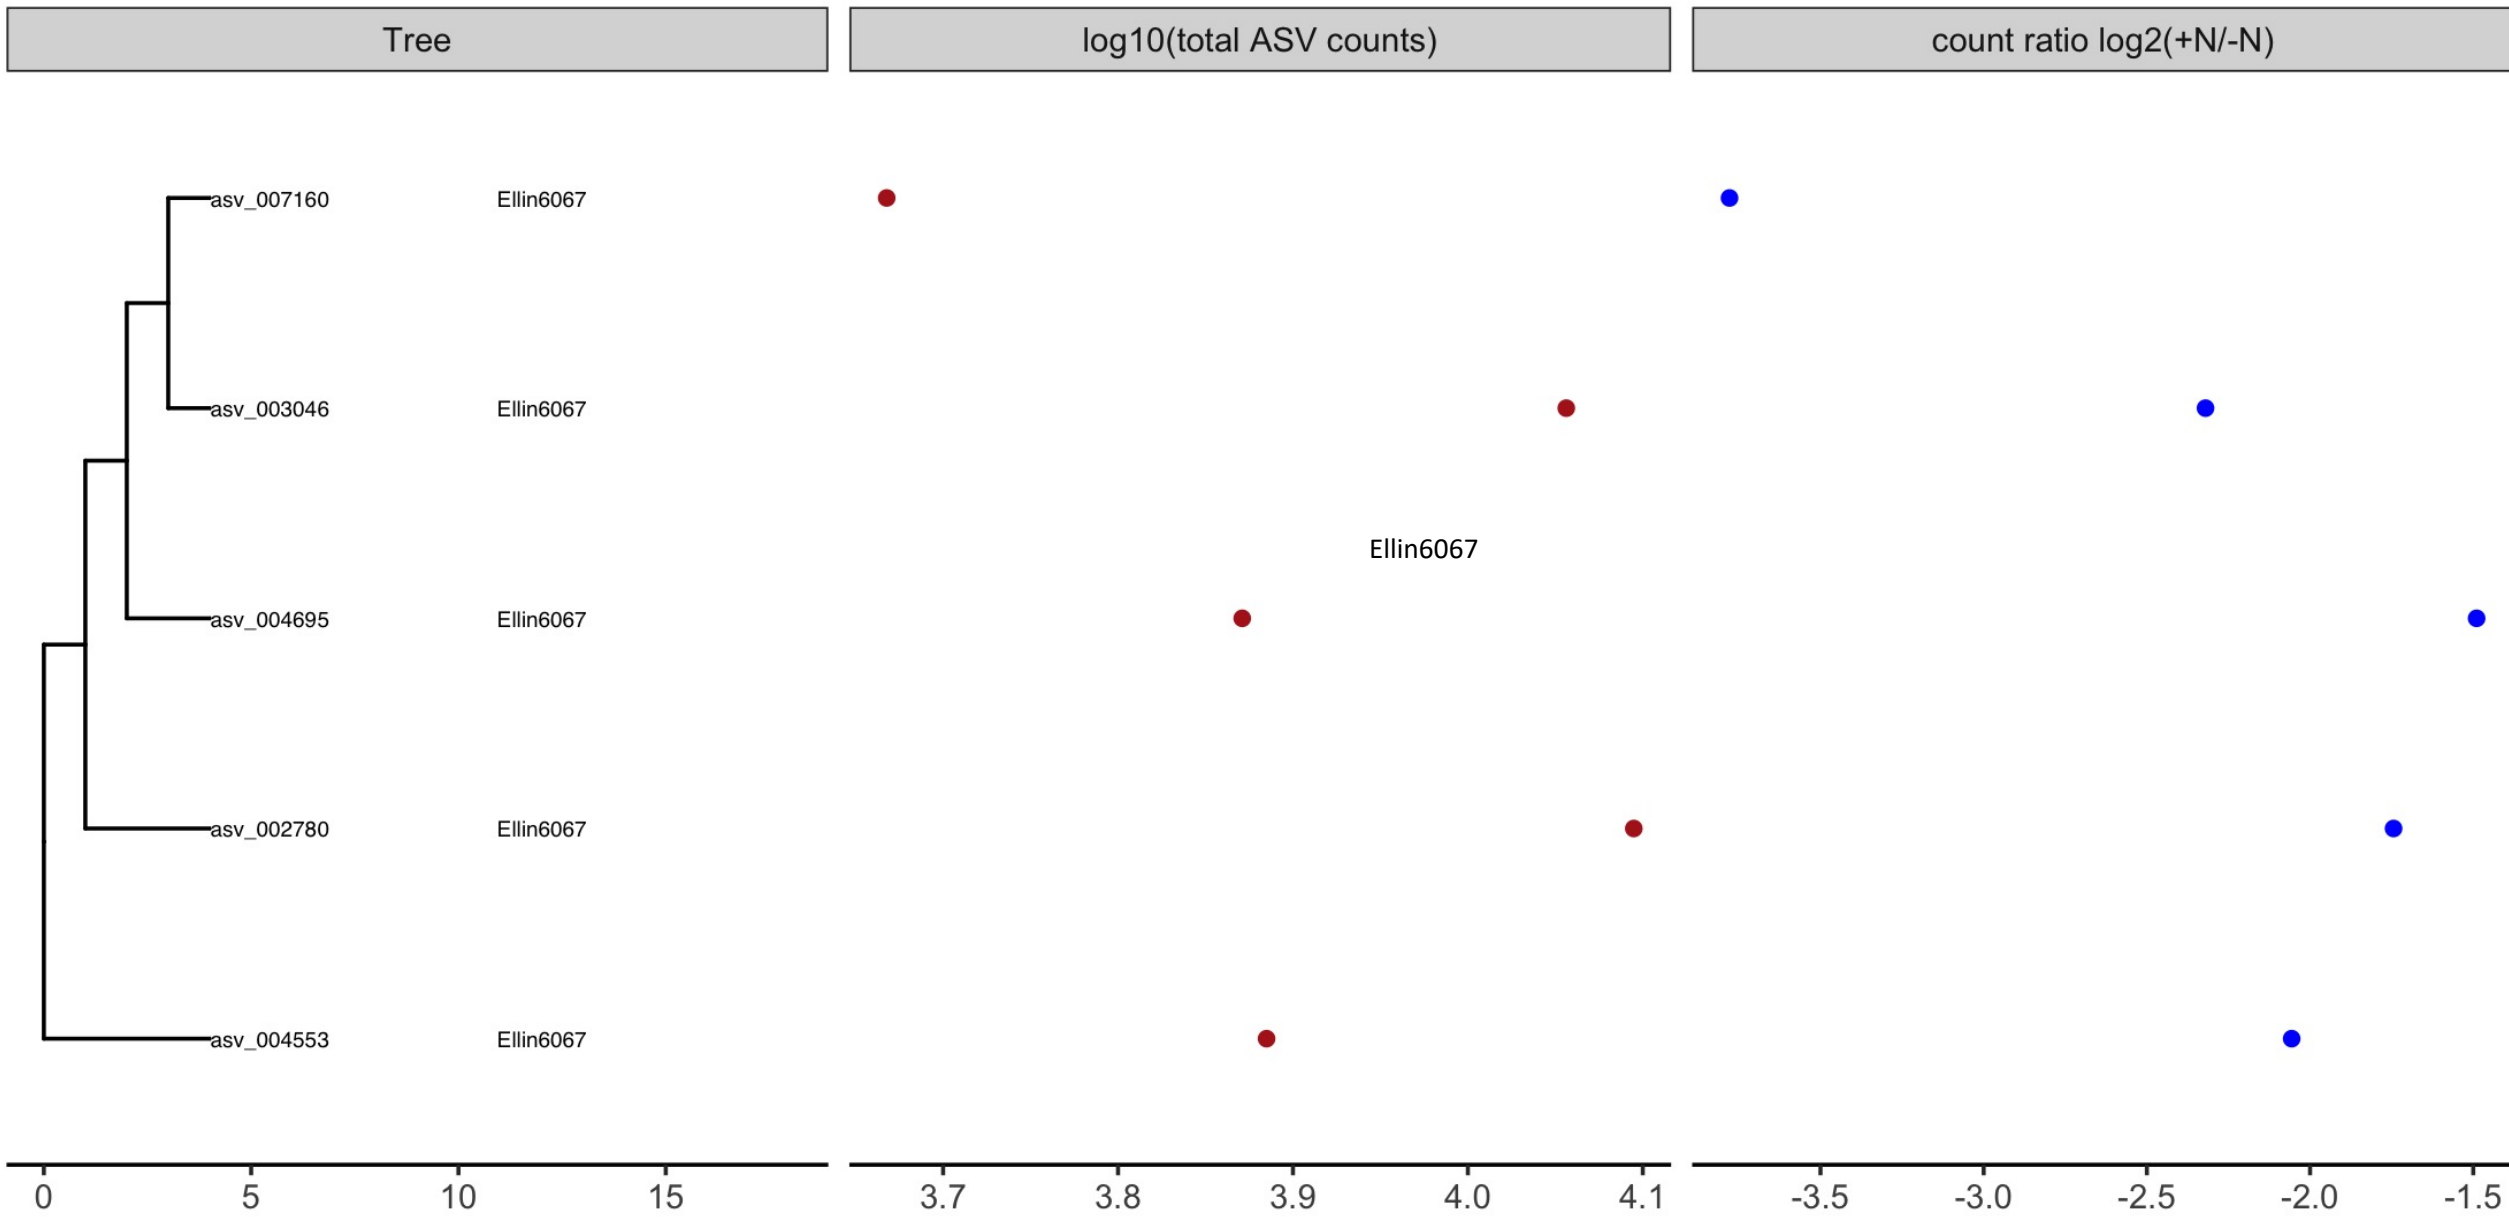

Supplement: supp [file elife_poa_e75790_Supplementary_file_6.pdf › elife_poa_e75790_Supplementary_file_6.pdf]
