# Supplementary material for: Association analyses of host genetics, root-colonizing microbes, and plant phenotypes under different nitrogen conditions in maize
Source: eLife. 2022 Jul 27;11:e75790. doi: 10.7554/eLife.75790 (PMC9470161; doi:10.7554/eLife.75790)
Supplement: Supplementary file 5. [file elife-75790-supp5.csv]

MAPL_id	nitrogen_treatment	chr	start_pos	end_pos	total_sign_snps	assoc_traits	assoc_genes	most_sign_snp_rs	most_sign_snp_pos	most_sign_snp_p_wald	trait_with_most_sign_snp
HN_chr8_9302	HN	8	93010001	93020000	1	Massilia putida(1)	Zm00001d009971	8-90684900	93016499	5.291353e-8	Massilia putida
HN_chr8_10445	HN	8	104440001	104450000	1	Dyadobacter fermentans 3(1)		8-101880194	104449918	3.471306e-8	Dyadobacter fermentans 3
HN_chr2_18560	HN	2	185590001	185600000	1	Luteolibacter pohnpeiensis(1)	Zm00001d005741;Zm00001d005742;Zm00001d005743	2-180819159	185590039	5.699155e-8	Luteolibacter pohnpeiensis
HN_chr2_21598	HN	2	215970001	215980000	1	Luteolibacter pohnpeiensis(1)	Zm00001d006754;Zm00001d006755;Zm00001d006756	2-209791573	215973621	3.140114e-8	Luteolibacter pohnpeiensis
HN_chr4_21615	HN	4	216140001	216150000	1	Luteolibacter pohnpeiensis(1)	Zm00001d053145;Zm00001d053146	4-212678218	216142988	1.3168039999999995e-9	Luteolibacter pohnpeiensis
HN_chr9_13474	HN	9	134730001	134740000	1	Luteolibacter pohnpeiensis(1)		9-132560016	134733185	9.394616e-9	Luteolibacter pohnpeiensis
HN_chr2_21288	HN	2	212870001	212880000	1	Pseudomonas chlororaphis(1)	Zm00001d006627;Zm00001d006628	2-206709766	212876439	2.583847e-9	Pseudomonas chlororaphis
HN_chr3_15402	HN	3	154010001	154020000	1	Pseudomonas chlororaphis(1)		3-152652308	154019764	5.788727e-8	Pseudomonas chlororaphis
HN_chr3_19522	HN	3	195210001	195220000	1	Mycobacterium(1)	Zm00001d043303	3-192345569	195217515	1.409354e-8	Mycobacterium
HN_chr3_19536	HN	3	195350001	195360000	1	Mycobacterium(1)	Zm00001d043305	3-192460033	195352022	5.959201000000002e-8	Mycobacterium
HN_chr3_1137	HN	3	11360001	11370000	1	Arthrobacter ramosus(1)		3-12059040	11364764	5.22274e-8	Arthrobacter ramosus
HN_chr2_15018	HN	2	150170001	150180000	1	Burkholderia oklahomensis(1)		2-146250598	150177307	4.293767e-8	Burkholderia oklahomensis
HN_chr3_6361	HN	3	63600001	63610000	1	Burkholderia oklahomensis(1)	Zm00001d040753	3-63557622	63606763	3.582131e-8	Burkholderia oklahomensis
HN_chr3_6386	HN	3	63850001	63860000	1	Burkholderia oklahomensis(1)	Zm00001d040759	3-63822188	63850448	5.397718000000001e-8	Burkholderia oklahomensis
HN_chr3_10619	HN	3	106180001	106190000	2	Burkholderia oklahomensis(2)	Zm00001d041221	3-92987029	106180264	4.969223e-9	Burkholderia oklahomensis
HN_chr3_10620	HN	3	106190001	106200000	2	Burkholderia oklahomensis(2)		3-92974487	106192805	3.4219800000000014e-8	Burkholderia oklahomensis
HN_chr3_10621	HN	3	106200001	106210000	1	Burkholderia oklahomensis(1)		3-92959939	106207352	4.670298000000001e-8	Burkholderia oklahomensis
HN_chr3_10626	HN	3	106250001	106260000	1	Burkholderia oklahomensis(1)		3-92916379	106250907	6.784486e-9	Burkholderia oklahomensis
HN_chr3_10627	HN	3	106260001	106270000	1	Burkholderia oklahomensis(1)	Zm00001d041222	3-92875667	106265577	1.295618e-8	Burkholderia oklahomensis
HN_chr3_10631	HN	3	106300001	106310000	1	Burkholderia oklahomensis(1)		3-92837639	106309855	6.135126999999999e-8	Burkholderia oklahomensis
HN_chr3_10632	HN	3	106310001	106320000	4	Burkholderia oklahomensis(4)		3-92841416	106313632	7.453666e-9	Burkholderia oklahomensis
HN_chr3_10635	HN	3	106340001	106350000	1	Burkholderia oklahomensis(1)		3-92869105	106348318	5.787814999999999e-9	Burkholderia oklahomensis
HN_chr3_10639	HN	3	106380001	106390000	1	Burkholderia oklahomensis(1)	Zm00001d041225	3-92802399	106381261	5.403395e-8	Burkholderia oklahomensis
HN_chr3_10640	HN	3	106390001	106400000	1	Burkholderia oklahomensis(1)	Zm00001d041225	3-92785255	106398401	1.102629e-8	Burkholderia oklahomensis
HN_chr3_10642	HN	3	106410001	106420000	2	Burkholderia oklahomensis(2)	Zm00001d041225	3-92766639	106417016	5.945558e-8	Burkholderia oklahomensis
HN_chr3_10644	HN	3	106430001	106440000	1	Burkholderia oklahomensis(1)		3-92752439	106431211	1.9068200000000003e-8	Burkholderia oklahomensis
HN_chr3_10645	HN	3	106440001	106450000	1	Burkholderia oklahomensis(1)		3-92733757	106449891	5.718066000000001e-8	Burkholderia oklahomensis
HN_chr3_10656	HN	3	106550001	106560000	17	Burkholderia oklahomensis(17)		3-92624367	106558903	2.277267e-9	Burkholderia oklahomensis
HN_chr3_10657	HN	3	106560001	106570000	25	Burkholderia oklahomensis(25)		3-92617611	106565659	7.348409e-9	Burkholderia oklahomensis
HN_chr3_10658	HN	3	106570001	106580000	8	Burkholderia oklahomensis(8)		3-92609722	106573547	1.982579e-9	Burkholderia oklahomensis
HN_chr3_10659	HN	3	106580001	106590000	10	Burkholderia oklahomensis(10)		3-92599669	106583600	2.9777400000000004e-8	Burkholderia oklahomensis
HN_chr3_10660	HN	3	106590001	106600000	2	Burkholderia oklahomensis(2)		3-92588807	106594558	4.427506e-8	Burkholderia oklahomensis
HN_chr3_10662	HN	3	106610001	106620000	1	Burkholderia oklahomensis(1)		3-92580721	106613479	5.716558e-8	Burkholderia oklahomensis
HN_chr3_10663	HN	3	106620001	106630000	1	Burkholderia oklahomensis(1)		3-92483169	106623080	1.912814e-8	Burkholderia oklahomensis
HN_chr3_10667	HN	3	106660001	106670000	2	Burkholderia oklahomensis(2)		3-92528303	106668242	2.972586000000001e-8	Burkholderia oklahomensis
HN_chr3_10668	HN	3	106670001	106680000	2	Burkholderia oklahomensis(2)		3-92462850	106676191	1.858991e-8	Burkholderia oklahomensis
HN_chr3_10669	HN	3	106680001	106690000	13	Burkholderia oklahomensis(13)		3-92475723	106689053	2.507003e-9	Burkholderia oklahomensis
HN_chr3_10670	HN	3	106690001	106700000	1	Burkholderia oklahomensis(1)	Zm00001d041229	3-92477299	106690628	1.348294e-8	Burkholderia oklahomensis
HN_chr3_10671	HN	3	106700001	106710000	9	Burkholderia oklahomensis(9)	Zm00001d041229;Zm00001d041230;Zm00001d041231	3-92560581	106707797	1.786245e-9	Burkholderia oklahomensis
HN_chr3_10700	HN	3	106990001	107000000	1	Burkholderia oklahomensis(1)		3-92195481	106998703	2.478421e-8	Burkholderia oklahomensis
HN_chr3_10713	HN	3	107120001	107130000	1	Burkholderia oklahomensis(1)		3-92050171	107124998	4.583737e-8	Burkholderia oklahomensis
HN_chr3_10726	HN	3	107250001	107260000	2	Burkholderia oklahomensis(2)		3-91940411	107256181	4.086802e-8	Burkholderia oklahomensis
HN_chr3_10733	HN	3	107320001	107330000	1	Burkholderia oklahomensis(1)		3-91872259	107324223	6.075903e-8	Burkholderia oklahomensis
HN_chr3_10740	HN	3	107390001	107400000	1	Burkholderia oklahomensis(1)		3-91797920	107398557	4.449885e-9	Burkholderia oklahomensis
HN_chr3_16357	HN	3	163560001	163570000	1	Burkholderia oklahomensis(1)	Zm00001d042371	3-161942157	163560731	6.347376e-8	Burkholderia oklahomensis
HN_chr7_2131	HN	7	21300001	21310000	1	Burkholderia oklahomensis(1)		7-20415036	21306292	5.601577e-8	Burkholderia oklahomensis
HN_chr1_11992	HN	1	119910001	119920000	1	Pseudomonas umsongensis(1)		1-118142893	119917917	4.1510440000000014e-8	Pseudomonas umsongensis
HN_chr1_12009	HN	1	120080001	120090000	1	Pseudomonas umsongensis(1)	Zm00001d030296	1-118321958	120082716	5.028528e-8	Pseudomonas umsongensis
HN_chr1_12086	HN	1	120850001	120860000	1	Pseudomonas umsongensis(1)		1-119078174	120859766	3.65728e-8	Pseudomonas umsongensis
HN_chr2_4152	HN	2	41510001	41520000	1	Pseudomonas umsongensis(1)	Zm00001d003358	2-40513989	41518226	3.654371e-8	Pseudomonas umsongensis
HN_chr2_18332	HN	2	183310001	183320000	1	Pseudomonas umsongensis(1)	Zm00001d005685	2-178541898	183310287	2.129681e-10	Pseudomonas umsongensis
HN_chr3_2052	HN	3	20510001	20520000	1	Pseudomonas umsongensis(1)	Zm00001d039952	3-21094310	20511746	4.746477e-8	Pseudomonas umsongensis
HN_chr7_17018	HN	7	170170001	170180000	1	Pseudomonas umsongensis(1)	Zm00001d022094	7-164651009	170171575	3.542868e-8	Pseudomonas umsongensis
HN_chr9_917	HN	9	9160001	9170000	1	Pseudomonas umsongensis(1)		9-9537769	9161122	1.819064e-8	Pseudomonas umsongensis
HN_chr10_7926	HN	10	79250001	79260000	1	Pseudomonas umsongensis(1)		10-79832653	79250268	1.267616e-8	Pseudomonas umsongensis
HN_chr4_12635	HN	4	126340001	126350000	1	f_Comamonadaceae Unknown Genus(1)	Zm00001d050844	4-123375101	126348291	4.97149e-8	f_Comamonadaceae Unknown Genus
HN_chr6_1515	HN	6	15140001	15150000	1	f_Blastocatellaceae Unknown Genus(1)		6-19756405	15143920	2.165005e-8	f_Blastocatellaceae Unknown Genus
HN_chr7_11979	HN	7	119780001	119790000	1	f_Blastocatellaceae Unknown Genus(1)	Zm00001d020510;Zm00001d020511	7-116386649	119781060	6.333082e-8	f_Blastocatellaceae Unknown Genus
HN_chr9_1117	HN	9	11160001	11170000	1	f_Blastocatellaceae Unknown Genus(1)	Zm00001d045050;Zm00001d045051	9-11727894	11165310	5.739247e-8	f_Blastocatellaceae Unknown Genus
HN_chr2_23921	HN	2	239200001	239210000	1	Phenylobacterium muchangponense(1)		2-232976219	239208377	5.489299e-8	Phenylobacterium muchangponense
HN_chr6_11206	HN	6	112050001	112060000	1	Amycolatopsis mediterranei(1)	Zm00001d037098	6-107581112	112053057	2.844779e-8	Amycolatopsis mediterranei
HN_chr6_11210	HN	6	112090001	112100000	2	Amycolatopsis mediterranei(2)		6-107619728	112097410	4.214023e-8	Amycolatopsis mediterranei
HN_chr6_11211	HN	6	112100001	112110000	1	Amycolatopsis mediterranei(1)	Zm00001d037099	6-107629293	112106934	5.002977e-9	Amycolatopsis mediterranei
HN_chr8_16675	HN	8	166740001	166750000	1	Amycolatopsis mediterranei(1)	Zm00001d012027;Zm00001d012029	8-161291945	166743984	4.80869e-8	Amycolatopsis mediterranei
HN_chr10_2645	HN	10	26440001	26450000	1	Streptomyces sp 1(1)		10-25810961	26441969	3.074603e-8	Streptomyces sp 1
HN_chr1_22604	HN	1	226030001	226040000	1	Variovorax paradoxus(1)		1-222693764	226032487	4.113404e-8	Variovorax paradoxus
HN_chr1_10172	HN	1	101710001	101720000	1	Burkholderia sp 3(1)	Zm00001d030043	1-99409678	101714400	1.49174e-9	Burkholderia sp 3
HN_chr1_11767	HN	1	117660001	117670000	1	Burkholderia sp 3(1)	Zm00001d030266	1-116064613	117662376	3.012464e-9	Burkholderia sp 3
HN_chr1_16149	HN	1	161480001	161490000	1	Burkholderia sp 3(1)	Zm00001d030815	1-160086872	161485970	1.0031889999999998e-8	Burkholderia sp 3
HN_chr1_20558	HN	1	205570001	205580000	1	Burkholderia sp 3(1)		1-202911093	205573298	4.655993e-8	Burkholderia sp 3
HN_chr1_24853	HN	1	248520001	248530000	1	Burkholderia sp 3(1)	Zm00001d033049;Zm00001d033050	1-244891729	248524704	1.08719e-9	Burkholderia sp 3
HN_chr2_21105	HN	2	211040001	211050000	1	Burkholderia sp 3(1)	Zm00001d006565;Zm00001d006566;Zm00001d006567	2-205146625	211046331	8.445450999999999e-9	Burkholderia sp 3
HN_chr2_21537	HN	2	215360001	215370000	2	Burkholderia sp 3(2)	Zm00001d006725;Zm00001d006726;Zm00001d006727	2-209193783	215364167	3.217271e-9	Burkholderia sp 3
HN_chr3_473	HN	3	4720001	4730000	1	Burkholderia sp 3(1)	Zm00001d039449;Zm00001d039450;Zm00001d039451;Zm00001d039452	3-5557799	4722135	2.656535e-10	Burkholderia sp 3
HN_chr3_15357	HN	3	153560001	153570000	1	Burkholderia sp 3(1)	Zm00001d042146	3-152215797	153565688	7.1765e-9	Burkholderia sp 3
HN_chr4_858	HN	4	8570001	8580000	1	Burkholderia sp 3(1)		4-7737256	8579356	6.402268000000002e-8	Burkholderia sp 3
HN_chr4_865	HN	4	8640001	8650000	2	Burkholderia sp 3(2)		4-7743013	8645401	3.944185e-10	Burkholderia sp 3
HN_chr4_881	HN	4	8800001	8810000	1	Burkholderia sp 3(1)		4-7975817	8805924	3.987944e-8	Burkholderia sp 3
HN_chr4_885	HN	4	8840001	8850000	2	Burkholderia sp 3(2)		4-8016288	8847795	5.142335999999999e-9	Burkholderia sp 3
HN_chr4_892	HN	4	8910001	8920000	1	Burkholderia sp 3(1)		4-8079843	8910834	3.070649e-8	Burkholderia sp 3
HN_chr4_912	HN	4	9110001	9120000	1	Burkholderia sp 3(1)		4-8279049	9113922	1.607984e-8	Burkholderia sp 3
HN_chr4_927	HN	4	9260001	9270000	1	Burkholderia sp 3(1)		4-8422360	9268236	1.147547e-8	Burkholderia sp 3
HN_chr4_928	HN	4	9270001	9280000	1	Burkholderia sp 3(1)		4-8433261	9278914	4.9096230000000006e-8	Burkholderia sp 3
HN_chr4_950	HN	4	9490001	9500000	1	Burkholderia sp 3(1)		4-8610087	9491921	4.345432e-8	Burkholderia sp 3
HN_chr4_956	HN	4	9550001	9560000	1	Burkholderia sp 3(1)		4-8685998	9553278	2.180184e-8	Burkholderia sp 3
HN_chr4_961	HN	4	9600001	9610000	1	Burkholderia sp 3(1)	Zm00001d048936	4-8757583	9601387	1.399309e-10	Burkholderia sp 3
HN_chr4_980	HN	4	9790001	9800000	1	Burkholderia sp 3(1)		4-8946691	9792903	1.856864e-9	Burkholderia sp 3
HN_chr4_984	HN	4	9830001	9840000	1	Burkholderia sp 3(1)		4-8990355	9834888	6.214928000000001e-9	Burkholderia sp 3
HN_chr4_1029	HN	4	10280001	10290000	1	Burkholderia sp 3(1)		4-9433232	10283615	3.843778e-9	Burkholderia sp 3
HN_chr4_1031	HN	4	10300001	10310000	1	Burkholderia sp 3(1)		4-9462817	10308419	5.36315e-8	Burkholderia sp 3
HN_chr4_3850	HN	4	38490001	38500000	1	Burkholderia sp 3(1)		4-36859343	38496976	2.81157e-8	Burkholderia sp 3
HN_chr4_17594	HN	4	175930001	175940000	1	Burkholderia sp 3(1)		4-172882642	175934171	5.363397e-8	Burkholderia sp 3
HN_chr4_17601	HN	4	176000001	176010000	2	Burkholderia sp 3(2)	Zm00001d051988;Zm00001d051989;Zm00001d051990	4-173021535	176006685	3.0738720000000005e-8	Burkholderia sp 3
HN_chr4_17609	HN	4	176080001	176090000	1	Burkholderia sp 3(1)		4-173094979	176080119	3.984157e-8	Burkholderia sp 3
HN_chr4_17630	HN	4	176290001	176300000	1	Burkholderia sp 3(1)		4-173278320	176299454	5.333841e-8	Burkholderia sp 3
HN_chr4_24235	HN	4	242340001	242350000	1	Burkholderia sp 3(1)		4-237628728	242341259	1.644249e-8	Burkholderia sp 3
HN_chr5_20983	HN	5	209820001	209830000	1	Burkholderia sp 3(1)	Zm00001d017901;Zm00001d017902;Zm00001d017903	5-204426049	209822489	1.314422e-8	Burkholderia sp 3
HN_chr5_20984	HN	5	209830001	209840000	1	Burkholderia sp 3(1)	Zm00001d017901;Zm00001d017902;Zm00001d017903	5-204439779	209836323	3.097807e-8	Burkholderia sp 3
HN_chr5_22349	HN	5	223480001	223490000	1	Burkholderia sp 3(1)	Zm00001d018571	5-217582329	223486580	4.18773e-8	Burkholderia sp 3
HN_chr6_6238	HN	6	62370001	62380000	1	Burkholderia sp 3(1)		6-59740808	62372522	1.820729e-8	Burkholderia sp 3
HN_chr6_16407	HN	6	164060001	164070000	1	Burkholderia sp 3(1)	Zm00001d038764;Zm00001d038765	6-160088950	164063728	1.413815e-8	Burkholderia sp 3
HN_chr7_85	HN	7	840001	850000	1	Burkholderia sp 3(1)	Zm00001d018609;Zm00001d018610;Zm00001d018611	7-988871	843925	2.441469e-8	Burkholderia sp 3
HN_chr7_95	HN	7	940001	950000	1	Burkholderia sp 3(1)		7-881835	948231	3.950886e-9	Burkholderia sp 3
HN_chr7_11502	HN	7	115010001	115020000	1	Burkholderia sp 3(1)		7-111792890	115013151	7.915657e-9	Burkholderia sp 3
HN_chr8_10548	HN	8	105470001	105480000	1	Burkholderia sp 3(1)		8-102791304	105477079	1.239569e-8	Burkholderia sp 3
HN_chr8_11033	HN	8	110320001	110330000	1	Burkholderia sp 3(1)	Zm00001d010337	8-107399415	110326595	2.4588900000000004e-8	Burkholderia sp 3
HN_chr8_13547	HN	8	135460001	135470000	1	Burkholderia sp 3(1)	Zm00001d010970;Zm00001d010971	8-131035394	135460214	3.850932999999999e-9	Burkholderia sp 3
HN_chr8_14262	HN	8	142610001	142620000	1	Burkholderia sp 3(1)	Zm00001d011193	8-138069922	142618675	3.018274e-8	Burkholderia sp 3
HN_chr9_782	HN	9	7810001	7820000	1	Burkholderia sp 3(1)	Zm00001d044940	9-8220436	7814325	2.125249e-8	Burkholderia sp 3
HN_chr9_13170	HN	9	131690001	131700000	1	Burkholderia sp 3(1)	Zm00001d047482	9-129729384	131693203	8.897325e-9	Burkholderia sp 3
HN_chr9_14577	HN	9	145760001	145770000	1	Burkholderia sp 3(1)	Zm00001d047938;Zm00001d047939	9-143299359	145767073	2.543142e-8	Burkholderia sp 3
HN_chr9_15287	HN	9	152860001	152870000	1	Burkholderia sp 3(1)	Zm00001d048230;Zm00001d048232	9-150002783	152868166	5.718457e-8	Burkholderia sp 3
HN_chr9_15343	HN	9	153420001	153430000	2	Burkholderia sp 3(2)	Zm00001d048262;Zm00001d048263	9-150518619	153421663	5.014778e-9	Burkholderia sp 3
HN_chr9_15399	HN	9	153980001	153990000	1	Burkholderia sp 3(1)	Zm00001d048291	9-151066774	153985768	1.6039379999999998e-8	Burkholderia sp 3
HN_chr9_15662	HN	9	156610001	156620000	1	Burkholderia sp 3(1)	Zm00001d048447;Zm00001d048448;Zm00001d048449	9-153727404	156617639	4.0424760000000016e-8	Burkholderia sp 3
HN_chr10_1238	HN	10	12370001	12380000	1	Burkholderia sp 3(1)	Zm00001d023619	10-12257747	12377494	3.3662160000000005e-8	Burkholderia sp 3
HN_chr10_1385	HN	10	13840001	13850000	1	Burkholderia sp 3(1)		10-13700226	13843115	8.32047e-12	Burkholderia sp 3
HN_chr10_1386	HN	10	13850001	13860000	1	Burkholderia sp 3(1)		10-13707285	13850174	4.077159e-8	Burkholderia sp 3
HN_chr10_1389	HN	10	13880001	13890000	1	Burkholderia sp 3(1)	Zm00001d023659	10-13786948	13883975	1.548041e-10	Burkholderia sp 3
HN_chr10_1398	HN	10	13970001	13980000	1	Burkholderia sp 3(1)	Zm00001d023660	10-13831745	13978572	1.510013e-12	Burkholderia sp 3
HN_chr10_1399	HN	10	13980001	13990000	1	Burkholderia sp 3(1)	Zm00001d023660	10-13837617	13984444	2.950382e-8	Burkholderia sp 3
HN_chr10_1406	HN	10	14050001	14060000	1	Burkholderia sp 3(1)		10-13911619	14059271	6.380901000000001e-8	Burkholderia sp 3
HN_chr10_1409	HN	10	14080001	14090000	1	Burkholderia sp 3(1)		10-13938341	14085992	1.019303e-9	Burkholderia sp 3
HN_chr10_1410	HN	10	14090001	14100000	2	Burkholderia sp 3(2)		10-13947811	14095462	1.000214e-9	Burkholderia sp 3
HN_chr10_1412	HN	10	14110001	14120000	2	Burkholderia sp 3(2)		10-13963545	14111195	8.127649e-12	Burkholderia sp 3
HN_chr10_11959	HN	10	119580001	119590000	1	Burkholderia sp 3(1)		10-118551957	119583959	2.698161e-8	Burkholderia sp 3
HN_chr10_14017	HN	10	140160001	140170000	1	Burkholderia sp 3(1)	Zm00001d026164;Zm00001d026165	10-138910219	140169790	7.777396e-9	Burkholderia sp 3
HN_chr4_16350	HN	4	163490001	163500000	1	Flavisolibacter-Puia(1)	Zm00001d051586;Zm00001d051587	4-160496426	163491535	3.181121e-8	Flavisolibacter-Puia
HN_chr10_552	HN	10	5510001	5520000	1	Taibaiella chishuiensis(1)		10-5847027	5515329	2.349118e-8	Taibaiella chishuiensis
HN_chr4_3530	HN	4	35290001	35300000	1	Rhizobium mesosinicum(1)	Zm00001d049560;Zm00001d049561;Zm00001d049563;Zm00001d049564	4-33724923	35297713	1.301438e-8	Rhizobium mesosinicum
HN_chr5_9609	HN	5	96080001	96090000	1	Rhizobium mesosinicum(1)		5-93697011	96087244	4.692558e-8	Rhizobium mesosinicum
HN_chr5_9619	HN	5	96180001	96190000	1	Rhizobium mesosinicum(1)		5-93796194	96185915	6.405847e-8	Rhizobium mesosinicum
HN_chr8_16914	HN	8	169130001	169140000	1	Rhizobium mesosinicum(1)	Zm00001d012158	8-163706023	169139064	3.0791209999999995e-8	Rhizobium mesosinicum
HN_chr1_26304	HN	1	263030001	263040000	1	Nitrospira japonica(1)		1-258461849	263030600	1.555375e-9	Nitrospira japonica
HN_chr3_1377	HN	3	13760001	13770000	1	Chryseobacterium gleum(1)	Zm00001d039750	3-14468859	13764025	1.776817e-8	Chryseobacterium gleum
HN_chr3_15923	HN	3	159220001	159230000	1	Chryseobacterium gleum(1)	Zm00001d042290	3-157703253	159226678	2.798765e-8	Chryseobacterium gleum
HN_chr3_15927	HN	3	159260001	159270000	1	Chryseobacterium gleum(1)		3-157741431	159265312	3.369245e-8	Chryseobacterium gleum
HN_chr4_16099	HN	4	160980001	160990000	1	Chryseobacterium gleum(1)	Zm00001d051510;Zm00001d051511	4-157534890	160987273	3.686026e-8	Chryseobacterium gleum
HN_chr5_1260	HN	5	12590001	12600000	4	Chryseobacterium gleum(4)	Zm00001d013480;Zm00001d013481	5-12168694	12598603	1.061335e-9	Chryseobacterium gleum
HN_chr5_1366	HN	5	13650001	13660000	2	Chryseobacterium gleum(2)	Zm00001d013528;Zm00001d013529;Zm00001d013530	5-13312170	13657203	3.53456e-8	Chryseobacterium gleum
HN_chr5_12644	HN	5	126430001	126440000	1	Chryseobacterium gleum(1)	Zm00001d015853	5-123300446	126433353	1.867858e-9	Chryseobacterium gleum
HN_chr5_21028	HN	5	210270001	210280000	1	Chryseobacterium gleum(1)	Zm00001d017930;Zm00001d017931;Zm00001d017932	5-204796245	210277501	1.866825e-8	Chryseobacterium gleum
HN_chr9_11643	HN	9	116420001	116430000	1	Chryseobacterium gleum(1)	Zm00001d047042;Zm00001d047043	9-113079885	116429511	2.115644e-8	Chryseobacterium gleum
HN_chr1_19981	HN	1	199800001	199810000	1	Filimonas sp 1(1)		1-197395843	199804071	3.56859e-8	Filimonas sp 1
HN_chr1_19982	HN	1	199810001	199820000	1	Filimonas sp 1(1)	Zm00001d031729	1-197411205	199819433	2.018722e-8	Filimonas sp 1
HN_chr4_13400	HN	4	133990001	134000000	1	Filimonas sp 1(1)		4-130954974	133996898	7.434132e-9	Filimonas sp 1
HN_chr8_11951	HN	8	119500001	119510000	1	Niabella yanshanensis(1)		8-116218160	119509910	5.729758000000001e-8	Niabella yanshanensis
HN_chr8_11952	HN	8	119510001	119520000	1	Niabella yanshanensis(1)		8-116210183	119517882	5.071388e-8	Niabella yanshanensis
HN_chr8_11954	HN	8	119530001	119540000	1	Niabella yanshanensis(1)		8-116233584	119533641	3.3118430000000004e-8	Niabella yanshanensis
HN_chr8_11955	HN	8	119540001	119550000	1	Niabella yanshanensis(1)		8-116241980	119542034	2.168368e-8	Niabella yanshanensis
HN_chr2_2309	HN	2	23080001	23090000	2	Chryseobacterium joostei(2)	Zm00001d002801	2-22419273	23087601	3.866491e-9	Chryseobacterium joostei
HN_chr2_15637	HN	2	156360001	156370000	1	Chryseobacterium joostei(1)		2-152295883	156368554	5.950823000000001e-8	Chryseobacterium joostei
HN_chr2_17919	HN	2	179180001	179190000	2	Chryseobacterium joostei(2)		2-174994955	179184040	6.156494e-9	Chryseobacterium joostei
HN_chr2_18750	HN	2	187490001	187500000	1	Chryseobacterium joostei(1)		2-182736174	187499044	3.5090290000000003e-9	Chryseobacterium joostei
HN_chr3_5026	HN	3	50250001	50260000	1	Chryseobacterium joostei(1)		3-50473503	50258545	2.796703e-8	Chryseobacterium joostei
HN_chr3_17980	HN	3	179790001	179800000	1	Chryseobacterium joostei(1)		3-177085836	179793213	4.291464e-8	Chryseobacterium joostei
HN_chr4_20051	HN	4	200500001	200510000	1	Chryseobacterium joostei(1)		4-196464348	200501824	2.838770000000001e-8	Chryseobacterium joostei
HN_chr7_17911	HN	7	179100001	179110000	1	Chryseobacterium joostei(1)	Zm00001d022509;Zm00001d022510	7-171747833	179101981	6.478432e-8	Chryseobacterium joostei
HN_chr8_6034	HN	8	60330001	60340000	1	Chryseobacterium joostei(1)		8-59084998	60336725	1.117408e-8	Chryseobacterium joostei
HN_chr8_8323	HN	8	83220001	83230000	1	Chryseobacterium joostei(1)		8-81155221	83228733	4.285976e-8	Chryseobacterium joostei
HN_chr8_8362	HN	8	83610001	83620000	1	Chryseobacterium joostei(1)		8-81544082	83610106	5.333671e-8	Chryseobacterium joostei
HN_chr8_8367	HN	8	83660001	83670000	1	Chryseobacterium joostei(1)		8-81597026	83663050	1.37444e-9	Chryseobacterium joostei
HN_chr8_8401	HN	8	84000001	84010000	1	Chryseobacterium joostei(1)		8-81944237	84009532	1.604638e-8	Chryseobacterium joostei
HN_chr8_8403	HN	8	84020001	84030000	1	Chryseobacterium joostei(1)		8-81958241	84023535	7.809378e-9	Chryseobacterium joostei
HN_chr8_11063	HN	8	110620001	110630000	1	Chryseobacterium joostei(1)	Zm00001d010343	8-107699084	110629937	3.00958e-9	Chryseobacterium joostei
HN_chr8_12183	HN	8	121820001	121830000	5	Chryseobacterium joostei(5)	Zm00001d010610;Zm00001d010611	8-118382538	121821878	2.02514e-8	Chryseobacterium joostei
HN_chr9_200	HN	9	1990001	2000000	1	Chryseobacterium joostei(1)	Zm00001d044772;Zm00001d044773	9-2271711	1990680	3.992528e-8	Chryseobacterium joostei
HN_chr9_5550	HN	9	55490001	55500000	1	Chryseobacterium joostei(1)		9-54316407	55498399	5.2492300000000014e-8	Chryseobacterium joostei
HN_chr9_5768	HN	9	57670001	57680000	1	Chryseobacterium joostei(1)		9-73201520	57678275	3.986534e-8	Chryseobacterium joostei
HN_chr9_5828	HN	9	58270001	58280000	1	Chryseobacterium joostei(1)		9-72622308	58276061	2.680619e-8	Chryseobacterium joostei
HN_chr4_19622	HN	4	196210001	196220000	1	Bryobacter(1)	Zm00001d052660	4-192139046	196218559	3.748573e-8	Bryobacter
HN_chr6_14236	HN	6	142350001	142360000	1	Bryobacter(1)		6-138214059	142351335	6.032633e-8	Bryobacter
HN_chr9_2673	HN	9	26720001	26730000	1	Bryobacter(1)		9-26679905	26728373	3.729968e-9	Bryobacter
HN_chr3_1126	HN	3	11250001	11260000	1	Flavobacterium anatoliense(1)		3-11958263	11255114	1.64988e-11	Flavobacterium anatoliense
HN_chr5_21536	HN	5	215350001	215360000	1	Flavobacterium anatoliense(1)	Zm00001d018142	5-209586933	215354726	7.633065e-9	Flavobacterium anatoliense
HN_chr6_16645	HN	6	166440001	166450000	1	Flavobacterium anatoliense(1)	Zm00001d038889	6-162450453	166448531	2.884713e-8	Flavobacterium anatoliense
HN_chr10_198	HN	10	1970001	1980000	1	Flavobacterium anatoliense(1)	Zm00001d023275	10-2406567	1973406	1.541295e-8	Flavobacterium anatoliense
HN_chr10_8741	HN	10	87400001	87410000	1	Flavobacterium anatoliense(1)	Zm00001d024778	10-87291061	87408169	4.628637e-8	Flavobacterium anatoliense
HN_chr3_3598	HN	3	35970001	35980000	1	Pseudomonas sp 1(1)		3-36247712	35974442	1.132095e-9	Pseudomonas sp 1
HN_chr2_2427	HN	2	24260001	24270000	1	Bacillus fumarioli(1)	Zm00001d002835;Zm00001d002836;Zm00001d002837;Zm00001d002838;Zm00001d002839;Zm00001d002841	2-23595246	24267737	3.540113e-8	Bacillus fumarioli
HN_chr2_2429	HN	2	24280001	24290000	1	Bacillus fumarioli(1)	Zm00001d002837;Zm00001d002838;Zm00001d002839;Zm00001d002841;Zm00001d002842;Zm00001d002843	2-23608129	24280910	1.012356e-8	Bacillus fumarioli
HN_chr4_2823	HN	4	28220001	28230000	1	Bacillus fumarioli(1)	Zm00001d049377	4-26729674	28222614	7.519948e-9	Bacillus fumarioli
HN_chr6_8170	HN	6	81690001	81700000	1	Bacillus fumarioli(1)		6-78864917	81691688	5.7465600000000005e-9	Bacillus fumarioli
HN_chr6_11833	HN	6	118320001	118330000	1	Bacillus fumarioli(1)	Zm00001d037254;Zm00001d037255	6-114554678	118320986	6.382575e-8	Bacillus fumarioli
HN_chr7_357	HN	7	3560001	3570000	1	Bacillus fumarioli(1)		7-3392997	3569030	6.264359e-8	Bacillus fumarioli
HN_chr7_8114	HN	7	81130001	81140000	1	Sphingomonas mali(1)	Zm00001d019971	7-78468249	81138947	3.115015e-8	Sphingomonas mali
HN_chr7_8364	HN	7	83630001	83640000	1	Sphingomonas mali(1)		7-80771271	83633925	3.159496e-8	Sphingomonas mali
HN_chr7_8460	HN	7	84590001	84600000	1	Sphingomonas mali(1)		7-81735350	84594728	1.6793150000000002e-8	Sphingomonas mali
HN_chr7_8522	HN	7	85210001	85220000	1	Sphingomonas mali(1)	Zm00001d020006;Zm00001d020008	7-82346572	85213161	1.932759e-8	Sphingomonas mali
HN_chr7_8608	HN	7	86070001	86080000	1	Sphingomonas mali(1)		7-83151560	86078270	5.508319e-8	Sphingomonas mali
HN_chr8_3500	HN	8	34990001	35000000	1	f_Chitinophagaceae Unknown Genus(1)		8-34062698	34993142	3.967223e-8	f_Chitinophagaceae Unknown Genus
HN_chr8_3503	HN	8	35020001	35030000	6	f_Chitinophagaceae Unknown Genus(6)		8-34093774	35023953	1.383699e-8	f_Chitinophagaceae Unknown Genus
HN_chr8_3506	HN	8	35050001	35060000	1	f_Chitinophagaceae Unknown Genus(1)	Zm00001d009078	8-34128135	35057834	1.116943e-8	f_Chitinophagaceae Unknown Genus
HN_chr8_3507	HN	8	35060001	35070000	5	f_Chitinophagaceae Unknown Genus(5)	Zm00001d009078	8-34134400	35064098	1.436688e-8	f_Chitinophagaceae Unknown Genus
HN_chr6_8452	HN	6	84510001	84520000	1	f_Sphingobacteriaceae Unknown Genus(1)		6-81627435	84510701	3.181956e-8	f_Sphingobacteriaceae Unknown Genus
HN_chr1_17111	HN	1	171100001	171110000	1	Delftia tsuruhatensis(1)		1-169319025	171107393	1.778805e-8	Delftia tsuruhatensis
HN_chr2_20281	HN	2	202800001	202810000	7	Delftia tsuruhatensis(7)	Zm00001d006247;Zm00001d006248	2-197159615	202803160	2.948323e-9	Delftia tsuruhatensis
HN_chr3_12305	HN	3	123040001	123050000	1	Delftia tsuruhatensis(1)		3-122739237	123042596	5.791997e-8	Delftia tsuruhatensis
HN_chr8_145	HN	8	1440001	1450000	1	Delftia tsuruhatensis(1)	Zm00001d008213;Zm00001d008214	8-1295604	1440720	3.063497e-8	Delftia tsuruhatensis
HN_chr3_14289	HN	3	142880001	142890000	1	Pseudomonas citronellolis(1)	Zm00001d041908	3-142043058	142887903	2.580396e-8	Pseudomonas citronellolis
HN_chr10_13364	HN	10	133630001	133640000	2	Pseudomonas citronellolis(2)	Zm00001d025912	10-132415264	133635475	1.446035e-8	Pseudomonas citronellolis
HN_chr6_8080	HN	6	80790001	80800000	1	Dyadobacter fermentans 2(1)		6-77966834	80796739	6.441755000000001e-8	Dyadobacter fermentans 2
HN_chr7_10481	HN	7	104800001	104810000	1	Dyadobacter fermentans 2(1)		7-101711987	104804220	6.482158e-8	Dyadobacter fermentans 2
HN_chr7_15067	HN	7	150660001	150670000	1	Dyadobacter fermentans 2(1)	Zm00001d021387;Zm00001d021388;Zm00001d021389	7-145773887	150661443	8.056848e-9	Dyadobacter fermentans 2
HN_chr3_18733	HN	3	187320001	187330000	1	Acinetobacter nosocomialis(1)		3-184404570	187328522	4.132588e-9	Acinetobacter nosocomialis
HN_chr3_18736	HN	3	187350001	187360000	8	Acinetobacter nosocomialis(8)	Zm00001d043047;Zm00001d043048	3-184434608	187357635	1.278671e-8	Acinetobacter nosocomialis
HN_chr3_18739	HN	3	187380001	187390000	1	Acinetobacter nosocomialis(1)		3-184461537	187389052	5.949032e-8	Acinetobacter nosocomialis
HN_chr3_18740	HN	3	187390001	187400000	1	Acinetobacter nosocomialis(1)		3-184465892	187393407	4.891442e-8	Acinetobacter nosocomialis
HN_chr3_18741	HN	3	187400001	187410000	4	Acinetobacter nosocomialis(4)	Zm00001d043049	3-184477955	187405468	4.891442e-8	Acinetobacter nosocomialis
HN_chr4_14611	HN	4	146100001	146110000	1	Ilumatobacter(1)		4-142810846	146103535	4.794725e-8	Ilumatobacter
HN_chr3_2688	HN	3	26870001	26880000	1	f_A21b(1)		3-27330304	26870535	6.016651999999999e-8	f_A21b
HN_chr9_9225	HN	9	92240001	92250000	1	f_A21b(1)	Zm00001d046491	9-89886159	92241606	9.320554e-9	f_A21b
HN_chr9_9230	HN	9	92290001	92300000	1	f_A21b(1)	Zm00001d046492	9-89931254	92297008	2.897957e-8	f_A21b
HN_chr9_9262	HN	9	92610001	92620000	3	f_A21b(3)		9-90243936	92612325	3.319053e-9	f_A21b
HN_chr9_9270	HN	9	92690001	92700000	1	f_A21b(1)		9-90328683	92697066	5.10042e-8	f_A21b
HN_chr9_9271	HN	9	92700001	92710000	1	f_A21b(1)		9-90354576	92703515	4.869317e-8	f_A21b
HN_chr9_9274	HN	9	92730001	92740000	1	f_A21b(1)	Zm00001d046500	9-90381821	92730759	2.859779e-8	f_A21b
HN_chr9_9275	HN	9	92740001	92750000	2	f_A21b(2)	Zm00001d046500	9-90347216	92742300	3.326549e-8	f_A21b
HN_chr5_8964	HN	5	89630001	89640000	1	f_LWQ8(1)	Zm00001d015428	5-87410323	89636925	3.975737e-8	f_LWQ8
HN_chr5_8965	HN	5	89640001	89650000	2	f_LWQ8(2)		5-87416423	89643025	4.02819e-8	f_LWQ8
HN_chr5_8967	HN	5	89660001	89670000	1	f_LWQ8(1)	Zm00001d015429;Zm00001d015430;Zm00001d015431;Zm00001d015432	5-87439768	89665379	1.377894e-8	f_LWQ8
HN_chr5_8968	HN	5	89670001	89680000	2	f_LWQ8(2)	Zm00001d015429;Zm00001d015430;Zm00001d015431;Zm00001d015432	5-87446499	89671471	1.303753e-8	f_LWQ8
HN_chr9_14464	HN	9	144630001	144640000	1	f_LWQ8(1)	Zm00001d047896	9-142206892	144637706	5.139889e-8	f_LWQ8
HN_chr4_415	HN	4	4140001	4150000	1	Pseudomonas thivervalensis(1)	Zm00001d048716;Zm00001d048717;Zm00001d048718	4-3453793	4142729	3.100434e-8	Pseudomonas thivervalensis
HN_chr4_20357	HN	4	203560001	203570000	1	Pseudomonas thivervalensis(1)		4-199415661	203566280	2.3948080000000003e-8	Pseudomonas thivervalensis
HN_chr6_16631	HN	6	166300001	166310000	1	Chryseobacterium sp 1(1)	Zm00001d038878;Zm00001d038879;Zm00001d038880;Zm00001d038881	6-162311349	166308403	6.313629e-8	Chryseobacterium sp 1
HN_chr2_17770	HN	2	177690001	177700000	1	Dyadobacter fermentans 1(1)		2-173527411	177696348	4.095311e-8	Dyadobacter fermentans 1
HN_chr3_16901	HN	3	169000001	169010000	1	Stenotrophomonas maltophilia(1)	Zm00001d042476;Zm00001d042478;Zm00001d042479	3-166419843	169000555	1.7108e-8	Stenotrophomonas maltophilia
HN_chr10_1249	HN	10	12480001	12490000	3	Stenotrophomonas maltophilia(3)	Zm00001d023620	10-12368254	12481593	7.002375e-11	Stenotrophomonas maltophilia
HN_chr1_3053	HN	1	30520001	30530000	1	Chitinophaga filiformis(1)	Zm00001d028317	1-30267017	30526435	5.058644e-8	Chitinophaga filiformis
HN_chr1_3054	HN	1	30530001	30540000	2	Chitinophaga filiformis(2)	Zm00001d028317	1-30279979	30539397	2.265527e-8	Chitinophaga filiformis
HN_chr3_19143	HN	3	191420001	191430000	1	Chitinophaga filiformis(1)	Zm00001d043199;Zm00001d043200;Zm00001d043201;Zm00001d043202	3-188580483	191423200	3.800924e-8	Chitinophaga filiformis
HN_chr8_2253	HN	8	22520001	22530000	1	Chitinophaga filiformis(1)	Zm00001d008849	8-21851613	22524145	5.756295e-9	Chitinophaga filiformis
HN_chr8_8071	HN	8	80700001	80710000	1	Chitinophaga filiformis(1)		8-78776539	80708688	1.105585e-8	Chitinophaga filiformis
HN_chr8_8088	HN	8	80870001	80880000	1	Chitinophaga filiformis(1)		8-78976570	80878316	4.739444e-9	Chitinophaga filiformis
HN_chr8_8103	HN	8	81020001	81030000	1	Chitinophaga filiformis(1)		8-79079371	81022000	1.198293e-8	Chitinophaga filiformis
HN_chr8_8158	HN	8	81570001	81580000	1	Chitinophaga filiformis(1)	Zm00001d009790;Zm00001d009791;Zm00001d009792	8-79552187	81575765	1.966604e-8	Chitinophaga filiformis
HN_chr8_8176	HN	8	81750001	81760000	1	Chitinophaga filiformis(1)	Zm00001d009793;Zm00001d009794;Zm00001d009795	8-79733158	81759554	1.162601e-8	Chitinophaga filiformis
HN_chr8_8265	HN	8	82640001	82650000	1	Chitinophaga filiformis(1)		8-80660107	82644205	4.972455e-8	Chitinophaga filiformis
HN_chr1_29400	HN	1	293990001	294000000	1	Luteibacter yeojuensis(1)	Zm00001d034471;Zm00001d034473	1-288711013	293994988	5.988659e-8	Luteibacter yeojuensis
HN_chr10_747	HN	10	7460001	7470000	1	RB41 sp 2(1)	Zm00001d023501	10-7563742	7465464	4.01189e-9	RB41 sp 2
HN_chr2_23683	HN	2	236820001	236830000	5	Sphingoaurantiacus(5)	Zm00001d007643;Zm00001d007644;Zm00001d007645;Zm00001d007646;Zm00001d007647	2-230389923	236826599	5.508999999999999e-9	Sphingoaurantiacus
HN_chr2_23684	HN	2	236830001	236840000	2	Sphingoaurantiacus(2)	Zm00001d007645;Zm00001d007646;Zm00001d007647	2-230396353	236833029	5.594249e-8	Sphingoaurantiacus
HN_chr2_23685	HN	2	236840001	236850000	1	Sphingoaurantiacus(1)	Zm00001d007645;Zm00001d007646;Zm00001d007647	2-230412721	236849396	5.375073e-8	Sphingoaurantiacus
HN_chr2_23688	HN	2	236870001	236880000	1	Sphingoaurantiacus(1)		2-230434498	236871172	3.313225e-8	Sphingoaurantiacus
HN_chr2_23689	HN	2	236880001	236890000	1	Sphingoaurantiacus(1)		2-230451703	236888184	4.3647019999999993e-8	Sphingoaurantiacus
HN_chr1_25096	HN	1	250950001	250960000	1	Nocardioides(1)	Zm00001d033121	1-247123777	250950850	6.144202e-8	Nocardioides
HN_chr4_18591	HN	4	185900001	185910000	1	Microbacterium testaceum(1)	Zm00001d052281	4-182721842	185903573	4.942644e-8	Microbacterium testaceum
HN_chr4_18597	HN	4	185960001	185970000	1	Microbacterium testaceum(1)	Zm00001d052282;Zm00001d052285	4-182780915	185962641	4.355585e-8	Microbacterium testaceum
HN_chr9_13845	HN	9	138440001	138450000	2	Neorhizobium(2)	Zm00001d047662	9-136140235	138440117	2.421697e-8	Neorhizobium
HN_chr4_18619	HN	4	186180001	186190000	1	Acidothermus(1)		4-182991365	186180899	3.8188440000000005e-8	Acidothermus
HN_chr4_18622	HN	4	186210001	186220000	1	Acidothermus(1)		4-183020919	186210343	4.582131e-8	Acidothermus
HN_chr4_18625	HN	4	186240001	186250000	1	Acidothermus(1)	Zm00001d052294	4-183057040	186246461	3.105909e-8	Acidothermus
HN_chr4_18646	HN	4	186450001	186460000	1	Acidothermus(1)		4-183261953	186452851	4.461919e-8	Acidothermus
HN_chr4_18651	HN	4	186500001	186510000	1	Acidothermus(1)	Zm00001d052302;Zm00001d052303	4-183300934	186502170	4.391378e-8	Acidothermus
HN_chr4_18655	HN	4	186540001	186550000	2	Acidothermus(2)		4-183312216	186543148	3.205804e-9	Acidothermus
HN_chr4_18660	HN	4	186590001	186600000	1	Acidothermus(1)	Zm00001d052306;Zm00001d052307	4-183389978	186594241	5.730034e-8	Acidothermus
HN_chr4_18661	HN	4	186600001	186610000	10	Acidothermus(10)	Zm00001d052306;Zm00001d052307	4-183403666	186607929	1.8003419999999997e-8	Acidothermus
HN_chr4_18662	HN	4	186610001	186620000	2	Acidothermus(2)	Zm00001d052307	4-183408040	186612303	9.778915000000002e-9	Acidothermus
HN_chr4_18664	HN	4	186630001	186640000	2	Acidothermus(2)		4-183433654	186637915	1.909919e-8	Acidothermus
HN_chr4_18665	HN	4	186640001	186650000	3	Acidothermus(3)		4-183443584	186647845	1.717603e-8	Acidothermus
HN_chr4_18666	HN	4	186650001	186660000	11	Acidothermus(11)		4-183447253	186651514	1.3290950000000002e-8	Acidothermus
HN_chr4_18667	HN	4	186660001	186670000	12	Acidothermus(12)		4-183462757	186667017	6.892854000000001e-9	Acidothermus
HN_chr4_18668	HN	4	186670001	186680000	2	Acidothermus(2)		4-183470463	186674721	3.277083e-8	Acidothermus
HN_chr4_18669	HN	4	186680001	186690000	5	Acidothermus(5)		4-183480375	186684483	9.787843e-9	Acidothermus
HN_chr4_18670	HN	4	186690001	186700000	3	Acidothermus(3)	Zm00001d052308	4-183490903	186695010	2.38541e-8	Acidothermus
HN_chr4_18671	HN	4	186700001	186710000	10	Acidothermus(10)	Zm00001d052308	4-183505878	186706028	1.457476e-8	Acidothermus
HN_chr4_18672	HN	4	186710001	186720000	8	Acidothermus(8)	Zm00001d052308	4-183515877	186716027	1.079109e-8	Acidothermus
HN_chr4_18674	HN	4	186730001	186740000	2	Acidothermus(2)	Zm00001d052308	4-183553950	186738676	1.912349e-8	Acidothermus
HN_chr4_18676	HN	4	186750001	186760000	6	Acidothermus(6)	Zm00001d052310;Zm00001d052311;Zm00001d052312	4-183565649	186757977	7.123415e-9	Acidothermus
HN_chr4_18677	HN	4	186760001	186770000	2	Acidothermus(2)	Zm00001d052310;Zm00001d052311;Zm00001d052312	4-183575574	186767902	1.50177e-8	Acidothermus
HN_chr4_18678	HN	4	186770001	186780000	1	Acidothermus(1)	Zm00001d052310;Zm00001d052311;Zm00001d052312	4-183584798	186777126	5.62802e-8	Acidothermus
HN_chr4_18681	HN	4	186800001	186810000	1	Acidothermus(1)		4-183607349	186808087	5.718983e-8	Acidothermus
HN_chr4_18683	HN	4	186820001	186830000	1	Acidothermus(1)	Zm00001d052314	4-183628747	186829485	6.30591e-8	Acidothermus
HN_chr4_18691	HN	4	186900001	186910000	1	Acidothermus(1)		4-183711546	186908271	2.728634e-8	Acidothermus
HN_chr4_18692	HN	4	186910001	186920000	1	Acidothermus(1)		4-183708655	186911538	4.591985e-8	Acidothermus
HN_chr4_18695	HN	4	186940001	186950000	1	Acidothermus(1)		4-183673360	186943432	3.547281e-8	Acidothermus
HN_chr4_18698	HN	4	186970001	186980000	2	Acidothermus(2)	Zm00001d052315;Zm00001d052316;Zm00001d052317	4-183763554	186978840	4.4403510000000014e-8	Acidothermus
HN_chr1_28884	HN	1	288830001	288840000	1	Chitinophaga polysaccharea(1)	Zm00001d034301	1-283788247	288836346	5.766074999999999e-9	Chitinophaga polysaccharea
HN_chr5_21472	HN	5	214710001	214720000	1	Chitinophaga polysaccharea(1)	Zm00001d018121;Zm00001d018122;Zm00001d018123	5-208972723	214719193	2.773051e-8	Chitinophaga polysaccharea
HN_chr5_21859	HN	5	218580001	218590000	1	Chitinophaga polysaccharea(1)	Zm00001d018331;Zm00001d018332;Zm00001d018333	5-212799683	218588567	2.726845e-8	Chitinophaga polysaccharea
HN_chr6_9476	HN	6	94750001	94760000	1	Chitinophaga polysaccharea(1)		6-92296520	94750508	2.123301e-8	Chitinophaga polysaccharea
HN_chr9_2444	HN	9	24430001	24440000	1	Chitinophaga polysaccharea(1)	Zm00001d045492;Zm00001d045493;Zm00001d045494;Zm00001d045495	9-24494830	24433767	9.848305e-9	Chitinophaga polysaccharea
HN_chr9_14837	HN	9	148360001	148370000	1	Chitinophaga polysaccharea(1)	Zm00001d048027;Zm00001d048028;Zm00001d048029	9-145783963	148366871	4.403819e-8	Chitinophaga polysaccharea
HN_chr9_14840	HN	9	148390001	148400000	1	Chitinophaga polysaccharea(1)		9-145812179	148396003	3.3687699999999994e-8	Chitinophaga polysaccharea
HN_chr2_20188	HN	2	201870001	201880000	1	Bacillus aryabhattai(1)	Zm00001d006208	2-196277328	201873955	2.851025e-8	Bacillus aryabhattai
HN_chr1_18538	HN	1	185370001	185380000	1	Acinetobacter bouvetii(1)		1-183383710	185376671	6.394844e-8	Acinetobacter bouvetii
HN_chr4_2462	HN	4	24610001	24620000	2	f_Vicinamibacteraceae(2)	Zm00001d049290	4-23190637	24612901	4.973475e-8	f_Vicinamibacteraceae
HN_chr8_4596	HN	8	45950001	45960000	1	f_Vicinamibacteraceae(1)		8-44710996	45954816	6.107445e-8	f_Vicinamibacteraceae
HN_chr8_4600	HN	8	45990001	46000000	1	f_Vicinamibacteraceae(1)		8-44680354	45996613	4.887233e-8	f_Vicinamibacteraceae
HN_chr4_20782	HN	4	207810001	207820000	1	Pajaroellobacter(1)		4-203544857	207813234	3.4943489999999995e-8	Pajaroellobacter
HN_chr1_633	HN	1	6320001	6330000	1	Herbaspirillum huttiense(1)	Zm00001d027485;Zm00001d027486;Zm00001d027487	1-6245989	6328518	1.173159e-8	Herbaspirillum huttiense
HN_chr1_28105	HN	1	281040001	281050000	1	Herbaspirillum huttiense(1)	Zm00001d034006;Zm00001d034007;Zm00001d034008	1-276189693	281044500	1.709322e-8	Herbaspirillum huttiense
HN_chr2_662	HN	2	6610001	6620000	1	Herbaspirillum huttiense(1)		2-6703113	6619730	1.11649e-8	Herbaspirillum huttiense
HN_chr3_216	HN	3	2150001	2160000	1	Herbaspirillum huttiense(1)	Zm00001d039342	3-2916073	2152752	5.423922e-8	Herbaspirillum huttiense
HN_chr4_15954	HN	4	159530001	159540000	1	Herbaspirillum huttiense(1)	Zm00001d051461	4-156038977	159530934	5.644379e-8	Herbaspirillum huttiense
HN_chr4_23518	HN	4	235170001	235180000	1	Herbaspirillum huttiense(1)		4-230675356	235171433	1.975416e-9	Herbaspirillum huttiense
HN_chr5_1862	HN	5	18610001	18620000	1	Herbaspirillum huttiense(1)	Zm00001d013724	5-18177829	18617648	5.636432e-9	Herbaspirillum huttiense
HN_chr5_6863	HN	5	68620001	68630000	1	Herbaspirillum huttiense(1)		5-66739630	68625420	5.743631999999999e-9	Herbaspirillum huttiense
HN_chr6_10586	HN	6	105850001	105860000	1	Herbaspirillum huttiense(1)	Zm00001d036894;Zm00001d036895;Zm00001d036896	6-102768271	105851220	1.430263e-9	Herbaspirillum huttiense
HN_chr10_13065	HN	10	130640001	130650000	1	Sphingomonas azotifigens-paucimobilis-leidyi(1)		10-129503066	130641771	1.571619e-9	Sphingomonas azotifigens-paucimobilis-leidyi
HN_chr5_19163	HN	5	191620001	191630000	1	Oryzihumus terrae(1)	Zm00001d017281;Zm00001d017282	5-186879093	191621782	6.180297e-8	Oryzihumus terrae
HN_chr4_14162	HN	4	141610001	141620000	1	Rhizobium phaseoli-multihospitium-favelukesii(1)	Zm00001d051088	4-138483623	141611032	5.207642e-8	Rhizobium phaseoli-multihospitium-favelukesii
HN_chr7_1106	HN	7	11050001	11060000	1	Sphingomonas limnosediminicola(1)	Zm00001d018968;Zm00001d018969;Zm00001d018970	7-10780255	11057111	4.809555000000001e-8	Sphingomonas limnosediminicola
HN_chr1_949	HN	1	9480001	9490000	1	Salmonella bongori(1)	Zm00001d027628;Zm00001d027630;Zm00001d027631	1-9427598	9487532	4.108602e-8	Salmonella bongori
HN_chr1_1959	HN	1	19580001	19590000	1	Salmonella bongori(1)	Zm00001d027991;Zm00001d027992	1-19252662	19586905	5.6895739999999985e-8	Salmonella bongori
HN_chr1_12655	HN	1	126540001	126550000	1	Salmonella bongori(1)		1-124580203	126544132	3.5294910000000004e-8	Salmonella bongori
HN_chr1_12690	HN	1	126890001	126900000	1	Salmonella bongori(1)		1-124918196	126894053	1.7868700000000003e-8	Salmonella bongori
HN_chr1_12974	HN	1	129730001	129740000	1	Salmonella bongori(1)	Zm00001d030401	1-127399608	129736558	3.123886e-8	Salmonella bongori
HN_chr1_20329	HN	1	203280001	203290000	1	Salmonella bongori(1)		1-200809443	203285801	1.710628e-10	Salmonella bongori
HN_chr1_20423	HN	1	204220001	204230000	1	Salmonella bongori(1)	Zm00001d031854	1-201751517	204223181	4.480075000000001e-8	Salmonella bongori
HN_chr1_30331	HN	1	303300001	303310000	1	Salmonella bongori(1)	Zm00001d034833	1-297889089	303302112	1.419854e-9	Salmonella bongori
HN_chr1_30356	HN	1	303550001	303560000	1	Salmonella bongori(1)		1-298135560	303556390	2.701392e-8	Salmonella bongori
HN_chr1_30454	HN	1	304530001	304540000	1	Salmonella bongori(1)	Zm00001d034877;Zm00001d034878	1-299070968	304533439	4.74152e-8	Salmonella bongori
HN_chr2_1862	HN	2	18610001	18620000	1	Salmonella bongori(1)		2-18022049	18613974	1.2001620000000002e-8	Salmonella bongori
HN_chr3_555	HN	3	5540001	5550000	1	Salmonella bongori(1)		3-6376333	5543634	1.261126e-9	Salmonella bongori
HN_chr3_2498	HN	3	24970001	24980000	1	Salmonella bongori(1)		3-25458961	24973813	3.185789e-8	Salmonella bongori
HN_chr3_12256	HN	3	122550001	122560000	2	Salmonella bongori(2)		3-122221952	122556299	4.935105e-8	Salmonella bongori
HN_chr3_15415	HN	3	154140001	154150000	1	Salmonella bongori(1)		3-152782912	154148422	1.204757e-8	Salmonella bongori
HN_chr4_24588	HN	4	245870001	245880000	1	Salmonella bongori(1)	Zm00001d054070	4-240897262	245878642	2.881937e-8	Salmonella bongori
HN_chr5_124	HN	5	1230001	1240000	1	Salmonella bongori(1)	Zm00001d012859;Zm00001d012860	5-1198858	1238066	8.449996999999999e-9	Salmonella bongori
HN_chr5_3319	HN	5	33180001	33190000	1	Salmonella bongori(1)	Zm00001d014122	5-32040337	33187432	4.888205e-9	Salmonella bongori
HN_chr5_4863	HN	5	48620001	48630000	1	Salmonella bongori(1)	Zm00001d014464	5-47156231	48627143	2.753834000000001e-9	Salmonella bongori
HN_chr5_4865	HN	5	48640001	48650000	1	Salmonella bongori(1)		5-47169848	48647874	5.0743019999999986e-8	Salmonella bongori
HN_chr5_4866	HN	5	48650001	48660000	5	Salmonella bongori(5)		5-47178721	48656747	6.131764000000001e-9	Salmonella bongori
HN_chr5_4867	HN	5	48660001	48670000	2	Salmonella bongori(2)		5-47184201	48662226	5.122653e-8	Salmonella bongori
HN_chr5_4869	HN	5	48680001	48690000	1	Salmonella bongori(1)		5-47209165	48687473	3.173477e-8	Salmonella bongori
HN_chr5_4873	HN	5	48720001	48730000	1	Salmonella bongori(1)		5-47239838	48722669	4.102132e-8	Salmonella bongori
HN_chr5_4893	HN	5	48920001	48930000	1	Salmonella bongori(1)		5-47355931	48926258	2.795013e-8	Salmonella bongori
HN_chr5_4910	HN	5	49090001	49100000	1	Salmonella bongori(1)		5-47583796	49090816	6.6512789999999985e-12	Salmonella bongori
HN_chr6_16265	HN	6	162640001	162650000	1	Salmonella bongori(1)	Zm00001d038692;Zm00001d038693;Zm00001d038694;Zm00001d038695	6-158686980	162644852	5.851527e-8	Salmonella bongori
HN_chr7_16357	HN	7	163560001	163570000	1	Salmonella bongori(1)	Zm00001d021815;Zm00001d021816;Zm00001d021817	7-158194779	163563186	2.461151e-8	Salmonella bongori
HN_chr7_17935	HN	7	179340001	179350000	4	Salmonella bongori(4)	Zm00001d022524;Zm00001d022525;Zm00001d022526;Zm00001d022527	7-173854908	179343599	1.445198e-8	Salmonella bongori
HN_chr8_2288	HN	8	22870001	22880000	1	Salmonella bongori(1)	Zm00001d008858;Zm00001d008859	8-22193338	22878001	6.852188e-9	Salmonella bongori
HN_chr8_8153	HN	8	81520001	81530000	1	Salmonella bongori(1)		8-79500967	81524556	1.43101e-9	Salmonella bongori
HN_chr8_10664	HN	8	106630001	106640000	1	Salmonella bongori(1)		8-103878102	106639764	4.528867e-8	Salmonella bongori
HN_chr8_11798	HN	8	117970001	117980000	1	Salmonella bongori(1)		8-114729747	117973768	4.305943e-8	Salmonella bongori
HN_chr8_14219	HN	8	142180001	142190000	1	Salmonella bongori(1)		8-137641875	142182163	8.875319e-9	Salmonella bongori
HN_chr8_14296	HN	8	142950001	142960000	1	Salmonella bongori(1)		8-138352262	142955459	1.19104e-8	Salmonella bongori
HN_chr9_9805	HN	9	98040001	98050000	1	Salmonella bongori(1)		9-95644122	98047936	5.143851e-8	Salmonella bongori
HN_chr9_9807	HN	9	98060001	98070000	1	Salmonella bongori(1)		9-95658762	98062575	1.790714e-9	Salmonella bongori
HN_chr10_351	HN	10	3500001	3510000	1	Salmonella bongori(1)	Zm00001d023329	10-3906610	3503827	2.228009e-11	Salmonella bongori
HN_chr10_7721	HN	10	77200001	77210000	1	Salmonella bongori(1)		10-77817609	77208502	2.574881e-8	Salmonella bongori
HN_chr10_7878	HN	10	78770001	78780000	1	Salmonella bongori(1)		10-79359156	78773241	2.5809360000000004e-9	Salmonella bongori
HN_chr10_7982	HN	10	79810001	79820000	1	Salmonella bongori(1)	Zm00001d024595	10-80406712	79818129	3.055396e-8	Salmonella bongori
HN_chr10_12228	HN	10	122270001	122280000	1	Salmonella bongori(1)		10-121204682	122273294	1.118045e-9	Salmonella bongori
HN_chr1_3538	HN	1	35370001	35380000	1	Archangium gephyra(1)	Zm00001d028452	1-36348065	35377134	4.333213e-8	Archangium gephyra
HN_chr1_15913	HN	1	159120001	159130000	1	Archangium gephyra(1)	Zm00001d030774;Zm00001d030775	1-157255032	159128348	1.60097e-8	Archangium gephyra
HN_chr3_11594	HN	3	115930001	115940000	1	Archangium gephyra(1)		3-115630905	115937175	1.918718e-8	Archangium gephyra
HN_chr3_11721	HN	3	117200001	117210000	1	Archangium gephyra(1)	Zm00001d041403;Zm00001d041404	3-116918548	117208808	2.475182e-8	Archangium gephyra
HN_chr3_11735	HN	3	117340001	117350000	1	Archangium gephyra(1)		3-117057183	117345605	5.602683e-8	Archangium gephyra
HN_chr3_11736	HN	3	117350001	117360000	1	Archangium gephyra(1)		3-117063613	117352034	5.359874e-8	Archangium gephyra
HN_chr3_11740	HN	3	117390001	117400000	1	Archangium gephyra(1)	Zm00001d041406;Zm00001d041407	3-117109825	117398279	1.904924e-9	Archangium gephyra
HN_chr3_11741	HN	3	117400001	117410000	1	Archangium gephyra(1)	Zm00001d041407	3-117117517	117405971	5.417198e-8	Archangium gephyra
HN_chr3_11742	HN	3	117410001	117420000	1	Archangium gephyra(1)		3-117127585	117416039	6.485658e-8	Archangium gephyra
HN_chr3_11744	HN	3	117430001	117440000	2	Archangium gephyra(2)		3-117145479	117433933	5.360831e-8	Archangium gephyra
HN_chr3_11750	HN	3	117490001	117500000	1	Archangium gephyra(1)		3-117203706	117491815	2.56643e-8	Archangium gephyra
HN_chr3_11756	HN	3	117550001	117560000	1	Archangium gephyra(1)		3-117264594	117552304	1.7545419999999998e-8	Archangium gephyra
HN_chr3_11759	HN	3	117580001	117590000	1	Archangium gephyra(1)	Zm00001d041410	3-117280298	117583899	5.6789140000000015e-9	Archangium gephyra
HN_chr3_11768	HN	3	117670001	117680000	1	Archangium gephyra(1)		3-117350335	117677085	6.33962e-8	Archangium gephyra
HN_chr3_11769	HN	3	117680001	117690000	1	Archangium gephyra(1)		3-117378485	117685379	3.104547e-8	Archangium gephyra
HN_chr3_11771	HN	3	117700001	117710000	1	Archangium gephyra(1)		3-117397537	117704430	1.8308830000000004e-8	Archangium gephyra
HN_chr3_11774	HN	3	117730001	117740000	1	Archangium gephyra(1)		3-117483167	117730570	5.935796e-8	Archangium gephyra
HN_chr3_11775	HN	3	117740001	117750000	2	Archangium gephyra(2)		3-117466176	117747550	4.153427e-8	Archangium gephyra
HN_chr4_19797	HN	4	197960001	197970000	1	Archangium gephyra(1)		4-193753801	197962053	1.083626e-8	Archangium gephyra
HN_chr10_7223	HN	10	72220001	72230000	1	Archangium gephyra(1)	Zm00001d024467;Zm00001d024468	10-73146773	72226240	1.138516e-8	Archangium gephyra
HN_chr7_14475	HN	7	144740001	144750000	1	Galbitalea(1)	Zm00001d021168	7-140047352	144746380	1.031953e-8	Galbitalea
HN_chr1_26681	HN	1	266800001	266810000	1	Variovorax soli(1)		1-262007260	266806716	2.437873e-8	Variovorax soli
HN_chr2_21645	HN	2	216440001	216450000	1	Variovorax soli(1)	Zm00001d006776;Zm00001d006777;Zm00001d006778	2-210249435	216441890	4.105764e-8	Variovorax soli
HN_chr2_23929	HN	2	239280001	239290000	1	Variovorax soli(1)	Zm00001d007766;Zm00001d007767;Zm00001d007768;Zm00001d007769;Zm00001d007770;Zm00001d007771	2-233052912	239286313	4.923833e-8	Variovorax soli
HN_chr3_13068	HN	3	130670001	130680000	1	Variovorax soli(1)		3-130172471	130675057	1.389e-8	Variovorax soli
HN_chr6_16681	HN	6	166800001	166810000	2	Variovorax soli(2)	Zm00001d038908;Zm00001d038909	6-162797896	166806472	3.656223e-8	Variovorax soli
HN_chr6_16969	HN	6	169680001	169690000	1	Variovorax soli(1)	Zm00001d039078;Zm00001d039079;Zm00001d039080;Zm00001d039081	6-165733856	169685001	5.909706e-8	Variovorax soli
HN_chr8_10609	HN	8	106080001	106090000	1	Variovorax soli(1)		8-103400161	106083337	4.672885e-8	Variovorax soli
HN_chr8_17351	HN	8	173500001	173510000	1	Variovorax soli(1)	Zm00001d012393	8-167811405	173509913	7.298331e-9	Variovorax soli
HN_chr10_2015	HN	10	20140001	20150000	1	Variovorax soli(1)		10-19724807	20142161	2.200597e-8	Variovorax soli
HN_chr1_6698	HN	1	66970001	66980000	1	Arenimonas(1)		1-66655138	66970509	4.227196e-8	Arenimonas
HN_chr3_9689	HN	3	96880001	96890000	1	Arenimonas(1)		3-110971559	96888414	9.942579e-9	Arenimonas
HN_chr1_126	HN	1	1250001	1260000	1	Ellin6067(1)		1-1216319	1251192	4.518536e-8	Ellin6067
HN_chr5_3311	HN	5	33100001	33110000	1	Ellin6067(1)	Zm00001d014121	5-31972558	33108963	3.7545050000000006e-8	Ellin6067
HN_chr5_17582	HN	5	175810001	175820000	1	Ellin6067(1)		5-171770550	175812323	5.202621e-8	Ellin6067
HN_chr5_17595	HN	5	175940001	175950000	1	Ellin6067(1)	Zm00001d016786	5-171905365	175944436	1.944012e-8	Ellin6067
HN_chr6_16779	HN	6	167780001	167790000	1	Ellin6067(1)		6-163783334	167789051	1.949403e-8	Ellin6067
HN_chr9_2953	HN	9	29520001	29530000	1	Ellin6067(1)	Zm00001d045632	9-29402916	29524494	2.336667e-8	Ellin6067
HN_chr10_518	HN	10	5170001	5180000	1	Ellin6067(1)	Zm00001d023423;Zm00001d023424	10-5530495	5176573	6.435165000000002e-8	Ellin6067
HN_chr5_5828	HN	5	58270001	58280000	1	Bradyrhizobium elkanii(1)	Zm00001d014670	5-56497763	58272088	5.23829e-8	Bradyrhizobium elkanii
HN_chr4_14791	HN	4	147900001	147910000	1	Mucilaginibacter gossypii(1)		4-144615989	147907464	5.976722e-8	Mucilaginibacter gossypii
HN_chr8_17268	HN	8	172670001	172680000	1	Mucilaginibacter gossypii(1)		8-166983383	172678499	7.3197869999999995e-9	Mucilaginibacter gossypii
HN_chr3_14664	HN	3	146630001	146640000	1	Pseudoduganella(1)		3-145563487	146638297	1.4281989999999996e-9	Pseudoduganella
HN_chr4_8040	HN	4	80390001	80400000	1	Chryseobacterium indologenes(1)		4-77604630	80394130	1.879984e-8	Chryseobacterium indologenes
HN_chr4_8042	HN	4	80410001	80420000	1	Chryseobacterium indologenes(1)		4-77621133	80417175	4.336272e-8	Chryseobacterium indologenes
HN_chr4_8669	HN	4	86680001	86690000	2	Chryseobacterium indologenes(2)	Zm00001d050412	4-83646766	86689767	1.241599e-8	Chryseobacterium indologenes
HN_chr4_8670	HN	4	86690001	86700000	1	Chryseobacterium indologenes(1)	Zm00001d050412;Zm00001d050413	4-83650384	86693385	6.346039e-8	Chryseobacterium indologenes
HN_chr4_14572	HN	4	145710001	145720000	1	Chryseobacterium indologenes(1)	Zm00001d051143	4-142426247	145717799	2.975722e-8	Chryseobacterium indologenes
HN_chr4_14575	HN	4	145740001	145750000	1	Chryseobacterium indologenes(1)		4-142449423	145740972	1.108507e-8	Chryseobacterium indologenes
HN_chr4_14576	HN	4	145750001	145760000	2	Chryseobacterium indologenes(2)		4-142463260	145754929	1.409929e-8	Chryseobacterium indologenes
HN_chr4_14578	HN	4	145770001	145780000	2	Chryseobacterium indologenes(2)	Zm00001d051145	4-142485601	145777269	2.972732e-8	Chryseobacterium indologenes
HN_chr4_14583	HN	4	145820001	145830000	1	Chryseobacterium indologenes(1)	Zm00001d051147	4-142538150	145829818	5.075262e-8	Chryseobacterium indologenes
LN_chr5_8681	LN	5	86800001	86810000	1	Massilia putida(1)		5-84612247	86805895	3.2525630000000004e-8	Massilia putida
LN_chr5_8686	LN	5	86850001	86860000	1	Massilia putida(1)		5-84660850	86855588	4.394677e-8	Massilia putida
LN_chr5_8697	LN	5	86960001	86970000	1	Massilia putida(1)		5-84768296	86964080	3.055948e-8	Massilia putida
LN_chr5_14138	LN	5	141370001	141380000	1	Massilia putida(1)		5-138061932	141372175	4.565083e-8	Massilia putida
LN_chr3_14793	LN	3	147920001	147930000	1	Labrys miyagiensis(1)	Zm00001d042031;Zm00001d042033	3-146815323	147920139	4.740017e-8	Labrys miyagiensis
LN_chr1_29341	LN	1	293400001	293410000	2	Pseudomonas chlororaphis(2)	Zm00001d034452	1-288235484	293402088	3.610421e-9	Pseudomonas chlororaphis
LN_chr2_6108	LN	2	61070001	61080000	1	Pseudomonas chlororaphis(1)		2-59544559	61075690	1.081028e-8	Pseudomonas chlororaphis
LN_chr10_9671	LN	10	96700001	96710000	1	Pseudomonas chlororaphis(1)		10-96460432	96707110	4.567906e-9	Pseudomonas chlororaphis
LN_chr5_19671	LN	5	196700001	196710000	1	Kribbella karoonensis(1)		5-191386855	196705041	4.5544540000000006e-9	Kribbella karoonensis
LN_chr2_3142	LN	2	31410001	31420000	1	Terriglobus(1)		2-30600221	31418594	5.366274e-9	Terriglobus
LN_chr1_23319	LN	1	233180001	233190000	1	Duganella radicis(1)		1-229725745	233188735	6.667426e-9	Duganella radicis
LN_chr7_11340	LN	7	113390001	113400000	1	Duganella radicis(1)		7-110282311	113398501	6.084382e-11	Duganella radicis
LN_chr8_17415	LN	8	174140001	174150000	3	Duganella radicis(3)	Zm00001d012414;Zm00001d012415	8-168462433	174141312	5.244394e-9	Duganella radicis
LN_chr2_550	LN	2	5490001	5500000	1	Pseudomonas umsongensis(1)	Zm00001d002079;Zm00001d002080	2-5556811	5493069	1.999518e-8	Pseudomonas umsongensis
LN_chr3_21164	LN	3	211630001	211640000	1	Pseudomonas umsongensis(1)	Zm00001d043842;Zm00001d043843;Zm00001d043844	3-208154375	211630442	5.40967e-8	Pseudomonas umsongensis
LN_chr6_10848	LN	6	108470001	108480000	1	Pseudomonas umsongensis(1)	Zm00001d036990;Zm00001d036991	6-105293310	108476082	5.947206e-8	Pseudomonas umsongensis
LN_chr6_10854	LN	6	108530001	108540000	1	Pseudomonas umsongensis(1)	Zm00001d036994	6-105354436	108537479	2.065817e-10	Pseudomonas umsongensis
LN_chr9_11136	LN	9	111350001	111360000	1	Pseudomonas umsongensis(1)	Zm00001d046929	9-108739722	111352052	1.449663e-8	Pseudomonas umsongensis
LN_chr3_1400	LN	3	13990001	14000000	1	f_Comamonadaceae Unknown Genus(1)		3-14724767	13991317	5.893301e-8	f_Comamonadaceae Unknown Genus
LN_chr3_1402	LN	3	14010001	14020000	1	f_Comamonadaceae Unknown Genus(1)		3-14756081	14012230	3.318775e-8	f_Comamonadaceae Unknown Genus
LN_chr3_1409	LN	3	14080001	14090000	1	f_Comamonadaceae Unknown Genus(1)	Zm00001d039757	3-14816053	14088561	5.331990000000001e-8	f_Comamonadaceae Unknown Genus
LN_chr3_1414	LN	3	14130001	14140000	1	f_Comamonadaceae Unknown Genus(1)	Zm00001d039758;Zm00001d039761;Zm00001d039762;Zm00001d039763	3-14863142	14135705	5.175975e-8	f_Comamonadaceae Unknown Genus
LN_chr5_22060	LN	5	220590001	220600000	1	f_Comamonadaceae Unknown Genus(1)	Zm00001d018428;Zm00001d018429;Zm00001d018430	5-214769539	220592983	4.96232e-8	f_Comamonadaceae Unknown Genus
LN_chr10_2396	LN	10	23950001	23960000	2	f_Comamonadaceae Unknown Genus(2)		10-23456596	23954233	6.746922e-9	f_Comamonadaceae Unknown Genus
LN_chr1_26509	LN	1	265080001	265090000	1	Stenotrophomonas tumulicola(1)	Zm00001d033510	1-260563854	265081296	6.0657900000000004e-09	Stenotrophomonas tumulicola
LN_chr3_1335	LN	3	13340001	13350000	1	Achromobacter insolitus(1)		3-14054364	13345333	6.253045e-8	Achromobacter insolitus
LN_chr7_4520	LN	7	45190001	45200000	1	Burkholderia vietnamiensis(1)		7-43666701	45198954	2.591924e-8	Burkholderia vietnamiensis
LN_chr7_7537	LN	7	75360001	75370000	1	Burkholderia vietnamiensis(1)	Zm00001d019914	7-73014536	75366794	1.616415e-9	Burkholderia vietnamiensis
LN_chr1_10237	LN	1	102360001	102370000	1	Phenylobacterium muchangponense(1)	Zm00001d030053;Zm00001d030055;Zm00001d030056;Zm00001d030057	1-99999475	102360730	6.268867000000002e-8	Phenylobacterium muchangponense
LN_chr1_10350	LN	1	103490001	103500000	1	Phenylobacterium muchangponense(1)		1-101137945	103498748	3.926911e-8	Phenylobacterium muchangponense
LN_chr1_10359	LN	1	103580001	103590000	1	Phenylobacterium muchangponense(1)		1-101225376	103584056	4.039246e-8	Phenylobacterium muchangponense
LN_chr1_27733	LN	1	277320001	277330000	1	Amycolatopsis mediterranei(1)		1-272591848	277321711	1.414968e-8	Amycolatopsis mediterranei
LN_chr9_9320	LN	9	93190001	93200000	1	Amycolatopsis mediterranei(1)	Zm00001d046511	9-90842789	93199484	4.862273e-8	Amycolatopsis mediterranei
LN_chr9_9325	LN	9	93240001	93250000	1	Amycolatopsis mediterranei(1)		9-90896202	93249436	5.991788e-8	Amycolatopsis mediterranei
LN_chr9_9330	LN	9	93290001	93300000	1	Amycolatopsis mediterranei(1)		9-90937808	93291528	4.7843599999999986e-8	Amycolatopsis mediterranei
LN_chr10_12284	LN	10	122830001	122840000	1	Streptomyces sp 1(1)	Zm00001d025575;Zm00001d025576;Zm00001d025577	10-121748659	122832298	8.668033000000001e-9	Streptomyces sp 1
LN_chr6_12482	LN	6	124810001	124820000	4	Burkholderia sp 2(4);Burkholderia pseudomallei(4)	Zm00001d037409;Zm00001d037410;Zm00001d037411;Zm00001d037412	6-121027455	124813609	1.596567e-8	Burkholderia sp 2
LN_chr5_18848	LN	5	188470001	188480000	1	Steroidobacter(1)	Zm00001d017191;Zm00001d017192	5-183779458	188470211	5.067228e-8	Steroidobacter
LN_chr3_14150	LN	3	141490001	141500000	1	Ralstonia pickettii(1)		3-140770685	141498434	6.41528e-8	Ralstonia pickettii
LN_chr4_19511	LN	4	195100001	195110000	1	Ralstonia pickettii(1)		4-191085031	195100549	2.883671e-8	Ralstonia pickettii
LN_chr6_69	LN	6	680001	690000	1	Ralstonia pickettii(1)	Zm00001d034978	6-675297	682805	3.066153e-8	Ralstonia pickettii
LN_chr6_762	LN	6	7610001	7620000	1	Ralstonia pickettii(1)	Zm00001d035172	6-7241149	7618574	5.6206e-8	Ralstonia pickettii
LN_chr8_915	LN	8	9140001	9150000	1	Ralstonia pickettii(1)	Zm00001d008454	8-8811533	9144887	3.900051e-8	Ralstonia pickettii
LN_chr9_4767	LN	9	47660001	47670000	1	Ralstonia pickettii(1)		9-46769552	47664824	5.92317e-9	Ralstonia pickettii
LN_chr2_22719	LN	2	227180001	227190000	1	Nitrospira japonica(1)		2-221093966	227187447	1.375923e-8	Nitrospira japonica
LN_chr5_2256	LN	5	22550001	22560000	1	TM7a sp 2(1)		5-22062456	22550582	2.449584e-8	TM7a sp 2
LN_chr5_2266	LN	5	22650001	22660000	1	TM7a sp 2(1)		5-22166780	22655123	2.182674e-8	TM7a sp 2
LN_chr5_2269	LN	5	22680001	22690000	1	TM7a sp 2(1)		5-22193806	22682202	1.397733e-8	TM7a sp 2
LN_chr5_2271	LN	5	22700001	22710000	1	TM7a sp 2(1)	Zm00001d013850;Zm00001d013851;Zm00001d013852;Zm00001d013853	5-22216841	22706299	9.895001e-9	TM7a sp 2
LN_chr5_2272	LN	5	22710001	22720000	1	TM7a sp 2(1)	Zm00001d013850;Zm00001d013851;Zm00001d013852;Zm00001d013853;Zm00001d013854	5-22220852	22710307	3.116567e-8	TM7a sp 2
LN_chr5_2274	LN	5	22730001	22740000	2	TM7a sp 2(2)	Zm00001d013853;Zm00001d013854	5-22240786	22730240	3.5790370000000004e-8	TM7a sp 2
LN_chr5_2275	LN	5	22740001	22750000	4	TM7a sp 2(4)		5-22257066	22746524	8.997505e-10	TM7a sp 2
LN_chr5_2277	LN	5	22760001	22770000	1	TM7a sp 2(1)	Zm00001d013855	5-22281035	22768130	7.052785000000001e-9	TM7a sp 2
LN_chr5_2278	LN	5	22770001	22780000	2	TM7a sp 2(2)	Zm00001d013855	5-22290553	22777648	2.37592e-9	TM7a sp 2
LN_chr5_2282	LN	5	22810001	22820000	2	TM7a sp 2(2)	Zm00001d013856	5-22333047	22819247	1.6164559999999998e-8	TM7a sp 2
LN_chr5_2283	LN	5	22820001	22830000	1	TM7a sp 2(1)		5-22341340	22827540	5.852256999999999e-9	TM7a sp 2
LN_chr5_2285	LN	5	22840001	22850000	1	TM7a sp 2(1)	Zm00001d013857	5-22363797	22849997	1.905385e-8	TM7a sp 2
LN_chr5_2286	LN	5	22850001	22860000	1	TM7a sp 2(1)	Zm00001d013857;Zm00001d013858	5-22364112	22850312	1.130945e-8	TM7a sp 2
LN_chr5_2287	LN	5	22860001	22870000	5	TM7a sp 2(5)	Zm00001d013857;Zm00001d013858	5-22380552	22866764	3.382571e-9	TM7a sp 2
LN_chr5_2288	LN	5	22870001	22880000	3	TM7a sp 2(3)	Zm00001d013858	5-22390897	22877109	3.176515e-9	TM7a sp 2
LN_chr5_2289	LN	5	22880001	22890000	2	TM7a sp 2(2)		5-22396181	22882043	1.802586e-8	TM7a sp 2
LN_chr5_2292	LN	5	22910001	22920000	5	TM7a sp 2(5)		5-22414929	22917579	4.2752e-10	TM7a sp 2
LN_chr5_2294	LN	5	22930001	22940000	3	TM7a sp 2(3)		5-22436526	22936100	4.693343e-10	TM7a sp 2
LN_chr5_2295	LN	5	22940001	22950000	4	TM7a sp 2(4)		5-22408127	22945821	1.12648e-8	TM7a sp 2
LN_chr5_2296	LN	5	22950001	22960000	4	TM7a sp 2(4)		5-22444101	22952740	7.155001e-9	TM7a sp 2
LN_chr5_2297	LN	5	22960001	22970000	1	TM7a sp 2(1)		5-22448622	22964457	7.294054e-9	TM7a sp 2
LN_chr5_2298	LN	5	22970001	22980000	2	TM7a sp 2(2)		5-22453335	22970676	1.3792950000000004e-8	TM7a sp 2
LN_chr5_2299	LN	5	22980001	22990000	1	TM7a sp 2(1)		5-22467496	22983952	1.299068e-8	TM7a sp 2
LN_chr5_2300	LN	5	22990001	23000000	1	TM7a sp 2(1)		5-22479708	22997312	7.816389e-9	TM7a sp 2
LN_chr5_2301	LN	5	23000001	23010000	2	TM7a sp 2(2)		5-22491626	23008776	6.921731e-9	TM7a sp 2
LN_chr5_2302	LN	5	23010001	23020000	1	TM7a sp 2(1)		5-22493056	23010206	9.389911e-9	TM7a sp 2
LN_chr5_2303	LN	5	23020001	23030000	2	TM7a sp 2(2)		5-22508450	23025515	1.299068e-8	TM7a sp 2
LN_chr5_2304	LN	5	23030001	23040000	3	TM7a sp 2(3)		5-22520460	23038059	1.299068e-8	TM7a sp 2
LN_chr5_2305	LN	5	23040001	23050000	2	TM7a sp 2(2)		5-22530169	23047882	4.623421e-9	TM7a sp 2
LN_chr5_2307	LN	5	23060001	23070000	3	TM7a sp 2(3)		5-22549855	23067566	1.7613120000000002e-9	TM7a sp 2
LN_chr5_2308	LN	5	23070001	23080000	3	TM7a sp 2(3)	Zm00001d013859	5-22562129	23078964	1.269788e-8	TM7a sp 2
LN_chr5_2310	LN	5	23090001	23100000	1	TM7a sp 2(1)	Zm00001d013859	5-22581630	23098405	1.290252e-8	TM7a sp 2
LN_chr5_2312	LN	5	23110001	23120000	1	TM7a sp 2(1)		5-22602332	23119027	3.4697290000000007e-9	TM7a sp 2
LN_chr5_2313	LN	5	23120001	23130000	2	TM7a sp 2(2)	Zm00001d013860	5-22604508	23121203	6.549098000000001e-9	TM7a sp 2
LN_chr5_2314	LN	5	23130001	23140000	3	TM7a sp 2(3)	Zm00001d013860	5-22622996	23139690	1.037425e-8	TM7a sp 2
LN_chr5_2315	LN	5	23140001	23150000	1	TM7a sp 2(1)	Zm00001d013860;Zm00001d013861	5-22623837	23140531	2.293315e-8	TM7a sp 2
LN_chr5_2316	LN	5	23150001	23160000	16	TM7a sp 2(16)	Zm00001d013860;Zm00001d013861	5-22651222	23158479	6.716952e-9	TM7a sp 2
LN_chr5_2317	LN	5	23160001	23170000	21	TM7a sp 2(21)	Zm00001d013860;Zm00001d013861	5-22656429	23163686	4.0832870000000006e-9	TM7a sp 2
LN_chr5_2318	LN	5	23170001	23180000	1	TM7a sp 2(1)	Zm00001d013862	5-22671705	23176460	1.587935e-9	TM7a sp 2
LN_chr5_2320	LN	5	23190001	23200000	1	TM7a sp 2(1)	Zm00001d013862	5-22694249	23199137	1.299068e-8	TM7a sp 2
LN_chr5_2325	LN	5	23240001	23250000	1	TM7a sp 2(1)	Zm00001d013863	5-22753824	23244218	1.391678e-8	TM7a sp 2
LN_chr5_2416	LN	5	24150001	24160000	1	TM7a sp 2(1)		5-23657187	24154220	1.119767e-8	TM7a sp 2
LN_chr5_6085	LN	5	60840001	60850000	1	TM7a sp 2(1)	Zm00001d014726;Zm00001d014727;Zm00001d014728	5-59062608	60842479	6.108512999999999e-8	TM7a sp 2
LN_chr10_6653	LN	10	66520001	66530000	1	TM7a sp 2(1)		10-67318079	66529988	3.776198e-8	TM7a sp 2
LN_chr10_11422	LN	10	114210001	114220000	1	TM7a sp 2(1)		10-113345923	114217123	5.534589e-8	TM7a sp 2
LN_chr1_1272	LN	1	12710001	12720000	1	Filimonas sp 2(1)	Zm00001d027756;Zm00001d027757	1-12523946	12719601	2.2294900000000003e-8	Filimonas sp 2
LN_chr1_1274	LN	1	12730001	12740000	1	Filimonas sp 2(1)		1-12536339	12732735	2.9538450000000007e-8	Filimonas sp 2
LN_chr1_1278	LN	1	12770001	12780000	12	Filimonas sp 2(12)	Zm00001d027758	1-12578680	12776458	1.586245e-8	Filimonas sp 2
LN_chr1_1279	LN	1	12780001	12790000	6	Filimonas sp 2(6)	Zm00001d027758	1-12590133	12787909	1.18841e-8	Filimonas sp 2
LN_chr1_1280	LN	1	12790001	12800000	32	Filimonas sp 2(32)		1-12596324	12794130	7.298856e-9	Filimonas sp 2
LN_chr1_1281	LN	1	12800001	12810000	6	Filimonas sp 2(6)		1-12603520	12801326	1.388384e-8	Filimonas sp 2
LN_chr1_1282	LN	1	12810001	12820000	26	Filimonas sp 2(26)		1-12613698	12811504	1.968718e-9	Filimonas sp 2
LN_chr1_1285	LN	1	12840001	12850000	16	Filimonas sp 2(16)	Zm00001d027759	1-12653602	12842568	6.218466e-9	Filimonas sp 2
LN_chr1_21283	LN	1	212820001	212830000	1	Filimonas sp 2(1)	Zm00001d032100;Zm00001d032101	1-209834111	212820956	5.8864870000000016e-8	Filimonas sp 2
LN_chr1_21289	LN	1	212880001	212890000	2	Filimonas sp 2(2)		1-209892216	212880571	1.7302279999999998e-8	Filimonas sp 2
LN_chr1_21299	LN	1	212980001	212990000	1	Filimonas sp 2(1)		1-209994532	212982372	4.3890000000000005e-9	Filimonas sp 2
LN_chr1_21317	LN	1	213160001	213170000	2	Filimonas sp 2(2)	Zm00001d032107	1-210184794	213168664	6.395825e-9	Filimonas sp 2
LN_chr1_21325	LN	1	213240001	213250000	3	Filimonas sp 2(3)	Zm00001d032109	1-210263965	213247837	3.996575e-9	Filimonas sp 2
LN_chr1_21326	LN	1	213250001	213260000	1	Filimonas sp 2(1)	Zm00001d032109	1-210274366	213258238	5.374159e-8	Filimonas sp 2
LN_chr1_21333	LN	1	213320001	213330000	1	Filimonas sp 2(1)	Zm00001d032111	1-210419188	213325722	6.305951e-8	Filimonas sp 2
LN_chr5_3579	LN	5	35780001	35790000	11	Filimonas sp 2(11)	Zm00001d014191;Zm00001d014192	5-34631321	35786871	1.1700870000000002e-8	Filimonas sp 2
LN_chr5_3580	LN	5	35790001	35800000	6	Filimonas sp 2(6)	Zm00001d014192	5-34634734	35790284	2.419655e-8	Filimonas sp 2
LN_chr5_3583	LN	5	35820001	35830000	7	Filimonas sp 2(7)		5-34661001	35826139	2.950412e-8	Filimonas sp 2
LN_chr5_3584	LN	5	35830001	35840000	1	Filimonas sp 2(1)		5-34673045	35839817	3.3506940000000004e-8	Filimonas sp 2
LN_chr5_3585	LN	5	35840001	35850000	5	Filimonas sp 2(5)		5-34677809	35844579	3.040386e-8	Filimonas sp 2
LN_chr5_3592	LN	5	35910001	35920000	9	Filimonas sp 2(9)		5-34750493	35917283	2.732242e-8	Filimonas sp 2
LN_chr6_11326	LN	6	113250001	113260000	1	Filimonas sp 2(1)	Zm00001d037124	6-108760528	113250224	5.590837000000001e-8	Filimonas sp 2
LN_chr2_645	LN	2	6440001	6450000	1	Niabella yanshanensis(1)	Zm00001d002132;Zm00001d002133;Zm00001d002134;Zm00001d002135	2-6449943	6447120	2.396893e-10	Niabella yanshanensis
LN_chr3_2332	LN	3	23310001	23320000	1	Niabella yanshanensis(1)	Zm00001d040023	3-23850107	23315296	3.1103110000000006e-8	Niabella yanshanensis
LN_chr4_4168	LN	4	41670001	41680000	1	Niabella yanshanensis(1)		4-39953176	41677780	5.892574e-8	Niabella yanshanensis
LN_chr4_14141	LN	4	141400001	141410000	1	Niabella yanshanensis(1)		4-138276032	141404135	3.372624e-8	Niabella yanshanensis
LN_chr4_14240	LN	4	142390001	142400000	1	Niabella yanshanensis(1)		4-139244851	142395269	3.480229e-8	Niabella yanshanensis
LN_chr7_10700	LN	7	106990001	107000000	1	Niabella yanshanensis(1)		7-103748230	106993327	4.426759e-8	Niabella yanshanensis
LN_chr9_15545	LN	9	155440001	155450000	2	Niabella yanshanensis(2)	Zm00001d048392	9-152569359	155443528	6.59053e-9	Niabella yanshanensis
LN_chr8_14545	LN	8	145440001	145450000	1	Sphingobium herbicidovorans 1(1)	Zm00001d011274	8-140814150	145440621	4.514347e-8	Sphingobium herbicidovorans 1
LN_chr2_5178	LN	2	51770001	51780000	1	Pelomonas saccharophila(1)	Zm00001d003646	2-50098499	51774512	3.779712e-8	Pelomonas saccharophila
LN_chr4_14597	LN	4	145960001	145970000	1	Pelomonas saccharophila(1)	Zm00001d051149	4-142664960	145961238	4.249548e-8	Pelomonas saccharophila
LN_chr4_14599	LN	4	145980001	145990000	13	Pelomonas saccharophila(13)		4-142684306	145980844	1.971005e-8	Pelomonas saccharophila
LN_chr3_16872	LN	3	168710001	168720000	1	Massilia niabensis(1)	Zm00001d042470	3-166143789	168717711	5.221135e-9	Massilia niabensis
LN_chr1_27871	LN	1	278700001	278710000	1	Bryobacter(1)	Zm00001d033925;Zm00001d033926;Zm00001d033927	1-273933053	278705359	1.175808e-8	Bryobacter
LN_chr1_123	LN	1	1220001	1230000	1	Mesorhizobium huakuii(1)	Zm00001d027275;Zm00001d027276;Zm00001d027277	1-1169345	1221412	1.566755e-8	Mesorhizobium huakuii
LN_chr2_23310	LN	2	233090001	233100000	1	Flavobacterium anatoliense(1)		2-226737681	233092617	7.722861e-9	Flavobacterium anatoliense
LN_chr3_23391	LN	3	233900001	233910000	1	Flavobacterium anatoliense(1)		3-230045453	233908093	3.4178540000000003e-8	Flavobacterium anatoliense
LN_chr5_13585	LN	5	135840001	135850000	1	Flavobacterium anatoliense(1)		5-132507446	135841541	1.880613e-8	Flavobacterium anatoliense
LN_chr5_16298	LN	5	162970001	162980000	1	Flavobacterium anatoliense(1)	Zm00001d016455;Zm00001d016456	5-159248826	162971683	3.806397e-8	Flavobacterium anatoliense
LN_chr9_15081	LN	9	150800001	150810000	1	Flavobacterium anatoliense(1)	Zm00001d048143;Zm00001d048145	9-148046056	150804950	5.790324e-10	Flavobacterium anatoliense
LN_chr10_2344	LN	10	23430001	23440000	1	Flavobacterium anatoliense(1)	Zm00001d023820	10-22952860	23434890	3.9259180000000005e-8	Flavobacterium anatoliense
LN_chr1_26732	LN	1	267310001	267320000	6	Bacillus fumarioli(6)	Zm00001d033567;Zm00001d033568;Zm00001d033569	1-262565717	267319215	4.035249e-9	Bacillus fumarioli
LN_chr1_26733	LN	1	267320001	267330000	1	Bacillus fumarioli(1)	Zm00001d033567;Zm00001d033568;Zm00001d033569;Zm00001d033570	1-262567267	267320765	1.0825229999999998e-8	Bacillus fumarioli
LN_chr4_4341	LN	4	43400001	43410000	1	TM7a sp 1(1)	Zm00001d049759;Zm00001d049760	4-41708130	43405024	5.8870900000000014e-9	TM7a sp 1
LN_chr5_16913	LN	5	169120001	169130000	1	TM7a sp 1(1)		5-165277255	169120707	5.630233e-8	TM7a sp 1
LN_chr9_7449	LN	9	74480001	74490000	1	TM7a sp 1(1)		9-74511624	74485947	8.317486e-11	TM7a sp 1
LN_chr5_18854	LN	5	188530001	188540000	3	f_Chitinophagaceae Unknown Genus(3);f_Vicinamibacteraceae(3);Parafilimonas(3)		5-183842626	188530458	2.995973e-9	Parafilimonas
LN_chr6_8696	LN	6	86950001	86960000	1	f_Chitinophagaceae Unknown Genus(1)	Zm00001d036402;Zm00001d036403	6-83990807	86951962	4.154681e-8	f_Chitinophagaceae Unknown Genus
LN_chr6_15934	LN	6	159330001	159340000	2	f_Chitinophagaceae Unknown Genus(2)	Zm00001d038528	6-155388648	159330796	8.489585999999999e-9	f_Chitinophagaceae Unknown Genus
LN_chr7_5268	LN	7	52670001	52680000	1	f_Chitinophagaceae Unknown Genus(1)	Zm00001d019706	7-51048675	52673229	5.646704e-8	f_Chitinophagaceae Unknown Genus
LN_chr7_17124	LN	7	171230001	171240000	1	f_Sphingobacteriaceae Unknown Genus(1)	Zm00001d022147	7-165705610	171239380	3.89949e-8	f_Sphingobacteriaceae Unknown Genus
LN_chr1_280	LN	1	2790001	2800000	1	Delftia tsuruhatensis(1)	Zm00001d027312;Zm00001d027313;Zm00001d027314	1-2703374	2793733	2.953164e-8	Delftia tsuruhatensis
LN_chr1_21760	LN	1	217590001	217600000	1	Delftia tsuruhatensis(1)		1-214477012	217594350	4.5351970000000005e-9	Delftia tsuruhatensis
LN_chr3_5202	LN	3	52010001	52020000	1	Delftia tsuruhatensis(1)		3-52132655	52010851	1.791718e-8	Delftia tsuruhatensis
LN_chr6_9377	LN	6	93760001	93770000	1	Delftia tsuruhatensis(1)		6-91362360	93769769	4.638782e-8	Delftia tsuruhatensis
LN_chr7_13702	LN	7	137010001	137020000	1	Delftia tsuruhatensis(1)		7-132956108	137017528	3.161377e-8	Delftia tsuruhatensis
LN_chr8_3798	LN	8	37970001	37980000	1	Delftia tsuruhatensis(1)		8-36946974	37974096	7.775693e-9	Delftia tsuruhatensis
LN_chr10_1972	LN	10	19710001	19720000	1	Delftia tsuruhatensis(1)		10-19290103	19718914	6.477684e-9	Delftia tsuruhatensis
LN_chr10_2047	LN	10	20460001	20470000	1	Delftia tsuruhatensis(1)		10-20004840	20469362	1.1881059999999998e-8	Delftia tsuruhatensis
LN_chr10_2456	LN	10	24550001	24560000	1	Delftia tsuruhatensis(1)		10-23999042	24554783	5.3764129999999986e-8	Delftia tsuruhatensis
LN_chr10_2462	LN	10	24610001	24620000	1	Delftia tsuruhatensis(1)		10-24040366	24619851	1.608217e-8	Delftia tsuruhatensis
LN_chr10_2488	LN	10	24870001	24880000	1	Delftia tsuruhatensis(1)		10-24268731	24873539	4.845522e-8	Delftia tsuruhatensis
LN_chr10_7738	LN	10	77370001	77380000	1	Delftia tsuruhatensis(1)		10-77981254	77375751	4.0821750000000006e-8	Delftia tsuruhatensis
LN_chr10_14495	LN	10	144940001	144950000	1	Delftia tsuruhatensis(1)		10-143846647	144940473	6.335167e-8	Delftia tsuruhatensis
LN_chr7_2735	LN	7	27340001	27350000	1	Rhodoplanes(1)		7-26267911	27340324	2.882222e-8	Rhodoplanes
LN_chr7_6002	LN	7	60010001	60020000	2	Duganella zoogloeoides(2)		7-59231758	60015134	3.845583e-8	Duganella zoogloeoides
LN_chr3_11122	LN	3	111210001	111220000	1	Kitasatospora setae(1)	Zm00001d041305	3-88023424	111211514	4.420765e-8	Kitasatospora setae
LN_chr3_20053	LN	3	200520001	200530000	1	Kitasatospora setae(1)		3-197531530	200520205	1.492326e-8	Kitasatospora setae
LN_chr2_21465	LN	2	214640001	214650000	1	Ilumatobacter(1)		2-208467463	214648029	1.627845e-8	Ilumatobacter
LN_chr1_3655	LN	1	36540001	36550000	1	Pantoea ananatis(1)		1-35187255	36542752	3.570668e-8	Pantoea ananatis
LN_chr10_7820	LN	10	78190001	78200000	1	Chitinophaga ginsengihumi(1)	Zm00001d024558	10-78782676	78192704	3.009888e-8	Chitinophaga ginsengihumi
LN_chr1_3579	LN	1	35780001	35790000	1	Gemmatimonas(1)	Zm00001d028464	1-35921222	35788593	1.590186e-8	Gemmatimonas
LN_chr1_4074	LN	1	40730001	40740000	1	Gemmatimonas(1)		1-40379453	40735746	4.736354000000001e-8	Gemmatimonas
LN_chr3_16643	LN	3	166420001	166430000	1	Gemmatimonas(1)	Zm00001d042416	3-163800952	166426607	1.445534e-8	Gemmatimonas
LN_chr3_17856	LN	3	178550001	178560000	1	f_Nitrososphaeraceae Unknown Genus 2(1)	Zm00001d042737;Zm00001d042738;Zm00001d042739	3-176037136	178555185	3.602787e-8	f_Nitrososphaeraceae Unknown Genus 2
LN_chr6_2155	LN	6	21540001	21550000	1	f_Nitrososphaeraceae Unknown Genus 2(1)		6-23155309	21542094	6.10279e-9	f_Nitrososphaeraceae Unknown Genus 2
LN_chr7_14042	LN	7	140410001	140420000	1	f_Nitrososphaeraceae Unknown Genus 2(1)	Zm00001d021011	7-137644890	140413405	4.5617870000000005e-9	f_Nitrososphaeraceae Unknown Genus 2
LN_chr8_13979	LN	8	139780001	139790000	1	Dyadobacter fermentans 1(1)		8-135359199	139789792	2.488964e-8	Dyadobacter fermentans 1
LN_chr10_7553	LN	10	75520001	75530000	1	Chitinophaga filiformis(1)	Zm00001d024515	10-76179932	75523409	2.343032e-8	Chitinophaga filiformis
LN_chr1_21477	LN	1	214760001	214770000	1	Pseudonocardia(1)	Zm00001d032159	1-211761090	214764713	1.5697450000000003e-8	Pseudonocardia
LN_chr9_1344	LN	9	13430001	13440000	2	Sphingoaurantiacus(2)	Zm00001d045119;Zm00001d045120;Zm00001d045121;Zm00001d045122	9-13760634	13430915	1.274474e-8	Sphingoaurantiacus
LN_chr10_2940	LN	10	29390001	29400000	1	Sphingoaurantiacus(1)		10-28649988	29394962	2.730312e-8	Sphingoaurantiacus
LN_chr10_2942	LN	10	29410001	29420000	1	Sphingoaurantiacus(1)		10-28666468	29412197	3.093448e-8	Sphingoaurantiacus
LN_chr10_2943	LN	10	29420001	29430000	1	Sphingoaurantiacus(1)		10-28678946	29424761	3.43877e-8	Sphingoaurantiacus
LN_chr10_2946	LN	10	29450001	29460000	1	Sphingoaurantiacus(1)		10-28725134	29457958	9.998502e-9	Sphingoaurantiacus
LN_chr10_2947	LN	10	29460001	29470000	2	Sphingoaurantiacus(2)		10-28733799	29465447	1.536745e-8	Sphingoaurantiacus
LN_chr8_18024	LN	8	180230001	180240000	1	Knoellia-Lapillicoccus(1)	Zm00001d012763	8-174516636	180234663	4.2134769999999986e-8	Knoellia-Lapillicoccus
LN_chr8_18058	LN	8	180570001	180580000	1	Knoellia-Lapillicoccus(1)	Zm00001d012772	8-174853196	180576539	5.484811e-8	Knoellia-Lapillicoccus
LN_chr9_14720	LN	9	147190001	147200000	1	Knoellia-Lapillicoccus(1)	Zm00001d047985	9-144631539	147191982	5.179309e-8	Knoellia-Lapillicoccus
LN_chr1_623	LN	1	6220001	6230000	1	Chitinophaga polysaccharea(1)	Zm00001d027477;Zm00001d027478	1-6136548	6226065	6.515090999999999e-9	Chitinophaga polysaccharea
LN_chr1_19339	LN	1	193380001	193390000	1	Chitinophaga polysaccharea(1)		1-191165975	193385887	6.317813000000002e-8	Chitinophaga polysaccharea
LN_chr4_15912	LN	4	159110001	159120000	1	Chitinophaga polysaccharea(1)	Zm00001d051451;Zm00001d051452	4-155637982	159111844	3.143027e-10	Chitinophaga polysaccharea
LN_chr5_6914	LN	5	69130001	69140000	1	Chitinophaga polysaccharea(1)	Zm00001d014940	5-67237242	69133538	2.053111e-8	Chitinophaga polysaccharea
LN_chr8_15467	LN	8	154660001	154670000	1	Chitinophaga polysaccharea(1)		8-149627827	154666236	7.383651999999998e-9	Chitinophaga polysaccharea
LN_chr8_16602	LN	8	166010001	166020000	8	Chitinophaga polysaccharea(8)	Zm00001d011988;Zm00001d011989;Zm00001d011990;Zm00001d011991;Zm00001d011992	8-160608548	166010386	1.435126e-8	Chitinophaga polysaccharea
LN_chr10_6872	LN	10	68710001	68720000	1	Chitinophaga polysaccharea(1)	Zm00001d024395	10-69589591	68716755	3.5508349999999995e-8	Chitinophaga polysaccharea
LN_chr10_13579	LN	10	135780001	135790000	1	Chitinophaga polysaccharea(1)		10-134558860	135784268	9.161385e-9	Chitinophaga polysaccharea
LN_chr3_8791	LN	3	87900001	87910000	2	Bacillus aryabhattai(2)	Zm00001d040980;Zm00001d040981	3-101966202	87902355	1.880683e-8	Bacillus aryabhattai
LN_chr3_9986	LN	3	99850001	99860000	1	Bacillus aryabhattai(1)		3-99224677	99850216	3.750029e-8	Bacillus aryabhattai
LN_chr3_10024	LN	3	100230001	100240000	1	Bacillus aryabhattai(1)	Zm00001d041142	3-98824387	100230042	6.102756e-8	Bacillus aryabhattai
LN_chr3_10088	LN	3	100870001	100880000	1	Bacillus aryabhattai(1)	Zm00001d041160	3-98205318	100873290	5.821632e-8	Bacillus aryabhattai
LN_chr9_11394	LN	9	113930001	113940000	1	Pseudarthrobacter(1)		9-111021126	113939811	6.086434e-8	Pseudarthrobacter
LN_chr3_4330	LN	3	43290001	43300000	1	f_Vicinamibacteraceae(1)		3-43835795	43292031	4.89954e-8	f_Vicinamibacteraceae
LN_chr6_7830	LN	6	78290001	78300000	1	f_Vicinamibacteraceae(1)		6-75600036	78296985	3.858877e-8	f_Vicinamibacteraceae
LN_chr6_7841	LN	6	78400001	78410000	1	f_Vicinamibacteraceae(1)		6-75707939	78407739	3.033839e-8	f_Vicinamibacteraceae
LN_chr1_15033	LN	1	150320001	150330000	1	Herbaspirillum huttiense(1)		1-148497952	150328846	3.9883660000000006e-8	Herbaspirillum huttiense
LN_chr4_15435	LN	4	154340001	154350000	1	Herbaspirillum huttiense(1)		4-150872082	154348005	1.920112e-8	Herbaspirillum huttiense
LN_chr5_3712	LN	5	37110001	37120000	1	Oryzihumus terrae(1)		5-35889394	37111604	1.668102e-8	Oryzihumus terrae
LN_chr2_20041	LN	2	200400001	200410000	1	Rhizobium phaseoli-multihospitium-favelukesii(1)	Zm00001d006169;Zm00001d006170	2-195135372	200403052	2.249214e-8	Rhizobium phaseoli-multihospitium-favelukesii
LN_chr3_15264	LN	3	152630001	152640000	1	Burkholderia insecticola(1)		3-151257740	152633295	4.489325e-8	Burkholderia insecticola
LN_chr5_9388	LN	5	93870001	93880000	1	Burkholderia insecticola(1)		5-91563483	93876683	4.325597e-8	Burkholderia insecticola
LN_chr3_16263	LN	3	162620001	162630000	1	Salmonella bongori(1)		3-161064245	162627048	4.793384e-8	Salmonella bongori
LN_chr3_17810	LN	3	178090001	178100000	1	Salmonella bongori(1)	Zm00001d042714;Zm00001d042716;Zm00001d042717	3-175578612	178093120	1.175802e-8	Salmonella bongori
LN_chr8_16614	LN	8	166130001	166140000	1	Salmonella bongori(1)	Zm00001d011999	8-160714445	166132273	4.598955e-8	Salmonella bongori
LN_chr10_5719	LN	10	57180001	57190000	1	Salmonella bongori(1)		10-56315037	57184959	3.3527370000000005e-8	Salmonella bongori
LN_chr6_10801	LN	6	108000001	108010000	1	Ellin6067(1)		6-104822311	108008828	4.401443e-8	Ellin6067
LN_chr6_10802	LN	6	108010001	108020000	1	Ellin6067(1)	Zm00001d036972	6-104823566	108010083	6.097448e-8	Ellin6067
LN_chr6_10803	LN	6	108020001	108030000	1	Ellin6067(1)	Zm00001d036972;Zm00001d036973	6-104843263	108029780	4.4393269999999986e-8	Ellin6067
LN_chr1_20352	LN	1	203510001	203520000	1	Sphingobium herbicidovorans 2(1)		1-201058942	203518198	5.7918e-8	Sphingobium herbicidovorans 2
LN_chr5_17559	LN	5	175580001	175590000	1	Bradyrhizobium elkanii(1)	Zm00001d016773	5-171583223	175588813	4.372208000000001e-8	Bradyrhizobium elkanii
LN_chr7_13021	LN	7	130200001	130210000	1	Catenulispora acidiphila(1)		7-126300601	130209740	2.077188e-8	Catenulispora acidiphila
LN_chr9_6779	LN	9	67780001	67790000	1	Catenulispora acidiphila(1)		9-63205035	67788635	2.716338e-8	Catenulispora acidiphila
LN_chr5_6253	LN	5	62520001	62530000	1	Mucilaginibacter gossypii(1)	Zm00001d014770	5-60718897	62527319	3.603515e-8	Mucilaginibacter gossypii
LN_chr9_5281	LN	9	52800001	52810000	1	Mucilaginibacter gossypii(1)	Zm00001d045988	9-51774287	52806471	8.074354999999999e-9	Mucilaginibacter gossypii
LN_chr4_14946	LN	4	149450001	149460000	1	Pseudoduganella(1)		4-146125554	149458712	3.263476e-8	Pseudoduganella
LN_chr4_21433	LN	4	214320001	214330000	1	Pseudoduganella(1)	Zm00001d053113;Zm00001d053114	4-211047592	214326777	1.82426e-8	Pseudoduganella
LN_chr4_21409	LN	4	214080001	214090000	1	Niastella(1)		4-210823516	214088210	1.653196e-8	Niastella
LN_chr4_21406	LN	4	214050001	214060000	1	Rhizobium daejeonense(1)		4-210790504	214055198	5.101553e-8	Rhizobium daejeonense
LN_chr8_15423	LN	8	154220001	154230000	1	Rhizobium daejeonense(1)	Zm00001d011548	8-149166202	154222056	3.379086e-8	Rhizobium daejeonense
LN_chr2_20321	LN	2	203200001	203210000	1	Chitinophaga pinensis(1)	Zm00001d006263	2-197443714	203205608	2.598432e-8	Chitinophaga pinensis
LN_chr7_14546	LN	7	145450001	145460000	1	Chitinophaga pinensis(1)	Zm00001d021191;Zm00001d021192;Zm00001d021193	7-140749672	145451599	4.758479000000001e-8	Chitinophaga pinensis
LN_chr8_11033	LN	8	110320001	110330000	1	Chitinophaga pinensis(1)	Zm00001d010337
LN_chr10_15075	LN	10	150740001	150750000	1	Chitinophaga pinensis(1)	Zm00001d026709	10-149437276	150747075	1.169893e-8	Chitinophaga pinensis
